# Supplementary material for: A protein-proximity screen reveals Ebola virus co-opts the mRNA decapping complex through the scaffold protein EDC4
Source: Research Square preprint supplement (doi:10.21203/rs.3.rs-3838220/v1), 2024-02-01
Supplement: Supplementary file 1 [file a26ccc6f4d71227f8bbba8e2.docx]

We made the Mass spec data is accessible through this link: [https://massive.ucsd.edu/ProteoSAFe/dataset.jsp?task=d7fd9d8dda8a4f779ce2fabb4d5351c0](https://urldefense.com/v3/__https:/massive.ucsd.edu/ProteoSAFe/dataset.jsp?task=d7fd9d8dda8a4f779ce2fabb4d5351c0__;!!NLFGqXoFfo8MMQ!ulNRYPAlBJjdIHlYwHl5ojyUfbKfAFnN8lMDjOTSHjEAGVeHk6n2njhX8LMWzVMWSEaSvGeYWSd2_OYkNHc$)

The Zenodo link to the software is through this link: [https://zenodo.org/records/10602284?token=eyJhbGciOiJIUzUxMiIsImlhdCI6MTcwNjczNDE1NCwiZXhwIjoxNzExOTI5NTk5fQ.eyJpZCI6IjRhODg5MTg0LTY2YmQtNDAyMy1hYzJiLTliZTNhYTFhY2YyMiIsImRhdGEiOnt9LCJyYW5kb20iOiJiNWEyNTVmNWY2ZTZkZGMzYTU2NzI0ZDFjNGNhYjNhMSJ9.RPAd0HgVmfmw3IIKzGUxjuzkF5KqMDxO2NWlFyH8k1ghA71N6Kmml5NH7E2iVy5WnxnJKMnKet6Wp3T11yN9xA](https://urldefense.com/v3/__https:/zenodo.org/records/10602284?token=eyJhbGciOiJIUzUxMiIsImlhdCI6MTcwNjczNDE1NCwiZXhwIjoxNzExOTI5NTk5fQ.eyJpZCI6IjRhODg5MTg0LTY2YmQtNDAyMy1hYzJiLTliZTNhYTFhY2YyMiIsImRhdGEiOnt9LCJyYW5kb20iOiJiNWEyNTVmNWY2ZTZkZGMzYTU2NzI0ZDFjNGNhYjNhMSJ9.RPAd0HgVmfmw3IIKzGUxjuzkF5KqMDxO2NWlFyH8k1ghA71N6Kmml5NH7E2iVy5WnxnJKMnKet6Wp3T11yN9xA__;!!NLFGqXoFfo8MMQ!ulNRYPAlBJjdIHlYwHl5ojyUfbKfAFnN8lMDjOTSHjEAGVeHk6n2njhX8LMWzVMWSEaSvGeYWSd2L5-IM30$)
