# Supplementary material for: A protein-proximity screen reveals Ebola virus co-opts the mRNA decapping complex through the scaffold protein EDC4
Source: Research Square preprint supplement (doi:10.21203/rs.3.rs-3838220/v1), 2024-02-01
Supplement: Supplementary file 2 [file Extended data table 1.xlsx]

## Sheet: BioID by Viral Protein vs All 
Bait	Bait Construct	Prey	UniProtID	Gene Name	Protein Interaction ID	SpecSum	AvgSpec	Saint Score	log Odds Score	Fold Change	BFDR	Ensembl Gene ID	Ensembl Gene description	NCBI Entrez Gene	NCBI Entrez Gene descriptiion
L	L_NT	HSPA8	B3KTV0	highly similar to HEAT SHOCK COGNATE 71 kDa PROTEIN	L|HSPA8	45	11.25	0.5	-2.84	112.5	0	ENSG00000109971	heat shock protein family A (Hsp70) member 8(HSPA8)	3312	heat shock protein family A (Hsp70) member 8(HSPA8)
NP	NP_CT	ABL2	P42684	ABL proto-oncogene 2, non-receptor tyrosine kinase(ABL2)	NP|ABL2	100	25	1	36.33	250	0	ENSG00000143322	ABL proto-oncogene 2, non-receptor tyrosine kinase(ABL2)	27	ABL proto-oncogene 2, non-receptor tyrosine kinase(ABL2)
NP	NP_CT	AHNAK2	Q8IVF2	AHNAK nucleoprotein 2(AHNAK2)	NP|AHNAK2	530	132.5	1	174.82	1325	0	ENSG00000185567	AHNAK nucleoprotein 2(AHNAK2)	113146	AHNAK nucleoprotein 2(AHNAK2)
NP	NP_NT	AP1G1	A0A140VJE7	adaptor related protein complex 1 gamma 1 subunit(AP1G1)	NP|AP1G1	71	17.75	1	19.8	177.5	0	ENSG00000166747	adaptor related protein complex 1 gamma 1 subunit(AP1G1)	164	adaptor related protein complex 1 gamma 1 subunit(AP1G1)
NP	NP_CT	ARHGAP29	Q52LW3	Rho GTPase activating protein 29(ARHGAP29)	NP|ARHGAP29	94	23.5	1	30.45	235	0	ENSG00000137962	Rho GTPase activating protein 29(ARHGAP29)	9411	Rho GTPase activating protein 29(ARHGAP29)
NP	NP_CT	ARHGEF16	B3KTS4	Rho guanine nucleotide exchange factor 16(ARHGEF16)	NP|ARHGEF16	65	16.25	1	21.5	162.5	0	ENSG00000130762	Rho guanine nucleotide exchange factor 16(ARHGEF16)	27237	Rho guanine nucleotide exchange factor 16(ARHGEF16)
NP	NP_NT	ATP6V1A	P38606-2	ATPase H+ transporting V1 subunit A(ATP6V1A)	NP|ATP6V1A	129	32.25	0.99	4	18.43	0	ENSG00000114573	ATPase H+ transporting V1 subunit A(ATP6V1A)	523	ATPase H+ transporting V1 subunit A(ATP6V1A)
NP	NP_CT	B6E4X6	B6E4X6	Cellular tumor antigen p53	NP|B6E4X6	291	72.75	1	105.89	727.5	0
NP	NP_NT	BACH1	O14867	BTB domain and CNC homolog 1(BACH1)	NP|BACH1	109	27.25	0.99	5.07	19.82	0			571	BTB domain and CNC homolog 1(BACH1)
NP	NP_CT	C16ORF70	A0A024R6W4	chromosome 16 open reading frame 70(C16orf70)	NP|C16ORF70	15	3.75	1	5.57	37.5	0	ENSG00000125149	chromosome 16 open reading frame 70(C16orf70)	80262	chromosome 16 open reading frame 70(C16orf70)
NP	NP_CT	C1ORF198	A0A024R3S1	chromosome 1 open reading frame 198(C1orf198)	NP|C1ORF198	29	7.25	1	10.63	72.5	0	ENSG00000119280	chromosome 1 open reading frame 198(C1orf198)	84886	chromosome 1 open reading frame 198(C1orf198)
NP	NP_CT	C6ORF132	Q5T0Z8	chromosome 6 open reading frame 132(C6orf132)	NP|C6ORF132	64	16	1	21.5	160	0	ENSG00000188112	chromosome 6 open reading frame 132(C6orf132)	647024	chromosome 6 open reading frame 132(C6orf132)
NP	NP_CT	CAMSAP2	Q08AD1	calmodulin regulated spectrin associated protein family member 2(CAMSAP2)	NP|CAMSAP2	161	40.25	1	56.66	402.5	0	ENSG00000118200	calmodulin regulated spectrin associated protein family member 2(CAMSAP2)	23271	calmodulin regulated spectrin associated protein family member 2(CAMSAP2)
NP	NP_CT	CAMSAP3	Q9P1Y5	calmodulin regulated spectrin associated protein family member 3(CAMSAP3)	NP|CAMSAP3	322	80.5	0.96	2.38	4.88	0	ENSG00000076826	calmodulin regulated spectrin associated protein family member 3(CAMSAP3)	57662	calmodulin regulated spectrin associated protein family member 3(CAMSAP3)
NP	NP_CT	CASC5	Q05C46	CASC5 protein	NP|CASC5	97	24.25	0.96	3	5.88	0
NP	NP_CT	CEP170B	J3KQR7	centrosomal protein 170B(CEP170B)	NP|CEP170B	62	15.5	0.75	-1.66	155	0.05	ENSG00000099814	centrosomal protein 170B(CEP170B)	283638	centrosomal protein 170B(CEP170B)
NP	NP_CT	CEP350	Q5VT06	centrosomal protein 350(CEP350)	NP|CEP350	79	19.75	0.75	-1.66	197.5	0.05	ENSG00000135837	centrosomal protein 350(CEP350)	9857	centrosomal protein 350(CEP350)
NP	NP_CT	CEP85L	Q5SZL2	centrosomal protein 85 like(CEP85L)	NP|CEP85L	87	21.75	1	27.49	217.5	0	ENSG00000111860	centrosomal protein 85 like(CEP85L)	387119	centrosomal protein 85 like(CEP85L)
NP	NP_CT	CGNL1	Q0VF96	cingulin like 1(CGNL1)	NP|CGNL1	496	124	1	170.57	1240	0	ENSG00000128849	cingulin like 1(CGNL1)	84952	cingulin like 1(CGNL1)
NP	NP_NT	COBL	O75128	cordon-bleu WH2 repeat protein(COBL)	NP|COBL	233	58.25	1	80.88	582.5	0	ENSG00000106078	cordon-bleu WH2 repeat protein(COBL)	23242	cordon-bleu WH2 repeat protein(COBL)
NP	NP_CT	CP110	A0A024QYV8	CP110 protein, isoform CRA_a	NP|CP110	198	49.5	1	5.14	9.66	0
NP	NP_NT	CPNE5	Q9HCH3	copine 5(CPNE5)	NP|CPNE5	36	9	0.95	2.73	9	0.01	ENSG00000124772	copine 5(CPNE5)	57699	copine 5(CPNE5)
NP	NP_CT	CSPP1	Q1MSJ5	centrosome and spindle pole associated protein 1(CSPP1)	NP|CSPP1	157	39.25	1	56.66	392.5	0	ENSG00000104218	centrosome and spindle pole associated protein 1(CSPP1)	79848	centrosome and spindle pole associated protein 1(CSPP1)
NP	NP_CT	DIP2B	Q9P265	disco interacting protein 2 homolog B(DIP2B)	NP|DIP2B	57	14.25	1	16.93	142.5	0	ENSG00000066084	disco interacting protein 2 homolog B(DIP2B)	57609	disco interacting protein 2 homolog B(DIP2B)
NP	NP_CT	DZIP3	Q86Y13	DAZ interacting zinc finger protein 3(DZIP3)	NP|DZIP3	72	18	1	21.5	180	0	ENSG00000198919	DAZ interacting zinc finger protein 3(DZIP3)	9666	DAZ interacting zinc finger protein 3(DZIP3)
NP	NP_CT	EGLN1	R4RZ18	egl-9 family hypoxia inducible factor 1(EGLN1)	NP|EGLN1	336	84	0.99	4.66	8.1	0	ENSG00000135766	egl-9 family hypoxia inducible factor 1(EGLN1)	54583	egl-9 family hypoxia inducible factor 1(EGLN1)
NP	NP_NT	FAM117B	Q6P1L5	family with sequence similarity 117 member B(FAM117B)	NP|FAM117B	30	7.5	0.93	1.86	8.57	0.01	ENSG00000138439	family with sequence similarity 117 member B(FAM117B)	150864	family with sequence similarity 117 member B(FAM117B)
NP	NP_CT	FAM188B	Q4G0A6	family with sequence similarity 188 member B(FAM188B)	NP|FAM188B	40	10	1	15.38	100	0	ENSG00000106125	family with sequence similarity 188 member B(FAM188B)	84182	family with sequence similarity 188 member B(FAM188B)
NP	NP_CT	FAM83G	A6ND36	family with sequence similarity 83 member G(FAM83G)	NP|FAM83G	42	10.5	1	15.38	105	0	ENSG00000188522	family with sequence similarity 83 member G(FAM83G)	644815	family with sequence similarity 83 member G(FAM83G)
NP	NP_CT	GEN1	Q17RS7	GEN1, Holliday junction 5' flap endonuclease(GEN1)	NP|GEN1	95	23.75	1	34.87	237.5	0	ENSG00000178295	GEN1, Holliday junction 5' flap endonuclease(GEN1)	348654	GEN1, Holliday junction 5' flap endonuclease(GEN1)
NP	NP_CT	GIT1	Q9Y2X7	GIT ArfGAP 1(GIT1)	NP|GIT1	174	43.5	1	50.88	435	0	ENSG00000108262	GIT ArfGAP 1(GIT1)	28964	GIT ArfGAP 1(GIT1)
NP	NP_NT	GNE	Q6QNY5	glucosamine (UDP-N-acetyl)-2-epimerase/N-acetylmannosamine kinase(GNE)	NP|GNE	46	11.5	1	16.74	115	0	ENSG00000159921	glucosamine (UDP-N-acetyl)-2-epimerase/N-acetylmannosamine kinase(GNE)	10020	glucosamine (UDP-N-acetyl)-2-epimerase/N-acetylmannosamine kinase(GNE)
NP	NP_CT	HAUS8	Q9BT25	HAUS augmin like complex subunit 8(HAUS8)	NP|HAUS8	35	8.75	1	12.24	87.5	0	ENSG00000131351	HAUS augmin like complex subunit 8(HAUS8)	93323	HAUS augmin like complex subunit 8(HAUS8)
NP	NP_CT	IFT74	A0PJM7	intraflagellar transport 74(IFT74)	NP|IFT74	338	84.5	0.99	4.2	7.51	0	ENSG00000096872	intraflagellar transport 74(IFT74)	80173	intraflagellar transport 74(IFT74)
NP	NP_CT	INPPL1	O15357	inositol polyphosphate phosphatase like 1(INPPL1)	NP|INPPL1	58	14.5	1	21.5	145	0	ENSG00000165458	inositol polyphosphate phosphatase like 1(INPPL1)	3636	inositol polyphosphate phosphatase like 1(INPPL1)
NP	NP_CT	KATNB1	Q9BVA0	katanin regulatory subunit B1(KATNB1)	NP|KATNB1	20	5	0.99	3.8	20	0	ENSG00000140854	katanin regulatory subunit B1(KATNB1)	10300	katanin regulatory subunit B1(KATNB1)
NP	NP_CT	KIAA0368	J3KN16	KIAA0368(KIAA0368)	NP|KIAA0368	145	36.25	0.98	3.55	8.53	0	ENSG00000136813	KIAA0368(KIAA0368)	23392	KIAA0368(KIAA0368)
NP	NP_CT	KIAA1217	Q5T5P2	KIAA1217(KIAA1217)	NP|KIAA1217	206	51.5	1	63.86	515	0	ENSG00000120549	KIAA1217(KIAA1217)	56243	KIAA1217(KIAA1217)
NP	NP_NT	KNL1	Q8NG31	kinetochore scaffold 1(KNL1)	NP|KNL1	440	110	0.99	4.46	7.52	0	ENSG00000137812	kinetochore scaffold 1(KNL1)	57082	kinetochore scaffold 1(KNL1)
NP	NP_CT	LMO7	B7Z8W3	cDNA FLJ53272, highly similar to Homo sapiens LIM domain 7 (LMO7), mRNA	NP|LMO7	56	14	1	18.46	140	0	ENSG00000136153	LIM domain 7(LMO7)	4008	LIM domain 7(LMO7)
NP	NP_NT	LUZP1	A0A024RAC0	leucine zipper protein 1(LUZP1)	NP|LUZP1	276	69	0.99	4.69	12	0	ENSG00000169641	leucine zipper protein 1(LUZP1)	7798	leucine zipper protein 1(LUZP1)
NP	NP_CT	MAP7D3	Q8IWC1	MAP7 domain containing 3(MAP7D3)	NP|MAP7D3	258	64.5	1	93.91	645	0	ENSG00000129680	MAP7 domain containing 3(MAP7D3)	79649	MAP7 domain containing 3(MAP7D3)
NP	NP_CT	MIS18BP1	Q6P0N0	MIS18 binding protein 1(MIS18BP1)	NP|MIS18BP1	68	17	1	23	170	0	ENSG00000129534	MIS18 binding protein 1(MIS18BP1)	55320	MIS18 binding protein 1(MIS18BP1)
NP	NP_NT	MSN	V9HWC0	moesin(MSN)	NP|MSN	50	12.5	1	18.28	125	0	ENSG00000147065	moesin(MSN)	4478	moesin(MSN)
NP	NP_CT	MTHFD1	B7Z809	C-1-tetrahydrofolate synthase, cytoplasmic	NP|MTHFD1	60	15	1	21.5	150	0	ENSG00000100714	methylenetetrahydrofolate dehydrogenase, cyclohydrolase and formyltetrahydrofolate synthetase 1(MTHFD1)	4522	methylenetetrahydrofolate dehydrogenase, cyclohydrolase and formyltetrahydrofolate synthetase 1(MTHFD1)
NP	NP_CT	MTUS1	Q9ULD2	microtubule associated tumor suppressor 1(MTUS1)	NP|MTUS1	58	14.5	0.75	-1.66	145	0.05	ENSG00000129422	microtubule associated tumor suppressor 1(MTUS1)	57509	microtubule associated tumor suppressor 1(MTUS1)
NP	NP_CT	NAV1	Q8NEY1	neuron navigator 1(NAV1)	NP|NAV1	269	67.25	1	86.78	672.5	0	ENSG00000134369	neuron navigator 1(NAV1)	89796	neuron navigator 1(NAV1)
NP	NP_CT	NCKAP5L	Q9HCH0	NCK associated protein 5 like(NCKAP5L)	NP|NCKAP5L	104	26	1	34.87	260	0	ENSG00000167566	NCK associated protein 5 like(NCKAP5L)	57701	NCK associated protein 5 like(NCKAP5L)
NP	NP_CT	NEDD1	A0A024RBE5	neural precursor cell expressed, developmentally down-regulated 1(NEDD1)	NP|NEDD1	346	86.5	1	14.06	98.86	0	ENSG00000139350	neural precursor cell expressed, developmentally down-regulated 1(NEDD1)	121441	neural precursor cell expressed, developmentally down-regulated 1(NEDD1)
NP	NP_CT	NFRKB	A0A024R3K9	nuclear factor related to kappaB binding protein(NFRKB)	NP|NFRKB	84	21	1	28.97	210	0	ENSG00000170322	nuclear factor related to kappaB binding protein(NFRKB)	4798	nuclear factor related to kappaB binding protein(NFRKB)
NP	NP_NT	NMT1	Q96HI4	N-myristoyltransferase 1(NMT1)	NP|NMT1	23	5.75	1	7.13	57.5	0	ENSG00000136448	N-myristoyltransferase 1(NMT1)	4836	N-myristoyltransferase 1(NMT1)
NP	NP_CT	NPAT	B9EG70	nuclear protein, coactivator of histone transcription(NPAT)	NP|NPAT	129	32.25	0.75	-1.66	322.5	0.03	ENSG00000149308	nuclear protein, coactivator of histone transcription(NPAT)	4863	nuclear protein, coactivator of histone transcription(NPAT)
NP	NP_CT	PDLIM5	B7Z481	PDZ and LIM domain 5(PDLIM5)	NP|PDLIM5	88	22	1	31.93	220	0	ENSG00000163110	PDZ and LIM domain 5(PDLIM5)	10611	PDZ and LIM domain 5(PDLIM5)
NP	NP_CT	PEAK1	Q9H792	pseudopodium enriched atypical kinase 1(PEAK1)	NP|PEAK1	89	22.25	1	30.45	222.5	0	ENSG00000173517	pseudopodium enriched atypical kinase 1(PEAK1)	79834	pseudopodium enriched atypical kinase 1(PEAK1)
NP	NP_CT	PIK3C2A	L7RRS0	phosphatidylinositol-4-phosphate 3-kinase catalytic subunit type 2 alpha(PIK3C2A)	NP|PIK3C2A	139	34.75	1	47.99	347.5	0	ENSG00000011405	phosphatidylinositol-4-phosphate 3-kinase catalytic subunit type 2 alpha(PIK3C2A)	5286	phosphatidylinositol-4-phosphate 3-kinase catalytic subunit type 2 alpha(PIK3C2A)
NP	NP_CT	PLEKHG1	Q5JYA6	pleckstrin homology and RhoGEF domain containing G1(PLEKHG1)	NP|PLEKHG1	108	27	1	37.8	270	0	ENSG00000120278	pleckstrin homology and RhoGEF domain containing G1(PLEKHG1)	57480	pleckstrin homology and RhoGEF domain containing G1(PLEKHG1)
NP	NP_CT	POC5	Q8NA72	POC5 centriolar protein(POC5)	NP|POC5	312	78	1	111	780	0	ENSG00000152359	POC5 centriolar protein(POC5)	134359	POC5 centriolar protein(POC5)
NP	NP_NT	POLR3D	P05423	RNA polymerase III subunit D(POLR3D)	NP|POLR3D	37	9.25	1	10.45	92.5	0	ENSG00000168495	RNA polymerase III subunit D(POLR3D)	661	RNA polymerase III subunit D(POLR3D)
NP	NP_CT	PPM1A	P35813-3	protein phosphatase, Mg2+/Mn2+ dependent 1A(PPM1A)	NP|PPM1A	46	11.5	0.97	2.53	10.22	0	ENSG00000100614	protein phosphatase, Mg2+/Mn2+ dependent 1A(PPM1A)	5494	protein phosphatase, Mg2+/Mn2+ dependent 1A(PPM1A)
NP	NP_NT	PPP2R2A	A0A140VJT0	protein phosphatase 2 regulatory subunit Balpha(PPP2R2A)	NP|PPP2R2A	25	6.25	1	8.81	62.5	0	ENSG00000221914	protein phosphatase 2 regulatory subunit Balpha(PPP2R2A)	5520	protein phosphatase 2 regulatory subunit Balpha(PPP2R2A)
NP	NP_CT	PPP2R5C	Q13362	protein phosphatase 2 regulatory subunit B'gamma(PPP2R5C)	NP|PPP2R5C	285	71.25	1	95.34	712.5	0	ENSG00000078304	protein phosphatase 2 regulatory subunit B'gamma(PPP2R5C)	5527	protein phosphatase 2 regulatory subunit B'gamma(PPP2R5C)
NP	NP_CT	PPP2R5D	A0A024RD11	protein phosphatase 2 regulatory subunit B'delta(PPP2R5D)	NP|PPP2R5D	376	94	1	15.3	125.33	0	ENSG00000112640	protein phosphatase 2 regulatory subunit B'delta(PPP2R5D)	5528	protein phosphatase 2 regulatory subunit B'delta(PPP2R5D)
NP	NP_NT	RBBP4	Q09028	RB binding protein 4, chromatin remodeling factor(RBBP4)	NP|RBBP4	114	28.5	1	40.54	285	0	ENSG00000162521	RB binding protein 4, chromatin remodeling factor(RBBP4)	5928	RB binding protein 4, chromatin remodeling factor(RBBP4)
NP	NP_NT	RBBP7	Q6FHQ0	RB binding protein 7, chromatin remodeling factor(RBBP7)	NP|RBBP7	225	56.25	1	79.45	562.5	0	ENSG00000102054	RB binding protein 7, chromatin remodeling factor(RBBP7)	5931	RB binding protein 7, chromatin remodeling factor(RBBP7)
NP	NP_NT	RPL17	A0A024R261	ribosomal protein L17(RPL17)	NP|RPL17	43	10.75	1	16.74	107.5	0	ENSG00000265681	ribosomal protein L17(RPL17)	6139	ribosomal protein L17(RPL17)
NP	NP_NT	RPS10	P46783	ribosomal protein S10(RPS10)	NP|RPS10	42	10.5	1	15.2	105	0	ENSG00000124614	ribosomal protein S10(RPS10)	6204	ribosomal protein S10(RPS10)
NP	NP_NT	RPS12	P25398	ribosomal protein S12(RPS12)	NP|RPS12	35	8.75	1	10.45	87.5	0	ENSG00000112306	ribosomal protein S12(RPS12)	6206	ribosomal protein S12(RPS12)
NP	NP_NT	RPS14	P62263	ribosomal protein S14(RPS14)	NP|RPS14	34	8.5	1	12.05	85	0	ENSG00000164587	ribosomal protein S14(RPS14)	6208	ribosomal protein S14(RPS14)
NP	NP_CT	RPS2	Q3KQT6	ribosomal protein S2(RPS2)	NP|RPS2	53	13.25	1	15.38	132.5	0	ENSG00000140988	ribosomal protein S2(RPS2)	6187	ribosomal protein S2(RPS2)
NP	NP_NT	RPS20	P60866	ribosomal protein S20(RPS20)	NP|RPS20	33	8.25	1	10.45	82.5	0	ENSG00000008988	ribosomal protein S20(RPS20)	6224	ribosomal protein S20(RPS20)
NP	NP_NT	RPS27	Q5T4L4	ribosomal protein S27(RPS27)	NP|RPS27	37	9.25	1	10.45	92.5	0	ENSG00000177954	ribosomal protein S27(RPS27)	6232	ribosomal protein S27(RPS27)
NP	NP_NT	RPS28	B2R4R9	ribosomal protein S28(RPS28)	NP|RPS28	22	5.5	1	7.13	55	0	ENSG00000233927	ribosomal protein S28(RPS28)	6234	ribosomal protein S28(RPS28)
NP	NP_CT	SDCCAG3	Q96C92	serologically defined colon cancer antigen 3(SDCCAG3)	NP|SDCCAG3	73	18.25	1	26	182.5	0	ENSG00000165689	serologically defined colon cancer antigen 3(SDCCAG3)	10807	serologically defined colon cancer antigen 3(SDCCAG3)
NP	NP_CT	SECISBP2	B4DZC7	SECIS binding protein 2(SECISBP2)	NP|SECISBP2	85	21.25	0.75	-1.66	212.5	0.04	ENSG00000187742	SECIS binding protein 2(SECISBP2)	79048	SECIS binding protein 2(SECISBP2)
NP	NP_CT	SEPT	Q9UHD8	septin 9(SEPT9)	NP|SEPT	46	11.5	1	16.08	115	0
NP	NP_CT	SH3PXD2B	A1X283	SH3 and PX domains 2B(SH3PXD2B)	NP|SH3PXD2B	33	8.25	1	13.82	82.5	0	ENSG00000174705	SH3 and PX domains 2B(SH3PXD2B)	285590	SH3 and PX domains 2B(SH3PXD2B)
NP	NP_CT	SIPA1L1	O43166-2	signal induced proliferation associated 1 like 1(SIPA1L1)	NP|SIPA1L1	211	52.75	0.75	-1.66	527.5	0.03	ENSG00000197555	signal induced proliferation associated 1 like 1(SIPA1L1)	26037	signal induced proliferation associated 1 like 1(SIPA1L1)
NP	NP_CT	SIPA1L2	Q9P2F8	signal induced proliferation associated 1 like 2(SIPA1L2)	NP|SIPA1L2	68	17	1	24.5	170	0	ENSG00000116991	signal induced proliferation associated 1 like 2(SIPA1L2)	57568	signal induced proliferation associated 1 like 2(SIPA1L2)
NP	NP_CT	SKA1	A0A024R294	spindle and kinetochore associated complex subunit 1(SKA1)	NP|SKA1	30	7.5	1	8.99	75	0	ENSG00000154839	spindle and kinetochore associated complex subunit 1(SKA1)	220134	spindle and kinetochore associated complex subunit 1(SKA1)
NP	NP_NT	SND1	A0A140VK49	staphylococcal nuclease and tudor domain containing 1(SND1)	NP|SND1	173	43.25	1	60.8	432.5	0	ENSG00000197157	staphylococcal nuclease and tudor domain containing 1(SND1)	27044	staphylococcal nuclease and tudor domain containing 1(SND1)
NP	NP_NT	SNX3	O60493	sorting nexin 3(SNX3)	NP|SNX3	23	5.75	0.94	2.41	9.2	0.01	ENSG00000112335	sorting nexin 3(SNX3)	8724	sorting nexin 3(SNX3)
NP	NP_NT	SOS1	G5E9C8	SOS Ras/Rac guanine nucleotide exchange factor 1(SOS1)	NP|SOS1	36	9	1	13.64	90	0	ENSG00000115904	SOS Ras/Rac guanine nucleotide exchange factor 1(SOS1)	6654	SOS Ras/Rac guanine nucleotide exchange factor 1(SOS1)
NP	NP_NT	SRSF3	A0A087X2D0	serine and arginine rich splicing factor 3(SRSF3)	NP|SRSF3	16	4	0.99	3.55	40	0	ENSG00000112081	serine and arginine rich splicing factor 3(SRSF3)	6428	serine and arginine rich splicing factor 3(SRSF3)
NP	NP_CT	SVIL	O95425-4	supervillin(SVIL)	NP|SVIL	141	35.25	0.75	-1.66	352.5	0.03	ENSG00000197321	supervillin(SVIL)	6840	supervillin(SVIL)
NP	NP_CT	SYNJ2	O15056	synaptojanin 2(SYNJ2)	NP|SYNJ2	130	32.5	1	45.09	325	0	ENSG00000078269	synaptojanin 2(SYNJ2)	8871	synaptojanin 2(SYNJ2)
NP	NP_CT	TAB3	Q8N5C8	TGF-beta activated kinase 1/MAP3K7 binding protein 3(TAB3)	NP|TAB3	40	10	1	12.24	100	0	ENSG00000157625	TGF-beta activated kinase 1/MAP3K7 binding protein 3(TAB3)	257397	TGF-beta activated kinase 1/MAP3K7 binding protein 3(TAB3)
NP	NP_CT	TANC1	Q9C0D5	tetratricopeptide repeat, ankyrin repeat and coiled-coil containing 1(TANC1)	NP|TANC1	496	124	1	10.23	70.86	0	ENSG00000115183	tetratricopeptide repeat, ankyrin repeat and coiled-coil containing 1(TANC1)	85461	tetratricopeptide repeat, ankyrin repeat and coiled-coil containing 1(TANC1)
NP	NP_CT	TP53	E5RMA8	tumor protein p53(TP53)	NP|TP53	312	78	1	9.03	28.36	0	ENSG00000141510	tumor protein p53(TP53)	7157	tumor protein p53(TP53)
NP	NP_NT	TPT1	A0A0B4J2C3	tumor protein, translationally-controlled 1(TPT1)	NP|TPT1	36	9	1	13.64	90	0	ENSG00000133112	tumor protein, translationally-controlled 1(TPT1)	7178	tumor protein, translationally-controlled 1(TPT1)
NP	NP_CT	TRIM25	Q59GW5	Tripartite motif-containing 25 variant	NP|TRIM25	250	62.5	0.99	4.54	10.64	0			7706	tripartite motif containing 25(TRIM25)
NP	NP_CT	TTF2	A0A024R0F1	transcription termination factor 2(TTF2)	NP|TTF2	474	118.5	1	6.15	11.15	0	ENSG00000116830	transcription termination factor 2(TTF2)	8458	transcription termination factor 2(TTF2)
NP	NP_CT	TUBGCP2	Q9BSJ2	tubulin gamma complex associated protein 2(TUBGCP2)	NP|TUBGCP2	128	32	1	40.72	320	0	ENSG00000130640	tubulin gamma complex associated protein 2(TUBGCP2)	10844	tubulin gamma complex associated protein 2(TUBGCP2)
NP	NP_CT	TUBGCP3	Q96CW5	tubulin gamma complex associated protein 3(TUBGCP3)	NP|TUBGCP3	67	16.75	1	24.5	167.5	0	ENSG00000126216	tubulin gamma complex associated protein 3(TUBGCP3)	10426	tubulin gamma complex associated protein 3(TUBGCP3)
NP	NP_CT	TUBGCP4	Q9UGJ1	tubulin gamma complex associated protein 4(TUBGCP4)	NP|TUBGCP4	61	15.25	1	16.93	152.5	0	ENSG00000137822	tubulin gamma complex associated protein 4(TUBGCP4)	27229	tubulin gamma complex associated protein 4(TUBGCP4)
NP	NP_CT	TUFT1	B7Z4Y1	tuftelin 1(TUFT1)	NP|TUFT1	46	11.5	1	13.82	115	0	ENSG00000143367	tuftelin 1(TUFT1)	7286	tuftelin 1(TUFT1)
NP	NP_CT	UBN2	Q6ZU65	ubinuclein 2(UBN2)	NP|UBN2	114	28.5	1	40.72	285	0	ENSG00000157741	ubinuclein 2(UBN2)	254048	ubinuclein 2(UBN2)
NP	NP_CT	USP53	Q70EK8	ubiquitin specific peptidase 53(USP53)	NP|USP53	59	14.75	1	18.46	147.5	0	ENSG00000145390	ubiquitin specific peptidase 53(USP53)	54532	ubiquitin specific peptidase 53(USP53)
NP	NP_CT	ZC3H7A	Q8IWR0	zinc finger CCCH-type containing 7A(ZC3H7A)	NP|ZC3H7A	66	16.5	1	21.5	165	0	ENSG00000122299	zinc finger CCCH-type containing 7A(ZC3H7A)	29066	zinc finger CCCH-type containing 7A(ZC3H7A)
NP	NP_NT	ZNF507	Q8TCN5	zinc finger protein 507(ZNF507)	NP|ZNF507	101	25.25	1	33.22	252.5	0	ENSG00000168813	zinc finger protein 507(ZNF507)	22847	zinc finger protein 507(ZNF507)
VP24	VP24_CT	BCCIP	Q9P287	BRCA2 and CDKN1A interacting protein(BCCIP)	VP24|BCCIP	142	35.5	0.99	4.16	11.83	0	ENSG00000107949	BRCA2 and CDKN1A interacting protein(BCCIP)	56647	BRCA2 and CDKN1A interacting protein(BCCIP)
VP24	VP24_CT	CACUL1	Q86Y37	CDK2 associated cullin domain 1(CACUL1)	VP24|CACUL1	87	21.75	1	31.27	217.5	0	ENSG00000151893	CDK2 associated cullin domain 1(CACUL1)	143384	CDK2 associated cullin domain 1(CACUL1)
VP24	VP24_CT	CCAR2	B3KTJ9	Cell cycle and apoptosis regulator protein 2	VP24|CCAR2	198	49.5	0.96	2.72	5.91	0	ENSG00000158941	cell cycle and apoptosis regulator 2(CCAR2)	57805	cell cycle and apoptosis regulator 2(CCAR2)
VP24	VP24_NT	CSE1L	P55060	chromosome segregation 1 like(CSE1L)	VP24|CSE1L	1866	466.5	1	12.72	21.7	0	ENSG00000124207	chromosome segregation 1 like(CSE1L)	1434	chromosome segregation 1 like(CSE1L)
VP24	VP24_NT	EIF2S2	B5BU01	eukaryotic translation initiation factor 2 subunit beta(EIF2S2)	VP24|EIF2S2	16	4	1	5.16	40	0	ENSG00000125977	eukaryotic translation initiation factor 2 subunit beta(EIF2S2)	8894	eukaryotic translation initiation factor 2 subunit beta(EIF2S2)
VP24	VP24_CT	GATAD2B	A0A0U1RRM1	GATA zinc finger domain containing 2B(GATAD2B)	VP24|GATAD2B	86	21.5	0.94	2.42	6.37	0.01	ENSG00000143614	GATA zinc finger domain containing 2B(GATAD2B)	57459	GATA zinc finger domain containing 2B(GATAD2B)
VP24	VP24_CT	GTF2A1	P52655	general transcription factor IIA subunit 1(GTF2A1)	VP24|GTF2A1	59	14.75	1	20.84	147.5	0	ENSG00000165417	general transcription factor IIA subunit 1(GTF2A1)	2957	general transcription factor IIA subunit 1(GTF2A1)
VP24	VP24_NT	HDLBP	B2R5V9	high density lipoprotein binding protein(HDLBP)	VP24|HDLBP	185	46.25	0.75	-2.32	462.5	0.03	ENSG00000115677	high density lipoprotein binding protein(HDLBP)	3069	high density lipoprotein binding protein(HDLBP)
VP24	VP24_CT	ICE1	Q9Y2F5	interactor of little elongation complex ELL subunit 1(ICE1)	VP24|ICE1	214	53.5	1	67.52	535	0	ENSG00000164151	interactor of little elongation complex ELL subunit 1(ICE1)	23379	interactor of little elongation complex ELL subunit 1(ICE1)
VP24	VP24_CT	ICE2	A0A024R5V9	interactor of little elongation complex ELL subunit 2(ICE2)	VP24|ICE2	78	19.5	1	25.34	195	0	ENSG00000128915	interactor of little elongation complex ELL subunit 2(ICE2)	79664	interactor of little elongation complex ELL subunit 2(ICE2)
VP24	VP24_NT	IPO9	Q96P70	importin 9(IPO9)	VP24|IPO9	21	5.25	1	6.91	52.5	0	ENSG00000198700	importin 9(IPO9)	55705	importin 9(IPO9)
VP24	VP24_NT	JPH1	Q4KMX3	junctophilin 1(JPH1)	VP24|JPH1	65	16.25	1	19.57	162.5	0	ENSG00000104369	junctophilin 1(JPH1)	56704	junctophilin 1(JPH1)
VP24	VP24_CT	KPNA1	P52294	karyopherin subunit alpha 1(KPNA1)	VP24|KPNA1	580	145	1	203.86	1450	0	ENSG00000114030	karyopherin subunit alpha 1(KPNA1)	3836	karyopherin subunit alpha 1(KPNA1)
VP24	VP24_NT	KPNA2	Q6NVW7	karyopherin subunit alpha 2(KPNA2)	VP24|KPNA2	200	50	1	67.76	500	0	ENSG00000182481	karyopherin subunit alpha 2(KPNA2)	3838	karyopherin subunit alpha 2(KPNA2)
VP24	VP24_CT	KPNA5	O15131	karyopherin subunit alpha 5(KPNA5)	VP24|KPNA5	323	80.75	0.75	-2.19	807.5	0.04	ENSG00000196911	karyopherin subunit alpha 5(KPNA5)	3841	karyopherin subunit alpha 5(KPNA5)
VP24	VP24_CT	KPNA6	B4DWX3	Importin subunit alpha-7	VP24|KPNA6	717	179.25	1	251.87	1792.5	0	ENSG00000025800	karyopherin subunit alpha 6(KPNA6)	23633	karyopherin subunit alpha 6(KPNA6)
VP24	VP24_NT	MCM3AP	O60318	minichromosome maintenance complex component 3 associated protein(MCM3AP)	VP24|MCM3AP	253	63.25	1	82.08	632.5	0	ENSG00000160294	minichromosome maintenance complex component 3 associated protein(MCM3AP)	8888	minichromosome maintenance complex component 3 associated protein(MCM3AP)
VP24	VP24_CT	MTA2	A0A024R534	metastasis associated 1 family member 2(MTA2)	VP24|MTA2	59	14.75	0.94	2.57	9.08	0.01	ENSG00000149480	metastasis associated 1 family member 2(MTA2)	9219	metastasis associated 1 family member 2(MTA2)
VP24	VP24_CT	NIFK	Q9BYG3	nucleolar protein interacting with the FHA domain of MKI67(NIFK)	VP24|NIFK	134	33.5	1	8.16	53.6	0	ENSG00000155438	nucleolar protein interacting with the FHA domain of MKI67(NIFK)	84365	nucleolar protein interacting with the FHA domain of MKI67(NIFK)
VP24	VP24_CT	NUP62	A0A024QZF1	nucleoporin 62(NUP62)	VP24|NUP62	60	15	0.98	3.06	9.23	0	ENSG00000213024	nucleoporin 62(NUP62)	23636	nucleoporin 62(NUP62)
VP24	VP24_NT	OSBPL8	A0A024RBB8	oxysterol binding protein like 8(OSBPL8)	VP24|OSBPL8	499	124.75	1	37.45	332.67	0	ENSG00000091039	oxysterol binding protein like 8(OSBPL8)	114882	oxysterol binding protein like 8(OSBPL8)
VP24	VP24_CT	POLR3C	A0A024R4C1	RNA polymerase III subunit C(POLR3C)	VP24|POLR3C	95	23.75	1	32.75	237.5	0	ENSG00000186141	RNA polymerase III subunit C(POLR3C)	10623	RNA polymerase III subunit C(POLR3C)
VP24	VP24_NT	POM121	Q96HA1	POM121 transmembrane nucleoporin(POM121)	VP24|POM121	149	37.25	1	50.48	372.5	0	ENSG00000196313	POM121 transmembrane nucleoporin(POM121)	9883	POM121 transmembrane nucleoporin(POM121)
VP24	VP24_CT	POM121C	A0A075B7F8	POM121 transmembrane nucleoporin C(POM121C)	VP24|POM121C	190	47.5	1	64.64	475	0	ENSG00000272391	POM121 transmembrane nucleoporin C(POM121C)	100101267	POM121 transmembrane nucleoporin C(POM121C)
VP24	VP24_CT	PTPN2	A8K3N4	protein tyrosine phosphatase, non-receptor type 2(PTPN2)	VP24|PTPN2	65	16.25	0.98	3.18	14.44	0	ENSG00000175354	protein tyrosine phosphatase, non-receptor type 2(PTPN2)	5771	protein tyrosine phosphatase, non-receptor type 2(PTPN2)
VP24	VP24_NT	RPS25	P62851	ribosomal protein S25(RPS25)	VP24|RPS25	17	4.25	1	6.91	42.5	0	ENSG00000118181	ribosomal protein S25(RPS25)	6230	ribosomal protein S25(RPS25)
VP24	VP24_NT	SPDL1	Q96EA4	spindle apparatus coiled-coil protein 1(SPDL1)	VP24|SPDL1	35	8.75	1	11.83	87.5	0	ENSG00000040275	spindle apparatus coiled-coil protein 1(SPDL1)	54908	spindle apparatus coiled-coil protein 1(SPDL1)
VP24	VP24_CT	TAF1	P21675	TATA-box binding protein associated factor 1(TAF1)	VP24|TAF1	282	70.5	1	88.98	705	0	ENSG00000147133	TATA-box binding protein associated factor 1(TAF1)	6872	TATA-box binding protein associated factor 1(TAF1)
VP24	VP24_CT	TAF4	O00268	TATA-box binding protein associated factor 4(TAF4)	VP24|TAF4	41	10.25	1	11.58	102.5	0			6874	TATA-box binding protein associated factor 4(TAF4)
VP24	VP24_NT	TAF9	Q16594	TATA-box binding protein associated factor 9(TAF9)	VP24|TAF9	98	24.5	0.93	2.12	5.3	0.01	ENSG00000273841	TATA-box binding protein associated factor 9(TAF9)	6880	TATA-box binding protein associated factor 9(TAF9)
VP24	VP24_NT	TAF9B	Q9HBM6	TATA-box binding protein associated factor 9b(TAF9B)	VP24|TAF9B	79	19.75	1	27.08	197.5	0	ENSG00000187325	TATA-box binding protein associated factor 9b(TAF9B)	51616	TATA-box binding protein associated factor 9b(TAF9B)
VP24	VP24_NT	TCP1	P17987	t-complex 1(TCP1)	VP24|TCP1	60	15	1	14.97	150	0	ENSG00000120438	t-complex 1(TCP1)	6950	t-complex 1(TCP1)
VP24	VP24_NT	USP9X	Q93008	ubiquitin specific peptidase 9, X-linked(USP9X)	VP24|USP9X	63	15.75	1	19.57	157.5	0	ENSG00000124486	ubiquitin specific peptidase 9, X-linked(USP9X)	8239	ubiquitin specific peptidase 9, X-linked(USP9X)
VP24	VP24_NT	WASF1	Q92558	WAS protein family member 1(WASF1)	VP24|WASF1	49	12.25	1	16.52	122.5	0	ENSG00000112290	WAS protein family member 1(WASF1)	8936	WAS protein family member 1(WASF1)
VP24	VP24_NT	WASF2	Q9Y6W5	WAS protein family member 2(WASF2)	VP24|WASF2	158	39.5	1	53.37	395	0	ENSG00000158195	WAS protein family member 2(WASF2)	10163	WAS protein family member 2(WASF2)
VP24	VP24_CT	WDR12	Q9GZL7	WD repeat domain 12(WDR12)	VP24|WDR12	113	28.25	1	38.61	282.5	0	ENSG00000138442	WD repeat domain 12(WDR12)	55759	WD repeat domain 12(WDR12)
VP30	VP30_CT	AFDN	A8MQ02	afadin, adherens junction formation factor(AFDN)	VP30|AFDN	214	53.5	1	72.93	535	0	ENSG00000130396	afadin, adherens junction formation factor(AFDN)	4301	afadin, adherens junction formation factor(AFDN)
VP30	VP30_CT	LARP4	Q71RC2	La ribonucleoprotein domain family member 4(LARP4)	VP30|LARP4	36	9	1	11.26	90	0	ENSG00000161813	La ribonucleoprotein domain family member 4(LARP4)	113251	La ribonucleoprotein domain family member 4(LARP4)
VP30	VP30_CT	LARP4B	Q92615	La ribonucleoprotein domain family member 4B(LARP4B)	VP30|LARP4B	56	14	0.99	3.61	28	0	ENSG00000107929	La ribonucleoprotein domain family member 4B(LARP4B)	23185	La ribonucleoprotein domain family member 4B(LARP4B)
VP30	VP30_CT	MAPT	A0A024R9Y0	microtubule associated protein tau(MAPT)	VP30|MAPT	32	8	1	9.65	80	0	ENSG00000186868	microtubule associated protein tau(MAPT)	4137	microtubule associated protein tau(MAPT)
VP30	VP30_NT	MPHOSPH9	A0A0A0MTP3	M-phase phosphoprotein 9(MPHOSPH9)	VP30|MPHOSPH9	54	13.5	1	14.56	135	0	ENSG00000051825	M-phase phosphoprotein 9(MPHOSPH9)	10198	M-phase phosphoprotein 9(MPHOSPH9)
VP30	VP30_CT	PABPC1	A0A024R9C1	poly(A) binding protein cytoplasmic 1(PABPC1)	VP30|PABPC1	209	52.25	1	7.2	46.44	0			26986	poly(A) binding protein cytoplasmic 1(PABPC1)
VP30	VP30_NT	PATL1	Q86TB9-4	PAT1 homolog 1, processing body mRNA decay factor(PATL1)	VP30|PATL1	38	9.5	0.75	-3.13	95	0.04	ENSG00000166889	PAT1 homolog 1, processing body mRNA decay factor(PATL1)	219988	PAT1 homolog 1, processing body mRNA decay factor(PATL1)
VP30	VP30_NT	RBBP6	Q7Z6E9	RB binding protein 6, ubiquitin ligase(RBBP6)	VP30|RBBP6	1008	252	1	10.48	27.62	0	ENSG00000122257	RB binding protein 6, ubiquitin ligase(RBBP6)	5930	RB binding protein 6, ubiquitin ligase(RBBP6)
VP30	VP30_CT	RBMS1	A0A0S2Z499	RNA binding motif single stranded interacting protein 1(RBMS1)	VP30|RBMS1	26	6.5	1	8.02	65	0			5937	RNA binding motif single stranded interacting protein 1(RBMS1)
VP30	VP30_NT	SRPK2	A0A024R704	SRSF protein kinase 2(SRPK2)	VP30|SRPK2	58	14.5	1	19.17	145	0	ENSG00000135250	SRSF protein kinase 2(SRPK2)	6733	SRSF protein kinase 2(SRPK2)
VP30	VP30_NT	TCEB2	I3L0M9	transcription elongation factor B subunit 2(TCEB2)	VP30|TCEB2	11	2.75	0.97	2.52	22	0	ENSG00000103363	transcription elongation factor B subunit 2(TCEB2)	6923	transcription elongation factor B subunit 2(TCEB2)
VP30	VP30_NT	WIPF2	Q8TF74	WAS/WASL interacting protein family member 2(WIPF2)	VP30|WIPF2	132	33	1	38.44	330	0	ENSG00000171475	WAS/WASL interacting protein family member 2(WIPF2)	147179	WAS/WASL interacting protein family member 2(WIPF2)
VP30	VP30_NT	YEATS2	Q9ULM3	YEATS domain containing 2(YEATS2)	VP30|YEATS2	113	28.25	0.95	1.58	10.76	0.01	ENSG00000163872	YEATS domain containing 2(YEATS2)	55689	YEATS domain containing 2(YEATS2)
VP35	VP35_CT	CCDC138	Q96M89	coiled-coil domain containing 138(CCDC138)	VP35|CCDC138	66	16.5	0.75	-2.52	165	0	ENSG00000163006	coiled-coil domain containing 138(CCDC138)	165055	coiled-coil domain containing 138(CCDC138)
VP35	VP35_NT	CNOT10	Q9H9A5	CCR4-NOT transcription complex subunit 10(CNOT10)	VP35|CNOT10	23	5.75	0.75	-2.08	57.5	0.04	ENSG00000182973	CCR4-NOT transcription complex subunit 10(CNOT10)	25904	CCR4-NOT transcription complex subunit 10(CNOT10)
VP35	VP35_NT	CNOT11	Q9UKZ1	CCR4-NOT transcription complex subunit 11(CNOT11)	VP35|CNOT11	79	19.75	1	28.8	197.5	0	ENSG00000158435	CCR4-NOT transcription complex subunit 11(CNOT11)	55571	CCR4-NOT transcription complex subunit 11(CNOT11)
VP35	VP35_NT	DCP1A	A0A0S2Z5K3	decapping mRNA 1A(DCP1A)	VP35|DCP1A	189	47.25	0.75	-25.49	8.15	0.02	ENSG00000272886	decapping mRNA 1A(DCP1A)	55802	decapping mRNA 1A(DCP1A)
VP35	VP35_NT	DCP1B	Q8IZD4	decapping mRNA 1B(DCP1B)	VP35|DCP1B	259	64.75	1	35.04	259	0	ENSG00000151065	decapping mRNA 1B(DCP1B)	196513	decapping mRNA 1B(DCP1B)
VP35	VP35_NT	DCP2	Q8IU60	decapping mRNA 2(DCP2)	VP35|DCP2	117	29.25	1	43.46	292.5	0	ENSG00000172795	decapping mRNA 2(DCP2)	167227	decapping mRNA 2(DCP2)
VP35	VP35_NT	DDX6	P26196	DEAD-box helicase 6(DDX6)	VP35|DDX6	162	40.5	1	52.16	405	0	ENSG00000110367	DEAD-box helicase 6(DDX6)	1656	DEAD-box helicase 6(DDX6)
VP35	VP35_NT	DYNLL1	Q6FGH9	dynein light chain LC8-type 1(DYNLL1)	VP35|DYNLL1	137	34.25	1	42.01	342.5	0	ENSG00000088986	dynein light chain LC8-type 1(DYNLL1)	8655	dynein light chain LC8-type 1(DYNLL1)
VP35	VP35_NT	DYNLL2	Q96FJ2	dynein light chain LC8-type 2(DYNLL2)	VP35|DYNLL2	92	23	1	33.23	230	0	ENSG00000264364	dynein light chain LC8-type 2(DYNLL2)	140735	dynein light chain LC8-type 2(DYNLL2)
VP35	VP35_NT	EDC3	Q96F86	enhancer of mRNA decapping 3(EDC3)	VP35|EDC3	257	64.25	1	88.04	642.5	0	ENSG00000179151	enhancer of mRNA decapping 3(EDC3)	80153	enhancer of mRNA decapping 3(EDC3)
VP35	VP35_NT	EDC4	Q6P2E9	enhancer of mRNA decapping 4(EDC4)	VP35|EDC4	2273	568.25	1	7.86	11.28	0	ENSG00000038358	enhancer of mRNA decapping 4(EDC4)	23644	enhancer of mRNA decapping 4(EDC4)
VP35	VP35_NT	EIF4ENIF1	A0A024R1K0	eukaryotic translation initiation factor 4E nuclear import factor 1(EIF4ENIF1)	VP35|EIF4ENIF1	168	42	1	46.37	420	0	ENSG00000184708	eukaryotic translation initiation factor 4E nuclear import factor 1(EIF4ENIF1)	56478	eukaryotic translation initiation factor 4E nuclear import factor 1(EIF4ENIF1)
VP35	VP35_NT	FAM193A	A0A1B0GVL4	family with sequence similarity 193 member A(FAM193A)	VP35|FAM193A	47	11.75	1	16.76	117.5	0	ENSG00000125386	family with sequence similarity 193 member A(FAM193A)	8603	family with sequence similarity 193 member A(FAM193A)
VP35	VP35_NT	FAM193B	Q96PV7	family with sequence similarity 193 member B(FAM193B)	VP35|FAM193B	21	5.25	0.75	-2.08	52.5	0.05	ENSG00000146067	family with sequence similarity 193 member B(FAM193B)	54540	family with sequence similarity 193 member B(FAM193B)
VP35	VP35_NT	GAS8	O95995	growth arrest specific 8(GAS8)	VP35|GAS8	110	27.5	1	37.63	275	0	ENSG00000141013	growth arrest specific 8(GAS8)	2622	growth arrest specific 8(GAS8)
VP35	VP35_NT	GIGYF1	O75420	GRB10 interacting GYF protein 1(GIGYF1)	VP35|GIGYF1	48	12	1	15.21	120	0	ENSG00000146830	GRB10 interacting GYF protein 1(GIGYF1)	64599	GRB10 interacting GYF protein 1(GIGYF1)
VP35	VP35_NT	GPBP1	D4PHA4	GC-rich promoter binding protein 1(GPBP1)	VP35|GPBP1	22	5.5	0.75	-2.08	55	0.04	ENSG00000062194	GC-rich promoter binding protein 1(GPBP1)	65056	GC-rich promoter binding protein 1(GPBP1)
VP35	VP35_NT	IGF2BP2	F8W930	insulin like growth factor 2 mRNA binding protein 2(IGF2BP2)	VP35|IGF2BP2	172	43	1	6.51	21.5	0	ENSG00000073792	insulin like growth factor 2 mRNA binding protein 2(IGF2BP2)	10644	insulin like growth factor 2 mRNA binding protein 2(IGF2BP2)
VP35	VP35_NT	IGF2BP3	O00425	insulin like growth factor 2 mRNA binding protein 3(IGF2BP3)	VP35|IGF2BP3	68	17	1	19.81	170	0	ENSG00000136231	insulin like growth factor 2 mRNA binding protein 3(IGF2BP3)	10643	insulin like growth factor 2 mRNA binding protein 3(IGF2BP3)
VP35	VP35_NT	JCAD	Q9P266	junctional cadherin 5 associated	VP35|JCAD	177	44.25	1	60.82	442.5	0
VP35	VP35_NT	LSM14A	Q8ND56	LSM14A, mRNA processing body assembly factor(LSM14A)	VP35|LSM14A	95	23.75	1	33.23	237.5	0	ENSG00000257103	LSM14A, mRNA processing body assembly factor(LSM14A)	26065	LSM14A, mRNA processing body assembly factor(LSM14A)
VP35	VP35_NT	LSM14B	Q9BX40	LSM family member 14B(LSM14B)	VP35|LSM14B	69	17.25	1	4.96	23	0	ENSG00000149657	LSM family member 14B(LSM14B)	149986	LSM family member 14B(LSM14B)
VP35	VP35_NT	MEIOC	A2RUB1	meiosis specific with coiled-coil domain(MEIOC)	VP35|MEIOC	96	24	1	30.28	240	0	ENSG00000180336	meiosis specific with coiled-coil domain(MEIOC)	284071	meiosis specific with coiled-coil domain(MEIOC)
VP35	VP35_NT	MIB2	B4DEI6	E3 ubiquitin-protein ligase MIB2	VP35|MIB2	34	8.5	0.75	-2.08	85	0.03	ENSG00000197530	mindbomb E3 ubiquitin protein ligase 2(MIB2)	142678	mindbomb E3 ubiquitin protein ligase 2(MIB2)
VP35	VP35_NT	PATL1	Q86TB9	PAT1 homolog 1, processing body mRNA decay factor(PATL1)	VP35|PATL1	257	64.25	1	90.89	642.5	0	ENSG00000166889	PAT1 homolog 1, processing body mRNA decay factor(PATL1)	219988	PAT1 homolog 1, processing body mRNA decay factor(PATL1)
VP35	VP35_NT	PDLIM7	Q9NR12	PDZ and LIM domain 7(PDLIM7)	VP35|PDLIM7	23	5.75	1	8.83	57.5	0	ENSG00000196923	PDZ and LIM domain 7(PDLIM7)	9260	PDZ and LIM domain 7(PDLIM7)
VP35	VP35_NT	RC3H1	Q5TC82	ring finger and CCCH-type domains 1(RC3H1)	VP35|RC3H1	85	21.25	1	27.32	212.5	0	ENSG00000135870	ring finger and CCCH-type domains 1(RC3H1)	149041	ring finger and CCCH-type domains 1(RC3H1)
VP35	VP35_NT	RC3H2	A0A024R899	ring finger and CCCH-type domains 2(RC3H2)	VP35|RC3H2	74	18.5	1	22.84	185	0	ENSG00000056586	ring finger and CCCH-type domains 2(RC3H2)	54542	ring finger and CCCH-type domains 2(RC3H2)
VP35	VP35_NT	RNF214	A0A024R3D4	ring finger protein 214(RNF214)	VP35|RNF214	36	9	1	8.83	90	0	ENSG00000167257	ring finger protein 214(RNF214)	257160	ring finger protein 214(RNF214)
VP35	VP35_NT	SMG7	Q92540	SMG7, nonsense mediated mRNA decay factor(SMG7)	VP35|SMG7	204	51	1	6.26	29.14	0	ENSG00000116698	SMG7, nonsense mediated mRNA decay factor(SMG7)	9887	SMG7, nonsense mediated mRNA decay factor(SMG7)
VP35	VP35_NT	SPATA2	B3KN08	Spermatogenesis-associated protein 2	VP35|SPATA2	29	7.25	1	8.83	72.5	0	ENSG00000158480	spermatogenesis associated 2(SPATA2)	9825	spermatogenesis associated 2(SPATA2)
VP35	VP35_NT	TNRC6A	Q8NDV7-6	trinucleotide repeat containing 6A(TNRC6A)	VP35|TNRC6A	630	157.5	1	200.1	1575	0	ENSG00000090905	trinucleotide repeat containing 6A(TNRC6A)	27327	trinucleotide repeat containing 6A(TNRC6A)
VP35	VP35_NT	XRN1	Q8IZH2-2	5'-3' exoribonuclease 1(XRN1)	VP35|XRN1	877	219.25	1	7.93	38.13	0	ENSG00000114127	5'-3' exoribonuclease 1(XRN1)	54464	5'-3' exoribonuclease 1(XRN1)
VP35	VP35_NT	YTHDF1	B4DT65	YTH N6-methyladenosine RNA binding protein 1	VP35|YTHDF1	53	13.25	1	16.76	132.5	0	ENSG00000149658	YTH N6-methyladenosine RNA binding protein 1(YTHDF1)	54915	YTH N6-methyladenosine RNA binding protein 1(YTHDF1)
VP35	VP35_NT	ZMYM1	Q5SVZ6	zinc finger MYM-type containing 1(ZMYM1)	VP35|ZMYM1	193	48.25	1	62.26	482.5	0	ENSG00000197056	zinc finger MYM-type containing 1(ZMYM1)	79830	zinc finger MYM-type containing 1(ZMYM1)
VP40	VP40_NT	DSG2	Q14126	desmoglein 2(DSG2)	VP40|DSG2	263	65.75	1	5.68	9.39	0	ENSG00000046604	desmoglein 2(DSG2)	1829	desmoglein 2(DSG2)
VP40	VP40_NT	EPB41	P11171	erythrocyte membrane protein band 4.1(EPB41)	VP40|EPB41	101	25.25	0.98	3.17	15.54	0	ENSG00000159023	erythrocyte membrane protein band 4.1(EPB41)	2035	erythrocyte membrane protein band 4.1(EPB41)
VP40	VP40_CT	GPSM1	A0A0A0MRC4	G-protein signaling modulator 1(GPSM1)	VP40|GPSM1	91	22.75	0.75	-2.07	227.5	0.01	ENSG00000160360	G-protein signaling modulator 1(GPSM1)	26086	G-protein signaling modulator 1(GPSM1)
VP40	VP40_NT	LNPEP	B2RAK1	cDNA, FLJ94965, highly similar to Homo sapiens leucyl/cystinyl aminopeptidase (LNPEP), mRNA	VP40|LNPEP	58	14.5	1	19.48	145	0	ENSG00000113441	leucyl and cystinyl aminopeptidase(LNPEP)	4012	leucyl and cystinyl aminopeptidase(LNPEP)
VP40	VP40_NT	LTN1	O94822	listerin E3 ubiquitin protein ligase 1(LTN1)	VP40|LTN1	114	28.5	0.75	-2.17	285	0.03	ENSG00000198862	listerin E3 ubiquitin protein ligase 1(LTN1)	26046	listerin E3 ubiquitin protein ligase 1(LTN1)
VP40	VP40_NT	MON2	B7ZM73	MON2 homolog, regulator of endosome-to-Golgi trafficking(MON2)	VP40|MON2	44	11	1	14.88	110	0	ENSG00000061987	MON2 homolog, regulator of endosome-to-Golgi trafficking(MON2)	23041	MON2 homolog, regulator of endosome-to-Golgi trafficking(MON2)
VP40	VP40_NT	NECTIN2	Q92692	nectin cell adhesion molecule 2(NECTIN2)	VP40|NECTIN2	100	25	1	5.12	28.57	0	ENSG00000130202	nectin cell adhesion molecule 2(NECTIN2)	5819	nectin cell adhesion molecule 2(NECTIN2)
VP40	VP40_NT	NOTCH2	Q04721	notch 2(NOTCH2)	VP40|NOTCH2	317	79.25	1	71.97	792.5	0	ENSG00000134250	notch 2(NOTCH2)	4853	notch 2(NOTCH2)
VP40	VP40_NT	PDCD11	Q14690	programmed cell death 11(PDCD11)	VP40|PDCD11	57	14.25	1	21	142.5	0	ENSG00000148843	programmed cell death 11(PDCD11)	22984	programmed cell death 11(PDCD11)
VP40	VP40_NT	PPM1B	O75688	protein phosphatase, Mg2+/Mn2+ dependent 1B(PPM1B)	VP40|PPM1B	104	26	1	37.3	260	0	ENSG00000138032	protein phosphatase, Mg2+/Mn2+ dependent 1B(PPM1B)	5495	protein phosphatase, Mg2+/Mn2+ dependent 1B(PPM1B)
VP40	VP40_NT	PPP6R3	E9PKF6	protein phosphatase 6 regulatory subunit 3(PPP6R3)	VP40|PPP6R3	66	16.5	0.75	-2.17	165	0.05	ENSG00000110075	protein phosphatase 6 regulatory subunit 3(PPP6R3)	55291	protein phosphatase 6 regulatory subunit 3(PPP6R3)
VP40	VP40_NT	PTPN14	A8K6H6	protein tyrosine phosphatase, non-receptor type 14(PTPN14)	VP40|PTPN14	45	11.25	1	16.43	112.5	0	ENSG00000152104	protein tyrosine phosphatase, non-receptor type 14(PTPN14)	5784	protein tyrosine phosphatase, non-receptor type 14(PTPN14)
VP40	VP40_NT	RAB11FIP1	Q6WKZ4	RAB11 family interacting protein 1(RAB11FIP1)	VP40|RAB11FIP1	53	13.25	0.79	0.88	6.31	0.02	ENSG00000156675	RAB11 family interacting protein 1(RAB11FIP1)	80223	RAB11 family interacting protein 1(RAB11FIP1)
VP40	VP40_NT	RASAL2	Q9UJF2-2	RAS protein activator like 2(RASAL2)	VP40|RASAL2	67	16.75	1	17.96	167.5	0	ENSG00000075391	RAS protein activator like 2(RASAL2)	9462	RAS protein activator like 2(RASAL2)
VP40	VP40_NT	SET	A0A024R895	SET nuclear proto-oncogene(SET)	VP40|SET	29	7.25	0.96	2.49	14.5	0	ENSG00000119335	SET nuclear proto-oncogene(SET)	6418	SET nuclear proto-oncogene(SET)
VP40	VP40_NT	SLC38A2	A0A024R0W3	solute carrier family 38 member 2(SLC38A2)	VP40|SLC38A2	15	3.75	1	5.07	37.5	0	ENSG00000134294	solute carrier family 38 member 2(SLC38A2)	54407	solute carrier family 38 member 2(SLC38A2)
VP40	VP40_NT	SMCR8	Q8TEV9	Smith-Magenis syndrome chromosome region, candidate 8(SMCR8)	VP40|SMCR8	135	33.75	1	46.04	337.5	0	ENSG00000176994	Smith-Magenis syndrome chromosome region, candidate 8(SMCR8)	140775	Smith-Magenis syndrome chromosome region, candidate 8(SMCR8)
VP40	VP40_NT	SORT1	Q99523-2	sortilin 1(SORT1)	VP40|SORT1	31	7.75	1	10.13	77.5	0	ENSG00000134243	sortilin 1(SORT1)	6272	sortilin 1(SORT1)
VP40	VP40_NT	TBC1D15	Q8TC07	TBC1 domain family member 15(TBC1D15)	VP40|TBC1D15	55	13.75	0.97	3.15	12.22	0	ENSG00000121749	TBC1 domain family member 15(TBC1D15)	64786	TBC1 domain family member 15(TBC1D15)
VP40	VP40_NT	UBAP1	A0A0D9SG79	ubiquitin associated protein 1(UBAP1)	VP40|UBAP1	16	4	1	5.07	40	0	ENSG00000165006	ubiquitin associated protein 1(UBAP1)	51271	ubiquitin associated protein 1(UBAP1)
VP40	VP40_NT	USP6NL	X6RAB3	USP6 N-terminal like(USP6NL)	VP40|USP6NL	101	25.25	1	35.84	252.5	0	ENSG00000148429	USP6 N-terminal like(USP6NL)	9712	USP6 N-terminal like(USP6NL)

## Sheet: BioID by Viral construct vs All
Bait	Bait Construct	Prey	UniProtID	Gene Name	Protein Interaction ID	Construct Interaction ID	SpecSum	AvgSpec	Saint Score	log Odds Score	Fold Change	BFDR	Ensembl Gene ID	Ensembl Gene description	NCBI Entrez Gene	NCBI Entrez Gene descriptiion
L	L_NT	HSPA8	B3KTV0	highly similar to HEAT SHOCK COGNATE 71 kDa PROTEIN	L|HSPA8	L_NT|HSPA8	45	11.25	0.5	-2.84	112.5	0	ENSG00000109971	heat shock protein family A (Hsp70) member 8(HSPA8)	3312	heat shock protein family A (Hsp70) member 8(HSPA8)
NP	NP_CT	ABL2	P42684	ABL proto-oncogene 2, non-receptor tyrosine kinase(ABL2)	NP|ABL2	NP_CT|ABL2	100	25	1	36.33	250	0	ENSG00000143322	ABL proto-oncogene 2, non-receptor tyrosine kinase(ABL2)	27	ABL proto-oncogene 2, non-receptor tyrosine kinase(ABL2)
NP	NP_CT	AHNAK2	Q8IVF2	AHNAK nucleoprotein 2(AHNAK2)	NP|AHNAK2	NP_CT|AHNAK2	530	132.5	1	174.82	1325	0	ENSG00000185567	AHNAK nucleoprotein 2(AHNAK2)	113146	AHNAK nucleoprotein 2(AHNAK2)
NP	NP_CT	ARHGAP29	Q52LW3	Rho GTPase activating protein 29(ARHGAP29)	NP|ARHGAP29	NP_CT|ARHGAP29	94	23.5	1	30.45	235	0	ENSG00000137962	Rho GTPase activating protein 29(ARHGAP29)	9411	Rho GTPase activating protein 29(ARHGAP29)
NP	NP_CT	ARHGEF16	B3KTS4	Rho guanine nucleotide exchange factor 16(ARHGEF16)	NP|ARHGEF16	NP_CT|ARHGEF16	65	16.25	1	21.5	162.5	0	ENSG00000130762	Rho guanine nucleotide exchange factor 16(ARHGEF16)	27237	Rho guanine nucleotide exchange factor 16(ARHGEF16)
NP	NP_CT	B6E4X6	B6E4X6	Cellular tumor antigen p53	NP|B6E4X6	NP_CT|B6E4X6	291	72.75	1	105.89	727.5	0
NP	NP_CT	C16ORF70	A0A024R6W4	chromosome 16 open reading frame 70(C16orf70)	NP|C16ORF70	NP_CT|C16ORF70	15	3.75	1	5.57	37.5	0	ENSG00000125149	chromosome 16 open reading frame 70(C16orf70)	80262	chromosome 16 open reading frame 70(C16orf70)
NP	NP_CT	C1ORF198	A0A024R3S1	chromosome 1 open reading frame 198(C1orf198)	NP|C1ORF198	NP_CT|C1ORF198	29	7.25	1	10.63	72.5	0	ENSG00000119280	chromosome 1 open reading frame 198(C1orf198)	84886	chromosome 1 open reading frame 198(C1orf198)
NP	NP_CT	C6ORF132	Q5T0Z8	chromosome 6 open reading frame 132(C6orf132)	NP|C6ORF132	NP_CT|C6ORF132	64	16	1	21.5	160	0	ENSG00000188112	chromosome 6 open reading frame 132(C6orf132)	647024	chromosome 6 open reading frame 132(C6orf132)
NP	NP_CT	CAMSAP2	Q08AD1	calmodulin regulated spectrin associated protein family member 2(CAMSAP2)	NP|CAMSAP2	NP_CT|CAMSAP2	161	40.25	1	56.66	402.5	0	ENSG00000118200	calmodulin regulated spectrin associated protein family member 2(CAMSAP2)	23271	calmodulin regulated spectrin associated protein family member 2(CAMSAP2)
NP	NP_CT	CAMSAP3	Q9P1Y5	calmodulin regulated spectrin associated protein family member 3(CAMSAP3)	NP|CAMSAP3	NP_CT|CAMSAP3	322	80.5	0.96	2.38	4.88	0	ENSG00000076826	calmodulin regulated spectrin associated protein family member 3(CAMSAP3)	57662	calmodulin regulated spectrin associated protein family member 3(CAMSAP3)
NP	NP_CT	CASC5	Q05C46	CASC5 protein	NP|CASC5	NP_CT|CASC5	97	24.25	0.96	3	5.88	0
NP	NP_CT	CEP170B	J3KQR7	centrosomal protein 170B(CEP170B)	NP|CEP170B	NP_CT|CEP170B	62	15.5	0.75	-1.66	155	0.05	ENSG00000099814	centrosomal protein 170B(CEP170B)	283638	centrosomal protein 170B(CEP170B)
NP	NP_CT	CEP350	Q5VT06	centrosomal protein 350(CEP350)	NP|CEP350	NP_CT|CEP350	79	19.75	0.75	-1.66	197.5	0.05	ENSG00000135837	centrosomal protein 350(CEP350)	9857	centrosomal protein 350(CEP350)
NP	NP_CT	CEP85L	Q5SZL2	centrosomal protein 85 like(CEP85L)	NP|CEP85L	NP_CT|CEP85L	87	21.75	1	27.49	217.5	0	ENSG00000111860	centrosomal protein 85 like(CEP85L)	387119	centrosomal protein 85 like(CEP85L)
NP	NP_CT	CGNL1	Q0VF96	cingulin like 1(CGNL1)	NP|CGNL1	NP_CT|CGNL1	496	124	1	170.57	1240	0	ENSG00000128849	cingulin like 1(CGNL1)	84952	cingulin like 1(CGNL1)
NP	NP_CT	CP110	A0A024QYV8	CP110 protein, isoform CRA_a	NP|CP110	NP_CT|CP110	198	49.5	1	5.14	9.66	0
NP	NP_CT	CSPP1	Q1MSJ5	centrosome and spindle pole associated protein 1(CSPP1)	NP|CSPP1	NP_CT|CSPP1	157	39.25	1	56.66	392.5	0	ENSG00000104218	centrosome and spindle pole associated protein 1(CSPP1)	79848	centrosome and spindle pole associated protein 1(CSPP1)
NP	NP_CT	DIP2B	Q9P265	disco interacting protein 2 homolog B(DIP2B)	NP|DIP2B	NP_CT|DIP2B	57	14.25	1	16.93	142.5	0	ENSG00000066084	disco interacting protein 2 homolog B(DIP2B)	57609	disco interacting protein 2 homolog B(DIP2B)
NP	NP_CT	DZIP3	Q86Y13	DAZ interacting zinc finger protein 3(DZIP3)	NP|DZIP3	NP_CT|DZIP3	72	18	1	21.5	180	0	ENSG00000198919	DAZ interacting zinc finger protein 3(DZIP3)	9666	DAZ interacting zinc finger protein 3(DZIP3)
NP	NP_CT	EGLN1	R4RZ18	egl-9 family hypoxia inducible factor 1(EGLN1)	NP|EGLN1	NP_CT|EGLN1	336	84	0.99	4.66	8.1	0	ENSG00000135766	egl-9 family hypoxia inducible factor 1(EGLN1)	54583	egl-9 family hypoxia inducible factor 1(EGLN1)
NP	NP_CT	FAM188B	Q4G0A6	family with sequence similarity 188 member B(FAM188B)	NP|FAM188B	NP_CT|FAM188B	40	10	1	15.38	100	0	ENSG00000106125	family with sequence similarity 188 member B(FAM188B)	84182	family with sequence similarity 188 member B(FAM188B)
NP	NP_CT	FAM83G	A6ND36	family with sequence similarity 83 member G(FAM83G)	NP|FAM83G	NP_CT|FAM83G	42	10.5	1	15.38	105	0	ENSG00000188522	family with sequence similarity 83 member G(FAM83G)	644815	family with sequence similarity 83 member G(FAM83G)
NP	NP_CT	GEN1	Q17RS7	GEN1, Holliday junction 5' flap endonuclease(GEN1)	NP|GEN1	NP_CT|GEN1	95	23.75	1	34.87	237.5	0	ENSG00000178295	GEN1, Holliday junction 5' flap endonuclease(GEN1)	348654	GEN1, Holliday junction 5' flap endonuclease(GEN1)
NP	NP_CT	GIT1	Q9Y2X7	GIT ArfGAP 1(GIT1)	NP|GIT1	NP_CT|GIT1	174	43.5	1	50.88	435	0	ENSG00000108262	GIT ArfGAP 1(GIT1)	28964	GIT ArfGAP 1(GIT1)
NP	NP_CT	HAUS8	Q9BT25	HAUS augmin like complex subunit 8(HAUS8)	NP|HAUS8	NP_CT|HAUS8	35	8.75	1	12.24	87.5	0	ENSG00000131351	HAUS augmin like complex subunit 8(HAUS8)	93323	HAUS augmin like complex subunit 8(HAUS8)
NP	NP_CT	IFT74	A0PJM7	intraflagellar transport 74(IFT74)	NP|IFT74	NP_CT|IFT74	338	84.5	0.99	4.2	7.51	0	ENSG00000096872	intraflagellar transport 74(IFT74)	80173	intraflagellar transport 74(IFT74)
NP	NP_CT	INPPL1	O15357	inositol polyphosphate phosphatase like 1(INPPL1)	NP|INPPL1	NP_CT|INPPL1	58	14.5	1	21.5	145	0	ENSG00000165458	inositol polyphosphate phosphatase like 1(INPPL1)	3636	inositol polyphosphate phosphatase like 1(INPPL1)
NP	NP_CT	KATNB1	Q9BVA0	katanin regulatory subunit B1(KATNB1)	NP|KATNB1	NP_CT|KATNB1	20	5	0.99	3.8	20	0	ENSG00000140854	katanin regulatory subunit B1(KATNB1)	10300	katanin regulatory subunit B1(KATNB1)
NP	NP_CT	KIAA0368	J3KN16	KIAA0368(KIAA0368)	NP|KIAA0368	NP_CT|KIAA0368	145	36.25	0.98	3.55	8.53	0	ENSG00000136813	KIAA0368(KIAA0368)	23392	KIAA0368(KIAA0368)
NP	NP_CT	KIAA1217	Q5T5P2	KIAA1217(KIAA1217)	NP|KIAA1217	NP_CT|KIAA1217	206	51.5	1	63.86	515	0	ENSG00000120549	KIAA1217(KIAA1217)	56243	KIAA1217(KIAA1217)
NP	NP_CT	LMO7	B7Z8W3	cDNA FLJ53272, highly similar to Homo sapiens LIM domain 7 (LMO7), mRNA	NP|LMO7	NP_CT|LMO7	56	14	1	18.46	140	0	ENSG00000136153	LIM domain 7(LMO7)	4008	LIM domain 7(LMO7)
NP	NP_CT	MAP7D3	Q8IWC1	MAP7 domain containing 3(MAP7D3)	NP|MAP7D3	NP_CT|MAP7D3	258	64.5	1	93.91	645	0	ENSG00000129680	MAP7 domain containing 3(MAP7D3)	79649	MAP7 domain containing 3(MAP7D3)
NP	NP_CT	MIS18BP1	Q6P0N0	MIS18 binding protein 1(MIS18BP1)	NP|MIS18BP1	NP_CT|MIS18BP1	68	17	1	23	170	0	ENSG00000129534	MIS18 binding protein 1(MIS18BP1)	55320	MIS18 binding protein 1(MIS18BP1)
NP	NP_CT	MTHFD1	B7Z809	C-1-tetrahydrofolate synthase, cytoplasmic	NP|MTHFD1	NP_CT|MTHFD1	60	15	1	21.5	150	0	ENSG00000100714	methylenetetrahydrofolate dehydrogenase, cyclohydrolase and formyltetrahydrofolate synthetase 1(MTHFD1)	4522	methylenetetrahydrofolate dehydrogenase, cyclohydrolase and formyltetrahydrofolate synthetase 1(MTHFD1)
NP	NP_CT	MTUS1	Q9ULD2	microtubule associated tumor suppressor 1(MTUS1)	NP|MTUS1	NP_CT|MTUS1	58	14.5	0.75	-1.66	145	0.05	ENSG00000129422	microtubule associated tumor suppressor 1(MTUS1)	57509	microtubule associated tumor suppressor 1(MTUS1)
NP	NP_CT	NAV1	Q8NEY1	neuron navigator 1(NAV1)	NP|NAV1	NP_CT|NAV1	269	67.25	1	86.78	672.5	0	ENSG00000134369	neuron navigator 1(NAV1)	89796	neuron navigator 1(NAV1)
NP	NP_CT	NCKAP5L	Q9HCH0	NCK associated protein 5 like(NCKAP5L)	NP|NCKAP5L	NP_CT|NCKAP5L	104	26	1	34.87	260	0	ENSG00000167566	NCK associated protein 5 like(NCKAP5L)	57701	NCK associated protein 5 like(NCKAP5L)
NP	NP_CT	NEDD1	A0A024RBE5	neural precursor cell expressed, developmentally down-regulated 1(NEDD1)	NP|NEDD1	NP_CT|NEDD1	346	86.5	1	14.06	98.86	0	ENSG00000139350	neural precursor cell expressed, developmentally down-regulated 1(NEDD1)	121441	neural precursor cell expressed, developmentally down-regulated 1(NEDD1)
NP	NP_CT	NFRKB	A0A024R3K9	nuclear factor related to kappaB binding protein(NFRKB)	NP|NFRKB	NP_CT|NFRKB	84	21	1	28.97	210	0	ENSG00000170322	nuclear factor related to kappaB binding protein(NFRKB)	4798	nuclear factor related to kappaB binding protein(NFRKB)
NP	NP_CT	NPAT	B9EG70	nuclear protein, coactivator of histone transcription(NPAT)	NP|NPAT	NP_CT|NPAT	129	32.25	0.75	-1.66	322.5	0.03	ENSG00000149308	nuclear protein, coactivator of histone transcription(NPAT)	4863	nuclear protein, coactivator of histone transcription(NPAT)
NP	NP_CT	PDLIM5	B7Z481	PDZ and LIM domain 5(PDLIM5)	NP|PDLIM5	NP_CT|PDLIM5	88	22	1	31.93	220	0	ENSG00000163110	PDZ and LIM domain 5(PDLIM5)	10611	PDZ and LIM domain 5(PDLIM5)
NP	NP_CT	PEAK1	Q9H792	pseudopodium enriched atypical kinase 1(PEAK1)	NP|PEAK1	NP_CT|PEAK1	89	22.25	1	30.45	222.5	0	ENSG00000173517	pseudopodium enriched atypical kinase 1(PEAK1)	79834	pseudopodium enriched atypical kinase 1(PEAK1)
NP	NP_CT	PIK3C2A	L7RRS0	phosphatidylinositol-4-phosphate 3-kinase catalytic subunit type 2 alpha(PIK3C2A)	NP|PIK3C2A	NP_CT|PIK3C2A	139	34.75	1	47.99	347.5	0	ENSG00000011405	phosphatidylinositol-4-phosphate 3-kinase catalytic subunit type 2 alpha(PIK3C2A)	5286	phosphatidylinositol-4-phosphate 3-kinase catalytic subunit type 2 alpha(PIK3C2A)
NP	NP_CT	PLEKHG1	Q5JYA6	pleckstrin homology and RhoGEF domain containing G1(PLEKHG1)	NP|PLEKHG1	NP_CT|PLEKHG1	108	27	1	37.8	270	0	ENSG00000120278	pleckstrin homology and RhoGEF domain containing G1(PLEKHG1)	57480	pleckstrin homology and RhoGEF domain containing G1(PLEKHG1)
NP	NP_CT	POC5	Q8NA72	POC5 centriolar protein(POC5)	NP|POC5	NP_CT|POC5	312	78	1	111	780	0	ENSG00000152359	POC5 centriolar protein(POC5)	134359	POC5 centriolar protein(POC5)
NP	NP_CT	PPM1A	P35813-3	protein phosphatase, Mg2+/Mn2+ dependent 1A(PPM1A)	NP|PPM1A	NP_CT|PPM1A	46	11.5	0.97	2.53	10.22	0	ENSG00000100614	protein phosphatase, Mg2+/Mn2+ dependent 1A(PPM1A)	5494	protein phosphatase, Mg2+/Mn2+ dependent 1A(PPM1A)
NP	NP_CT	PPP2R5C	Q13362	protein phosphatase 2 regulatory subunit B'gamma(PPP2R5C)	NP|PPP2R5C	NP_CT|PPP2R5C	285	71.25	1	95.34	712.5	0	ENSG00000078304	protein phosphatase 2 regulatory subunit B'gamma(PPP2R5C)	5527	protein phosphatase 2 regulatory subunit B'gamma(PPP2R5C)
NP	NP_CT	PPP2R5C	Q13362-4	protein phosphatase 2 regulatory subunit B'gamma(PPP2R5C)	NP|PPP2R5C	NP_CT|PPP2R5C	277	69.25	1	93.91	692.5	0	ENSG00000078304	protein phosphatase 2 regulatory subunit B'gamma(PPP2R5C)	5527	protein phosphatase 2 regulatory subunit B'gamma(PPP2R5C)
NP	NP_CT	PPP2R5D	A0A024RD11	protein phosphatase 2 regulatory subunit B'delta(PPP2R5D)	NP|PPP2R5D	NP_CT|PPP2R5D	376	94	1	15.3	125.33	0	ENSG00000112640	protein phosphatase 2 regulatory subunit B'delta(PPP2R5D)	5528	protein phosphatase 2 regulatory subunit B'delta(PPP2R5D)
NP	NP_CT	RPS2	Q3KQT6	ribosomal protein S2(RPS2)	NP|RPS2	NP_CT|RPS2	53	13.25	1	15.38	132.5	0	ENSG00000140988	ribosomal protein S2(RPS2)	6187	ribosomal protein S2(RPS2)
NP	NP_CT	SDCCAG3	Q96C92	serologically defined colon cancer antigen 3(SDCCAG3)	NP|SDCCAG3	NP_CT|SDCCAG3	73	18.25	1	26	182.5	0	ENSG00000165689	serologically defined colon cancer antigen 3(SDCCAG3)	10807	serologically defined colon cancer antigen 3(SDCCAG3)
NP	NP_CT	SECISBP2	B4DZC7	SECIS binding protein 2(SECISBP2)	NP|SECISBP2	NP_CT|SECISBP2	85	21.25	0.75	-1.66	212.5	0.04	ENSG00000187742	SECIS binding protein 2(SECISBP2)	79048	SECIS binding protein 2(SECISBP2)
NP	NP_CT	SEPT	Q9UHD8	septin 9(SEPT9)	NP|SEPT	NP_CT|SEPT	46	11.5	1	16.08	115	0
NP	NP_CT	SH3PXD2B	A1X283	SH3 and PX domains 2B(SH3PXD2B)	NP|SH3PXD2B	NP_CT|SH3PXD2B	33	8.25	1	13.82	82.5	0	ENSG00000174705	SH3 and PX domains 2B(SH3PXD2B)	285590	SH3 and PX domains 2B(SH3PXD2B)
NP	NP_CT	SIPA1L1	O43166-2	signal induced proliferation associated 1 like 1(SIPA1L1)	NP|SIPA1L1	NP_CT|SIPA1L1	211	52.75	0.75	-1.66	527.5	0.03	ENSG00000197555	signal induced proliferation associated 1 like 1(SIPA1L1)	26037	signal induced proliferation associated 1 like 1(SIPA1L1)
NP	NP_CT	SIPA1L2	Q9P2F8	signal induced proliferation associated 1 like 2(SIPA1L2)	NP|SIPA1L2	NP_CT|SIPA1L2	68	17	1	24.5	170	0	ENSG00000116991	signal induced proliferation associated 1 like 2(SIPA1L2)	57568	signal induced proliferation associated 1 like 2(SIPA1L2)
NP	NP_CT	SKA1	A0A024R294	spindle and kinetochore associated complex subunit 1(SKA1)	NP|SKA1	NP_CT|SKA1	30	7.5	1	8.99	75	0	ENSG00000154839	spindle and kinetochore associated complex subunit 1(SKA1)	220134	spindle and kinetochore associated complex subunit 1(SKA1)
NP	NP_CT	SVIL	O95425-4	supervillin(SVIL)	NP|SVIL	NP_CT|SVIL	141	35.25	0.75	-1.66	352.5	0.03	ENSG00000197321	supervillin(SVIL)	6840	supervillin(SVIL)
NP	NP_CT	SYNJ2	O15056	synaptojanin 2(SYNJ2)	NP|SYNJ2	NP_CT|SYNJ2	130	32.5	1	45.09	325	0	ENSG00000078269	synaptojanin 2(SYNJ2)	8871	synaptojanin 2(SYNJ2)
NP	NP_CT	TAB3	Q8N5C8	TGF-beta activated kinase 1/MAP3K7 binding protein 3(TAB3)	NP|TAB3	NP_CT|TAB3	40	10	1	12.24	100	0	ENSG00000157625	TGF-beta activated kinase 1/MAP3K7 binding protein 3(TAB3)	257397	TGF-beta activated kinase 1/MAP3K7 binding protein 3(TAB3)
NP	NP_CT	TANC1	Q9C0D5	tetratricopeptide repeat, ankyrin repeat and coiled-coil containing 1(TANC1)	NP|TANC1	NP_CT|TANC1	496	124	1	10.23	70.86	0	ENSG00000115183	tetratricopeptide repeat, ankyrin repeat and coiled-coil containing 1(TANC1)	85461	tetratricopeptide repeat, ankyrin repeat and coiled-coil containing 1(TANC1)
NP	NP_CT	TP53	E5RMA8	tumor protein p53(TP53)	NP|TP53	NP_CT|TP53	312	78	1	9.03	28.36	0	ENSG00000141510	tumor protein p53(TP53)	7157	tumor protein p53(TP53)
NP	NP_CT	TP53	B6E4X6	Cellular tumor antigen p53	NP|TP53	NP_CT|TP53	291	72.75	1	106.73	727.5	0	ENSG00000141510	tumor protein p53(TP53)	7157	tumor protein p53(TP53)
NP	NP_CT	TRIM25	Q59GW5	Tripartite motif-containing 25 variant	NP|TRIM25	NP_CT|TRIM25	250	62.5	0.99	4.54	10.64	0			7706	tripartite motif containing 25(TRIM25)
NP	NP_CT	TTF2	A0A024R0F1	transcription termination factor 2(TTF2)	NP|TTF2	NP_CT|TTF2	474	118.5	1	6.15	11.15	0	ENSG00000116830	transcription termination factor 2(TTF2)	8458	transcription termination factor 2(TTF2)
NP	NP_CT	TUBGCP2	Q9BSJ2	tubulin gamma complex associated protein 2(TUBGCP2)	NP|TUBGCP2	NP_CT|TUBGCP2	128	32	1	40.72	320	0	ENSG00000130640	tubulin gamma complex associated protein 2(TUBGCP2)	10844	tubulin gamma complex associated protein 2(TUBGCP2)
NP	NP_CT	TUBGCP3	Q96CW5	tubulin gamma complex associated protein 3(TUBGCP3)	NP|TUBGCP3	NP_CT|TUBGCP3	67	16.75	1	24.5	167.5	0	ENSG00000126216	tubulin gamma complex associated protein 3(TUBGCP3)	10426	tubulin gamma complex associated protein 3(TUBGCP3)
NP	NP_CT	TUBGCP4	Q9UGJ1	tubulin gamma complex associated protein 4(TUBGCP4)	NP|TUBGCP4	NP_CT|TUBGCP4	61	15.25	1	16.93	152.5	0	ENSG00000137822	tubulin gamma complex associated protein 4(TUBGCP4)	27229	tubulin gamma complex associated protein 4(TUBGCP4)
NP	NP_CT	TUFT1	B7Z4Y1	tuftelin 1(TUFT1)	NP|TUFT1	NP_CT|TUFT1	46	11.5	1	13.82	115	0	ENSG00000143367	tuftelin 1(TUFT1)	7286	tuftelin 1(TUFT1)
NP	NP_CT	UBN2	Q6ZU65	ubinuclein 2(UBN2)	NP|UBN2	NP_CT|UBN2	114	28.5	1	40.72	285	0	ENSG00000157741	ubinuclein 2(UBN2)	254048	ubinuclein 2(UBN2)
NP	NP_CT	USP53	Q70EK8	ubiquitin specific peptidase 53(USP53)	NP|USP53	NP_CT|USP53	59	14.75	1	18.46	147.5	0	ENSG00000145390	ubiquitin specific peptidase 53(USP53)	54532	ubiquitin specific peptidase 53(USP53)
NP	NP_CT	ZC3H7A	Q8IWR0	zinc finger CCCH-type containing 7A(ZC3H7A)	NP|ZC3H7A	NP_CT|ZC3H7A	66	16.5	1	21.5	165	0	ENSG00000122299	zinc finger CCCH-type containing 7A(ZC3H7A)	29066	zinc finger CCCH-type containing 7A(ZC3H7A)
NP	NP_NT	AP1G1	A0A140VJE7	adaptor related protein complex 1 gamma 1 subunit(AP1G1)	NP|AP1G1	NP_NT|AP1G1	71	17.75	1	19.8	177.5	0	ENSG00000166747	adaptor related protein complex 1 gamma 1 subunit(AP1G1)	164	adaptor related protein complex 1 gamma 1 subunit(AP1G1)
NP	NP_NT	ATP6V1A	P38606-2	ATPase H+ transporting V1 subunit A(ATP6V1A)	NP|ATP6V1A	NP_NT|ATP6V1A	129	32.25	0.99	4	18.43	0	ENSG00000114573	ATPase H+ transporting V1 subunit A(ATP6V1A)	523	ATPase H+ transporting V1 subunit A(ATP6V1A)
NP	NP_NT	BACH1	O14867	BTB domain and CNC homolog 1(BACH1)	NP|BACH1	NP_NT|BACH1	109	27.25	0.99	5.07	19.82	0			571	BTB domain and CNC homolog 1(BACH1)
NP	NP_NT	COBL	O75128	cordon-bleu WH2 repeat protein(COBL)	NP|COBL	NP_NT|COBL	233	58.25	1	80.88	582.5	0	ENSG00000106078	cordon-bleu WH2 repeat protein(COBL)	23242	cordon-bleu WH2 repeat protein(COBL)
NP	NP_NT	CPNE5	Q9HCH3	copine 5(CPNE5)	NP|CPNE5	NP_NT|CPNE5	36	9	0.95	2.73	9	0.01	ENSG00000124772	copine 5(CPNE5)	57699	copine 5(CPNE5)
NP	NP_NT	FAM117B	Q6P1L5	family with sequence similarity 117 member B(FAM117B)	NP|FAM117B	NP_NT|FAM117B	30	7.5	0.93	1.86	8.57	0.01	ENSG00000138439	family with sequence similarity 117 member B(FAM117B)	150864	family with sequence similarity 117 member B(FAM117B)
NP	NP_NT	GNE	Q6QNY5	glucosamine (UDP-N-acetyl)-2-epimerase/N-acetylmannosamine kinase(GNE)	NP|GNE	NP_NT|GNE	46	11.5	1	16.74	115	0	ENSG00000159921	glucosamine (UDP-N-acetyl)-2-epimerase/N-acetylmannosamine kinase(GNE)	10020	glucosamine (UDP-N-acetyl)-2-epimerase/N-acetylmannosamine kinase(GNE)
NP	NP_NT	KNL1	Q8NG31	kinetochore scaffold 1(KNL1)	NP|KNL1	NP_NT|KNL1	440	110	0.99	4.46	7.52	0	ENSG00000137812	kinetochore scaffold 1(KNL1)	57082	kinetochore scaffold 1(KNL1)
NP	NP_NT	MSN	V9HWC0	moesin(MSN)	NP|MSN	NP_NT|MSN	50	12.5	1	18.28	125	0	ENSG00000147065	moesin(MSN)	4478	moesin(MSN)
NP	NP_NT	NMT1	Q96HI4	N-myristoyltransferase 1(NMT1)	NP|NMT1	NP_NT|NMT1	23	5.75	1	7.13	57.5	0	ENSG00000136448	N-myristoyltransferase 1(NMT1)	4836	N-myristoyltransferase 1(NMT1)
NP	NP_NT	POLR3D	P05423	RNA polymerase III subunit D(POLR3D)	NP|POLR3D	NP_NT|POLR3D	37	9.25	1	10.45	92.5	0	ENSG00000168495	RNA polymerase III subunit D(POLR3D)	661	RNA polymerase III subunit D(POLR3D)
NP	NP_NT	PPP2R2A	A0A140VJT0	protein phosphatase 2 regulatory subunit Balpha(PPP2R2A)	NP|PPP2R2A	NP_NT|PPP2R2A	25	6.25	1	8.81	62.5	0	ENSG00000221914	protein phosphatase 2 regulatory subunit Balpha(PPP2R2A)	5520	protein phosphatase 2 regulatory subunit Balpha(PPP2R2A)
NP	NP_NT	RBBP4	Q09028	RB binding protein 4, chromatin remodeling factor(RBBP4)	NP|RBBP4	NP_NT|RBBP4	114	28.5	1	40.54	285	0	ENSG00000162521	RB binding protein 4, chromatin remodeling factor(RBBP4)	5928	RB binding protein 4, chromatin remodeling factor(RBBP4)
NP	NP_NT	RBBP7	Q6FHQ0	RB binding protein 7, chromatin remodeling factor(RBBP7)	NP|RBBP7	NP_NT|RBBP7	225	56.25	1	79.45	562.5	0	ENSG00000102054	RB binding protein 7, chromatin remodeling factor(RBBP7)	5931	RB binding protein 7, chromatin remodeling factor(RBBP7)
NP	NP_NT	RPL17	A0A024R261	ribosomal protein L17(RPL17)	NP|RPL17	NP_NT|RPL17	43	10.75	1	16.74	107.5	0	ENSG00000265681	ribosomal protein L17(RPL17)	6139	ribosomal protein L17(RPL17)
NP	NP_NT	RPS10	P46783	ribosomal protein S10(RPS10)	NP|RPS10	NP_NT|RPS10	42	10.5	1	15.2	105	0	ENSG00000124614	ribosomal protein S10(RPS10)	6204	ribosomal protein S10(RPS10)
NP	NP_NT	RPS12	P25398	ribosomal protein S12(RPS12)	NP|RPS12	NP_NT|RPS12	35	8.75	1	10.45	87.5	0	ENSG00000112306	ribosomal protein S12(RPS12)	6206	ribosomal protein S12(RPS12)
NP	NP_NT	RPS14	P62263	ribosomal protein S14(RPS14)	NP|RPS14	NP_NT|RPS14	34	8.5	1	12.05	85	0	ENSG00000164587	ribosomal protein S14(RPS14)	6208	ribosomal protein S14(RPS14)
NP	NP_NT	RPS20	P60866	ribosomal protein S20(RPS20)	NP|RPS20	NP_NT|RPS20	33	8.25	1	10.45	82.5	0	ENSG00000008988	ribosomal protein S20(RPS20)	6224	ribosomal protein S20(RPS20)
NP	NP_NT	RPS27	Q5T4L4	ribosomal protein S27(RPS27)	NP|RPS27	NP_NT|RPS27	37	9.25	1	10.45	92.5	0	ENSG00000177954	ribosomal protein S27(RPS27)	6232	ribosomal protein S27(RPS27)
NP	NP_NT	RPS28	B2R4R9	ribosomal protein S28(RPS28)	NP|RPS28	NP_NT|RPS28	22	5.5	1	7.13	55	0	ENSG00000233927	ribosomal protein S28(RPS28)	6234	ribosomal protein S28(RPS28)
NP	NP_NT	SND1	A0A140VK49	staphylococcal nuclease and tudor domain containing 1(SND1)	NP|SND1	NP_NT|SND1	173	43.25	1	60.8	432.5	0	ENSG00000197157	staphylococcal nuclease and tudor domain containing 1(SND1)	27044	staphylococcal nuclease and tudor domain containing 1(SND1)
NP	NP_NT	SNX3	O60493	sorting nexin 3(SNX3)	NP|SNX3	NP_NT|SNX3	23	5.75	0.94	2.41	9.2	0.01	ENSG00000112335	sorting nexin 3(SNX3)	8724	sorting nexin 3(SNX3)
NP	NP_NT	SOS1	G5E9C8	SOS Ras/Rac guanine nucleotide exchange factor 1(SOS1)	NP|SOS1	NP_NT|SOS1	36	9	1	13.64	90	0	ENSG00000115904	SOS Ras/Rac guanine nucleotide exchange factor 1(SOS1)	6654	SOS Ras/Rac guanine nucleotide exchange factor 1(SOS1)
NP	NP_NT	SRSF3	A0A087X2D0	serine and arginine rich splicing factor 3(SRSF3)	NP|SRSF3	NP_NT|SRSF3	16	4	0.99	3.55	40	0	ENSG00000112081	serine and arginine rich splicing factor 3(SRSF3)	6428	serine and arginine rich splicing factor 3(SRSF3)
NP	NP_NT	TPT1	A0A0B4J2C3	tumor protein, translationally-controlled 1(TPT1)	NP|TPT1	NP_NT|TPT1	36	9	1	13.64	90	0	ENSG00000133112	tumor protein, translationally-controlled 1(TPT1)	7178	tumor protein, translationally-controlled 1(TPT1)
NP	NP_NT	ZNF507	Q8TCN5	zinc finger protein 507(ZNF507)	NP|ZNF507	NP_NT|ZNF507	101	25.25	1	33.22	252.5	0	ENSG00000168813	zinc finger protein 507(ZNF507)	22847	zinc finger protein 507(ZNF507)
VP24	VP24_CT	BCCIP	Q9P287	BRCA2 and CDKN1A interacting protein(BCCIP)	VP24|BCCIP	VP24_CT|BCCIP	142	35.5	0.99	4.16	11.83	0	ENSG00000107949	BRCA2 and CDKN1A interacting protein(BCCIP)	56647	BRCA2 and CDKN1A interacting protein(BCCIP)
VP24	VP24_CT	CACUL1	Q86Y37	CDK2 associated cullin domain 1(CACUL1)	VP24|CACUL1	VP24_CT|CACUL1	87	21.75	1	31.27	217.5	0	ENSG00000151893	CDK2 associated cullin domain 1(CACUL1)	143384	CDK2 associated cullin domain 1(CACUL1)
VP24	VP24_CT	CCAR2	B3KTJ9	Cell cycle and apoptosis regulator protein 2	VP24|CCAR2	VP24_CT|CCAR2	198	49.5	0.96	2.72	5.91	0	ENSG00000158941	cell cycle and apoptosis regulator 2(CCAR2)	57805	cell cycle and apoptosis regulator 2(CCAR2)
VP24	VP24_CT	GATAD2B	A0A0U1RRM1	GATA zinc finger domain containing 2B(GATAD2B)	VP24|GATAD2B	VP24_CT|GATAD2B	86	21.5	0.94	2.42	6.37	0.01	ENSG00000143614	GATA zinc finger domain containing 2B(GATAD2B)	57459	GATA zinc finger domain containing 2B(GATAD2B)
VP24	VP24_CT	GTF2A1	P52655	general transcription factor IIA subunit 1(GTF2A1)	VP24|GTF2A1	VP24_CT|GTF2A1	59	14.75	1	20.84	147.5	0	ENSG00000165417	general transcription factor IIA subunit 1(GTF2A1)	2957	general transcription factor IIA subunit 1(GTF2A1)
VP24	VP24_CT	ICE1	Q9Y2F5	interactor of little elongation complex ELL subunit 1(ICE1)	VP24|ICE1	VP24_CT|ICE1	214	53.5	1	67.52	535	0	ENSG00000164151	interactor of little elongation complex ELL subunit 1(ICE1)	23379	interactor of little elongation complex ELL subunit 1(ICE1)
VP24	VP24_CT	ICE2	A0A024R5V9	interactor of little elongation complex ELL subunit 2(ICE2)	VP24|ICE2	VP24_CT|ICE2	78	19.5	1	25.34	195	0	ENSG00000128915	interactor of little elongation complex ELL subunit 2(ICE2)	79664	interactor of little elongation complex ELL subunit 2(ICE2)
VP24	VP24_CT	KPNA1	P52294	karyopherin subunit alpha 1(KPNA1)	VP24|KPNA1	VP24_CT|KPNA1	580	145	1	203.86	1450	0	ENSG00000114030	karyopherin subunit alpha 1(KPNA1)	3836	karyopherin subunit alpha 1(KPNA1)
VP24	VP24_CT	KPNA5	O15131	karyopherin subunit alpha 5(KPNA5)	VP24|KPNA5	VP24_CT|KPNA5	323	80.75	0.75	-2.19	807.5	0.04	ENSG00000196911	karyopherin subunit alpha 5(KPNA5)	3841	karyopherin subunit alpha 5(KPNA5)
VP24	VP24_CT	KPNA6	B4DWX3	Importin subunit alpha-7	VP24|KPNA6	VP24_CT|KPNA6	717	179.25	1	251.87	1792.5	0	ENSG00000025800	karyopherin subunit alpha 6(KPNA6)	23633	karyopherin subunit alpha 6(KPNA6)
VP24	VP24_CT	MTA2	A0A024R534	metastasis associated 1 family member 2(MTA2)	VP24|MTA2	VP24_CT|MTA2	59	14.75	0.94	2.57	9.08	0.01	ENSG00000149480	metastasis associated 1 family member 2(MTA2)	9219	metastasis associated 1 family member 2(MTA2)
VP24	VP24_CT	NIFK	Q9BYG3	nucleolar protein interacting with the FHA domain of MKI67(NIFK)	VP24|NIFK	VP24_CT|NIFK	134	33.5	1	8.16	53.6	0	ENSG00000155438	nucleolar protein interacting with the FHA domain of MKI67(NIFK)	84365	nucleolar protein interacting with the FHA domain of MKI67(NIFK)
VP24	VP24_CT	NUP62	A0A024QZF1	nucleoporin 62(NUP62)	VP24|NUP62	VP24_CT|NUP62	60	15	0.98	3.06	9.23	0	ENSG00000213024	nucleoporin 62(NUP62)	23636	nucleoporin 62(NUP62)
VP24	VP24_CT	POLR3C	A0A024R4C1	RNA polymerase III subunit C(POLR3C)	VP24|POLR3C	VP24_CT|POLR3C	95	23.75	1	32.75	237.5	0	ENSG00000186141	RNA polymerase III subunit C(POLR3C)	10623	RNA polymerase III subunit C(POLR3C)
VP24	VP24_CT	POM121C	A0A075B7F8	POM121 transmembrane nucleoporin C(POM121C)	VP24|POM121C	VP24_CT|POM121C	190	47.5	1	64.64	475	0	ENSG00000272391	POM121 transmembrane nucleoporin C(POM121C)	100101267	POM121 transmembrane nucleoporin C(POM121C)
VP24	VP24_CT	PTPN2	A8K3N4	protein tyrosine phosphatase, non-receptor type 2(PTPN2)	VP24|PTPN2	VP24_CT|PTPN2	65	16.25	0.98	3.18	14.44	0	ENSG00000175354	protein tyrosine phosphatase, non-receptor type 2(PTPN2)	5771	protein tyrosine phosphatase, non-receptor type 2(PTPN2)
VP24	VP24_CT	TAF1	P21675	TATA-box binding protein associated factor 1(TAF1)	VP24|TAF1	VP24_CT|TAF1	282	70.5	1	88.98	705	0	ENSG00000147133	TATA-box binding protein associated factor 1(TAF1)	6872	TATA-box binding protein associated factor 1(TAF1)
VP24	VP24_CT	TAF4	O00268	TATA-box binding protein associated factor 4(TAF4)	VP24|TAF4	VP24_CT|TAF4	41	10.25	1	11.58	102.5	0			6874	TATA-box binding protein associated factor 4(TAF4)
VP24	VP24_CT	WDR12	Q9GZL7	WD repeat domain 12(WDR12)	VP24|WDR12	VP24_CT|WDR12	113	28.25	1	38.61	282.5	0	ENSG00000138442	WD repeat domain 12(WDR12)	55759	WD repeat domain 12(WDR12)
VP24	VP24_NT	CSE1L	P55060	chromosome segregation 1 like(CSE1L)	VP24|CSE1L	VP24_NT|CSE1L	1866	466.5	1	12.72	21.7	0	ENSG00000124207	chromosome segregation 1 like(CSE1L)	1434	chromosome segregation 1 like(CSE1L)
VP24	VP24_NT	EIF2S2	B5BU01	eukaryotic translation initiation factor 2 subunit beta(EIF2S2)	VP24|EIF2S2	VP24_NT|EIF2S2	16	4	1	5.16	40	0	ENSG00000125977	eukaryotic translation initiation factor 2 subunit beta(EIF2S2)	8894	eukaryotic translation initiation factor 2 subunit beta(EIF2S2)
VP24	VP24_NT	HDLBP	B2R5V9	high density lipoprotein binding protein(HDLBP)	VP24|HDLBP	VP24_NT|HDLBP	185	46.25	0.75	-2.32	462.5	0.03	ENSG00000115677	high density lipoprotein binding protein(HDLBP)	3069	high density lipoprotein binding protein(HDLBP)
VP24	VP24_NT	IPO9	Q96P70	importin 9(IPO9)	VP24|IPO9	VP24_NT|IPO9	21	5.25	1	6.91	52.5	0	ENSG00000198700	importin 9(IPO9)	55705	importin 9(IPO9)
VP24	VP24_NT	JPH1	Q4KMX3	junctophilin 1(JPH1)	VP24|JPH1	VP24_NT|JPH1	65	16.25	1	19.57	162.5	0	ENSG00000104369	junctophilin 1(JPH1)	56704	junctophilin 1(JPH1)
VP24	VP24_NT	KPNA2	Q6NVW7	karyopherin subunit alpha 2(KPNA2)	VP24|KPNA2	VP24_NT|KPNA2	200	50	1	67.76	500	0	ENSG00000182481	karyopherin subunit alpha 2(KPNA2)	3838	karyopherin subunit alpha 2(KPNA2)
VP24	VP24_NT	MCM3AP	O60318	minichromosome maintenance complex component 3 associated protein(MCM3AP)	VP24|MCM3AP	VP24_NT|MCM3AP	253	63.25	1	82.08	632.5	0	ENSG00000160294	minichromosome maintenance complex component 3 associated protein(MCM3AP)	8888	minichromosome maintenance complex component 3 associated protein(MCM3AP)
VP24	VP24_NT	OSBPL8	A0A024RBB8	oxysterol binding protein like 8(OSBPL8)	VP24|OSBPL8	VP24_NT|OSBPL8	499	124.75	1	37.45	332.67	0	ENSG00000091039	oxysterol binding protein like 8(OSBPL8)	114882	oxysterol binding protein like 8(OSBPL8)
VP24	VP24_NT	POM121	Q96HA1	POM121 transmembrane nucleoporin(POM121)	VP24|POM121	VP24_NT|POM121	149	37.25	1	50.48	372.5	0	ENSG00000196313	POM121 transmembrane nucleoporin(POM121)	9883	POM121 transmembrane nucleoporin(POM121)
VP24	VP24_NT	RPS25	P62851	ribosomal protein S25(RPS25)	VP24|RPS25	VP24_NT|RPS25	17	4.25	1	6.91	42.5	0	ENSG00000118181	ribosomal protein S25(RPS25)	6230	ribosomal protein S25(RPS25)
VP24	VP24_NT	SPDL1	Q96EA4	spindle apparatus coiled-coil protein 1(SPDL1)	VP24|SPDL1	VP24_NT|SPDL1	35	8.75	1	11.83	87.5	0	ENSG00000040275	spindle apparatus coiled-coil protein 1(SPDL1)	54908	spindle apparatus coiled-coil protein 1(SPDL1)
VP24	VP24_NT	TAF9	Q16594	TATA-box binding protein associated factor 9(TAF9)	VP24|TAF9	VP24_NT|TAF9	98	24.5	0.93	2.12	5.3	0.01	ENSG00000273841	TATA-box binding protein associated factor 9(TAF9)	6880	TATA-box binding protein associated factor 9(TAF9)
VP24	VP24_NT	TAF9B	Q9HBM6	TATA-box binding protein associated factor 9b(TAF9B)	VP24|TAF9B	VP24_NT|TAF9B	79	19.75	1	27.08	197.5	0	ENSG00000187325	TATA-box binding protein associated factor 9b(TAF9B)	51616	TATA-box binding protein associated factor 9b(TAF9B)
VP24	VP24_NT	TCP1	P17987	t-complex 1(TCP1)	VP24|TCP1	VP24_NT|TCP1	60	15	1	14.97	150	0	ENSG00000120438	t-complex 1(TCP1)	6950	t-complex 1(TCP1)
VP24	VP24_NT	USP9X	Q93008	ubiquitin specific peptidase 9, X-linked(USP9X)	VP24|USP9X	VP24_NT|USP9X	63	15.75	1	19.57	157.5	0	ENSG00000124486	ubiquitin specific peptidase 9, X-linked(USP9X)	8239	ubiquitin specific peptidase 9, X-linked(USP9X)
VP24	VP24_NT	WASF1	Q92558	WAS protein family member 1(WASF1)	VP24|WASF1	VP24_NT|WASF1	49	12.25	1	16.52	122.5	0	ENSG00000112290	WAS protein family member 1(WASF1)	8936	WAS protein family member 1(WASF1)
VP24	VP24_NT	WASF2	Q9Y6W5	WAS protein family member 2(WASF2)	VP24|WASF2	VP24_NT|WASF2	158	39.5	1	53.37	395	0	ENSG00000158195	WAS protein family member 2(WASF2)	10163	WAS protein family member 2(WASF2)
VP30	VP30_CT	AFDN	A8MQ02	afadin, adherens junction formation factor(AFDN)	VP30|AFDN	VP30_CT|AFDN	214	53.5	1	72.93	535	0	ENSG00000130396	afadin, adherens junction formation factor(AFDN)	4301	afadin, adherens junction formation factor(AFDN)
VP30	VP30_CT	AFDN	P55196-1	afadin, adherens junction formation factor(AFDN)	VP30|AFDN	VP30_CT|AFDN	211	52.75	1	70.06	527.5	0	ENSG00000130396	afadin, adherens junction formation factor(AFDN)	4301	afadin, adherens junction formation factor(AFDN)
VP30	VP30_CT	LARP4	Q71RC2	La ribonucleoprotein domain family member 4(LARP4)	VP30|LARP4	VP30_CT|LARP4	36	9	1	11.26	90	0	ENSG00000161813	La ribonucleoprotein domain family member 4(LARP4)	113251	La ribonucleoprotein domain family member 4(LARP4)
VP30	VP30_CT	LARP4B	Q92615	La ribonucleoprotein domain family member 4B(LARP4B)	VP30|LARP4B	VP30_CT|LARP4B	56	14	0.99	3.61	28	0	ENSG00000107929	La ribonucleoprotein domain family member 4B(LARP4B)	23185	La ribonucleoprotein domain family member 4B(LARP4B)
VP30	VP30_CT	MAPT	A0A024R9Y0	microtubule associated protein tau(MAPT)	VP30|MAPT	VP30_CT|MAPT	32	8	1	9.65	80	0	ENSG00000186868	microtubule associated protein tau(MAPT)	4137	microtubule associated protein tau(MAPT)
VP30	VP30_CT	PABPC1	A0A024R9C1	poly(A) binding protein cytoplasmic 1(PABPC1)	VP30|PABPC1	VP30_CT|PABPC1	209	52.25	1	7.2	46.44	0			26986	poly(A) binding protein cytoplasmic 1(PABPC1)
VP30	VP30_CT	RBMS1	A0A0S2Z499	RNA binding motif single stranded interacting protein 1(RBMS1)	VP30|RBMS1	VP30_CT|RBMS1	26	6.5	1	8.02	65	0			5937	RNA binding motif single stranded interacting protein 1(RBMS1)
VP30	VP30_NT	MPHOSPH9	A0A0A0MTP3	M-phase phosphoprotein 9(MPHOSPH9)	VP30|MPHOSPH9	VP30_NT|MPHOSPH9	54	13.5	1	14.56	135	0	ENSG00000051825	M-phase phosphoprotein 9(MPHOSPH9)	10198	M-phase phosphoprotein 9(MPHOSPH9)
VP30	VP30_NT	PATL1	Q86TB9-4	PAT1 homolog 1, processing body mRNA decay factor(PATL1)	VP30|PATL1	VP30_NT|PATL1	38	9.5	0.75	-3.13	95	0.04	ENSG00000166889	PAT1 homolog 1, processing body mRNA decay factor(PATL1)	219988	PAT1 homolog 1, processing body mRNA decay factor(PATL1)
VP30	VP30_NT	RBBP6	Q7Z6E9	RB binding protein 6, ubiquitin ligase(RBBP6)	VP30|RBBP6	VP30_NT|RBBP6	1008	252	1	10.48	27.62	0	ENSG00000122257	RB binding protein 6, ubiquitin ligase(RBBP6)	5930	RB binding protein 6, ubiquitin ligase(RBBP6)
VP30	VP30_NT	SRPK2	A0A024R704	SRSF protein kinase 2(SRPK2)	VP30|SRPK2	VP30_NT|SRPK2	58	14.5	1	19.17	145	0	ENSG00000135250	SRSF protein kinase 2(SRPK2)	6733	SRSF protein kinase 2(SRPK2)
VP30	VP30_NT	TCEB2	I3L0M9	transcription elongation factor B subunit 2(TCEB2)	VP30|TCEB2	VP30_NT|TCEB2	11	2.75	0.97	2.52	22	0	ENSG00000103363	transcription elongation factor B subunit 2(TCEB2)	6923	transcription elongation factor B subunit 2(TCEB2)
VP30	VP30_NT	WIPF2	Q8TF74	WAS/WASL interacting protein family member 2(WIPF2)	VP30|WIPF2	VP30_NT|WIPF2	132	33	1	38.44	330	0	ENSG00000171475	WAS/WASL interacting protein family member 2(WIPF2)	147179	WAS/WASL interacting protein family member 2(WIPF2)
VP30	VP30_NT	YEATS2	Q9ULM3	YEATS domain containing 2(YEATS2)	VP30|YEATS2	VP30_NT|YEATS2	113	28.25	0.95	1.58	10.76	0.01	ENSG00000163872	YEATS domain containing 2(YEATS2)	55689	YEATS domain containing 2(YEATS2)
VP35	VP35_CT	CCDC138	Q96M89	coiled-coil domain containing 138(CCDC138)	VP35|CCDC138	VP35_CT|CCDC138	66	16.5	0.75	-2.52	165	0	ENSG00000163006	coiled-coil domain containing 138(CCDC138)	165055	coiled-coil domain containing 138(CCDC138)
VP35	VP35_NT	CNOT10	Q9H9A5	CCR4-NOT transcription complex subunit 10(CNOT10)	VP35|CNOT10	VP35_NT|CNOT10	23	5.75	0.75	-2.08	57.5	0.04	ENSG00000182973	CCR4-NOT transcription complex subunit 10(CNOT10)	25904	CCR4-NOT transcription complex subunit 10(CNOT10)
VP35	VP35_NT	CNOT11	Q9UKZ1	CCR4-NOT transcription complex subunit 11(CNOT11)	VP35|CNOT11	VP35_NT|CNOT11	79	19.75	1	28.8	197.5	0	ENSG00000158435	CCR4-NOT transcription complex subunit 11(CNOT11)	55571	CCR4-NOT transcription complex subunit 11(CNOT11)
VP35	VP35_NT	DCP1A	A0A0S2Z5K3	decapping mRNA 1A(DCP1A)	VP35|DCP1A	VP35_NT|DCP1A	189	47.25	0.75	-25.49	8.15	0.02	ENSG00000272886	decapping mRNA 1A(DCP1A)	55802	decapping mRNA 1A(DCP1A)
VP35	VP35_NT	DCP1B	Q8IZD4	decapping mRNA 1B(DCP1B)	VP35|DCP1B	VP35_NT|DCP1B	259	64.75	1	35.04	259	0	ENSG00000151065	decapping mRNA 1B(DCP1B)	196513	decapping mRNA 1B(DCP1B)
VP35	VP35_NT	DCP2	Q8IU60	decapping mRNA 2(DCP2)	VP35|DCP2	VP35_NT|DCP2	117	29.25	1	43.46	292.5	0	ENSG00000172795	decapping mRNA 2(DCP2)	167227	decapping mRNA 2(DCP2)
VP35	VP35_NT	DDX6	P26196	DEAD-box helicase 6(DDX6)	VP35|DDX6	VP35_NT|DDX6	162	40.5	1	52.16	405	0	ENSG00000110367	DEAD-box helicase 6(DDX6)	1656	DEAD-box helicase 6(DDX6)
VP35	VP35_NT	DYNLL1	Q6FGH9	dynein light chain LC8-type 1(DYNLL1)	VP35|DYNLL1	VP35_NT|DYNLL1	137	34.25	1	42.01	342.5	0	ENSG00000088986	dynein light chain LC8-type 1(DYNLL1)	8655	dynein light chain LC8-type 1(DYNLL1)
VP35	VP35_NT	DYNLL2	Q96FJ2	dynein light chain LC8-type 2(DYNLL2)	VP35|DYNLL2	VP35_NT|DYNLL2	92	23	1	33.23	230	0	ENSG00000264364	dynein light chain LC8-type 2(DYNLL2)	140735	dynein light chain LC8-type 2(DYNLL2)
VP35	VP35_NT	EDC3	Q96F86	enhancer of mRNA decapping 3(EDC3)	VP35|EDC3	VP35_NT|EDC3	257	64.25	1	88.04	642.5	0	ENSG00000179151	enhancer of mRNA decapping 3(EDC3)	80153	enhancer of mRNA decapping 3(EDC3)
VP35	VP35_NT	EDC4	Q6P2E9	enhancer of mRNA decapping 4(EDC4)	VP35|EDC4	VP35_NT|EDC4	2273	568.25	1	7.86	11.28	0	ENSG00000038358	enhancer of mRNA decapping 4(EDC4)	23644	enhancer of mRNA decapping 4(EDC4)
VP35	VP35_NT	EIF4ENIF1	A0A024R1K0	eukaryotic translation initiation factor 4E nuclear import factor 1(EIF4ENIF1)	VP35|EIF4ENIF1	VP35_NT|EIF4ENIF1	168	42	1	46.37	420	0	ENSG00000184708	eukaryotic translation initiation factor 4E nuclear import factor 1(EIF4ENIF1)	56478	eukaryotic translation initiation factor 4E nuclear import factor 1(EIF4ENIF1)
VP35	VP35_NT	FAM193A	A0A1B0GVL4	family with sequence similarity 193 member A(FAM193A)	VP35|FAM193A	VP35_NT|FAM193A	47	11.75	1	16.76	117.5	0	ENSG00000125386	family with sequence similarity 193 member A(FAM193A)	8603	family with sequence similarity 193 member A(FAM193A)
VP35	VP35_NT	FAM193B	Q96PV7	family with sequence similarity 193 member B(FAM193B)	VP35|FAM193B	VP35_NT|FAM193B	21	5.25	0.75	-2.08	52.5	0.05	ENSG00000146067	family with sequence similarity 193 member B(FAM193B)	54540	family with sequence similarity 193 member B(FAM193B)
VP35	VP35_NT	GAS8	O95995	growth arrest specific 8(GAS8)	VP35|GAS8	VP35_NT|GAS8	110	27.5	1	37.63	275	0	ENSG00000141013	growth arrest specific 8(GAS8)	2622	growth arrest specific 8(GAS8)
VP35	VP35_NT	GIGYF1	O75420	GRB10 interacting GYF protein 1(GIGYF1)	VP35|GIGYF1	VP35_NT|GIGYF1	48	12	1	15.21	120	0	ENSG00000146830	GRB10 interacting GYF protein 1(GIGYF1)	64599	GRB10 interacting GYF protein 1(GIGYF1)
VP35	VP35_NT	GPBP1	D4PHA4	GC-rich promoter binding protein 1(GPBP1)	VP35|GPBP1	VP35_NT|GPBP1	22	5.5	0.75	-2.08	55	0.04	ENSG00000062194	GC-rich promoter binding protein 1(GPBP1)	65056	GC-rich promoter binding protein 1(GPBP1)
VP35	VP35_NT	IGF2BP2	F8W930	insulin like growth factor 2 mRNA binding protein 2(IGF2BP2)	VP35|IGF2BP2	VP35_NT|IGF2BP2	172	43	1	6.51	21.5	0	ENSG00000073792	insulin like growth factor 2 mRNA binding protein 2(IGF2BP2)	10644	insulin like growth factor 2 mRNA binding protein 2(IGF2BP2)
VP35	VP35_NT	IGF2BP3	O00425	insulin like growth factor 2 mRNA binding protein 3(IGF2BP3)	VP35|IGF2BP3	VP35_NT|IGF2BP3	68	17	1	19.81	170	0	ENSG00000136231	insulin like growth factor 2 mRNA binding protein 3(IGF2BP3)	10643	insulin like growth factor 2 mRNA binding protein 3(IGF2BP3)
VP35	VP35_NT	JCAD	Q9P266	junctional cadherin 5 associated	VP35|JCAD	VP35_NT|JCAD	177	44.25	1	60.82	442.5	0
VP35	VP35_NT	LSM14A	Q8ND56	LSM14A, mRNA processing body assembly factor(LSM14A)	VP35|LSM14A	VP35_NT|LSM14A	95	23.75	1	33.23	237.5	0	ENSG00000257103	LSM14A, mRNA processing body assembly factor(LSM14A)	26065	LSM14A, mRNA processing body assembly factor(LSM14A)
VP35	VP35_NT	LSM14B	Q9BX40	LSM family member 14B(LSM14B)	VP35|LSM14B	VP35_NT|LSM14B	69	17.25	1	4.96	23	0	ENSG00000149657	LSM family member 14B(LSM14B)	149986	LSM family member 14B(LSM14B)
VP35	VP35_NT	MEIOC	A2RUB1	meiosis specific with coiled-coil domain(MEIOC)	VP35|MEIOC	VP35_NT|MEIOC	96	24	1	30.28	240	0	ENSG00000180336	meiosis specific with coiled-coil domain(MEIOC)	284071	meiosis specific with coiled-coil domain(MEIOC)
VP35	VP35_NT	MIB2	B4DEI6	E3 ubiquitin-protein ligase MIB2	VP35|MIB2	VP35_NT|MIB2	34	8.5	0.75	-2.08	85	0.03	ENSG00000197530	mindbomb E3 ubiquitin protein ligase 2(MIB2)	142678	mindbomb E3 ubiquitin protein ligase 2(MIB2)
VP35	VP35_NT	PATL1	Q86TB9	PAT1 homolog 1, processing body mRNA decay factor(PATL1)	VP35|PATL1	VP35_NT|PATL1	257	64.25	1	90.89	642.5	0	ENSG00000166889	PAT1 homolog 1, processing body mRNA decay factor(PATL1)	219988	PAT1 homolog 1, processing body mRNA decay factor(PATL1)
VP35	VP35_NT	PDLIM7	Q9NR12	PDZ and LIM domain 7(PDLIM7)	VP35|PDLIM7	VP35_NT|PDLIM7	23	5.75	1	8.83	57.5	0	ENSG00000196923	PDZ and LIM domain 7(PDLIM7)	9260	PDZ and LIM domain 7(PDLIM7)
VP35	VP35_NT	RC3H1	Q5TC82	ring finger and CCCH-type domains 1(RC3H1)	VP35|RC3H1	VP35_NT|RC3H1	85	21.25	1	27.32	212.5	0	ENSG00000135870	ring finger and CCCH-type domains 1(RC3H1)	149041	ring finger and CCCH-type domains 1(RC3H1)
VP35	VP35_NT	RC3H2	A0A024R899	ring finger and CCCH-type domains 2(RC3H2)	VP35|RC3H2	VP35_NT|RC3H2	74	18.5	1	22.84	185	0	ENSG00000056586	ring finger and CCCH-type domains 2(RC3H2)	54542	ring finger and CCCH-type domains 2(RC3H2)
VP35	VP35_NT	RNF214	A0A024R3D4	ring finger protein 214(RNF214)	VP35|RNF214	VP35_NT|RNF214	36	9	1	8.83	90	0	ENSG00000167257	ring finger protein 214(RNF214)	257160	ring finger protein 214(RNF214)
VP35	VP35_NT	SMG7	Q92540	SMG7, nonsense mediated mRNA decay factor(SMG7)	VP35|SMG7	VP35_NT|SMG7	204	51	1	6.26	29.14	0	ENSG00000116698	SMG7, nonsense mediated mRNA decay factor(SMG7)	9887	SMG7, nonsense mediated mRNA decay factor(SMG7)
VP35	VP35_NT	SPATA2	B3KN08	Spermatogenesis-associated protein 2	VP35|SPATA2	VP35_NT|SPATA2	29	7.25	1	8.83	72.5	0	ENSG00000158480	spermatogenesis associated 2(SPATA2)	9825	spermatogenesis associated 2(SPATA2)
VP35	VP35_NT	TNRC6A	Q8NDV7-6	trinucleotide repeat containing 6A(TNRC6A)	VP35|TNRC6A	VP35_NT|TNRC6A	630	157.5	1	200.1	1575	0	ENSG00000090905	trinucleotide repeat containing 6A(TNRC6A)	27327	trinucleotide repeat containing 6A(TNRC6A)
VP35	VP35_NT	XRN1	Q8IZH2-2	5'-3' exoribonuclease 1(XRN1)	VP35|XRN1	VP35_NT|XRN1	877	219.25	1	7.93	38.13	0	ENSG00000114127	5'-3' exoribonuclease 1(XRN1)	54464	5'-3' exoribonuclease 1(XRN1)
VP35	VP35_NT	YTHDF1	B4DT65	YTH N6-methyladenosine RNA binding protein 1	VP35|YTHDF1	VP35_NT|YTHDF1	53	13.25	1	16.76	132.5	0	ENSG00000149658	YTH N6-methyladenosine RNA binding protein 1(YTHDF1)	54915	YTH N6-methyladenosine RNA binding protein 1(YTHDF1)
VP35	VP35_NT	ZMYM1	Q5SVZ6	zinc finger MYM-type containing 1(ZMYM1)	VP35|ZMYM1	VP35_NT|ZMYM1	193	48.25	1	62.26	482.5	0	ENSG00000197056	zinc finger MYM-type containing 1(ZMYM1)	79830	zinc finger MYM-type containing 1(ZMYM1)
VP40	VP40_CT	GPSM1	A0A0A0MRC4	G-protein signaling modulator 1(GPSM1)	VP40|GPSM1	VP40_CT|GPSM1	91	22.75	0.75	-2.07	227.5	0.01	ENSG00000160360	G-protein signaling modulator 1(GPSM1)	26086	G-protein signaling modulator 1(GPSM1)
VP40	VP40_NT	DSG2	Q14126	desmoglein 2(DSG2)	VP40|DSG2	VP40_NT|DSG2	263	65.75	1	5.68	9.39	0	ENSG00000046604	desmoglein 2(DSG2)	1829	desmoglein 2(DSG2)
VP40	VP40_NT	EPB41	P11171	erythrocyte membrane protein band 4.1(EPB41)	VP40|EPB41	VP40_NT|EPB41	101	25.25	0.98	3.17	15.54	0	ENSG00000159023	erythrocyte membrane protein band 4.1(EPB41)	2035	erythrocyte membrane protein band 4.1(EPB41)
VP40	VP40_NT	LNPEP	B2RAK1	cDNA, FLJ94965, highly similar to Homo sapiens leucyl/cystinyl aminopeptidase (LNPEP), mRNA	VP40|LNPEP	VP40_NT|LNPEP	58	14.5	1	19.48	145	0	ENSG00000113441	leucyl and cystinyl aminopeptidase(LNPEP)	4012	leucyl and cystinyl aminopeptidase(LNPEP)
VP40	VP40_NT	LTN1	O94822	listerin E3 ubiquitin protein ligase 1(LTN1)	VP40|LTN1	VP40_NT|LTN1	114	28.5	0.75	-2.17	285	0.03	ENSG00000198862	listerin E3 ubiquitin protein ligase 1(LTN1)	26046	listerin E3 ubiquitin protein ligase 1(LTN1)
VP40	VP40_NT	MON2	B7ZM73	MON2 homolog, regulator of endosome-to-Golgi trafficking(MON2)	VP40|MON2	VP40_NT|MON2	44	11	1	14.88	110	0	ENSG00000061987	MON2 homolog, regulator of endosome-to-Golgi trafficking(MON2)	23041	MON2 homolog, regulator of endosome-to-Golgi trafficking(MON2)
VP40	VP40_NT	NECTIN2	Q92692	nectin cell adhesion molecule 2(NECTIN2)	VP40|NECTIN2	VP40_NT|NECTIN2	100	25	1	5.12	28.57	0	ENSG00000130202	nectin cell adhesion molecule 2(NECTIN2)	5819	nectin cell adhesion molecule 2(NECTIN2)
VP40	VP40_NT	NOTCH2	Q04721	notch 2(NOTCH2)	VP40|NOTCH2	VP40_NT|NOTCH2	317	79.25	1	71.97	792.5	0	ENSG00000134250	notch 2(NOTCH2)	4853	notch 2(NOTCH2)
VP40	VP40_NT	PDCD11	Q14690	programmed cell death 11(PDCD11)	VP40|PDCD11	VP40_NT|PDCD11	57	14.25	1	21	142.5	0	ENSG00000148843	programmed cell death 11(PDCD11)	22984	programmed cell death 11(PDCD11)
VP40	VP40_NT	PPM1B	O75688	protein phosphatase, Mg2+/Mn2+ dependent 1B(PPM1B)	VP40|PPM1B	VP40_NT|PPM1B	104	26	1	37.3	260	0	ENSG00000138032	protein phosphatase, Mg2+/Mn2+ dependent 1B(PPM1B)	5495	protein phosphatase, Mg2+/Mn2+ dependent 1B(PPM1B)
VP40	VP40_NT	PPP6R3	E9PKF6	protein phosphatase 6 regulatory subunit 3(PPP6R3)	VP40|PPP6R3	VP40_NT|PPP6R3	66	16.5	0.75	-2.17	165	0.05	ENSG00000110075	protein phosphatase 6 regulatory subunit 3(PPP6R3)	55291	protein phosphatase 6 regulatory subunit 3(PPP6R3)
VP40	VP40_NT	PTPN14	A8K6H6	protein tyrosine phosphatase, non-receptor type 14(PTPN14)	VP40|PTPN14	VP40_NT|PTPN14	45	11.25	1	16.43	112.5	0	ENSG00000152104	protein tyrosine phosphatase, non-receptor type 14(PTPN14)	5784	protein tyrosine phosphatase, non-receptor type 14(PTPN14)
VP40	VP40_NT	RAB11FIP1	Q6WKZ4	RAB11 family interacting protein 1(RAB11FIP1)	VP40|RAB11FIP1	VP40_NT|RAB11FIP1	53	13.25	0.79	0.88	6.31	0.02	ENSG00000156675	RAB11 family interacting protein 1(RAB11FIP1)	80223	RAB11 family interacting protein 1(RAB11FIP1)
VP40	VP40_NT	RASAL2	Q9UJF2-2	RAS protein activator like 2(RASAL2)	VP40|RASAL2	VP40_NT|RASAL2	67	16.75	1	17.96	167.5	0	ENSG00000075391	RAS protein activator like 2(RASAL2)	9462	RAS protein activator like 2(RASAL2)
VP40	VP40_NT	SET	A0A024R895	SET nuclear proto-oncogene(SET)	VP40|SET	VP40_NT|SET	29	7.25	0.96	2.49	14.5	0	ENSG00000119335	SET nuclear proto-oncogene(SET)	6418	SET nuclear proto-oncogene(SET)
VP40	VP40_NT	SLC38A2	A0A024R0W3	solute carrier family 38 member 2(SLC38A2)	VP40|SLC38A2	VP40_NT|SLC38A2	15	3.75	1	5.07	37.5	0	ENSG00000134294	solute carrier family 38 member 2(SLC38A2)	54407	solute carrier family 38 member 2(SLC38A2)
VP40	VP40_NT	SMCR8	Q8TEV9	Smith-Magenis syndrome chromosome region, candidate 8(SMCR8)	VP40|SMCR8	VP40_NT|SMCR8	135	33.75	1	46.04	337.5	0	ENSG00000176994	Smith-Magenis syndrome chromosome region, candidate 8(SMCR8)	140775	Smith-Magenis syndrome chromosome region, candidate 8(SMCR8)
VP40	VP40_NT	SORT1	Q99523-2	sortilin 1(SORT1)	VP40|SORT1	VP40_NT|SORT1	31	7.75	1	10.13	77.5	0	ENSG00000134243	sortilin 1(SORT1)	6272	sortilin 1(SORT1)
VP40	VP40_NT	TBC1D15	Q8TC07	TBC1 domain family member 15(TBC1D15)	VP40|TBC1D15	VP40_NT|TBC1D15	55	13.75	0.97	3.15	12.22	0	ENSG00000121749	TBC1 domain family member 15(TBC1D15)	64786	TBC1 domain family member 15(TBC1D15)
VP40	VP40_NT	UBAP1	A0A0D9SG79	ubiquitin associated protein 1(UBAP1)	VP40|UBAP1	VP40_NT|UBAP1	16	4	1	5.07	40	0	ENSG00000165006	ubiquitin associated protein 1(UBAP1)	51271	ubiquitin associated protein 1(UBAP1)
VP40	VP40_NT	USP6NL	X6RAB3	USP6 N-terminal like(USP6NL)	VP40|USP6NL	VP40_NT|USP6NL	101	25.25	1	35.84	252.5	0	ENSG00000148429	USP6 N-terminal like(USP6NL)	9712	USP6 N-terminal like(USP6NL)

## Sheet: BioID by Viral Protein vs GFP
Bait	Bait Construct	Prey	UniProtID	Gene Name	Protein Interaction ID	SpecSum	AvgSpec	Saint Score	log Odds Score	Fold Change	BFDR	Ensembl Gene ID	Ensembl Gene description	NCBI Entrez Gene ID	NCBI Entrez Gene descriptiion
NP	NP_CT	(SEPT9)	Q9UHD8	septin 9(SEPT9)	NP|(SEPT9)	46	11.5	1	16.93	115	0			10801	septin 9(SEPT9)
NP	NP_CT	AARS	P49588	alanyl-tRNA synthetase(AARS)	NP|AARS	56	14	0.83	0.95	4.15	0.01			16	alanyl-tRNA synthetase(AARS)
NP	NP_CT	AARSD1	Q9BTE6	alanyl-tRNA synthetase domain containing 1(AARSD1)	NP|AARSD1	49	12.25	1	13.82	122.5	0			80755	alanyl-tRNA synthetase domain containing 1(AARSD1)
NP	NP_NT	ABI2	A0A0C4DG21	abl interactor 2(ABI2)	NP|ABI2	25	6.25	1	7.13	62.5	0			10152	abl interactor 2(ABI2)
NP	NP_CT	ABL2	P42684	ABL proto-oncogene 2, non-receptor tyrosine kinase(ABL2)	NP|ABL2	100	25	1	36.33	250	0	ENSG00000143322	ABL proto-oncogene 2, non-receptor tyrosine kinase(ABL2)	27	ABL proto-oncogene 2, non-receptor tyrosine kinase(ABL2)
NP	NP_NT	ACOT7	O00154	acyl-CoA thioesterase 7(ACOT7)	NP|ACOT7	69	17.25	1	22.82	172.5	0			11332	acyl-CoA thioesterase 7(ACOT7)
NP	NP_CT	AHNAK	Q09666	AHNAK nucleoprotein(AHNAK)	NP|AHNAK	4425	1106.25	1	9.64	12.94	0			79026	AHNAK nucleoprotein(AHNAK)
NP	NP_CT	AHNAK2	Q8IVF2	AHNAK nucleoprotein 2(AHNAK2)	NP|AHNAK2	530	132.5	1	174.82	1325	0	ENSG00000185567	AHNAK nucleoprotein 2(AHNAK2)	113146	AHNAK nucleoprotein 2(AHNAK2)
NP	NP_CT	AP1G1	A0A140VJE7	adaptor related protein complex 1 gamma 1 subunit(AP1G1)	NP|AP1G1	59	14.75	1	21.5	147.5	0	ENSG00000166747	adaptor related protein complex 1 gamma 1 subunit(AP1G1)	164	adaptor related protein complex 1 gamma 1 subunit(AP1G1)
NP	NP_NT	ARF3	A0A024R0Y6	ADP ribosylation factor 3(ARF3)	NP|ARF3	58	14.5	0.96	2.42	8.92	0			377	ADP ribosylation factor 3(ARF3)
NP	NP_CT	ARHGAP29	Q52LW3	Rho GTPase activating protein 29(ARHGAP29)	NP|ARHGAP29	94	23.5	1	30.45	235	0	ENSG00000137962	Rho GTPase activating protein 29(ARHGAP29)	9411	Rho GTPase activating protein 29(ARHGAP29)
NP	NP_CT	ARHGEF16	B3KTS4	Rho guanine nucleotide exchange factor 16(ARHGEF16)	NP|ARHGEF16	65	16.25	1	21.5	162.5	0	ENSG00000130762	Rho guanine nucleotide exchange factor 16(ARHGEF16)	27237	Rho guanine nucleotide exchange factor 16(ARHGEF16)
NP	NP_NT	ATP6V1A	P38606	ATPase H+ transporting V1 subunit A(ATP6V1A)	NP|ATP6V1A	129	32.25	0.99	4	18.43	0	ENSG00000114573	ATPase H+ transporting V1 subunit A(ATP6V1A)	523	ATPase H+ transporting V1 subunit A(ATP6V1A)
NP	NP_NT	B3KM97	B3KM97	Very-long-chain enoyl-CoA reductase	NP|B3KM97	17	4.25	1	5.39	42.5	0
NP	NP_CT	B3KSV4	B3KSV4	cDNA FLJ37129 fis, clone BRACE2022990	NP|B3KSV4	126	31.5	1	46.54	315	0
NP	NP_NT	BACH1	O14867	BTB domain and CNC homolog 1(BACH1)	NP|BACH1	109	27.25	0.99	5.07	19.82	0			571	BTB domain and CNC homolog 1(BACH1)
NP	NP_NT	BCCIP	Q9P287	BRCA2 and CDKN1A interacting protein(BCCIP)	NP|BCCIP	76	19	1	25.82	190	0	ENSG00000107949	BRCA2 and CDKN1A interacting protein(BCCIP)	56647	BRCA2 and CDKN1A interacting protein(BCCIP)
NP	NP_CT	BRCA2	P51587	BRCA2, DNA repair associated(BRCA2)	NP|BRCA2	270	67.5	1	93.91	675	0			675	BRCA2, DNA repair associated(BRCA2)
NP	NP_NT	BTF3	P20290	basic transcription factor 3(BTF3)	NP|BTF3	16	4	0.92	1.05	10.67	0.01			689	basic transcription factor 3(BTF3)
NP	NP_CT	C16ORF70	A0A024R6W4	chromosome 16 open reading frame 70(C16orf70)	NP|C16ORF70	15	3.75	1	5.57	37.5	0	ENSG00000125149	chromosome 16 open reading frame 70(C16orf70)	80262	chromosome 16 open reading frame 70(C16orf70)
NP	NP_CT	C1ORF198	A0A024R3S1	chromosome 1 open reading frame 198(C1orf198)	NP|C1ORF198	29	7.25	1	10.63	72.5	0	ENSG00000119280	chromosome 1 open reading frame 198(C1orf198)	84886	chromosome 1 open reading frame 198(C1orf198)
NP	NP_CT	C6ORF132	Q5T0Z8	chromosome 6 open reading frame 132(C6orf132)	NP|C6ORF132	64	16	1	21.5	160	0	ENSG00000188112	chromosome 6 open reading frame 132(C6orf132)	647024	chromosome 6 open reading frame 132(C6orf132)
NP	NP_CT	CAMSAP2	Q08AD1	calmodulin regulated spectrin associated protein family member 2(CAMSAP2)	NP|CAMSAP2	161	40.25	1	56.66	402.5	0	ENSG00000118200	calmodulin regulated spectrin associated protein family member 2(CAMSAP2)	23271	calmodulin regulated spectrin associated protein family member 2(CAMSAP2)
NP	NP_CT	CAMSAP3	Q9P1Y5	calmodulin regulated spectrin associated protein family member 3(CAMSAP3)	NP|CAMSAP3	322	80.5	0.96	2.38	4.88	0	ENSG00000076826	calmodulin regulated spectrin associated protein family member 3(CAMSAP3)	57662	calmodulin regulated spectrin associated protein family member 3(CAMSAP3)
NP	NP_NT	CAPZB	B2R7T8	F-actin-capping protein subunit beta	NP|CAPZB	31	7.75	1	5.94	31	0
NP	NP_CT	CASC5	Q05C46	CASC5 protein	NP|CASC5	97	24.25	0.96	3	5.88	0
NP	NP_NT	CC2D1A	Q6P1N0	coiled-coil and C2 domain containing 1A(CC2D1A)	NP|CC2D1A	220	55	0.98	3.26	5.37	0			54862	coiled-coil and C2 domain containing 1A(CC2D1A)
NP	NP_CT	CCDC85C	A6NKD9	coiled-coil domain containing 85C(CCDC85C)	NP|CCDC85C	55	13.75	0.98	3.48	7.33	0			317762	coiled-coil domain containing 85C(CCDC85C)
NP	NP_CT	CD2AP	Q9Y5K6	CD2 associated protein(CD2AP)	NP|CD2AP	515	128.75	0.98	3.37	5	0			23607	CD2 associated protein(CD2AP)
NP	NP_CT	CEP192	Q8TEP8	centrosomal protein 192(CEP192)	NP|CEP192	465	116.25	1	6.38	9.12	0			55125	centrosomal protein 192(CEP192)
NP	NP_NT	CEP55	D3DR37	centrosomal protein 55(CEP55)	NP|CEP55	47	11.75	0.96	3.09	9.4	0			55165	centrosomal protein 55(CEP55)
NP	NP_CT	CEP85	Q6P2H3	centrosomal protein 85(CEP85)	NP|CEP85	73	18.25	1	26	182.5	0			64793	centrosomal protein 85(CEP85)
NP	NP_CT	CEP85L	Q5SZL2	centrosomal protein 85 like(CEP85L)	NP|CEP85L	87	21.75	1	27.49	217.5	0	ENSG00000111860	centrosomal protein 85 like(CEP85L)	387119	centrosomal protein 85 like(CEP85L)
NP	NP_CT	CGN	B9EK46	cingulin(CGN)	NP|CGN	794	198.5	1	10.12	22.69	0			57530	cingulin(CGN)
NP	NP_CT	CGNL1	Q0VF96	cingulin like 1(CGNL1)	NP|CGNL1	496	124	1	170.57	1240	0	ENSG00000128849	cingulin like 1(CGNL1)	84952	cingulin like 1(CGNL1)
NP	NP_CT	CKAP5	Q14008	cytoskeleton associated protein 5(CKAP5)	NP|CKAP5	344	86	0.98	3.89	6.31	0			9793	cytoskeleton associated protein 5(CKAP5)
NP	NP_CT	CKB	A0A0S2Z471	creatine kinase B(CKB)	NP|CKB	25	6.25	1	4.62	25	0			1152	creatine kinase B(CKB)
NP	NP_NT	CLTC	A0A087WVQ6	clathrin heavy chain(CLTC)	NP|CLTC	69	17.25	1	22.82	172.5	0			1213	clathrin heavy chain(CLTC)
NP	NP_CT	CNOT1	A5YKK6	CCR4-NOT transcription complex subunit 1(CNOT1)	NP|CNOT1	237	59.25	0.99	4.12	7.29	0			23019	CCR4-NOT transcription complex subunit 1(CNOT1)
NP	NP_NT	COBL	O75128	cordon-bleu WH2 repeat protein(COBL)	NP|COBL	233	58.25	1	80.88	582.5	0	ENSG00000106078	cordon-bleu WH2 repeat protein(COBL)	23242	cordon-bleu WH2 repeat protein(COBL)
NP	NP_CT	COPB1	P53618	coatomer protein complex subunit beta 1(COPB1)	NP|COPB1	29	7.25	0.92	1.3	8.29	0.01			1315	coatomer protein complex subunit beta 1(COPB1)
NP	NP_CT	CP110	A0A024QYV8	CP110 protein, isoform CRA_a	NP|CP110	198	49.5	1	5.14	9.66	0
NP	NP_NT	CPNE5	Q9HCH3	copine 5(CPNE5)	NP|CPNE5	36	9	0.95	2.73	9	0.01	ENSG00000124772	copine 5(CPNE5)	57699	copine 5(CPNE5)
NP	NP_CT	CSPP1	Q1MSJ5	centrosome and spindle pole associated protein 1(CSPP1)	NP|CSPP1	157	39.25	1	56.66	392.5	0	ENSG00000104218	centrosome and spindle pole associated protein 1(CSPP1)	79848	centrosome and spindle pole associated protein 1(CSPP1)
NP	NP_CT	CYLD	A0A024R6T1	CYLD lysine 63 deubiquitinase(CYLD)	NP|CYLD	141	35.25	1	49.44	352.5	0			1540	CYLD lysine 63 deubiquitinase(CYLD)
NP	NP_NT	DDX39B	A0A024RCM3	DExD-box helicase 39B(DDX39B)	NP|DDX39B	68	17	0.99	4.11	11.33	0			7919	DExD-box helicase 39B(DDX39B)
NP	NP_CT	DIP2B	Q9P265	disco interacting protein 2 homolog B(DIP2B)	NP|DIP2B	57	14.25	1	16.93	142.5	0	ENSG00000066084	disco interacting protein 2 homolog B(DIP2B)	57609	disco interacting protein 2 homolog B(DIP2B)
NP	NP_CT	DNM2	P50570	dynamin 2(DNM2)	NP|DNM2	86	21.5	0.99	3.8	13.23	0			1785	dynamin 2(DNM2)
NP	NP_CT	DSP	P15924	desmoplakin(DSP)	NP|DSP	263	65.75	0.89	1.34	4.28	0.01			1832	desmoplakin(DSP)
NP	NP_CT	DZIP3	Q86Y13	DAZ interacting zinc finger protein 3(DZIP3)	NP|DZIP3	72	18	1	21.5	180	0	ENSG00000198919	DAZ interacting zinc finger protein 3(DZIP3)	9666	DAZ interacting zinc finger protein 3(DZIP3)
NP	NP_CT	EGLN1	R4RZ18	egl-9 family hypoxia inducible factor 1(EGLN1)	NP|EGLN1	336	84	0.99	4.66	8.1	0	ENSG00000135766	egl-9 family hypoxia inducible factor 1(EGLN1)	54583	egl-9 family hypoxia inducible factor 1(EGLN1)
NP	NP_CT	ELAVL1	Q15717	ELAV like RNA binding protein 1(ELAVL1)	NP|ELAVL1	33	8.25	0.96	2.86	9.43	0			1994	ELAV like RNA binding protein 1(ELAVL1)
NP	NP_CT	EPS15L1	A0A024R7G6	epidermal growth factor receptor pathway substrate 15 like 1(EPS15L1)	NP|EPS15L1	61	15.25	1	18.46	152.5	0			58513	epidermal growth factor receptor pathway substrate 15 like 1(EPS15L1)
NP	NP_NT	FAM117B	Q6P1L5	family with sequence similarity 117 member B(FAM117B)	NP|FAM117B	30	7.5	0.93	1.86	8.57	0.01	ENSG00000138439	family with sequence similarity 117 member B(FAM117B)	150864	family with sequence similarity 117 member B(FAM117B)
NP	NP_CT	FAM188B	Q4G0A6	family with sequence similarity 188 member B(FAM188B)	NP|FAM188B	40	10	1	15.38	100	0	ENSG00000106125	family with sequence similarity 188 member B(FAM188B)	84182	family with sequence similarity 188 member B(FAM188B)
NP	NP_CT	FAM83G	A6ND36	family with sequence similarity 83 member G(FAM83G)	NP|FAM83G	42	10.5	1	15.38	105	0	ENSG00000188522	family with sequence similarity 83 member G(FAM83G)	644815	family with sequence similarity 83 member G(FAM83G)
NP	NP_NT	FLNA	Q5HY54	filamin A(FLNA)	NP|FLNA	263	65.75	1	95.16	657.5	0			2316	filamin A(FLNA)
NP	NP_CT	FXR1	A0A0F7KYT8	FMR1 autosomal homolog 1(FXR1)	NP|FXR1	104	26	0.94	2.45	4.73	0.01			8087	FMR1 autosomal homolog 1(FXR1)
NP	NP_NT	GEN1	Q17RS7	GEN1, Holliday junction 5' flap endonuclease(GEN1)	NP|GEN1	51	12.75	1	16.74	127.5	0	ENSG00000178295	GEN1, Holliday junction 5' flap endonuclease(GEN1)	348654	GEN1, Holliday junction 5' flap endonuclease(GEN1)
NP	NP_CT	GIT1	Q9Y2X7	GIT ArfGAP 1(GIT1)	NP|GIT1	174	43.5	1	50.88	435	0	ENSG00000108262	GIT ArfGAP 1(GIT1)	28964	GIT ArfGAP 1(GIT1)
NP	NP_NT	GNE	Q6QNY5	glucosamine (UDP-N-acetyl)-2-epimerase/N-acetylmannosamine kinase(GNE)	NP|GNE	46	11.5	1	16.74	115	0	ENSG00000159921	glucosamine (UDP-N-acetyl)-2-epimerase/N-acetylmannosamine kinase(GNE)	10020	glucosamine (UDP-N-acetyl)-2-epimerase/N-acetylmannosamine kinase(GNE)
NP	NP_NT	HACD3	Q9P035	3-hydroxyacyl-CoA dehydratase 3(HACD3)	NP|HACD3	41	10.25	0.93	2.21	7.45	0.01			51495	3-hydroxyacyl-CoA dehydratase 3(HACD3)
NP	NP_CT	HAUS8	Q9BT25	HAUS augmin like complex subunit 8(HAUS8)	NP|HAUS8	35	8.75	1	12.24	87.5	0	ENSG00000131351	HAUS augmin like complex subunit 8(HAUS8)	93323	HAUS augmin like complex subunit 8(HAUS8)
NP	NP_CT	HBS1L	Q9Y450	HBS1 like translational GTPase(HBS1L)	NP|HBS1L	67	16.75	0.86	1.29	4.19	0.01			10767	HBS1 like translational GTPase(HBS1L)
NP	NP_CT	HLCS	P50747	holocarboxylase synthetase(HLCS)	NP|HLCS	84	21	0.96	2.98	5.79	0			3141	holocarboxylase synthetase(HLCS)
NP	NP_NT	HNRNPU	B3KX72	cDNA FLJ44920 fis, clone BRAMY3011501, highly similar to Heterogeneous nuclear ribonucleoprotein U	NP|HNRNPU	40	10	1	7.13	100	0
NP	NP_NT	HNRPAB	B4DMY3	cDNA FLJ60713, highly similar to Homo sapiens heterogeneous nuclear ribonucleoprotein A/B (HNRPAB), transcript variant 1, mRNA	NP|HNRPAB	37	9.25	0.97	3.51	12.33	0
NP	NP_NT	HSPD1	A0A024R3X4	heat shock protein family D (Hsp60) member 1(HSPD1)	NP|HSPD1	99	24.75	0.99	3.88	15.23	0			3329	heat shock protein family D (Hsp60) member 1(HSPD1)
NP	NP_CT	IBTK	B7ZLE0	inhibitor of Bruton tyrosine kinase(IBTK)	NP|IBTK	91	22.75	0.96	2.85	6.74	0			25998	inhibitor of Bruton tyrosine kinase(IBTK)
NP	NP_CT	IFT74	A0PJM7	intraflagellar transport 74(IFT74)	NP|IFT74	338	84.5	0.99	4.2	7.51	0	ENSG00000096872	intraflagellar transport 74(IFT74)	80173	intraflagellar transport 74(IFT74)
NP	NP_CT	INPPL1	O15357	inositol polyphosphate phosphatase like 1(INPPL1)	NP|INPPL1	58	14.5	1	21.5	145	0	ENSG00000165458	inositol polyphosphate phosphatase like 1(INPPL1)	3636	inositol polyphosphate phosphatase like 1(INPPL1)
NP	NP_CT	KATNB1	Q9BVA0	katanin regulatory subunit B1(KATNB1)	NP|KATNB1	20	5	0.99	3.8	20	0	ENSG00000140854	katanin regulatory subunit B1(KATNB1)	10300	katanin regulatory subunit B1(KATNB1)
NP	NP_CT	KIAA0368	J3KN16	KIAA0368(KIAA0368)	NP|KIAA0368	145	36.25	0.98	3.55	8.53	0	ENSG00000136813	KIAA0368(KIAA0368)	23392	KIAA0368(KIAA0368)
NP	NP_CT	KIAA0430	Q9Y4F3	KIAA0430(KIAA0430)	NP|KIAA0430	50	12.5	1	18.46	125	0			9665	KIAA0430(KIAA0430)
NP	NP_CT	KIAA1191	A0A024R7Q7	KIAA1191(KIAA1191)	NP|KIAA1191	38	9.5	1	8.99	95	0			57179	KIAA1191(KIAA1191)
NP	NP_CT	KIAA1217	Q5T5P2	KIAA1217(KIAA1217)	NP|KIAA1217	206	51.5	1	63.86	515	0	ENSG00000120549	KIAA1217(KIAA1217)	56243	KIAA1217(KIAA1217)
NP	NP_CT	KIAA1462	Q9P266	KIAA1462(KIAA1462)	NP|KIAA1462	105	26.25	1	28.97	262.5	0			57608	KIAA1462(KIAA1462)
NP	NP_CT	KIAA1671	Q9BY89	KIAA1671(KIAA1671)	NP|KIAA1671	1142	285.5	1	11.83	18.57	0			85379	KIAA1671(KIAA1671)
NP	NP_CT	KIF14	Q15058	kinesin family member 14(KIF14)	NP|KIF14	1204	301	1	10.33	22.09	0			9928	kinesin family member 14(KIF14)
NP	NP_NT	KNL1	Q8NG31	kinetochore scaffold 1(KNL1)	NP|KNL1	440	110	0.99	4.46	7.52	0	ENSG00000137812	kinetochore scaffold 1(KNL1)	57082	kinetochore scaffold 1(KNL1)
NP	NP_CT	LASP1	A0A024R1S8	LIM and SH3 protein 1(LASP1)	NP|LASP1	31	7.75	0.96	3.1	10.33	0			3927	LIM and SH3 protein 1(LASP1)
NP	NP_CT	LATS1	O95835	large tumor suppressor kinase 1(LATS1)	NP|LATS1	65	16.25	1	19.98	162.5	0			9113	large tumor suppressor kinase 1(LATS1)
NP	NP_CT	LMO7	B7Z8W3	cDNA FLJ53272, highly similar to Homo sapiens LIM domain 7 (LMO7), mRNA	NP|LMO7	56	14	1	18.46	140	0	ENSG00000136153	LIM domain 7(LMO7)
NP	NP_NT	LPP	A0A087WZF1	LIM domain containing preferred translocation partner in lipoma(LPP)	NP|LPP	133	33.25	0.98	3.51	7.82	0			4026	LIM domain containing preferred translocation partner in lipoma(LPP)
NP	NP_CT	LRIF1	Q5T3J3	ligand dependent nuclear receptor interacting factor 1(LRIF1)	NP|LRIF1	54	13.5	0.99	3.96	18	0			55791	ligand dependent nuclear receptor interacting factor 1(LRIF1)
NP	NP_NT	LUZP1	A0A024RAC0	leucine zipper protein 1(LUZP1)	NP|LUZP1	276	69	0.99	4.69	12	0	ENSG00000169641	leucine zipper protein 1(LUZP1)	7798	leucine zipper protein 1(LUZP1)
NP	NP_CT	MAP3K7	Q5U0D0	Mitogen-activated protein kinase kinase kinase 7	NP|MAP3K7	112	28	1	39.26	280	0
NP	NP_CT	MAP7D3	Q8IWC1	MAP7 domain containing 3(MAP7D3)	NP|MAP7D3	258	64.5	1	93.91	645	0	ENSG00000129680	MAP7 domain containing 3(MAP7D3)	79649	MAP7 domain containing 3(MAP7D3)
NP	NP_NT	MIF	I4AY87	macrophage migration inhibitory factor (glycosylation-inhibiting factor)(MIF)	NP|MIF	15	3.75	1	5.39	37.5	0			4282	macrophage migration inhibitory factor (glycosylation-inhibiting factor)(MIF)
NP	NP_CT	MIS18BP1	Q6P0N0	MIS18 binding protein 1(MIS18BP1)	NP|MIS18BP1	68	17	1	23	170	0	ENSG00000129534	MIS18 binding protein 1(MIS18BP1)	55320	MIS18 binding protein 1(MIS18BP1)
NP	NP_CT	MPHOSPH9	Q99550	M-phase phosphoprotein 9(MPHOSPH9)	NP|MPHOSPH9	258	64.5	1	83.92	645	0	ENSG00000051825	M-phase phosphoprotein 9(MPHOSPH9)	10198	M-phase phosphoprotein 9(MPHOSPH9)
NP	NP_NT	MSN	V9HWC0	moesin(MSN)	NP|MSN	50	12.5	1	18.28	125	0	ENSG00000147065	moesin(MSN)	4478	moesin(MSN)
NP	NP_CT	MTHFD1	B7Z809	C-1-tetrahydrofolate synthase, cytoplasmic	NP|MTHFD1	60	15	1	21.5	150	0	ENSG00000100714	methylenetetrahydrofolate dehydrogenase, cyclohydrolase and formyltetrahydrofolate synthetase 1(MTHFD1)
NP	NP_CT	MTMR6	Q9Y217	myotubularin related protein 6(MTMR6)	NP|MTMR6	32	8	0.93	2.01	8	0.01			9107	myotubularin related protein 6(MTMR6)
NP	NP_CT	NAV1	Q8NEY1	neuron navigator 1(NAV1)	NP|NAV1	269	67.25	1	86.78	672.5	0	ENSG00000134369	neuron navigator 1(NAV1)	89796	neuron navigator 1(NAV1)
NP	NP_CT	NBN	A6H8Y5	nibrin(NBN)	NP|NBN	196	49	0.98	3.82	9.8	0			4683	nibrin(NBN)
NP	NP_CT	NCKAP5L	Q9HCH0	NCK associated protein 5 like(NCKAP5L)	NP|NCKAP5L	104	26	1	34.87	260	0	ENSG00000167566	NCK associated protein 5 like(NCKAP5L)	57701	NCK associated protein 5 like(NCKAP5L)
NP	NP_CT	NCOA6	F6M2K3	nuclear receptor coactivator 6(NCOA6)	NP|NCOA6	165	41.25	1	49.44	412.5	0			23054	nuclear receptor coactivator 6(NCOA6)
NP	NP_CT	NEDD1	A0A024RBE5	neural precursor cell expressed, developmentally down-regulated 1(NEDD1)	NP|NEDD1	346	86.5	1	14.06	98.86	0	ENSG00000139350	neural precursor cell expressed, developmentally down-regulated 1(NEDD1)	121441	neural precursor cell expressed, developmentally down-regulated 1(NEDD1)
NP	NP_CT	NFRKB	A0A024R3K9	nuclear factor related to kappaB binding protein(NFRKB)	NP|NFRKB	84	21	1	28.97	210	0	ENSG00000170322	nuclear factor related to kappaB binding protein(NFRKB)	4798	nuclear factor related to kappaB binding protein(NFRKB)
NP	NP_CT	NFX1	Q12986	nuclear transcription factor, X-box binding 1(NFX1)	NP|NFX1	48	12	1	18.46	120	0			4799	nuclear transcription factor, X-box binding 1(NFX1)
NP	NP_NT	NMT1	Q96HI4	N-myristoyltransferase 1(NMT1)	NP|NMT1	23	5.75	1	7.13	57.5	0	ENSG00000136448	N-myristoyltransferase 1(NMT1)	4836	N-myristoyltransferase 1(NMT1)
NP	NP_CT	OCRL	Q504W7	OCRL, inositol polyphosphate-5-phosphatase(OCRL)	NP|OCRL	79	19.75	0.95	2.65	6.08	0.01			4952	OCRL, inositol polyphosphate-5-phosphatase(OCRL)
NP	NP_CT	PALLD	Q8WX93	palladin, cytoskeletal associated protein(PALLD)	NP|PALLD	205	51.25	0.88	0.88	4.27	0.01			23022	palladin, cytoskeletal associated protein(PALLD)
NP	NP_NT	PCMT1	A0A0A0MRJ6	protein-L-isoaspartate (D-aspartate) O-methyltransferase(PCMT1)	NP|PCMT1	77	19.25	0.91	1.61	4.28	0.01			5110	protein-L-isoaspartate (D-aspartate) O-methyltransferase(PCMT1)
NP	NP_CT	PDLIM5	B7Z481	PDZ and LIM domain 5(PDLIM5)	NP|PDLIM5	88	22	1	31.93	220	0	ENSG00000163110	PDZ and LIM domain 5(PDLIM5)	10611	PDZ and LIM domain 5(PDLIM5)
NP	NP_CT	PEAK1	Q9H792	pseudopodium enriched atypical kinase 1(PEAK1)	NP|PEAK1	89	22.25	1	30.45	222.5	0	ENSG00000173517	pseudopodium enriched atypical kinase 1(PEAK1)	79834	pseudopodium enriched atypical kinase 1(PEAK1)
NP	NP_CT	PIK3C2A	L7RRS0	phosphatidylinositol-4-phosphate 3-kinase catalytic subunit type 2 alpha(PIK3C2A)	NP|PIK3C2A	139	34.75	1	47.99	347.5	0	ENSG00000011405	phosphatidylinositol-4-phosphate 3-kinase catalytic subunit type 2 alpha(PIK3C2A)	5286	phosphatidylinositol-4-phosphate 3-kinase catalytic subunit type 2 alpha(PIK3C2A)
NP	NP_CT	PLEKHG1	Q5JYA6	pleckstrin homology and RhoGEF domain containing G1(PLEKHG1)	NP|PLEKHG1	108	27	1	37.8	270	0	ENSG00000120278	pleckstrin homology and RhoGEF domain containing G1(PLEKHG1)	57480	pleckstrin homology and RhoGEF domain containing G1(PLEKHG1)
NP	NP_CT	POC5	Q8NA72	POC5 centriolar protein(POC5)	NP|POC5	312	78	1	111	780	0	ENSG00000152359	POC5 centriolar protein(POC5)	134359	POC5 centriolar protein(POC5)
NP	NP_NT	POLR3D	P05423	RNA polymerase III subunit D(POLR3D)	NP|POLR3D	37	9.25	1	10.45	92.5	0	ENSG00000168495	RNA polymerase III subunit D(POLR3D)	661	RNA polymerase III subunit D(POLR3D)
NP	NP_CT	PPM1A	P35813	protein phosphatase, Mg2+/Mn2+ dependent 1A(PPM1A)	NP|PPM1A	46	11.5	0.97	2.53	10.22	0	ENSG00000100614	protein phosphatase, Mg2+/Mn2+ dependent 1A(PPM1A)	5494	protein phosphatase, Mg2+/Mn2+ dependent 1A(PPM1A)
NP	NP_NT	PPP1R2P3	G1AUC5	protein phosphatase 1 regulatory inhibitor subunit 2 pseudogene 3(PPP1R2P3)	NP|PPP1R2P3	15	3.75	0.89	1.33	10	0.01			153743	protein phosphatase 1 regulatory inhibitor subunit 2 pseudogene 3(PPP1R2P3)
NP	NP_NT	PPP2R2A	A0A140VJT0	protein phosphatase 2 regulatory subunit Balpha(PPP2R2A)	NP|PPP2R2A	25	6.25	1	8.81	62.5	0	ENSG00000221914	protein phosphatase 2 regulatory subunit Balpha(PPP2R2A)	5520	protein phosphatase 2 regulatory subunit Balpha(PPP2R2A)
NP	NP_CT	PPP2R5C	Q13362	protein phosphatase 2 regulatory subunit B'gamma(PPP2R5C)	NP|PPP2R5C	285	71.25	1	95.34	712.5	0	ENSG00000078304	protein phosphatase 2 regulatory subunit B'gamma(PPP2R5C)	5527	protein phosphatase 2 regulatory subunit B'gamma(PPP2R5C)
NP	NP_CT	PPP2R5D	A0A024RD11	protein phosphatase 2 regulatory subunit B'delta(PPP2R5D)	NP|PPP2R5D	376	94	1	15.3	125.33	0	ENSG00000112640	protein phosphatase 2 regulatory subunit B'delta(PPP2R5D)	5528	protein phosphatase 2 regulatory subunit B'delta(PPP2R5D)
NP	NP_CT	PRRC2B	Q5JSZ5	proline rich coiled-coil 2B(PRRC2B)	NP|PRRC2B	62	15.5	0.91	2.08	4.59	0.01			84726	proline rich coiled-coil 2B(PRRC2B)
NP	NP_CT	Q59FI9	Q59FI9	60S ribosomal protein L12	NP|Q59FI9	13	3.25	0.99	3.73	32.5	0
NP	NP_CT	RACK1	E9KL35	receptor for activated C kinase 1(RACK1)	NP|RACK1	50	12.5	1	16.93	125	0			10399	receptor for activated C kinase 1(RACK1)
NP	NP_NT	RBBP4	Q09028	RB binding protein 4, chromatin remodeling factor(RBBP4)	NP|RBBP4	114	28.5	1	40.54	285	0	ENSG00000162521	RB binding protein 4, chromatin remodeling factor(RBBP4)	5928	RB binding protein 4, chromatin remodeling factor(RBBP4)
NP	NP_NT	RBBP7	Q6FHQ0	RB binding protein 7, chromatin remodeling factor(RBBP7)	NP|RBBP7	225	56.25	1	79.45	562.5	0	ENSG00000102054	RB binding protein 7, chromatin remodeling factor(RBBP7)	5931	RB binding protein 7, chromatin remodeling factor(RBBP7)
NP	NP_CT	RNF219	Q5W0B1	ring finger protein 219(RNF219)	NP|RNF219	273	68.25	0.99	3.86	5.93	0			79596	ring finger protein 219(RNF219)
NP	NP_CT	RPL13	Q6NZ55	ribosomal protein L13(RPL13)	NP|RPL13	22	5.5	1	8.99	55	0			6137	ribosomal protein L13(RPL13)
NP	NP_CT	RPL13A	M0QYS1	ribosomal protein L13a(RPL13A)	NP|RPL13A	38	9.5	1	15.38	95	0			23521	ribosomal protein L13a(RPL13A)
NP	NP_NT	RPL17	A0A024R261	ribosomal protein L17(RPL17)	NP|RPL17	43	10.75	1	16.74	107.5	0	ENSG00000265681	ribosomal protein L17(RPL17)	6139	ribosomal protein L17(RPL17)
NP	NP_CT	RPL18A	M0R3D6	ribosomal protein L18a(RPL18A)	NP|RPL18A	21	5.25	1	5.57	52.5	0			6142	ribosomal protein L18a(RPL18A)
NP	NP_NT	RPL23	A0A024R1Q8	ribosomal protein L23(RPL23)	NP|RPL23	40	10	1	4.87	26.67	0			9349	ribosomal protein L23(RPL23)
NP	NP_CT	RPL4	B4DMJ6	60S ribosomal protein L4	NP|RPL4	39	9.75	1	10.63	97.5	0
NP	NP_NT	RPL5	A2RUM7	ribosomal protein L5(RPL5)	NP|RPL5	55	13.75	1	19.8	137.5	0			6125	ribosomal protein L5(RPL5)
NP	NP_CT	RPL6	A0A024RBK3	ribosomal protein L6(RPL6)	NP|RPL6	82	20.5	1	5.12	27.33	0			6128	ribosomal protein L6(RPL6)
NP	NP_NT	RPL7A	P62424	ribosomal protein L7a(RPL7A)	NP|RPL7A	36	9	1	8.81	90	0			6130	ribosomal protein L7a(RPL7A)
NP	NP_CT	RPL9	H0Y9V9	ribosomal protein L9(RPL9)	NP|RPL9	20	5	1	7.31	50	0			6133	ribosomal protein L9(RPL9)
NP	NP_NT	RPS10	P46783	ribosomal protein S10(RPS10)	NP|RPS10	42	10.5	1	15.2	105	0	ENSG00000124614	ribosomal protein S10(RPS10)	6204	ribosomal protein S10(RPS10)
NP	NP_CT	RPS11	P62280	ribosomal protein S11(RPS11)	NP|RPS11	71	17.75	0.99	4.8	12.91	0			6205	ribosomal protein S11(RPS11)
NP	NP_NT	RPS12	P25398	ribosomal protein S12(RPS12)	NP|RPS12	35	8.75	1	10.45	87.5	0	ENSG00000112306	ribosomal protein S12(RPS12)	6206	ribosomal protein S12(RPS12)
NP	NP_NT	RPS14	P62263	ribosomal protein S14(RPS14)	NP|RPS14	34	8.5	1	12.05	85	0	ENSG00000164587	ribosomal protein S14(RPS14)	6208	ribosomal protein S14(RPS14)
NP	NP_NT	RPS15A	B2R4W8	ribosomal protein S15a(RPS15A)	NP|RPS15A	60	15	0.98	3.3	10	0			6210	ribosomal protein S15a(RPS15A)
NP	NP_CT	RPS2	Q3KQT6	ribosomal protein S2(RPS2)	NP|RPS2	53	13.25	1	15.38	132.5	0	ENSG00000140988	ribosomal protein S2(RPS2)	6187	ribosomal protein S2(RPS2)
NP	NP_NT	RPS20	P60866	ribosomal protein S20(RPS20)	NP|RPS20	33	8.25	1	10.45	82.5	0	ENSG00000008988	ribosomal protein S20(RPS20)	6224	ribosomal protein S20(RPS20)
NP	NP_NT	RPS23	A8K517	ribosomal protein S23(RPS23)	NP|RPS23	36	9	0.94	1.96	5.54	0.01			6228	ribosomal protein S23(RPS23)
NP	NP_NT	RPS27	Q5T4L4	ribosomal protein S27(RPS27)	NP|RPS27	37	9.25	1	10.45	92.5	0	ENSG00000177954	ribosomal protein S27(RPS27)	6232	ribosomal protein S27(RPS27)
NP	NP_NT	RPS27A	B2RDW1	ribosomal protein S27a(RPS27A)	NP|RPS27A	108	27	0.97	3.2	7.71	0			6233	ribosomal protein S27a(RPS27A)
NP	NP_NT	RPS28	B2R4R9	ribosomal protein S28(RPS28)	NP|RPS28	22	5.5	1	7.13	55	0	ENSG00000233927	ribosomal protein S28(RPS28)	6234	ribosomal protein S28(RPS28)
NP	NP_NT	RPS4X	B2R491	ribosomal protein S4, X-linked(RPS4X)	NP|RPS4X	31	7.75	1	10.45	77.5	0			6191	ribosomal protein S4, X-linked(RPS4X)
NP	NP_NT	RPS6	A2A3R6	ribosomal protein S6(RPS6)	NP|RPS6	43	10.75	0.94	2.34	7.17	0.01			6194	ribosomal protein S6(RPS6)
NP	NP_CT	RPS8	Q5JR94	ribosomal protein S8(RPS8)	NP|RPS8	37	9.25	0.99	3.81	12.33	0			6202	ribosomal protein S8(RPS8)
NP	NP_CT	SCYL2	A0A0U1RQQ9	SCY1 like pseudokinase 2(SCYL2)	NP|SCYL2	37	9.25	0.98	3.36	14.8	0			55681	SCY1 like pseudokinase 2(SCYL2)
NP	NP_CT	SDCCAG3	Q96C92	serologically defined colon cancer antigen 3(SDCCAG3)	NP|SDCCAG3	73	18.25	1	26	182.5	0	ENSG00000165689	serologically defined colon cancer antigen 3(SDCCAG3)	10807	serologically defined colon cancer antigen 3(SDCCAG3)
NP	NP_CT	SH3PXD2B	A1X283	SH3 and PX domains 2B(SH3PXD2B)	NP|SH3PXD2B	33	8.25	1	13.82	82.5	0	ENSG00000174705	SH3 and PX domains 2B(SH3PXD2B)	285590	SH3 and PX domains 2B(SH3PXD2B)
NP	NP_CT	SIPA1L2	Q9P2F8	signal induced proliferation associated 1 like 2(SIPA1L2)	NP|SIPA1L2	68	17	1	24.5	170	0	ENSG00000116991	signal induced proliferation associated 1 like 2(SIPA1L2)	57568	signal induced proliferation associated 1 like 2(SIPA1L2)
NP	NP_CT	SIPA1L3	B2RWP0	signal induced proliferation associated 1 like 3(SIPA1L3)	NP|SIPA1L3	190	47.5	1	65.3	475	0			23094	signal induced proliferation associated 1 like 3(SIPA1L3)
NP	NP_NT	SKA1	A0A024R294	spindle and kinetochore associated complex subunit 1(SKA1)	NP|SKA1	29	7.25	1	8.81	72.5	0	ENSG00000154839	spindle and kinetochore associated complex subunit 1(SKA1)	220134	spindle and kinetochore associated complex subunit 1(SKA1)
NP	NP_CT	SKA3	Q8IX90	spindle and kinetochore associated complex subunit 3(SKA3)	NP|SKA3	209	52.25	1	4.81	8.53	0			221150	spindle and kinetochore associated complex subunit 3(SKA3)
NP	NP_CT	SMAP1	B2RDK5	cDNA, FLJ96655, highly similar to Homo sapiens stromal membrane-associated protein 1 (SMAP1), mRNA	NP|SMAP1	24	6	0.87	1.11	5.33	0.01
NP	NP_CT	SMG7	Q92540	SMG7, nonsense mediated mRNA decay factor(SMG7)	NP|SMG7	82	20.5	0.98	3.95	11.71	0	ENSG00000116698	SMG7, nonsense mediated mRNA decay factor(SMG7)	9887	SMG7, nonsense mediated mRNA decay factor(SMG7)
NP	NP_CT	SMG9	A0A024R0Q0	SMG9, nonsense mediated mRNA decay factor(SMG9)	NP|SMG9	36	9	0.83	1.25	4	0.01			56006	SMG9, nonsense mediated mRNA decay factor(SMG9)
NP	NP_NT	SNAP29	O95721	synaptosome associated protein 29(SNAP29)	NP|SNAP29	70	17.5	1	5.26	11.67	0			9342	synaptosome associated protein 29(SNAP29)
NP	NP_CT	SND1	A0A140VK49	staphylococcal nuclease and tudor domain containing 1(SND1)	NP|SND1	84	21	1	24.5	210	0	ENSG00000197157	staphylococcal nuclease and tudor domain containing 1(SND1)	27044	staphylococcal nuclease and tudor domain containing 1(SND1)
NP	NP_NT	SNX3	O60493	sorting nexin 3(SNX3)	NP|SNX3	23	5.75	0.94	2.41	9.2	0.01	ENSG00000112335	sorting nexin 3(SNX3)	8724	sorting nexin 3(SNX3)
NP	NP_NT	SOS1	G5E9C8	SOS Ras/Rac guanine nucleotide exchange factor 1(SOS1)	NP|SOS1	36	9	1	13.64	90	0	ENSG00000115904	SOS Ras/Rac guanine nucleotide exchange factor 1(SOS1)	6654	SOS Ras/Rac guanine nucleotide exchange factor 1(SOS1)
NP	NP_NT	SRSF3	A0A087X2D0	serine and arginine rich splicing factor 3(SRSF3)	NP|SRSF3	16	4	0.99	3.55	40	0	ENSG00000112081	serine and arginine rich splicing factor 3(SRSF3)	6428	serine and arginine rich splicing factor 3(SRSF3)
NP	NP_CT	SUMO1	B8ZZN6	small ubiquitin-like modifier 1(SUMO1)	NP|SUMO1	14	3.5	1	5.57	35	0			7341	small ubiquitin-like modifier 1(SUMO1)
NP	NP_CT	SYNJ2	O15056	synaptojanin 2(SYNJ2)	NP|SYNJ2	130	32.5	1	45.09	325	0	ENSG00000078269	synaptojanin 2(SYNJ2)	8871	synaptojanin 2(SYNJ2)
NP	NP_CT	TAB1	A8K6K3	TGF-beta activated kinase 1 (MAP3K7) binding protein 1(TAB1)	NP|TAB1	69	17.25	1	23	172.5	0			10454	TGF-beta activated kinase 1 (MAP3K7) binding protein 1(TAB1)
NP	NP_CT	TAB2	Q9NYJ8	TGF-beta activated kinase 1/MAP3K7 binding protein 2(TAB2)	NP|TAB2	175	43.75	1	6.06	26.92	0			23118	TGF-beta activated kinase 1/MAP3K7 binding protein 2(TAB2)
NP	NP_CT	TAB3	Q8N5C8	TGF-beta activated kinase 1/MAP3K7 binding protein 3(TAB3)	NP|TAB3	40	10	1	12.24	100	0	ENSG00000157625	TGF-beta activated kinase 1/MAP3K7 binding protein 3(TAB3)	257397	TGF-beta activated kinase 1/MAP3K7 binding protein 3(TAB3)
NP	NP_CT	TANC1	Q9C0D5	tetratricopeptide repeat, ankyrin repeat and coiled-coil containing 1(TANC1)	NP|TANC1	496	124	1	10.23	70.86	0	ENSG00000115183	tetratricopeptide repeat, ankyrin repeat and coiled-coil containing 1(TANC1)	85461	tetratricopeptide repeat, ankyrin repeat and coiled-coil containing 1(TANC1)
NP	NP_CT	TJP1	G5E9E7	tight junction protein 1(TJP1)	NP|TJP1	1294	323.5	1	7.24	13.01	0			7082	tight junction protein 1(TJP1)
NP	NP_CT	TJP2	A0A024R233	tight junction protein 2(TJP2)	NP|TJP2	366	91.5	0.99	4.14	8.82	0			9414	tight junction protein 2(TJP2)
NP	NP_CT	TMEM263	Q8WUH6	transmembrane protein 263(TMEM263)	NP|TMEM263	37	9.25	1	13.82	92.5	0			90488	transmembrane protein 263(TMEM263)
NP	NP_CT	TNFRSF1B	Q8IVS6	TNF receptor superfamily member 1B(TNFRSF1B)	NP|TNFRSF1B	21	5.25	0.92	1.99	7	0.01			7133	TNF receptor superfamily member 1B(TNFRSF1B)
NP	NP_CT	TNRC6B	Q9UPQ9	trinucleotide repeat containing 6B(TNRC6B)	NP|TNRC6B	280	70	1	83.92	700	0			23112	trinucleotide repeat containing 6B(TNRC6B)
NP	NP_CT	TNRC6C	A0A1B0GU24	trinucleotide repeat containing 6C(TNRC6C)	NP|TNRC6C	126	31.5	1	46.54	315	0			57690	trinucleotide repeat containing 6C(TNRC6C)
NP	NP_CT	TP53	B6E4X6	Cellular tumor antigen p53	NP|TP53	291	72.75	1	106.73	727.5	0	ENSG00000141510	tumor protein p53(TP53)
NP	NP_NT	TPT1	A0A0B4J2C3	tumor protein, translationally-controlled 1(TPT1)	NP|TPT1	36	9	1	13.64	90	0	ENSG00000133112	tumor protein, translationally-controlled 1(TPT1)	7178	tumor protein, translationally-controlled 1(TPT1)
NP	NP_CT	TRIM25	Q59GW5	Tripartite motif-containing 25 variant	NP|TRIM25	250	62.5	0.99	4.54	10.64	0
NP	NP_CT	TRIP6	Q15654	thyroid hormone receptor interactor 6(TRIP6)	NP|TRIP6	24	6	1	5.57	60	0			7205	thyroid hormone receptor interactor 6(TRIP6)
NP	NP_NT	TRPS1	Q9UHF7	transcriptional repressor GATA binding 1(TRPS1)	NP|TRPS1	107	26.75	1	36.15	267.5	0			7227	transcriptional repressor GATA binding 1(TRPS1)
NP	NP_CT	TTF2	A0A024R0F1	transcription termination factor 2(TTF2)	NP|TTF2	474	118.5	1	6.15	11.15	0	ENSG00000116830	transcription termination factor 2(TTF2)	8458	transcription termination factor 2(TTF2)
NP	NP_CT	TTK	P33981	TTK protein kinase(TTK)	NP|TTK	137	34.25	1	6.74	39.14	0			7272	TTK protein kinase(TTK)
NP	NP_CT	TUBGCP2	Q9BSJ2	tubulin gamma complex associated protein 2(TUBGCP2)	NP|TUBGCP2	128	32	1	40.72	320	0	ENSG00000130640	tubulin gamma complex associated protein 2(TUBGCP2)	10844	tubulin gamma complex associated protein 2(TUBGCP2)
NP	NP_CT	TUBGCP3	Q96CW5	tubulin gamma complex associated protein 3(TUBGCP3)	NP|TUBGCP3	67	16.75	1	24.5	167.5	0	ENSG00000126216	tubulin gamma complex associated protein 3(TUBGCP3)	10426	tubulin gamma complex associated protein 3(TUBGCP3)
NP	NP_CT	TUBGCP4	Q9UGJ1	tubulin gamma complex associated protein 4(TUBGCP4)	NP|TUBGCP4	61	15.25	1	16.93	152.5	0	ENSG00000137822	tubulin gamma complex associated protein 4(TUBGCP4)	27229	tubulin gamma complex associated protein 4(TUBGCP4)
NP	NP_CT	TUFM	P49411	Tu translation elongation factor, mitochondrial(TUFM)	NP|TUFM	68	17	0.97	3.12	6.48	0			7284	Tu translation elongation factor, mitochondrial(TUFM)
NP	NP_CT	TUFT1	B7Z4Y1	tuftelin 1(TUFT1)	NP|TUFT1	46	11.5	1	13.82	115	0	ENSG00000143367	tuftelin 1(TUFT1)	7286	tuftelin 1(TUFT1)
NP	NP_CT	TXLNG	Q9NUQ3	taxilin gamma(TXLNG)	NP|TXLNG	31	7.75	1	10.63	77.5	0			55787	taxilin gamma(TXLNG)
NP	NP_CT	UBAP2	Q5T6F2	ubiquitin associated protein 2(UBAP2)	NP|UBAP2	89	22.25	1	5.27	25.43	0			55833	ubiquitin associated protein 2(UBAP2)
NP	NP_CT	UBN2	Q6ZU65	ubinuclein 2(UBN2)	NP|UBN2	114	28.5	1	40.72	285	0	ENSG00000157741	ubinuclein 2(UBN2)	254048	ubinuclein 2(UBN2)
NP	NP_NT	UPF1	A0A024R7L5	UPF1, RNA helicase and ATPase(UPF1)	NP|UPF1	26	6.5	0.9	1.83	6.5	0.01			5976	UPF1, RNA helicase and ATPase(UPF1)
NP	NP_CT	USP53	Q70EK8	ubiquitin specific peptidase 53(USP53)	NP|USP53	59	14.75	1	18.46	147.5	0	ENSG00000145390	ubiquitin specific peptidase 53(USP53)	54532	ubiquitin specific peptidase 53(USP53)
NP	NP_CT	USP54	Q70EL1	ubiquitin specific peptidase 54(USP54)	NP|USP54	52	13	1	19.98	130	0			159195	ubiquitin specific peptidase 54(USP54)
NP	NP_CT	VARS	A0A140T936	valyl-tRNA synthetase(VARS)	NP|VARS	50	12.5	0.82	0.56	3.57	0.01			7407	valyl-tRNA synthetase(VARS)
NP	NP_NT	VDAC3	Q9Y277	voltage dependent anion channel 3(VDAC3)	NP|VDAC3	33	8.25	1	8.81	82.5	0			7419	voltage dependent anion channel 3(VDAC3)
NP	NP_CT	WDCP	Q9H6R7	WD repeat and coiled coil containing(WDCP)	NP|WDCP	227	56.75	1	7.34	11.07	0			80304	WD repeat and coiled coil containing(WDCP)
NP	NP_CT	YTHDC2	Q9H6S0	YTH domain containing 2(YTHDC2)	NP|YTHDC2	55	13.75	0.95	2.45	6.88	0.01			64848	YTH domain containing 2(YTHDC2)
NP	NP_CT	ZC3H7A	Q8IWR0	zinc finger CCCH-type containing 7A(ZC3H7A)	NP|ZC3H7A	66	16.5	1	21.5	165	0	ENSG00000122299	zinc finger CCCH-type containing 7A(ZC3H7A)	29066	zinc finger CCCH-type containing 7A(ZC3H7A)
NP	NP_CT	ZMYM1	B4DSJ9	zinc finger MYM-type containing 1(ZMYM1)	NP|ZMYM1	93	23.25	0.95	2.73	6	0.01	ENSG00000197056	zinc finger MYM-type containing 1(ZMYM1)	79830	zinc finger MYM-type containing 1(ZMYM1)
NP	NP_NT	ZNF507	Q8TCN5	zinc finger protein 507(ZNF507)	NP|ZNF507	101	25.25	1	33.22	252.5	0	ENSG00000168813	zinc finger protein 507(ZNF507)	22847	zinc finger protein 507(ZNF507)
VP24	VP24_NT	ACOT7	O00154	acyl-CoA thioesterase 7(ACOT7)	VP24|ACOT7	42	10.5	1	14.97	105	0			11332	acyl-CoA thioesterase 7(ACOT7)
VP24	VP24_NT	AGO2	A4FVC0	argonaute 2, RISC catalytic component(AGO2)	VP24|AGO2	51	12.75	1	19.57	127.5	0			27161	argonaute 2, RISC catalytic component(AGO2)
VP24	VP24_CT	BCCIP	Q9P287	BRCA2 and CDKN1A interacting protein(BCCIP)	VP24|BCCIP	142	35.5	0.99	4.16	11.83	0	ENSG00000107949	BRCA2 and CDKN1A interacting protein(BCCIP)	56647	BRCA2 and CDKN1A interacting protein(BCCIP)
VP24	VP24_NT	BTF3	P20290	basic transcription factor 3(BTF3)	VP24|BTF3	26	6.5	1	4.33	17.33	0			689	basic transcription factor 3(BTF3)
VP24	VP24_CT	CACUL1	Q86Y37	CDK2 associated cullin domain 1(CACUL1)	VP24|CACUL1	87	21.75	1	31.27	217.5	0	ENSG00000151893	CDK2 associated cullin domain 1(CACUL1)	143384	CDK2 associated cullin domain 1(CACUL1)
VP24	VP24_CT	CCAR2	B3KTJ9	Cell cycle and apoptosis regulator protein 2	VP24|CCAR2	198	49.5	0.96	2.72	5.91	0	ENSG00000158941	cell cycle and apoptosis regulator 2(CCAR2)
VP24	VP24_NT	CNOT1	A5YKK6	CCR4-NOT transcription complex subunit 1(CNOT1)	VP24|CNOT1	160	40	0.92	1.89	4.92	0.01			23019	CCR4-NOT transcription complex subunit 1(CNOT1)
VP24	VP24_CT	CSE1L	P55060	chromosome segregation 1 like(CSE1L)	VP24|CSE1L	876	219	1	6.46	10.19	0	ENSG00000124207	chromosome segregation 1 like(CSE1L)	1434	chromosome segregation 1 like(CSE1L)
VP24	VP24_NT	DDX39B	A0A024RCM3	DExD-box helicase 39B(DDX39B)	VP24|DDX39B	63	15.75	0.98	3.17	10.5	0			7919	DExD-box helicase 39B(DDX39B)
VP24	VP24_NT	EIF2S2	B5BU01	eukaryotic translation initiation factor 2 subunit beta(EIF2S2)	VP24|EIF2S2	16	4	1	5.16	40	0	ENSG00000125977	eukaryotic translation initiation factor 2 subunit beta(EIF2S2)	8894	eukaryotic translation initiation factor 2 subunit beta(EIF2S2)
VP24	VP24_CT	EIF5A	I3L397	eukaryotic translation initiation factor 5A(EIF5A)	VP24|EIF5A	44	11	1	16.27	110	0			1984	eukaryotic translation initiation factor 5A(EIF5A)
VP24	VP24_NT	ESYT1	A0A024RB16	extended synaptotagmin 1(ESYT1)	VP24|ESYT1	209	52.25	0.94	2.68	4.98	0.01			23344	extended synaptotagmin 1(ESYT1)
VP24	VP24_NT	F4ZW65	F4ZW65	NF90b	VP24|F4ZW65	131	32.75	0.95	2.79	5.95	0.01
VP24	VP24_CT	GATAD2B	A0A0U1RRM1	GATA zinc finger domain containing 2B(GATAD2B)	VP24|GATAD2B	86	21.5	0.94	2.42	6.37	0.01	ENSG00000143614	GATA zinc finger domain containing 2B(GATAD2B)	57459	GATA zinc finger domain containing 2B(GATAD2B)
VP24	VP24_CT	GTF2A1	P52655	general transcription factor IIA subunit 1(GTF2A1)	VP24|GTF2A1	59	14.75	1	20.84	147.5	0	ENSG00000165417	general transcription factor IIA subunit 1(GTF2A1)	2957	general transcription factor IIA subunit 1(GTF2A1)
VP24	VP24_CT	ICE1	Q9Y2F5	interactor of little elongation complex ELL subunit 1(ICE1)	VP24|ICE1	214	53.5	1	67.52	535	0	ENSG00000164151	interactor of little elongation complex ELL subunit 1(ICE1)	23379	interactor of little elongation complex ELL subunit 1(ICE1)
VP24	VP24_CT	ICE2	A0A024R5V9	interactor of little elongation complex ELL subunit 2(ICE2)	VP24|ICE2	78	19.5	1	25.34	195	0	ENSG00000128915	interactor of little elongation complex ELL subunit 2(ICE2)	79664	interactor of little elongation complex ELL subunit 2(ICE2)
VP24	VP24_NT	IGF2BP2	F8W930	insulin like growth factor 2 mRNA binding protein 2(IGF2BP2)	VP24|IGF2BP2	63	15.75	0.95	2.27	7.88	0.01	ENSG00000073792	insulin like growth factor 2 mRNA binding protein 2(IGF2BP2)	10644	insulin like growth factor 2 mRNA binding protein 2(IGF2BP2)
VP24	VP24_NT	IPO9	Q96P70	importin 9(IPO9)	VP24|IPO9	21	5.25	1	6.91	52.5	0	ENSG00000198700	importin 9(IPO9)	55705	importin 9(IPO9)
VP24	VP24_NT	JPH1	Q4KMX3	junctophilin 1(JPH1)	VP24|JPH1	65	16.25	1	19.57	162.5	0	ENSG00000104369	junctophilin 1(JPH1)	56704	junctophilin 1(JPH1)
VP24	VP24_CT	KPNA1	P52294	karyopherin subunit alpha 1(KPNA1)	VP24|KPNA1	580	145	1	203.86	1450	0	ENSG00000114030	karyopherin subunit alpha 1(KPNA1)	3836	karyopherin subunit alpha 1(KPNA1)
VP24	VP24_NT	KPNA2	Q6NVW7	karyopherin subunit alpha 2(KPNA2)	VP24|KPNA2	200	50	1	67.76	500	0	ENSG00000182481	karyopherin subunit alpha 2(KPNA2)	3838	karyopherin subunit alpha 2(KPNA2)
VP24	VP24_NT	KPNA6	B4DWX3	Importin subunit alpha-7	VP24|KPNA6	195	48.75	1	60.58	487.5	0	ENSG00000025800	karyopherin subunit alpha 6(KPNA6)
VP24	VP24_NT	LTV1	Q96GA3	LTV1 ribosome biogenesis factor(LTV1)	VP24|LTV1	31	7.75	1	8.59	77.5	0			84946	LTV1 ribosome biogenesis factor(LTV1)
VP24	VP24_NT	MAP7D3	Q8IWC1	MAP7 domain containing 3(MAP7D3)	VP24|MAP7D3	83	20.75	1	22.6	207.5	0	ENSG00000129680	MAP7 domain containing 3(MAP7D3)	79649	MAP7 domain containing 3(MAP7D3)
VP24	VP24_NT	MCM3AP	O60318	minichromosome maintenance complex component 3 associated protein(MCM3AP)	VP24|MCM3AP	253	63.25	1	82.08	632.5	0	ENSG00000160294	minichromosome maintenance complex component 3 associated protein(MCM3AP)	8888	minichromosome maintenance complex component 3 associated protein(MCM3AP)
VP24	VP24_CT	MTA2	A0A024R534	metastasis associated 1 family member 2(MTA2)	VP24|MTA2	59	14.75	0.94	2.57	9.08	0.01	ENSG00000149480	metastasis associated 1 family member 2(MTA2)	9219	metastasis associated 1 family member 2(MTA2)
VP24	VP24_CT	NIFK	Q9BYG3	nucleolar protein interacting with the FHA domain of MKI67(NIFK)	VP24|NIFK	134	33.5	1	8.16	53.6	0	ENSG00000155438	nucleolar protein interacting with the FHA domain of MKI67(NIFK)	84365	nucleolar protein interacting with the FHA domain of MKI67(NIFK)
VP24	VP24_NT	NUP214	A0A024R8B6	nucleoporin 214(NUP214)	VP24|NUP214	593	148.25	0.98	4.06	7.55	0			8021	nucleoporin 214(NUP214)
VP24	VP24_CT	NUP62	A0A024QZF1	nucleoporin 62(NUP62)	VP24|NUP62	60	15	0.98	3.06	9.23	0	ENSG00000213024	nucleoporin 62(NUP62)	23636	nucleoporin 62(NUP62)
VP24	VP24_NT	OSBPL8	A0A024RBB8	oxysterol binding protein like 8(OSBPL8)	VP24|OSBPL8	499	124.75	1	37.45	332.67	0	ENSG00000091039	oxysterol binding protein like 8(OSBPL8)	114882	oxysterol binding protein like 8(OSBPL8)
VP24	VP24_NT	PABPC1	A0A024R9C1	poly(A) binding protein cytoplasmic 1(PABPC1)	VP24|PABPC1	61	15.25	0.97	3.24	13.56	0			26986	poly(A) binding protein cytoplasmic 1(PABPC1)
VP24	VP24_CT	PIAS1	O75925	protein inhibitor of activated STAT 1(PIAS1)	VP24|PIAS1	46	11.5	1	13.16	115	0			8554	protein inhibitor of activated STAT 1(PIAS1)
VP24	VP24_CT	POLR3C	A0A024R4C1	RNA polymerase III subunit C(POLR3C)	VP24|POLR3C	95	23.75	1	32.75	237.5	0	ENSG00000186141	RNA polymerase III subunit C(POLR3C)	10623	RNA polymerase III subunit C(POLR3C)
VP24	VP24_NT	POM121	Q96HA1	POM121 transmembrane nucleoporin(POM121)	VP24|POM121	149	37.25	1	50.48	372.5	0	ENSG00000196313	POM121 transmembrane nucleoporin(POM121)	9883	POM121 transmembrane nucleoporin(POM121)
VP24	VP24_CT	POM121C	A0A075B7F8	POM121 transmembrane nucleoporin C(POM121C)	VP24|POM121C	190	47.5	1	64.64	475	0	ENSG00000272391	POM121 transmembrane nucleoporin C(POM121C)	100101267	POM121 transmembrane nucleoporin C(POM121C)
VP24	VP24_NT	PRDX3	Q53HC2	Peroxiredoxin 3 isoform a variant	VP24|PRDX3	33	8.25	0.98	2.72	9.43	0
VP24	VP24_CT	PRMT7	A0A024R6Z2	protein arginine methyltransferase 7(PRMT7)	VP24|PRMT7	54	13.5	1	17.81	135	0			54496	protein arginine methyltransferase 7(PRMT7)
VP24	VP24_CT	PTPN2	A8K3N4	protein tyrosine phosphatase, non-receptor type 2(PTPN2)	VP24|PTPN2	65	16.25	0.98	3.18	14.44	0	ENSG00000175354	protein tyrosine phosphatase, non-receptor type 2(PTPN2)	5771	protein tyrosine phosphatase, non-receptor type 2(PTPN2)
VP24	VP24_NT	RPL13	Q6NZ55	ribosomal protein L13(RPL13)	VP24|RPL13	24	6	1	6.91	60	0			6137	ribosomal protein L13(RPL13)
VP24	VP24_NT	RPL13A	M0QYS1	ribosomal protein L13a(RPL13A)	VP24|RPL13A	28	7	1	10.22	70	0			23521	ribosomal protein L13a(RPL13A)
VP24	VP24_NT	RPL15	A0A024R2Q4	ribosomal protein L15(RPL15)	VP24|RPL15	41	10.25	0.95	2.98	10.25	0.01			6138	ribosomal protein L15(RPL15)
VP24	VP24_NT	RPL19	J3KTE4	ribosomal protein L19(RPL19)	VP24|RPL19	20	5	1	5.16	50	0			6143	ribosomal protein L19(RPL19)
VP24	VP24_NT	RPL23	A0A024R1Q8	ribosomal protein L23(RPL23)	VP24|RPL23	26	6.5	0.98	3.14	17.33	0			9349	ribosomal protein L23(RPL23)
VP24	VP24_NT	RPL5	A2RUM7	ribosomal protein L5(RPL5)	VP24|RPL5	64	16	1	16.52	160	0			6125	ribosomal protein L5(RPL5)
VP24	VP24_NT	RPL7A	P62424	ribosomal protein L7a(RPL7A)	VP24|RPL7A	48	12	1	13.41	120	0			6130	ribosomal protein L7a(RPL7A)
VP24	VP24_NT	RPS11	P62280	ribosomal protein S11(RPS11)	VP24|RPS11	71	17.75	0.99	4.16	12.91	0			6205	ribosomal protein S11(RPS11)
VP24	VP24_NT	RPS15A	B2R4W8	ribosomal protein S15a(RPS15A)	VP24|RPS15A	47	11.75	0.91	1.19	7.83	0.01			6210	ribosomal protein S15a(RPS15A)
VP24	VP24_NT	RPS2	Q3KQT6	ribosomal protein S2(RPS2)	VP24|RPS2	19	4.75	1	6.91	47.5	0	ENSG00000140988	ribosomal protein S2(RPS2)	6187	ribosomal protein S2(RPS2)
VP24	VP24_NT	RPS25	P62851	ribosomal protein S25(RPS25)	VP24|RPS25	17	4.25	1	6.91	42.5	0	ENSG00000118181	ribosomal protein S25(RPS25)	6230	ribosomal protein S25(RPS25)
VP24	VP24_NT	RPS6	A2A3R6	ribosomal protein S6(RPS6)	VP24|RPS6	48	12	0.94	2.11	8	0.01			6194	ribosomal protein S6(RPS6)
VP24	VP24_NT	RPS8	Q5JR94	ribosomal protein S8(RPS8)	VP24|RPS8	52	13	0.99	3.84	17.33	0			6202	ribosomal protein S8(RPS8)
VP24	VP24_NT	SPDL1	Q96EA4	spindle apparatus coiled-coil protein 1(SPDL1)	VP24|SPDL1	35	8.75	1	11.83	87.5	0	ENSG00000040275	spindle apparatus coiled-coil protein 1(SPDL1)	54908	spindle apparatus coiled-coil protein 1(SPDL1)
VP24	VP24_NT	STRN	O43815	striatin(STRN)	VP24|STRN	65	16.25	0.96	2.88	9.29	0			6801	striatin(STRN)
VP24	VP24_CT	TAF1	P21675	TATA-box binding protein associated factor 1(TAF1)	VP24|TAF1	282	70.5	1	88.98	705	0	ENSG00000147133	TATA-box binding protein associated factor 1(TAF1)	6872	TATA-box binding protein associated factor 1(TAF1)
VP24	VP24_CT	TAF4	O00268	TATA-box binding protein associated factor 4(TAF4)	VP24|TAF4	41	10.25	1	11.58	102.5	0			6874	TATA-box binding protein associated factor 4(TAF4)
VP24	VP24_NT	TAF9	Q16594	TATA-box binding protein associated factor 9(TAF9)	VP24|TAF9	98	24.5	0.93	2.12	5.3	0.01	ENSG00000273841	TATA-box binding protein associated factor 9(TAF9)	6880	TATA-box binding protein associated factor 9(TAF9)
VP24	VP24_NT	TAF9B	Q9HBM6	TATA-box binding protein associated factor 9b(TAF9B)	VP24|TAF9B	79	19.75	1	27.08	197.5	0	ENSG00000187325	TATA-box binding protein associated factor 9b(TAF9B)	51616	TATA-box binding protein associated factor 9b(TAF9B)
VP24	VP24_CT	TCERG1	O14776	transcription elongation regulator 1(TCERG1)	VP24|TCERG1	276	69	0.94	2.22	4.84	0.01			10915	transcription elongation regulator 1(TCERG1)
VP24	VP24_NT	TCP1	P17987	t-complex 1(TCP1)	VP24|TCP1	60	15	1	14.97	150	0	ENSG00000120438	t-complex 1(TCP1)	6950	t-complex 1(TCP1)
VP24	VP24_NT	TJP1	G5E9E7	tight junction protein 1(TJP1)	VP24|TJP1	485	121.25	0.96	3.22	4.87	0			7082	tight junction protein 1(TJP1)
VP24	VP24_CT	TMEM263	Q8WUH6	transmembrane protein 263(TMEM263)	VP24|TMEM263	67	16.75	1	23.85	167.5	0			90488	transmembrane protein 263(TMEM263)
VP24	VP24_NT	TNRC6A	Q8NDV7	trinucleotide repeat containing 6A(TNRC6A)	VP24|TNRC6A	266	66.5	0.99	4.02	7	0	ENSG00000090905	trinucleotide repeat containing 6A(TNRC6A)	27327	trinucleotide repeat containing 6A(TNRC6A)
VP24	VP24_NT	TOP2A	P11388	topoisomerase (DNA) II alpha(TOP2A)	VP24|TOP2A	115	28.75	0.96	2.7	7.19	0.01			7153	topoisomerase (DNA) II alpha(TOP2A)
VP24	VP24_NT	TUFM	P49411	Tu translation elongation factor, mitochondrial(TUFM)	VP24|TUFM	59	14.75	0.91	1.26	5.62	0.01			7284	Tu translation elongation factor, mitochondrial(TUFM)
VP24	VP24_NT	USP9X	Q93008	ubiquitin specific peptidase 9, X-linked(USP9X)	VP24|USP9X	63	15.75	1	19.57	157.5	0	ENSG00000124486	ubiquitin specific peptidase 9, X-linked(USP9X)	8239	ubiquitin specific peptidase 9, X-linked(USP9X)
VP24	VP24_NT	VDAC2	A0A024QZT0	voltage dependent anion channel 2(VDAC2)	VP24|VDAC2	76	19	1	24.1	190	0			7417	voltage dependent anion channel 2(VDAC2)
VP24	VP24_NT	VDAC3	Q9Y277	voltage dependent anion channel 3(VDAC3)	VP24|VDAC3	18	4.5	1	5.16	45	0			7419	voltage dependent anion channel 3(VDAC3)
VP24	VP24_NT	WASF1	Q92558	WAS protein family member 1(WASF1)	VP24|WASF1	49	12.25	1	16.52	122.5	0	ENSG00000112290	WAS protein family member 1(WASF1)	8936	WAS protein family member 1(WASF1)
VP24	VP24_NT	WASF2	Q9Y6W5	WAS protein family member 2(WASF2)	VP24|WASF2	158	39.5	1	53.37	395	0	ENSG00000158195	WAS protein family member 2(WASF2)	10163	WAS protein family member 2(WASF2)
VP24	VP24_NT	WDCP	Q9H6R7	WD repeat and coiled coil containing(WDCP)	VP24|WDCP	165	41.25	0.99	4.94	8.05	0			80304	WD repeat and coiled coil containing(WDCP)
VP24	VP24_CT	WDR12	Q9GZL7	WD repeat domain 12(WDR12)	VP24|WDR12	113	28.25	1	38.61	282.5	0	ENSG00000138442	WD repeat domain 12(WDR12)	55759	WD repeat domain 12(WDR12)
VP24	VP24_CT	XRCC6	A0A024R1N4	X-ray repair cross complementing 6(XRCC6)	VP24|XRCC6	82	20.5	0.92	2	6.31	0.01			2547	X-ray repair cross complementing 6(XRCC6)
VP30	VP30_CT	ABI2	A0A0C4DG21	abl interactor 2(ABI2)	VP30|ABI2	30	7.5	1	9.65	75	0			10152	abl interactor 2(ABI2)
VP30	VP30_CT	AFDN	P55196	afadin, adherens junction formation factor(AFDN)	VP30|AFDN	211	52.75	1	70.06	527.5	0	ENSG00000130396	afadin, adherens junction formation factor(AFDN)	4301	afadin, adherens junction formation factor(AFDN)
VP30	VP30_NT	CGN	B9EK46	cingulin(CGN)	VP30|CGN	459	114.75	1	4.81	13.11	0			57530	cingulin(CGN)
VP30	VP30_NT	CGNL1	Q0VF96	cingulin like 1(CGNL1)	VP30|CGNL1	168	42	1	50.07	420	0	ENSG00000128849	cingulin like 1(CGNL1)	84952	cingulin like 1(CGNL1)
VP30	VP30_CT	FUBP3	A0A024R8A7	far upstream element binding protein 3(FUBP3)	VP30|FUBP3	90	22.5	0.97	2.63	12.86	0			8939	far upstream element binding protein 3(FUBP3)
VP30	VP30_CT	HNRNPU	B3KX72	cDNA FLJ44920 fis, clone BRAMY3011501, highly similar to Heterogeneous nuclear ribonucleoprotein U	VP30|HNRNPU	64	16	1	20.52	160	0
VP30	VP30_CT	IGF2BP2	B4DKT5	insulin like growth factor 2 mRNA binding protein 2(IGF2BP2)	VP30|IGF2BP2	41	10.25	1	12.84	102.5	0	ENSG00000073792	insulin like growth factor 2 mRNA binding protein 2(IGF2BP2)	10644	insulin like growth factor 2 mRNA binding protein 2(IGF2BP2)
VP30	VP30_NT	KIAA1462	Q9P266	KIAA1462(KIAA1462)	VP30|KIAA1462	129	32.25	1	25.18	322.5	0			57608	KIAA1462(KIAA1462)
VP30	VP30_CT	LARP4	Q71RC2	La ribonucleoprotein domain family member 4(LARP4)	VP30|LARP4	36	9	1	11.26	90	0	ENSG00000161813	La ribonucleoprotein domain family member 4(LARP4)	113251	La ribonucleoprotein domain family member 4(LARP4)
VP30	VP30_CT	LARP4B	Q92615	La ribonucleoprotein domain family member 4B(LARP4B)	VP30|LARP4B	56	14	0.99	3.61	28	0	ENSG00000107929	La ribonucleoprotein domain family member 4B(LARP4B)	23185	La ribonucleoprotein domain family member 4B(LARP4B)
VP30	VP30_CT	MAPT	A0A024R9Y0	microtubule associated protein tau(MAPT)	VP30|MAPT	32	8	1	9.65	80	0	ENSG00000186868	microtubule associated protein tau(MAPT)	4137	microtubule associated protein tau(MAPT)
VP30	VP30_NT	MPHOSPH9	A0A0A0MTP3	M-phase phosphoprotein 9(MPHOSPH9)	VP30|MPHOSPH9	54	13.5	1	14.56	135	0	ENSG00000051825	M-phase phosphoprotein 9(MPHOSPH9)	10198	M-phase phosphoprotein 9(MPHOSPH9)
VP30	VP30_CT	PABPC1	A0A024R9C1	poly(A) binding protein cytoplasmic 1(PABPC1)	VP30|PABPC1	209	52.25	1	7.2	46.44	0			26986	poly(A) binding protein cytoplasmic 1(PABPC1)
VP30	VP30_CT	PABPC4	B1ANR0	poly(A) binding protein cytoplasmic 4(PABPC4)	VP30|PABPC4	109	27.25	1	33.89	272.5	0			8761	poly(A) binding protein cytoplasmic 4(PABPC4)
VP30	VP30_CT	PDLIM5	A0A024RDE8	PDZ and LIM domain 5(PDLIM5)	VP30|PDLIM5	33	8.25	0.84	1.12	6.6	0.01	ENSG00000163110	PDZ and LIM domain 5(PDLIM5)	10611	PDZ and LIM domain 5(PDLIM5)
VP30	VP30_NT	RBBP6	Q7Z6E9	RB binding protein 6, ubiquitin ligase(RBBP6)	VP30|RBBP6	1008	252	1	10.48	27.62	0	ENSG00000122257	RB binding protein 6, ubiquitin ligase(RBBP6)	5930	RB binding protein 6, ubiquitin ligase(RBBP6)
VP30	VP30_CT	RBMS1	A0A0S2Z499	RNA binding motif single stranded interacting protein 1(RBMS1)	VP30|RBMS1	26	6.5	1	8.02	65	0			5937	RNA binding motif single stranded interacting protein 1(RBMS1)
VP30	VP30_NT	RPL24	C9JNW5	ribosomal protein L24(RPL24)	VP30|RPL24	35	8.75	0.89	1.71	7.78	0.01			6152	ribosomal protein L24(RPL24)
VP30	VP30_NT	SRPK2	A0A024R704	SRSF protein kinase 2(SRPK2)	VP30|SRPK2	58	14.5	1	19.17	145	0	ENSG00000135250	SRSF protein kinase 2(SRPK2)	6733	SRSF protein kinase 2(SRPK2)
VP30	VP30_NT	TCEB2	I3L0M9	transcription elongation factor B subunit 2(TCEB2)	VP30|TCEB2	11	2.75	0.97	2.52	22	0	ENSG00000103363	transcription elongation factor B subunit 2(TCEB2)	6923	transcription elongation factor B subunit 2(TCEB2)
VP30	VP30_NT	TJP1	G5E9E7	tight junction protein 1(TJP1)	VP30|TJP1	932	233	0.99	4.45	9.37	0			7082	tight junction protein 1(TJP1)
VP30	VP30_NT	TJP2	A0A024R233	tight junction protein 2(TJP2)	VP30|TJP2	317	79.25	0.97	3.32	7.64	0.01			9414	tight junction protein 2(TJP2)
VP30	VP30_NT	TMEM263	Q8WUH6	transmembrane protein 263(TMEM263)	VP30|TMEM263	61	15.25	1	19.17	152.5	0			90488	transmembrane protein 263(TMEM263)
VP30	VP30_NT	TNRC6B	Q9UPQ9	trinucleotide repeat containing 6B(TNRC6B)	VP30|TNRC6B	89	22.25	1	14.56	222.5	0			23112	trinucleotide repeat containing 6B(TNRC6B)
VP30	VP30_NT	VIM	B0YJC4	vimentin(VIM)	VP30|VIM	65	16.25	0.97	3.37	14.44	0			7431	vimentin(VIM)
VP30	VP30_NT	WIPF2	Q8TF74	WAS/WASL interacting protein family member 2(WIPF2)	VP30|WIPF2	132	33	1	38.44	330	0	ENSG00000171475	WAS/WASL interacting protein family member 2(WIPF2)	147179	WAS/WASL interacting protein family member 2(WIPF2)
VP30	VP30_NT	YEATS2	Q9ULM3	YEATS domain containing 2(YEATS2)	VP30|YEATS2	113	28.25	0.95	1.58	10.76	0.01	ENSG00000163872	YEATS domain containing 2(YEATS2)	55689	YEATS domain containing 2(YEATS2)
VP30	VP30_NT	YWHAE/FAM22A	G9K388	YWHAE/FAM22A fusion protein	VP30|YWHAE/FAM22A	569	142.25	0.99	3.83	12.51	0
VP35	VP35_NT	ABLIM1	B7Z4H1	actin binding LIM protein 1(ABLIM1)	VP35|ABLIM1	46	11.5	1	18.29	115	0			3983	actin binding LIM protein 1(ABLIM1)
VP35	VP35_NT	AGO2	A4FVC0	argonaute 2, RISC catalytic component(AGO2)	VP35|AGO2	64	16	1	18.29	160	0			27161	argonaute 2, RISC catalytic component(AGO2)
VP35	VP35_CT	AMOT	Q4VCS5	angiomotin(AMOT)	VP35|AMOT	84	21	1	14.62	210	0			154796	angiomotin(AMOT)
VP35	VP35_NT	ATXN2	H0YH87	ataxin 2(ATXN2)	VP35|ATXN2	92	23	0.97	2.56	8	0			6311	ataxin 2(ATXN2)
VP35	VP35_NT	B3KQ71	B3KQ71	cDNA FLJ32982 fis, clone THYMU1000002, highly similar to Golgi phosphoprotein 3	VP35|B3KQ71	23	5.75	0.87	1.6	5.75	0.01
VP35	VP35_NT	B3KSV4	B3KSV4	cDNA FLJ37129 fis, clone BRACE2022990	VP35|B3KSV4	65	16.25	1	24.34	162.5	0
VP35	VP35_NT	BCCIP	Q9P287	BRCA2 and CDKN1A interacting protein(BCCIP)	VP35|BCCIP	73	18.25	1	22.84	182.5	0	ENSG00000107949	BRCA2 and CDKN1A interacting protein(BCCIP)	56647	BRCA2 and CDKN1A interacting protein(BCCIP)
VP35	VP35_NT	BRCA2	P51587	BRCA2, DNA repair associated(BRCA2)	VP35|BRCA2	192	48	1	47.82	480	0			675	BRCA2, DNA repair associated(BRCA2)
VP35	VP35_NT	CCDC85C	A6NKD9	coiled-coil domain containing 85C(CCDC85C)	VP35|CCDC85C	31	7.75	0.79	0.62	4.13	0.01			317762	coiled-coil domain containing 85C(CCDC85C)
VP35	VP35_NT	CEP192	Q8TEP8	centrosomal protein 192(CEP192)	VP35|CEP192	404	101	0.99	4.23	7.92	0			55125	centrosomal protein 192(CEP192)
VP35	VP35_NT	CEP55	D3DR37	centrosomal protein 55(CEP55)	VP35|CEP55	59	14.75	0.98	3.29	11.8	0			55165	centrosomal protein 55(CEP55)
VP35	VP35_NT	CEP85	Q6P2H3	centrosomal protein 85(CEP85)	VP35|CEP85	53	13.25	1	21.33	132.5	0			64793	centrosomal protein 85(CEP85)
VP35	VP35_NT	CGN	B9EK46	cingulin(CGN)	VP35|CGN	325	81.25	0.99	4.1	9.29	0			57530	cingulin(CGN)
VP35	VP35_NT	CGNL1	Q0VF96	cingulin like 1(CGNL1)	VP35|CGNL1	89	22.25	1	33.23	222.5	0	ENSG00000128849	cingulin like 1(CGNL1)	84952	cingulin like 1(CGNL1)
VP35	VP35_NT	CNOT11	Q9UKZ1	CCR4-NOT transcription complex subunit 11(CNOT11)	VP35|CNOT11	79	19.75	1	28.8	197.5	0	ENSG00000158435	CCR4-NOT transcription complex subunit 11(CNOT11)	55571	CCR4-NOT transcription complex subunit 11(CNOT11)
VP35	VP35_NT	CYLD	A0A024R6T1	CYLD lysine 63 deubiquitinase(CYLD)	VP35|CYLD	222	55.5	1	73.74	555	0			1540	CYLD lysine 63 deubiquitinase(CYLD)
VP35	VP35_NT	DCP1B	Q8IZD4	decapping mRNA 1B(DCP1B)	VP35|DCP1B	259	64.75	1	35.04	259	0	ENSG00000151065	decapping mRNA 1B(DCP1B)	196513	decapping mRNA 1B(DCP1B)
VP35	VP35_NT	DCP2	Q8IU60	decapping mRNA 2(DCP2)	VP35|DCP2	117	29.25	1	43.46	292.5	0	ENSG00000172795	decapping mRNA 2(DCP2)	167227	decapping mRNA 2(DCP2)
VP35	VP35_NT	DDX6	P26196	DEAD-box helicase 6(DDX6)	VP35|DDX6	162	40.5	1	52.16	405	0	ENSG00000110367	DEAD-box helicase 6(DDX6)	1656	DEAD-box helicase 6(DDX6)
VP35	VP35_NT	DSP	P15924	desmoplakin(DSP)	VP35|DSP	373	93.25	0.98	3.35	6.07	0			1832	desmoplakin(DSP)
VP35	VP35_NT	DYNLL1	Q6FGH9	dynein light chain LC8-type 1(DYNLL1)	VP35|DYNLL1	137	34.25	1	42.01	342.5	0	ENSG00000088986	dynein light chain LC8-type 1(DYNLL1)	8655	dynein light chain LC8-type 1(DYNLL1)
VP35	VP35_NT	DYNLL2	Q96FJ2	dynein light chain LC8-type 2(DYNLL2)	VP35|DYNLL2	92	23	1	33.23	230	0	ENSG00000264364	dynein light chain LC8-type 2(DYNLL2)	140735	dynein light chain LC8-type 2(DYNLL2)
VP35	VP35_CT	EDC3	Q96F86	enhancer of mRNA decapping 3(EDC3)	VP35|EDC3	69	17.25	1	20.74	172.5	0	ENSG00000179151	enhancer of mRNA decapping 3(EDC3)	80153	enhancer of mRNA decapping 3(EDC3)
VP35	VP35_NT	EDC4	Q6P2E9	enhancer of mRNA decapping 4(EDC4)	VP35|EDC4	2273	568.25	1	7.86	11.28	0	ENSG00000038358	enhancer of mRNA decapping 4(EDC4)	23644	enhancer of mRNA decapping 4(EDC4)
VP35	VP35_NT	EIF4ENIF1	A0A024R1K0	eukaryotic translation initiation factor 4E nuclear import factor 1(EIF4ENIF1)	VP35|EIF4ENIF1	168	42	1	46.37	420	0	ENSG00000184708	eukaryotic translation initiation factor 4E nuclear import factor 1(EIF4ENIF1)	56478	eukaryotic translation initiation factor 4E nuclear import factor 1(EIF4ENIF1)
VP35	VP35_NT	EPS15L1	A0A024R7G6	epidermal growth factor receptor pathway substrate 15 like 1(EPS15L1)	VP35|EPS15L1	42	10.5	1	8.83	105	0			58513	epidermal growth factor receptor pathway substrate 15 like 1(EPS15L1)
VP35	VP35_NT	FAM193A	A0A1B0GVL4	family with sequence similarity 193 member A(FAM193A)	VP35|FAM193A	47	11.75	1	16.76	117.5	0	ENSG00000125386	family with sequence similarity 193 member A(FAM193A)	8603	family with sequence similarity 193 member A(FAM193A)
VP35	VP35_NT	FAM21C	A0A096LPC5	family with sequence similarity 21 member C(FAM21C)	VP35|FAM21C	477	119.25	1	147.74	1192.5	0			253725	family with sequence similarity 21 member C(FAM21C)
VP35	VP35_NT	FUBP3	A0A024R8A7	far upstream element binding protein 3(FUBP3)	VP35|FUBP3	78	19.5	0.97	2.57	11.14	0			8939	far upstream element binding protein 3(FUBP3)
VP35	VP35_NT	GAS8	O95995	growth arrest specific 8(GAS8)	VP35|GAS8	110	27.5	1	37.63	275	0	ENSG00000141013	growth arrest specific 8(GAS8)	2622	growth arrest specific 8(GAS8)
VP35	VP35_NT	GIGYF1	O75420	GRB10 interacting GYF protein 1(GIGYF1)	VP35|GIGYF1	48	12	1	15.21	120	0	ENSG00000146830	GRB10 interacting GYF protein 1(GIGYF1)	64599	GRB10 interacting GYF protein 1(GIGYF1)
VP35	VP35_NT	HRB	A0A024R458	HIV-1 Rev binding protein, isoform CRA_a	VP35|HRB	39	9.75	0.89	1.48	5.57	0.01
VP35	VP35_NT	IGF2BP1	Q9NZI8	insulin like growth factor 2 mRNA binding protein 1(IGF2BP1)	VP35|IGF2BP1	265	66.25	0.92	1.56	4.45	0.01			10642	insulin like growth factor 2 mRNA binding protein 1(IGF2BP1)
VP35	VP35_NT	IGF2BP2	F8W930	insulin like growth factor 2 mRNA binding protein 2(IGF2BP2)	VP35|IGF2BP2	172	43	1	6.51	21.5	0	ENSG00000073792	insulin like growth factor 2 mRNA binding protein 2(IGF2BP2)	10644	insulin like growth factor 2 mRNA binding protein 2(IGF2BP2)
VP35	VP35_NT	IGF2BP3	O00425	insulin like growth factor 2 mRNA binding protein 3(IGF2BP3)	VP35|IGF2BP3	68	17	1	19.81	170	0	ENSG00000136231	insulin like growth factor 2 mRNA binding protein 3(IGF2BP3)	10643	insulin like growth factor 2 mRNA binding protein 3(IGF2BP3)
VP35	VP35_NT	JCAD	Q9P266	junctional cadherin 5 associated	VP35|JCAD	177	44.25	1	60.82	442.5	0			57608	KIAA1462(KIAA1462)
VP35	VP35_NT	KIAA0430	Q9Y4F3	KIAA0430(KIAA0430)	VP35|KIAA0430	241	60.25	1	70.87	602.5	0			9665	KIAA0430(KIAA0430)
VP35	VP35_NT	KIAA1191	A0A024R7Q7	KIAA1191(KIAA1191)	VP35|KIAA1191	35	8.75	1	8.83	87.5	0			57179	KIAA1191(KIAA1191)
VP35	VP35_CT	KIAA1462	Q9P266	KIAA1462(KIAA1462)	VP35|KIAA1462	56	14	1	14.62	140	0			57608	KIAA1462(KIAA1462)
VP35	VP35_NT	KIAA1671	Q9BY89	KIAA1671(KIAA1671)	VP35|KIAA1671	541	135.25	1	5.39	8.8	0			85379	KIAA1671(KIAA1671)
VP35	VP35_NT	KIF14	Q15058	kinesin family member 14(KIF14)	VP35|KIF14	478	119.5	0.99	4.48	8.77	0			9928	kinesin family member 14(KIF14)
VP35	VP35_NT	LATS1	O95835	large tumor suppressor kinase 1(LATS1)	VP35|LATS1	82	20.5	1	28.8	205	0			9113	large tumor suppressor kinase 1(LATS1)
VP35	VP35_NT	LPP	A0A087WZF1	LIM domain containing preferred translocation partner in lipoma(LPP)	VP35|LPP	95	23.75	0.95	2.73	5.59	0.01			4026	LIM domain containing preferred translocation partner in lipoma(LPP)
VP35	VP35_NT	LSM14A	Q8ND56	LSM14A, mRNA processing body assembly factor(LSM14A)	VP35|LSM14A	95	23.75	1	33.23	237.5	0	ENSG00000257103	LSM14A, mRNA processing body assembly factor(LSM14A)	26065	LSM14A, mRNA processing body assembly factor(LSM14A)
VP35	VP35_NT	LSM14B	Q9BX40	LSM family member 14B(LSM14B)	VP35|LSM14B	69	17.25	1	4.96	23	0	ENSG00000149657	LSM family member 14B(LSM14B)	149986	LSM family member 14B(LSM14B)
VP35	VP35_CT	LTV1	Q96GA3	LTV1 ribosome biogenesis factor(LTV1)	VP35|LTV1	89	22.25	1	23.74	222.5	0			84946	LTV1 ribosome biogenesis factor(LTV1)
VP35	VP35_NT	MEIOC	A2RUB1	meiosis specific with coiled-coil domain(MEIOC)	VP35|MEIOC	96	24	1	30.28	240	0	ENSG00000180336	meiosis specific with coiled-coil domain(MEIOC)	284071	meiosis specific with coiled-coil domain(MEIOC)
VP35	VP35_NT	MPHOSPH9	Q99550	M-phase phosphoprotein 9(MPHOSPH9)	VP35|MPHOSPH9	347	86.75	1	119.36	867.5	0	ENSG00000051825	M-phase phosphoprotein 9(MPHOSPH9)	10198	M-phase phosphoprotein 9(MPHOSPH9)
VP35	VP35_NT	NFX1	Q12986	nuclear transcription factor, X-box binding 1(NFX1)	VP35|NFX1	53	13.25	1	12.07	132.5	0			4799	nuclear transcription factor, X-box binding 1(NFX1)
VP35	VP35_NT	PATL1	Q86TB9	PAT1 homolog 1, processing body mRNA decay factor(PATL1)	VP35|PATL1	257	64.25	1	90.89	642.5	0	ENSG00000166889	PAT1 homolog 1, processing body mRNA decay factor(PATL1)	219988	PAT1 homolog 1, processing body mRNA decay factor(PATL1)
VP35	VP35_NT	PDLIM5	A0A024RDE8	PDZ and LIM domain 5(PDLIM5)	VP35|PDLIM5	90	22.5	0.99	4.26	18	0	ENSG00000163110	PDZ and LIM domain 5(PDLIM5)	10611	PDZ and LIM domain 5(PDLIM5)
VP35	VP35_NT	PDLIM7	Q9NR12	PDZ and LIM domain 7(PDLIM7)	VP35|PDLIM7	23	5.75	1	8.83	57.5	0	ENSG00000196923	PDZ and LIM domain 7(PDLIM7)	9260	PDZ and LIM domain 7(PDLIM7)
VP35	VP35_NT	PRDX3	Q53HC2	Peroxiredoxin 3 isoform a variant	VP35|PRDX3	23	5.75	0.91	1.38	6.57	0.01
VP35	VP35_NT	PRMT7	A0A024R6Z2	protein arginine methyltransferase 7(PRMT7)	VP35|PRMT7	19	4.75	1	5.4	47.5	0			54496	protein arginine methyltransferase 7(PRMT7)
VP35	VP35_NT	PRRC2A	P48634	proline rich coiled-coil 2A(PRRC2A)	VP35|PRRC2A	301	75.25	0.97	3.37	5.73	0			7916	proline rich coiled-coil 2A(PRRC2A)
VP35	VP35_NT	PRRC2B	Q5JSZ5	proline rich coiled-coil 2B(PRRC2B)	VP35|PRRC2B	134	33.5	0.98	3.93	9.93	0			84726	proline rich coiled-coil 2B(PRRC2B)
VP35	VP35_NT	RC3H1	Q5TC82	ring finger and CCCH-type domains 1(RC3H1)	VP35|RC3H1	85	21.25	1	27.32	212.5	0	ENSG00000135870	ring finger and CCCH-type domains 1(RC3H1)	149041	ring finger and CCCH-type domains 1(RC3H1)
VP35	VP35_NT	RC3H2	A0A024R899	ring finger and CCCH-type domains 2(RC3H2)	VP35|RC3H2	74	18.5	1	22.84	185	0	ENSG00000056586	ring finger and CCCH-type domains 2(RC3H2)	54542	ring finger and CCCH-type domains 2(RC3H2)
VP35	VP35_NT	RNF214	A0A024R3D4	ring finger protein 214(RNF214)	VP35|RNF214	36	9	1	8.83	90	0	ENSG00000167257	ring finger protein 214(RNF214)	257160	ring finger protein 214(RNF214)
VP35	VP35_NT	RPS15A	B2R4W8	ribosomal protein S15a(RPS15A)	VP35|RPS15A	41	10.25	0.93	2.34	6.83	0.01			6210	ribosomal protein S15a(RPS15A)
VP35	VP35_NT	SEC24A	B4E205	SEC24 homolog A, COPII coat complex component(SEC24A)	VP35|SEC24A	33	8.25	0.89	1.76	5.5	0.01			10802	SEC24 homolog A, COPII coat complex component(SEC24A)
VP35	VP35_NT	SIPA1L3	B2RWP0	signal induced proliferation associated 1 like 3(SIPA1L3)	VP35|SIPA1L3	134	33.5	1	40.55	335	0			23094	signal induced proliferation associated 1 like 3(SIPA1L3)
VP35	VP35_NT	SMAP1	B2RDK5	cDNA, FLJ96655, highly similar to Homo sapiens stromal membrane-associated protein 1 (SMAP1), mRNA	VP35|SMAP1	25	6.25	0.87	1.46	5.56	0.01
VP35	VP35_NT	SMG7	Q92540	SMG7, nonsense mediated mRNA decay factor(SMG7)	VP35|SMG7	204	51	1	6.26	29.14	0	ENSG00000116698	SMG7, nonsense mediated mRNA decay factor(SMG7)	9887	SMG7, nonsense mediated mRNA decay factor(SMG7)
VP35	VP35_NT	SPATA2	B3KN08	Spermatogenesis-associated protein 2	VP35|SPATA2	29	7.25	1	8.83	72.5	0	ENSG00000158480	spermatogenesis associated 2(SPATA2)
VP35	VP35_NT	STAU1	A8K622	cDNA FLJ75871, highly similar to Homo sapiens staufen, RNA binding protein (STAU), transcript variant T3, mRNA	VP35|STAU1	276	69	0.98	3.89	8.24	0
VP35	VP35_NT	TAB2	Q9NYJ8	TGF-beta activated kinase 1/MAP3K7 binding protein 2(TAB2)	VP35|TAB2	108	27	0.99	4.58	16.62	0			23118	TGF-beta activated kinase 1/MAP3K7 binding protein 2(TAB2)
VP35	VP35_CT	TAGLN2	X6RJP6	transgelin 2(TAGLN2)	VP35|TAGLN2	75	18.75	0.94	2.32	9.38	0.01			8407	transgelin 2(TAGLN2)
VP35	VP35_NT	TJP1	G5E9E7	tight junction protein 1(TJP1)	VP35|TJP1	1234	308.5	1	6.42	12.4	0			7082	tight junction protein 1(TJP1)
VP35	VP35_CT	TJP2	A0A024R233	tight junction protein 2(TJP2)	VP35|TJP2	234	58.5	0.94	2.47	5.64	0.01			9414	tight junction protein 2(TJP2)
VP35	VP35_NT	TNRC6A	Q8NDV7	trinucleotide repeat containing 6A(TNRC6A)	VP35|TNRC6A	630	157.5	1	200.1	1575	0	ENSG00000090905	trinucleotide repeat containing 6A(TNRC6A)	27327	trinucleotide repeat containing 6A(TNRC6A)
VP35	VP35_NT	TNRC6C	A0A1B0GU24	trinucleotide repeat containing 6C(TNRC6C)	VP35|TNRC6C	248	62	1	79.46	620	0			57690	trinucleotide repeat containing 6C(TNRC6C)
VP35	VP35_NT	TTK	P33981	TTK protein kinase(TTK)	VP35|TTK	83	20.75	1	5.11	23.71	0			7272	TTK protein kinase(TTK)
VP35	VP35_NT	TUFM	P49411	Tu translation elongation factor, mitochondrial(TUFM)	VP35|TUFM	63	15.75	0.95	1.96	6	0			7284	Tu translation elongation factor, mitochondrial(TUFM)
VP35	VP35_NT	TXLNG	Q9NUQ3	taxilin gamma(TXLNG)	VP35|TXLNG	46	11.5	1	8.83	115	0			55787	taxilin gamma(TXLNG)
VP35	VP35_NT	UBAP2	Q5T6F2	ubiquitin associated protein 2(UBAP2)	VP35|UBAP2	144	36	1	7.45	41.14	0			55833	ubiquitin associated protein 2(UBAP2)
VP35	VP35_NT	UPF1	A0A024R7L5	UPF1, RNA helicase and ATPase(UPF1)	VP35|UPF1	99	24.75	0.99	4.39	24.75	0			5976	UPF1, RNA helicase and ATPase(UPF1)
VP35	VP35_NT	USP54	Q70EL1	ubiquitin specific peptidase 54(USP54)	VP35|USP54	72	18	1	24.34	180	0			159195	ubiquitin specific peptidase 54(USP54)
VP35	VP35_NT	XRN1	Q8IZH2	5'-3' exoribonuclease 1(XRN1)	VP35|XRN1	877	219.25	1	7.93	38.13	0	ENSG00000114127	5'-3' exoribonuclease 1(XRN1)	54464	5'-3' exoribonuclease 1(XRN1)
VP35	VP35_NT	YTHDC2	Q9H6S0	YTH domain containing 2(YTHDC2)	VP35|YTHDC2	168	42	1	4.79	21	0			64848	YTH domain containing 2(YTHDC2)
VP35	VP35_NT	YTHDF1	B4DT65	YTH N6-methyladenosine RNA binding protein 1	VP35|YTHDF1	53	13.25	1	16.76	132.5	0	ENSG00000149658	YTH N6-methyladenosine RNA binding protein 1(YTHDF1)
VP35	VP35_NT	YTHDF2	B5BU99	YTH N6-methyladenosine RNA binding protein 2(YTHDF2)	VP35|YTHDF2	80	20	0.98	3.18	9.41	0			51441	YTH N6-methyladenosine RNA binding protein 2(YTHDF2)
VP35	VP35_NT	YTHDF3	A0A024R7W5	YTH N6-methyladenosine RNA binding protein 3(YTHDF3)	VP35|YTHDF3	80	20	0.96	3.04	7.62	0			253943	YTH N6-methyladenosine RNA binding protein 3(YTHDF3)
VP35	VP35_NT	ZC3HAV1	Q7Z2W4	zinc finger CCCH-type containing, antiviral 1(ZC3HAV1)	VP35|ZC3HAV1	627	156.75	0.99	4.27	5.6	0			56829	zinc finger CCCH-type containing, antiviral 1(ZC3HAV1)
VP35	VP35_NT	ZMYM1	Q5SVZ6	zinc finger MYM-type containing 1(ZMYM1)	VP35|ZMYM1	193	48.25	1	62.26	482.5	0	ENSG00000197056	zinc finger MYM-type containing 1(ZMYM1)	79830	zinc finger MYM-type containing 1(ZMYM1)
VP35	VP35_NT	ZNF598	Q86UK7	zinc finger protein 598(ZNF598)	VP35|ZNF598	59	14.75	0.97	2.22	10.73	0			90850	zinc finger protein 598(ZNF598)
VP40	VP40_NT	AARSD1	Q9BTE6	alanyl-tRNA synthetase domain containing 1(AARSD1)	VP40|AARSD1	84	21	1	29.95	210	0			80755	alanyl-tRNA synthetase domain containing 1(AARSD1)
VP40	VP40_NT	AFDN	J3KN01	afadin, adherens junction formation factor(AFDN)	VP40|AFDN	397	99.25	0.95	2.84	4.87	0.01	ENSG00000130396	afadin, adherens junction formation factor(AFDN)	4301	afadin, adherens junction formation factor(AFDN)
VP40	VP40_NT	BCCIP	Q9P287	BRCA2 and CDKN1A interacting protein(BCCIP)	VP40|BCCIP	104	26	1	32.9	260	0	ENSG00000107949	BRCA2 and CDKN1A interacting protein(BCCIP)	56647	BRCA2 and CDKN1A interacting protein(BCCIP)
VP40	VP40_NT	CCT3	B3KX11	chaperonin containing TCP1 subunit 3(CCT3)	VP40|CCT3	43	10.75	1	13.32	107.5	0			7203	chaperonin containing TCP1 subunit 3(CCT3)
VP40	VP40_NT	DSG2	Q14126	desmoglein 2(DSG2)	VP40|DSG2	263	65.75	1	5.68	9.39	0	ENSG00000046604	desmoglein 2(DSG2)	1829	desmoglein 2(DSG2)
VP40	VP40_CT	EIF5A	I3L397	eukaryotic translation initiation factor 5A(EIF5A)	VP40|EIF5A	48	12	1	9.37	120	0			1984	eukaryotic translation initiation factor 5A(EIF5A)
VP40	VP40_NT	EPB41	P11171	erythrocyte membrane protein band 4.1(EPB41)	VP40|EPB41	101	25.25	0.98	3.17	15.54	0	ENSG00000159023	erythrocyte membrane protein band 4.1(EPB41)	2035	erythrocyte membrane protein band 4.1(EPB41)
VP40	VP40_NT	FAM171A2	A8MVW0	family with sequence similarity 171 member A2(FAM171A2)	VP40|FAM171A2	43	10.75	1	14.88	107.5	0			284069	family with sequence similarity 171 member A2(FAM171A2)
VP40	VP40_NT	FAM21C	A0A096LPC5	family with sequence similarity 21 member C(FAM21C)	VP40|FAM21C	341	85.25	1	119.03	852.5	0			253725	family with sequence similarity 21 member C(FAM21C)
VP40	VP40_NT	FASN	P49327	fatty acid synthase(FASN)	VP40|FASN	797	199.25	0.99	4.67	11.81	0			2194	fatty acid synthase(FASN)
VP40	VP40_CT	GPSM1	A0A0A0MRC4	G-protein signaling modulator 1(GPSM1)	VP40|GPSM1	91	22.75	0.75	-2.07	227.5	0.01	ENSG00000160360	G-protein signaling modulator 1(GPSM1)	26086	G-protein signaling modulator 1(GPSM1)
VP40	VP40_NT	HN1	J3KT51	hematological and neurological expressed 1(HN1)	VP40|HN1	32	8	1	8.5	80	0			51155	hematological and neurological expressed 1(HN1)
VP40	VP40_NT	IPO7	O95373	importin 7(IPO7)	VP40|IPO7	49	12.25	0.96	2.75	10.89	0			10527	importin 7(IPO7)
VP40	VP40_NT	JUP	A0A024R1X8	junction plakoglobin(JUP)	VP40|JUP	102	25.5	0.99	3.66	13.6	0			3728	junction plakoglobin(JUP)
VP40	VP40_NT	LNPEP	B2RAK1	cDNA, FLJ94965, highly similar to Homo sapiens leucyl/cystinyl aminopeptidase (LNPEP), mRNA	VP40|LNPEP	58	14.5	1	19.48	145	0	ENSG00000113441	leucyl and cystinyl aminopeptidase(LNPEP)
VP40	VP40_NT	LRIF1	Q5T3J3	ligand dependent nuclear receptor interacting factor 1(LRIF1)	VP40|LRIF1	30	7.5	0.92	1.49	10	0.01			55791	ligand dependent nuclear receptor interacting factor 1(LRIF1)
VP40	VP40_NT	MON2	B7ZM73	MON2 homolog, regulator of endosome-to-Golgi trafficking(MON2)	VP40|MON2	44	11	1	14.88	110	0	ENSG00000061987	MON2 homolog, regulator of endosome-to-Golgi trafficking(MON2)	23041	MON2 homolog, regulator of endosome-to-Golgi trafficking(MON2)
VP40	VP40_NT	NECTIN2	Q92692	nectin cell adhesion molecule 2(NECTIN2)	VP40|NECTIN2	100	25	1	5.12	28.57	0	ENSG00000130202	nectin cell adhesion molecule 2(NECTIN2)	5819	nectin cell adhesion molecule 2(NECTIN2)
VP40	VP40_NT	NOTCH2	Q04721	notch 2(NOTCH2)	VP40|NOTCH2	317	79.25	1	71.97	792.5	0	ENSG00000134250	notch 2(NOTCH2)	4853	notch 2(NOTCH2)
VP40	VP40_NT	PDCD11	Q14690	programmed cell death 11(PDCD11)	VP40|PDCD11	57	14.25	1	21	142.5	0	ENSG00000148843	programmed cell death 11(PDCD11)	22984	programmed cell death 11(PDCD11)
VP40	VP40_NT	PDLIM5	A0A024RDE8	PDZ and LIM domain 5(PDLIM5)	VP40|PDLIM5	48	12	0.94	2.36	9.6	0.01	ENSG00000163110	PDZ and LIM domain 5(PDLIM5)	10611	PDZ and LIM domain 5(PDLIM5)
VP40	VP40_CT	PIAS1	O75925	protein inhibitor of activated STAT 1(PIAS1)	VP40|PIAS1	48	12	1	7.73	120	0			8554	protein inhibitor of activated STAT 1(PIAS1)
VP40	VP40_NT	PPM1B	O75688	protein phosphatase, Mg2+/Mn2+ dependent 1B(PPM1B)	VP40|PPM1B	104	26	1	37.3	260	0	ENSG00000138032	protein phosphatase, Mg2+/Mn2+ dependent 1B(PPM1B)	5495	protein phosphatase, Mg2+/Mn2+ dependent 1B(PPM1B)
VP40	VP40_NT	PRMT7	A0A024R6Z2	protein arginine methyltransferase 7(PRMT7)	VP40|PRMT7	35	8.75	1	8.5	87.5	0			54496	protein arginine methyltransferase 7(PRMT7)
VP40	VP40_NT	PTPN14	A8K6H6	protein tyrosine phosphatase, non-receptor type 14(PTPN14)	VP40|PTPN14	45	11.25	1	16.43	112.5	0	ENSG00000152104	protein tyrosine phosphatase, non-receptor type 14(PTPN14)	5784	protein tyrosine phosphatase, non-receptor type 14(PTPN14)
VP40	VP40_NT	RASAL2	Q9UJF2	RAS protein activator like 2(RASAL2)	VP40|RASAL2	67	16.75	1	17.96	167.5	0	ENSG00000075391	RAS protein activator like 2(RASAL2)	9462	RAS protein activator like 2(RASAL2)
VP40	VP40_NT	RPL7A	P62424	ribosomal protein L7a(RPL7A)	VP40|RPL7A	78	19.5	1	28.47	195	0			6130	ribosomal protein L7a(RPL7A)
VP40	VP40_NT	RPS11	P62280	ribosomal protein S11(RPS11)	VP40|RPS11	44	11	0.92	1.57	8	0.01			6205	ribosomal protein S11(RPS11)
VP40	VP40_NT	RPS15A	B2R4W8	ribosomal protein S15a(RPS15A)	VP40|RPS15A	44	11	0.92	2.01	7.33	0.01			6210	ribosomal protein S15a(RPS15A)
VP40	VP40_NT	SEC16A	F1T0I1	SEC16 homolog A, endoplasmic reticulum export factor(SEC16A)	VP40|SEC16A	302	75.5	0.99	4.06	13.73	0			9919	SEC16 homolog A, endoplasmic reticulum export factor(SEC16A)
VP40	VP40_NT	SET	A0A024R895	SET nuclear proto-oncogene(SET)	VP40|SET	29	7.25	0.96	2.49	14.5	0	ENSG00000119335	SET nuclear proto-oncogene(SET)	6418	SET nuclear proto-oncogene(SET)
VP40	VP40_NT	SLC38A2	A0A024R0W3	solute carrier family 38 member 2(SLC38A2)	VP40|SLC38A2	15	3.75	1	5.07	37.5	0	ENSG00000134294	solute carrier family 38 member 2(SLC38A2)	54407	solute carrier family 38 member 2(SLC38A2)
VP40	VP40_CT	SMCR8	Q8TEV9	Smith-Magenis syndrome chromosome region, candidate 8(SMCR8)	VP40|SMCR8	69	17.25	1	23.24	172.5	0	ENSG00000176994	Smith-Magenis syndrome chromosome region, candidate 8(SMCR8)	140775	Smith-Magenis syndrome chromosome region, candidate 8(SMCR8)
VP40	VP40_NT	SORT1	Q99523	sortilin 1(SORT1)	VP40|SORT1	31	7.75	1	10.13	77.5	0	ENSG00000134243	sortilin 1(SORT1)	6272	sortilin 1(SORT1)
VP40	VP40_NT	TBC1D15	Q8TC07	TBC1 domain family member 15(TBC1D15)	VP40|TBC1D15	55	13.75	0.97	3.15	12.22	0	ENSG00000121749	TBC1 domain family member 15(TBC1D15)	64786	TBC1 domain family member 15(TBC1D15)
VP40	VP40_NT	TJP1	G5E9E7	tight junction protein 1(TJP1)	VP40|TJP1	637	159.25	0.98	3.77	6.4	0			7082	tight junction protein 1(TJP1)
VP40	VP40_NT	TJP2	A0A024R233	tight junction protein 2(TJP2)	VP40|TJP2	225	56.25	0.93	1.78	5.42	0.01			9414	tight junction protein 2(TJP2)
VP40	VP40_NT	TNRC6B	Q9UPQ9	trinucleotide repeat containing 6B(TNRC6B)	VP40|TNRC6B	146	36.5	1	47.49	365	0			23112	trinucleotide repeat containing 6B(TNRC6B)
VP40	VP40_NT	UBAP1	A0A0D9SG79	ubiquitin associated protein 1(UBAP1)	VP40|UBAP1	16	4	1	5.07	40	0	ENSG00000165006	ubiquitin associated protein 1(UBAP1)	51271	ubiquitin associated protein 1(UBAP1)
VP40	VP40_NT	USP6NL	X6RAB3	USP6 N-terminal like(USP6NL)	VP40|USP6NL	101	25.25	1	35.84	252.5	0	ENSG00000148429	USP6 N-terminal like(USP6NL)	9712	USP6 N-terminal like(USP6NL)

## Sheet: BioID by Viral construct vs GFP
Bait	Bait Construct	Prey	UniProtID	Gene Name	Protein Interaction ID	Construct Interaction ID	SpecSum	AvgSpec	Saint Score	log Odds Score	Fold Change	BFDR	Ensembl Gene ID	Ensembl Gene description	NCBI Entrez Gene ID	NCBI Entrez Gene descriptiion
NP	NP_CT	ABL2	P42684	ABL proto-oncogene 2, non-receptor tyrosine kinase(ABL2)	NP|ABL2	NP_CT|ABL2	100	25	1	36.33	250	0	ENSG00000143322	ABL proto-oncogene 2, non-receptor tyrosine kinase(ABL2)	27	ABL proto-oncogene 2, non-receptor tyrosine kinase(ABL2)
NP	NP_CT	AHNAK2	Q8IVF2	AHNAK nucleoprotein 2(AHNAK2)	NP|AHNAK2	NP_CT|AHNAK2	530	132.5	1	174.82	1325	0	ENSG00000185567	AHNAK nucleoprotein 2(AHNAK2)	113146	AHNAK nucleoprotein 2(AHNAK2)
NP	NP_CT	ARHGAP29	Q52LW3	Rho GTPase activating protein 29(ARHGAP29)	NP|ARHGAP29	NP_CT|ARHGAP29	94	23.5	1	30.45	235	0	ENSG00000137962	Rho GTPase activating protein 29(ARHGAP29)	9411	Rho GTPase activating protein 29(ARHGAP29)
NP	NP_CT	ARHGEF16	B3KTS4	Rho guanine nucleotide exchange factor 16(ARHGEF16)	NP|ARHGEF16	NP_CT|ARHGEF16	65	16.25	1	21.5	162.5	0	ENSG00000130762	Rho guanine nucleotide exchange factor 16(ARHGEF16)	27237	Rho guanine nucleotide exchange factor 16(ARHGEF16)
NP	NP_CT	C16ORF70	A0A024R6W4	chromosome 16 open reading frame 70(C16orf70)	NP|C16ORF70	NP_CT|C16ORF70	15	3.75	1	5.57	37.5	0	ENSG00000125149	chromosome 16 open reading frame 70(C16orf70)	80262	chromosome 16 open reading frame 70(C16orf70)
NP	NP_CT	C1ORF198	A0A024R3S1	chromosome 1 open reading frame 198(C1orf198)	NP|C1ORF198	NP_CT|C1ORF198	29	7.25	1	10.63	72.5	0	ENSG00000119280	chromosome 1 open reading frame 198(C1orf198)	84886	chromosome 1 open reading frame 198(C1orf198)
NP	NP_CT	C6ORF132	Q5T0Z8	chromosome 6 open reading frame 132(C6orf132)	NP|C6ORF132	NP_CT|C6ORF132	64	16	1	21.5	160	0	ENSG00000188112	chromosome 6 open reading frame 132(C6orf132)	647024	chromosome 6 open reading frame 132(C6orf132)
NP	NP_CT	CAMSAP2	Q08AD1	calmodulin regulated spectrin associated protein family member 2(CAMSAP2)	NP|CAMSAP2	NP_CT|CAMSAP2	161	40.25	1	56.66	402.5	0	ENSG00000118200	calmodulin regulated spectrin associated protein family member 2(CAMSAP2)	23271	calmodulin regulated spectrin associated protein family member 2(CAMSAP2)
NP	NP_CT	CAMSAP3	Q9P1Y5	calmodulin regulated spectrin associated protein family member 3(CAMSAP3)	NP|CAMSAP3	NP_CT|CAMSAP3	322	80.5	0.96	2.38	4.88	0	ENSG00000076826	calmodulin regulated spectrin associated protein family member 3(CAMSAP3)	57662	calmodulin regulated spectrin associated protein family member 3(CAMSAP3)
NP	NP_CT	CASC5	Q05C46	CASC5 protein	NP|CASC5	NP_CT|CASC5	97	24.25	0.96	3	5.88	0
NP	NP_CT	CEP85L	Q5SZL2	centrosomal protein 85 like(CEP85L)	NP|CEP85L	NP_CT|CEP85L	87	21.75	1	27.49	217.5	0	ENSG00000111860	centrosomal protein 85 like(CEP85L)	387119	centrosomal protein 85 like(CEP85L)
NP	NP_CT	CGNL1	Q0VF96	cingulin like 1(CGNL1)	NP|CGNL1	NP_CT|CGNL1	496	124	1	170.57	1240	0	ENSG00000128849	cingulin like 1(CGNL1)	84952	cingulin like 1(CGNL1)
NP	NP_CT	CP110	A0A024QYV8	CP110 protein, isoform CRA_a	NP|CP110	NP_CT|CP110	198	49.5	1	5.14	9.66	0
NP	NP_CT	CSPP1	Q1MSJ5	centrosome and spindle pole associated protein 1(CSPP1)	NP|CSPP1	NP_CT|CSPP1	157	39.25	1	56.66	392.5	0	ENSG00000104218	centrosome and spindle pole associated protein 1(CSPP1)	79848	centrosome and spindle pole associated protein 1(CSPP1)
NP	NP_CT	DIP2B	Q9P265	disco interacting protein 2 homolog B(DIP2B)	NP|DIP2B	NP_CT|DIP2B	57	14.25	1	16.93	142.5	0	ENSG00000066084	disco interacting protein 2 homolog B(DIP2B)	57609	disco interacting protein 2 homolog B(DIP2B)
NP	NP_CT	DZIP3	Q86Y13	DAZ interacting zinc finger protein 3(DZIP3)	NP|DZIP3	NP_CT|DZIP3	72	18	1	21.5	180	0	ENSG00000198919	DAZ interacting zinc finger protein 3(DZIP3)	9666	DAZ interacting zinc finger protein 3(DZIP3)
NP	NP_CT	EGLN1	R4RZ18	egl-9 family hypoxia inducible factor 1(EGLN1)	NP|EGLN1	NP_CT|EGLN1	336	84	0.99	4.66	8.1	0	ENSG00000135766	egl-9 family hypoxia inducible factor 1(EGLN1)	54583	egl-9 family hypoxia inducible factor 1(EGLN1)
NP	NP_CT	FAM188B	Q4G0A6	family with sequence similarity 188 member B(FAM188B)	NP|FAM188B	NP_CT|FAM188B	40	10	1	15.38	100	0	ENSG00000106125	family with sequence similarity 188 member B(FAM188B)	84182	family with sequence similarity 188 member B(FAM188B)
NP	NP_CT	FAM83G	A6ND36	family with sequence similarity 83 member G(FAM83G)	NP|FAM83G	NP_CT|FAM83G	42	10.5	1	15.38	105	0	ENSG00000188522	family with sequence similarity 83 member G(FAM83G)	644815	family with sequence similarity 83 member G(FAM83G)
NP	NP_CT	GEN1	Q17RS7	GEN1, Holliday junction 5' flap endonuclease(GEN1)	NP|GEN1	NP_CT|GEN1	95	23.75	1	34.87	237.5	0	ENSG00000178295	GEN1, Holliday junction 5' flap endonuclease(GEN1)	348654	GEN1, Holliday junction 5' flap endonuclease(GEN1)
NP	NP_CT	GIT1	Q9Y2X7	GIT ArfGAP 1(GIT1)	NP|GIT1	NP_CT|GIT1	174	43.5	1	50.88	435	0	ENSG00000108262	GIT ArfGAP 1(GIT1)	28964	GIT ArfGAP 1(GIT1)
NP	NP_CT	HAUS8	Q9BT25	HAUS augmin like complex subunit 8(HAUS8)	NP|HAUS8	NP_CT|HAUS8	35	8.75	1	12.24	87.5	0	ENSG00000131351	HAUS augmin like complex subunit 8(HAUS8)	93323	HAUS augmin like complex subunit 8(HAUS8)
NP	NP_CT	IFT74	A0PJM7	intraflagellar transport 74(IFT74)	NP|IFT74	NP_CT|IFT74	338	84.5	0.99	4.2	7.51	0	ENSG00000096872	intraflagellar transport 74(IFT74)	80173	intraflagellar transport 74(IFT74)
NP	NP_CT	INPPL1	O15357	inositol polyphosphate phosphatase like 1(INPPL1)	NP|INPPL1	NP_CT|INPPL1	58	14.5	1	21.5	145	0	ENSG00000165458	inositol polyphosphate phosphatase like 1(INPPL1)	3636	inositol polyphosphate phosphatase like 1(INPPL1)
NP	NP_CT	KATNB1	Q9BVA0	katanin regulatory subunit B1(KATNB1)	NP|KATNB1	NP_CT|KATNB1	20	5	0.99	3.8	20	0	ENSG00000140854	katanin regulatory subunit B1(KATNB1)	10300	katanin regulatory subunit B1(KATNB1)
NP	NP_CT	KIAA0368	J3KN16	KIAA0368(KIAA0368)	NP|KIAA0368	NP_CT|KIAA0368	145	36.25	0.98	3.55	8.53	0	ENSG00000136813	KIAA0368(KIAA0368)	23392	KIAA0368(KIAA0368)
NP	NP_CT	KIAA1217	Q5T5P2	KIAA1217(KIAA1217)	NP|KIAA1217	NP_CT|KIAA1217	206	51.5	1	63.86	515	0	ENSG00000120549	KIAA1217(KIAA1217)	56243	KIAA1217(KIAA1217)
NP	NP_CT	LMO7	B7Z8W3	cDNA FLJ53272, highly similar to Homo sapiens LIM domain 7 (LMO7), mRNA	NP|LMO7	NP_CT|LMO7	56	14	1	18.46	140	0	ENSG00000136153	LIM domain 7(LMO7)
NP	NP_CT	MAP7D3	Q8IWC1	MAP7 domain containing 3(MAP7D3)	NP|MAP7D3	NP_CT|MAP7D3	258	64.5	1	93.91	645	0	ENSG00000129680	MAP7 domain containing 3(MAP7D3)	79649	MAP7 domain containing 3(MAP7D3)
NP	NP_CT	MIS18BP1	Q6P0N0	MIS18 binding protein 1(MIS18BP1)	NP|MIS18BP1	NP_CT|MIS18BP1	68	17	1	23	170	0	ENSG00000129534	MIS18 binding protein 1(MIS18BP1)	55320	MIS18 binding protein 1(MIS18BP1)
NP	NP_CT	MTHFD1	B7Z809	C-1-tetrahydrofolate synthase, cytoplasmic	NP|MTHFD1	NP_CT|MTHFD1	60	15	1	21.5	150	0	ENSG00000100714	methylenetetrahydrofolate dehydrogenase, cyclohydrolase and formyltetrahydrofolate synthetase 1(MTHFD1)
NP	NP_CT	NAV1	Q8NEY1	neuron navigator 1(NAV1)	NP|NAV1	NP_CT|NAV1	269	67.25	1	86.78	672.5	0	ENSG00000134369	neuron navigator 1(NAV1)	89796	neuron navigator 1(NAV1)
NP	NP_CT	NCKAP5L	Q9HCH0	NCK associated protein 5 like(NCKAP5L)	NP|NCKAP5L	NP_CT|NCKAP5L	104	26	1	34.87	260	0	ENSG00000167566	NCK associated protein 5 like(NCKAP5L)	57701	NCK associated protein 5 like(NCKAP5L)
NP	NP_CT	NEDD1	A0A024RBE5	neural precursor cell expressed, developmentally down-regulated 1(NEDD1)	NP|NEDD1	NP_CT|NEDD1	346	86.5	1	14.06	98.86	0	ENSG00000139350	neural precursor cell expressed, developmentally down-regulated 1(NEDD1)	121441	neural precursor cell expressed, developmentally down-regulated 1(NEDD1)
NP	NP_CT	NFRKB	A0A024R3K9	nuclear factor related to kappaB binding protein(NFRKB)	NP|NFRKB	NP_CT|NFRKB	84	21	1	28.97	210	0	ENSG00000170322	nuclear factor related to kappaB binding protein(NFRKB)	4798	nuclear factor related to kappaB binding protein(NFRKB)
NP	NP_CT	PDLIM5	B7Z481	PDZ and LIM domain 5(PDLIM5)	NP|PDLIM5	NP_CT|PDLIM5	88	22	1	31.93	220	0	ENSG00000163110	PDZ and LIM domain 5(PDLIM5)	10611	PDZ and LIM domain 5(PDLIM5)
NP	NP_CT	PEAK1	Q9H792	pseudopodium enriched atypical kinase 1(PEAK1)	NP|PEAK1	NP_CT|PEAK1	89	22.25	1	30.45	222.5	0	ENSG00000173517	pseudopodium enriched atypical kinase 1(PEAK1)	79834	pseudopodium enriched atypical kinase 1(PEAK1)
NP	NP_CT	PIK3C2A	L7RRS0	phosphatidylinositol-4-phosphate 3-kinase catalytic subunit type 2 alpha(PIK3C2A)	NP|PIK3C2A	NP_CT|PIK3C2A	139	34.75	1	47.99	347.5	0	ENSG00000011405	phosphatidylinositol-4-phosphate 3-kinase catalytic subunit type 2 alpha(PIK3C2A)	5286	phosphatidylinositol-4-phosphate 3-kinase catalytic subunit type 2 alpha(PIK3C2A)
NP	NP_CT	PLEKHG1	Q5JYA6	pleckstrin homology and RhoGEF domain containing G1(PLEKHG1)	NP|PLEKHG1	NP_CT|PLEKHG1	108	27	1	37.8	270	0	ENSG00000120278	pleckstrin homology and RhoGEF domain containing G1(PLEKHG1)	57480	pleckstrin homology and RhoGEF domain containing G1(PLEKHG1)
NP	NP_CT	POC5	Q8NA72	POC5 centriolar protein(POC5)	NP|POC5	NP_CT|POC5	312	78	1	111	780	0	ENSG00000152359	POC5 centriolar protein(POC5)	134359	POC5 centriolar protein(POC5)
NP	NP_CT	PPM1A	P35813	protein phosphatase, Mg2+/Mn2+ dependent 1A(PPM1A)	NP|PPM1A	NP_CT|PPM1A	46	11.5	0.97	2.53	10.22	0	ENSG00000100614	protein phosphatase, Mg2+/Mn2+ dependent 1A(PPM1A)	5494	protein phosphatase, Mg2+/Mn2+ dependent 1A(PPM1A)
NP	NP_CT	PPP2R5C	Q13362	protein phosphatase 2 regulatory subunit B'gamma(PPP2R5C)	NP|PPP2R5C	NP_CT|PPP2R5C	285	71.25	1	95.34	712.5	0	ENSG00000078304	protein phosphatase 2 regulatory subunit B'gamma(PPP2R5C)	5527	protein phosphatase 2 regulatory subunit B'gamma(PPP2R5C)
NP	NP_CT	PPP2R5C	Q13362	protein phosphatase 2 regulatory subunit B'gamma(PPP2R5C)	NP|PPP2R5C	NP_CT|PPP2R5C	277	69.25	1	93.91	692.5	0	ENSG00000078304	protein phosphatase 2 regulatory subunit B'gamma(PPP2R5C)	5527	protein phosphatase 2 regulatory subunit B'gamma(PPP2R5C)
NP	NP_CT	PPP2R5D	A0A024RD11	protein phosphatase 2 regulatory subunit B'delta(PPP2R5D)	NP|PPP2R5D	NP_CT|PPP2R5D	376	94	1	15.3	125.33	0	ENSG00000112640	protein phosphatase 2 regulatory subunit B'delta(PPP2R5D)	5528	protein phosphatase 2 regulatory subunit B'delta(PPP2R5D)
NP	NP_CT	RPS2	Q3KQT6	ribosomal protein S2(RPS2)	NP|RPS2	NP_CT|RPS2	53	13.25	1	15.38	132.5	0	ENSG00000140988	ribosomal protein S2(RPS2)	6187	ribosomal protein S2(RPS2)
NP	NP_CT	SDCCAG3	Q96C92	serologically defined colon cancer antigen 3(SDCCAG3)	NP|SDCCAG3	NP_CT|SDCCAG3	73	18.25	1	26	182.5	0	ENSG00000165689	serologically defined colon cancer antigen 3(SDCCAG3)	10807	serologically defined colon cancer antigen 3(SDCCAG3)
NP	NP_CT	SH3PXD2B	A1X283	SH3 and PX domains 2B(SH3PXD2B)	NP|SH3PXD2B	NP_CT|SH3PXD2B	33	8.25	1	13.82	82.5	0	ENSG00000174705	SH3 and PX domains 2B(SH3PXD2B)	285590	SH3 and PX domains 2B(SH3PXD2B)
NP	NP_CT	SIPA1L2	Q9P2F8	signal induced proliferation associated 1 like 2(SIPA1L2)	NP|SIPA1L2	NP_CT|SIPA1L2	68	17	1	24.5	170	0	ENSG00000116991	signal induced proliferation associated 1 like 2(SIPA1L2)	57568	signal induced proliferation associated 1 like 2(SIPA1L2)
NP	NP_CT	SKA1	A0A024R294	spindle and kinetochore associated complex subunit 1(SKA1)	NP|SKA1	NP_CT|SKA1	30	7.5	1	8.99	75	0	ENSG00000154839	spindle and kinetochore associated complex subunit 1(SKA1)	220134	spindle and kinetochore associated complex subunit 1(SKA1)
NP	NP_CT	SYNJ2	O15056	synaptojanin 2(SYNJ2)	NP|SYNJ2	NP_CT|SYNJ2	130	32.5	1	45.09	325	0	ENSG00000078269	synaptojanin 2(SYNJ2)	8871	synaptojanin 2(SYNJ2)
NP	NP_CT	TAB3	Q8N5C8	TGF-beta activated kinase 1/MAP3K7 binding protein 3(TAB3)	NP|TAB3	NP_CT|TAB3	40	10	1	12.24	100	0	ENSG00000157625	TGF-beta activated kinase 1/MAP3K7 binding protein 3(TAB3)	257397	TGF-beta activated kinase 1/MAP3K7 binding protein 3(TAB3)
NP	NP_CT	TANC1	Q9C0D5	tetratricopeptide repeat, ankyrin repeat and coiled-coil containing 1(TANC1)	NP|TANC1	NP_CT|TANC1	496	124	1	10.23	70.86	0	ENSG00000115183	tetratricopeptide repeat, ankyrin repeat and coiled-coil containing 1(TANC1)	85461	tetratricopeptide repeat, ankyrin repeat and coiled-coil containing 1(TANC1)
NP	NP_CT	TP53	B6E4X6	Cellular tumor antigen p53	NP|TP53	NP_CT|TP53	291	72.75	1	106.73	727.5	0	ENSG00000141510	tumor protein p53(TP53)
NP	NP_CT	TP53	E5RMA8	tumor protein p53(TP53)	NP|TP53	NP_CT|TP53	312	78	1	9.03	28.36	0	ENSG00000141510	tumor protein p53(TP53)
NP	NP_CT	TRIM25	Q59GW5	Tripartite motif-containing 25 variant	NP|TRIM25	NP_CT|TRIM25	250	62.5	0.99	4.54	10.64	0
NP	NP_CT	TTF2	A0A024R0F1	transcription termination factor 2(TTF2)	NP|TTF2	NP_CT|TTF2	474	118.5	1	6.15	11.15	0	ENSG00000116830	transcription termination factor 2(TTF2)	8458	transcription termination factor 2(TTF2)
NP	NP_CT	TUBGCP2	Q9BSJ2	tubulin gamma complex associated protein 2(TUBGCP2)	NP|TUBGCP2	NP_CT|TUBGCP2	128	32	1	40.72	320	0	ENSG00000130640	tubulin gamma complex associated protein 2(TUBGCP2)	10844	tubulin gamma complex associated protein 2(TUBGCP2)
NP	NP_CT	TUBGCP3	Q96CW5	tubulin gamma complex associated protein 3(TUBGCP3)	NP|TUBGCP3	NP_CT|TUBGCP3	67	16.75	1	24.5	167.5	0	ENSG00000126216	tubulin gamma complex associated protein 3(TUBGCP3)	10426	tubulin gamma complex associated protein 3(TUBGCP3)
NP	NP_CT	TUBGCP4	Q9UGJ1	tubulin gamma complex associated protein 4(TUBGCP4)	NP|TUBGCP4	NP_CT|TUBGCP4	61	15.25	1	16.93	152.5	0	ENSG00000137822	tubulin gamma complex associated protein 4(TUBGCP4)	27229	tubulin gamma complex associated protein 4(TUBGCP4)
NP	NP_CT	TUFT1	B7Z4Y1	tuftelin 1(TUFT1)	NP|TUFT1	NP_CT|TUFT1	46	11.5	1	13.82	115	0	ENSG00000143367	tuftelin 1(TUFT1)	7286	tuftelin 1(TUFT1)
NP	NP_CT	UBN2	Q6ZU65	ubinuclein 2(UBN2)	NP|UBN2	NP_CT|UBN2	114	28.5	1	40.72	285	0	ENSG00000157741	ubinuclein 2(UBN2)	254048	ubinuclein 2(UBN2)
NP	NP_CT	USP53	Q70EK8	ubiquitin specific peptidase 53(USP53)	NP|USP53	NP_CT|USP53	59	14.75	1	18.46	147.5	0	ENSG00000145390	ubiquitin specific peptidase 53(USP53)	54532	ubiquitin specific peptidase 53(USP53)
NP	NP_CT	ZC3H7A	Q8IWR0	zinc finger CCCH-type containing 7A(ZC3H7A)	NP|ZC3H7A	NP_CT|ZC3H7A	66	16.5	1	21.5	165	0	ENSG00000122299	zinc finger CCCH-type containing 7A(ZC3H7A)	29066	zinc finger CCCH-type containing 7A(ZC3H7A)
NP	NP_NT	AP1G1	A0A140VJE7	adaptor related protein complex 1 gamma 1 subunit(AP1G1)	NP|AP1G1	NP_NT|AP1G1	71	17.75	1	19.8	177.5	0	ENSG00000166747	adaptor related protein complex 1 gamma 1 subunit(AP1G1)	164	adaptor related protein complex 1 gamma 1 subunit(AP1G1)
NP	NP_NT	ATP6V1A	P38606	ATPase H+ transporting V1 subunit A(ATP6V1A)	NP|ATP6V1A	NP_NT|ATP6V1A	129	32.25	0.99	4	18.43	0	ENSG00000114573	ATPase H+ transporting V1 subunit A(ATP6V1A)	523	ATPase H+ transporting V1 subunit A(ATP6V1A)
NP	NP_NT	BACH1	O14867	BTB domain and CNC homolog 1(BACH1)	NP|BACH1	NP_NT|BACH1	109	27.25	0.99	5.07	19.82	0			571	BTB domain and CNC homolog 1(BACH1)
NP	NP_NT	COBL	O75128	cordon-bleu WH2 repeat protein(COBL)	NP|COBL	NP_NT|COBL	233	58.25	1	80.88	582.5	0	ENSG00000106078	cordon-bleu WH2 repeat protein(COBL)	23242	cordon-bleu WH2 repeat protein(COBL)
NP	NP_NT	CPNE5	Q9HCH3	copine 5(CPNE5)	NP|CPNE5	NP_NT|CPNE5	36	9	0.95	2.73	9	0.01	ENSG00000124772	copine 5(CPNE5)	57699	copine 5(CPNE5)
NP	NP_NT	FAM117B	Q6P1L5	family with sequence similarity 117 member B(FAM117B)	NP|FAM117B	NP_NT|FAM117B	30	7.5	0.93	1.86	8.57	0.01	ENSG00000138439	family with sequence similarity 117 member B(FAM117B)	150864	family with sequence similarity 117 member B(FAM117B)
NP	NP_NT	GNE	Q6QNY5	glucosamine (UDP-N-acetyl)-2-epimerase/N-acetylmannosamine kinase(GNE)	NP|GNE	NP_NT|GNE	46	11.5	1	16.74	115	0	ENSG00000159921	glucosamine (UDP-N-acetyl)-2-epimerase/N-acetylmannosamine kinase(GNE)	10020	glucosamine (UDP-N-acetyl)-2-epimerase/N-acetylmannosamine kinase(GNE)
NP	NP_NT	KNL1	Q8NG31	kinetochore scaffold 1(KNL1)	NP|KNL1	NP_NT|KNL1	440	110	0.99	4.46	7.52	0	ENSG00000137812	kinetochore scaffold 1(KNL1)	57082	kinetochore scaffold 1(KNL1)
NP	NP_NT	MSN	V9HWC0	moesin(MSN)	NP|MSN	NP_NT|MSN	50	12.5	1	18.28	125	0	ENSG00000147065	moesin(MSN)	4478	moesin(MSN)
NP	NP_NT	NMT1	Q96HI4	N-myristoyltransferase 1(NMT1)	NP|NMT1	NP_NT|NMT1	23	5.75	1	7.13	57.5	0	ENSG00000136448	N-myristoyltransferase 1(NMT1)	4836	N-myristoyltransferase 1(NMT1)
NP	NP_NT	POLR3D	P05423	RNA polymerase III subunit D(POLR3D)	NP|POLR3D	NP_NT|POLR3D	37	9.25	1	10.45	92.5	0	ENSG00000168495	RNA polymerase III subunit D(POLR3D)	661	RNA polymerase III subunit D(POLR3D)
NP	NP_NT	PPP2R2A	A0A140VJT0	protein phosphatase 2 regulatory subunit Balpha(PPP2R2A)	NP|PPP2R2A	NP_NT|PPP2R2A	25	6.25	1	8.81	62.5	0	ENSG00000221914	protein phosphatase 2 regulatory subunit Balpha(PPP2R2A)	5520	protein phosphatase 2 regulatory subunit Balpha(PPP2R2A)
NP	NP_NT	RBBP4	Q09028	RB binding protein 4, chromatin remodeling factor(RBBP4)	NP|RBBP4	NP_NT|RBBP4	114	28.5	1	40.54	285	0	ENSG00000162521	RB binding protein 4, chromatin remodeling factor(RBBP4)	5928	RB binding protein 4, chromatin remodeling factor(RBBP4)
NP	NP_NT	RBBP7	Q6FHQ0	RB binding protein 7, chromatin remodeling factor(RBBP7)	NP|RBBP7	NP_NT|RBBP7	225	56.25	1	79.45	562.5	0	ENSG00000102054	RB binding protein 7, chromatin remodeling factor(RBBP7)	5931	RB binding protein 7, chromatin remodeling factor(RBBP7)
NP	NP_NT	RPL17	A0A024R261	ribosomal protein L17(RPL17)	NP|RPL17	NP_NT|RPL17	43	10.75	1	16.74	107.5	0	ENSG00000265681	ribosomal protein L17(RPL17)	6139	ribosomal protein L17(RPL17)
NP	NP_NT	RPS10	P46783	ribosomal protein S10(RPS10)	NP|RPS10	NP_NT|RPS10	42	10.5	1	15.2	105	0	ENSG00000124614	ribosomal protein S10(RPS10)	6204	ribosomal protein S10(RPS10)
NP	NP_NT	RPS12	P25398	ribosomal protein S12(RPS12)	NP|RPS12	NP_NT|RPS12	35	8.75	1	10.45	87.5	0	ENSG00000112306	ribosomal protein S12(RPS12)	6206	ribosomal protein S12(RPS12)
NP	NP_NT	RPS14	P62263	ribosomal protein S14(RPS14)	NP|RPS14	NP_NT|RPS14	34	8.5	1	12.05	85	0	ENSG00000164587	ribosomal protein S14(RPS14)	6208	ribosomal protein S14(RPS14)
NP	NP_NT	RPS20	P60866	ribosomal protein S20(RPS20)	NP|RPS20	NP_NT|RPS20	33	8.25	1	10.45	82.5	0	ENSG00000008988	ribosomal protein S20(RPS20)	6224	ribosomal protein S20(RPS20)
NP	NP_NT	RPS27	Q5T4L4	ribosomal protein S27(RPS27)	NP|RPS27	NP_NT|RPS27	37	9.25	1	10.45	92.5	0	ENSG00000177954	ribosomal protein S27(RPS27)	6232	ribosomal protein S27(RPS27)
NP	NP_NT	RPS28	B2R4R9	ribosomal protein S28(RPS28)	NP|RPS28	NP_NT|RPS28	22	5.5	1	7.13	55	0	ENSG00000233927	ribosomal protein S28(RPS28)	6234	ribosomal protein S28(RPS28)
NP	NP_NT	SND1	A0A140VK49	staphylococcal nuclease and tudor domain containing 1(SND1)	NP|SND1	NP_NT|SND1	173	43.25	1	60.8	432.5	0	ENSG00000197157	staphylococcal nuclease and tudor domain containing 1(SND1)	27044	staphylococcal nuclease and tudor domain containing 1(SND1)
NP	NP_NT	SNX3	O60493	sorting nexin 3(SNX3)	NP|SNX3	NP_NT|SNX3	23	5.75	0.94	2.41	9.2	0.01	ENSG00000112335	sorting nexin 3(SNX3)	8724	sorting nexin 3(SNX3)
NP	NP_NT	SOS1	G5E9C8	SOS Ras/Rac guanine nucleotide exchange factor 1(SOS1)	NP|SOS1	NP_NT|SOS1	36	9	1	13.64	90	0	ENSG00000115904	SOS Ras/Rac guanine nucleotide exchange factor 1(SOS1)	6654	SOS Ras/Rac guanine nucleotide exchange factor 1(SOS1)
NP	NP_NT	SRSF3	A0A087X2D0	serine and arginine rich splicing factor 3(SRSF3)	NP|SRSF3	NP_NT|SRSF3	16	4	0.99	3.55	40	0	ENSG00000112081	serine and arginine rich splicing factor 3(SRSF3)	6428	serine and arginine rich splicing factor 3(SRSF3)
NP	NP_NT	TPT1	A0A0B4J2C3	tumor protein, translationally-controlled 1(TPT1)	NP|TPT1	NP_NT|TPT1	36	9	1	13.64	90	0	ENSG00000133112	tumor protein, translationally-controlled 1(TPT1)	7178	tumor protein, translationally-controlled 1(TPT1)
NP	NP_NT	ZNF507	Q8TCN5	zinc finger protein 507(ZNF507)	NP|ZNF507	NP_NT|ZNF507	101	25.25	1	33.22	252.5	0	ENSG00000168813	zinc finger protein 507(ZNF507)	22847	zinc finger protein 507(ZNF507)
VP24	VP24_CT	BCCIP	Q9P287	BRCA2 and CDKN1A interacting protein(BCCIP)	VP24|BCCIP	VP24_CT|BCCIP	142	35.5	0.99	4.16	11.83	0	ENSG00000107949	BRCA2 and CDKN1A interacting protein(BCCIP)	56647	BRCA2 and CDKN1A interacting protein(BCCIP)
VP24	VP24_CT	CACUL1	Q86Y37	CDK2 associated cullin domain 1(CACUL1)	VP24|CACUL1	VP24_CT|CACUL1	87	21.75	1	31.27	217.5	0	ENSG00000151893	CDK2 associated cullin domain 1(CACUL1)	143384	CDK2 associated cullin domain 1(CACUL1)
VP24	VP24_CT	CCAR2	B3KTJ9	Cell cycle and apoptosis regulator protein 2	VP24|CCAR2	VP24_CT|CCAR2	198	49.5	0.96	2.72	5.91	0	ENSG00000158941	cell cycle and apoptosis regulator 2(CCAR2)
VP24	VP24_CT	GATAD2B	A0A0U1RRM1	GATA zinc finger domain containing 2B(GATAD2B)	VP24|GATAD2B	VP24_CT|GATAD2B	86	21.5	0.94	2.42	6.37	0.01	ENSG00000143614	GATA zinc finger domain containing 2B(GATAD2B)	57459	GATA zinc finger domain containing 2B(GATAD2B)
VP24	VP24_CT	GTF2A1	P52655	general transcription factor IIA subunit 1(GTF2A1)	VP24|GTF2A1	VP24_CT|GTF2A1	59	14.75	1	20.84	147.5	0	ENSG00000165417	general transcription factor IIA subunit 1(GTF2A1)	2957	general transcription factor IIA subunit 1(GTF2A1)
VP24	VP24_CT	ICE1	Q9Y2F5	interactor of little elongation complex ELL subunit 1(ICE1)	VP24|ICE1	VP24_CT|ICE1	214	53.5	1	67.52	535	0	ENSG00000164151	interactor of little elongation complex ELL subunit 1(ICE1)	23379	interactor of little elongation complex ELL subunit 1(ICE1)
VP24	VP24_CT	ICE2	A0A024R5V9	interactor of little elongation complex ELL subunit 2(ICE2)	VP24|ICE2	VP24_CT|ICE2	78	19.5	1	25.34	195	0	ENSG00000128915	interactor of little elongation complex ELL subunit 2(ICE2)	79664	interactor of little elongation complex ELL subunit 2(ICE2)
VP24	VP24_CT	KPNA1	P52294	karyopherin subunit alpha 1(KPNA1)	VP24|KPNA1	VP24_CT|KPNA1	580	145	1	203.86	1450	0	ENSG00000114030	karyopherin subunit alpha 1(KPNA1)	3836	karyopherin subunit alpha 1(KPNA1)
VP24	VP24_CT	KPNA6	B4DWX3	Importin subunit alpha-7	VP24|KPNA6	VP24_CT|KPNA6	717	179.25	1	251.87	1792.5	0	ENSG00000025800	karyopherin subunit alpha 6(KPNA6)
VP24	VP24_CT	MTA2	A0A024R534	metastasis associated 1 family member 2(MTA2)	VP24|MTA2	VP24_CT|MTA2	59	14.75	0.94	2.57	9.08	0.01	ENSG00000149480	metastasis associated 1 family member 2(MTA2)	9219	metastasis associated 1 family member 2(MTA2)
VP24	VP24_CT	NIFK	Q9BYG3	nucleolar protein interacting with the FHA domain of MKI67(NIFK)	VP24|NIFK	VP24_CT|NIFK	134	33.5	1	8.16	53.6	0	ENSG00000155438	nucleolar protein interacting with the FHA domain of MKI67(NIFK)	84365	nucleolar protein interacting with the FHA domain of MKI67(NIFK)
VP24	VP24_CT	NUP62	A0A024QZF1	nucleoporin 62(NUP62)	VP24|NUP62	VP24_CT|NUP62	60	15	0.98	3.06	9.23	0	ENSG00000213024	nucleoporin 62(NUP62)	23636	nucleoporin 62(NUP62)
VP24	VP24_CT	POLR3C	A0A024R4C1	RNA polymerase III subunit C(POLR3C)	VP24|POLR3C	VP24_CT|POLR3C	95	23.75	1	32.75	237.5	0	ENSG00000186141	RNA polymerase III subunit C(POLR3C)	10623	RNA polymerase III subunit C(POLR3C)
VP24	VP24_CT	POM121C	A0A075B7F8	POM121 transmembrane nucleoporin C(POM121C)	VP24|POM121C	VP24_CT|POM121C	190	47.5	1	64.64	475	0	ENSG00000272391	POM121 transmembrane nucleoporin C(POM121C)	100101267	POM121 transmembrane nucleoporin C(POM121C)
VP24	VP24_CT	PTPN2	A8K3N4	protein tyrosine phosphatase, non-receptor type 2(PTPN2)	VP24|PTPN2	VP24_CT|PTPN2	65	16.25	0.98	3.18	14.44	0	ENSG00000175354	protein tyrosine phosphatase, non-receptor type 2(PTPN2)	5771	protein tyrosine phosphatase, non-receptor type 2(PTPN2)
VP24	VP24_CT	TAF1	P21675	TATA-box binding protein associated factor 1(TAF1)	VP24|TAF1	VP24_CT|TAF1	282	70.5	1	88.98	705	0	ENSG00000147133	TATA-box binding protein associated factor 1(TAF1)	6872	TATA-box binding protein associated factor 1(TAF1)
VP24	VP24_CT	TAF4	O00268	TATA-box binding protein associated factor 4(TAF4)	VP24|TAF4	VP24_CT|TAF4	41	10.25	1	11.58	102.5	0			6874	TATA-box binding protein associated factor 4(TAF4)
VP24	VP24_CT	WDR12	Q9GZL7	WD repeat domain 12(WDR12)	VP24|WDR12	VP24_CT|WDR12	113	28.25	1	38.61	282.5	0	ENSG00000138442	WD repeat domain 12(WDR12)	55759	WD repeat domain 12(WDR12)
VP24	VP24_NT	CSE1L	P55060	chromosome segregation 1 like(CSE1L)	VP24|CSE1L	VP24_NT|CSE1L	1866	466.5	1	12.72	21.7	0	ENSG00000124207	chromosome segregation 1 like(CSE1L)	1434	chromosome segregation 1 like(CSE1L)
VP24	VP24_NT	EIF2S2	B5BU01	eukaryotic translation initiation factor 2 subunit beta(EIF2S2)	VP24|EIF2S2	VP24_NT|EIF2S2	16	4	1	5.16	40	0	ENSG00000125977	eukaryotic translation initiation factor 2 subunit beta(EIF2S2)	8894	eukaryotic translation initiation factor 2 subunit beta(EIF2S2)
VP24	VP24_NT	IPO9	Q96P70	importin 9(IPO9)	VP24|IPO9	VP24_NT|IPO9	21	5.25	1	6.91	52.5	0	ENSG00000198700	importin 9(IPO9)	55705	importin 9(IPO9)
VP24	VP24_NT	JPH1	Q4KMX3	junctophilin 1(JPH1)	VP24|JPH1	VP24_NT|JPH1	65	16.25	1	19.57	162.5	0	ENSG00000104369	junctophilin 1(JPH1)	56704	junctophilin 1(JPH1)
VP24	VP24_NT	KPNA2	Q6NVW7	karyopherin subunit alpha 2(KPNA2)	VP24|KPNA2	VP24_NT|KPNA2	200	50	1	67.76	500	0	ENSG00000182481	karyopherin subunit alpha 2(KPNA2)	3838	karyopherin subunit alpha 2(KPNA2)
VP24	VP24_NT	MCM3AP	O60318	minichromosome maintenance complex component 3 associated protein(MCM3AP)	VP24|MCM3AP	VP24_NT|MCM3AP	253	63.25	1	82.08	632.5	0	ENSG00000160294	minichromosome maintenance complex component 3 associated protein(MCM3AP)	8888	minichromosome maintenance complex component 3 associated protein(MCM3AP)
VP24	VP24_NT	OSBPL8	A0A024RBB8	oxysterol binding protein like 8(OSBPL8)	VP24|OSBPL8	VP24_NT|OSBPL8	499	124.75	1	37.45	332.67	0	ENSG00000091039	oxysterol binding protein like 8(OSBPL8)	114882	oxysterol binding protein like 8(OSBPL8)
VP24	VP24_NT	POM121	Q96HA1	POM121 transmembrane nucleoporin(POM121)	VP24|POM121	VP24_NT|POM121	149	37.25	1	50.48	372.5	0	ENSG00000196313	POM121 transmembrane nucleoporin(POM121)	9883	POM121 transmembrane nucleoporin(POM121)
VP24	VP24_NT	RPS25	P62851	ribosomal protein S25(RPS25)	VP24|RPS25	VP24_NT|RPS25	17	4.25	1	6.91	42.5	0	ENSG00000118181	ribosomal protein S25(RPS25)	6230	ribosomal protein S25(RPS25)
VP24	VP24_NT	SPDL1	Q96EA4	spindle apparatus coiled-coil protein 1(SPDL1)	VP24|SPDL1	VP24_NT|SPDL1	35	8.75	1	11.83	87.5	0	ENSG00000040275	spindle apparatus coiled-coil protein 1(SPDL1)	54908	spindle apparatus coiled-coil protein 1(SPDL1)
VP24	VP24_NT	TAF9	Q16594	TATA-box binding protein associated factor 9(TAF9)	VP24|TAF9	VP24_NT|TAF9	98	24.5	0.93	2.12	5.3	0.01	ENSG00000273841	TATA-box binding protein associated factor 9(TAF9)	6880	TATA-box binding protein associated factor 9(TAF9)
VP24	VP24_NT	TAF9B	Q9HBM6	TATA-box binding protein associated factor 9b(TAF9B)	VP24|TAF9B	VP24_NT|TAF9B	79	19.75	1	27.08	197.5	0	ENSG00000187325	TATA-box binding protein associated factor 9b(TAF9B)	51616	TATA-box binding protein associated factor 9b(TAF9B)
VP24	VP24_NT	TCP1	P17987	t-complex 1(TCP1)	VP24|TCP1	VP24_NT|TCP1	60	15	1	14.97	150	0	ENSG00000120438	t-complex 1(TCP1)	6950	t-complex 1(TCP1)
VP24	VP24_NT	USP9X	Q93008	ubiquitin specific peptidase 9, X-linked(USP9X)	VP24|USP9X	VP24_NT|USP9X	63	15.75	1	19.57	157.5	0	ENSG00000124486	ubiquitin specific peptidase 9, X-linked(USP9X)	8239	ubiquitin specific peptidase 9, X-linked(USP9X)
VP24	VP24_NT	WASF1	Q92558	WAS protein family member 1(WASF1)	VP24|WASF1	VP24_NT|WASF1	49	12.25	1	16.52	122.5	0	ENSG00000112290	WAS protein family member 1(WASF1)	8936	WAS protein family member 1(WASF1)
VP24	VP24_NT	WASF2	Q9Y6W5	WAS protein family member 2(WASF2)	VP24|WASF2	VP24_NT|WASF2	158	39.5	1	53.37	395	0	ENSG00000158195	WAS protein family member 2(WASF2)	10163	WAS protein family member 2(WASF2)
VP30	VP30_CT	AFDN	P55196	afadin, adherens junction formation factor(AFDN)	VP30|AFDN	VP30_CT|AFDN	211	52.75	1	70.06	527.5	0	ENSG00000130396	afadin, adherens junction formation factor(AFDN)	4301	afadin, adherens junction formation factor(AFDN)
VP30	VP30_CT	AFDN	A8MQ02	afadin, adherens junction formation factor(AFDN)	VP30|AFDN	VP30_CT|AFDN	214	53.5	1	72.93	535	0	ENSG00000130396	afadin, adherens junction formation factor(AFDN)
VP30	VP30_CT	LARP4	Q71RC2	La ribonucleoprotein domain family member 4(LARP4)	VP30|LARP4	VP30_CT|LARP4	36	9	1	11.26	90	0	ENSG00000161813	La ribonucleoprotein domain family member 4(LARP4)	113251	La ribonucleoprotein domain family member 4(LARP4)
VP30	VP30_CT	LARP4B	Q92615	La ribonucleoprotein domain family member 4B(LARP4B)	VP30|LARP4B	VP30_CT|LARP4B	56	14	0.99	3.61	28	0	ENSG00000107929	La ribonucleoprotein domain family member 4B(LARP4B)	23185	La ribonucleoprotein domain family member 4B(LARP4B)
VP30	VP30_CT	MAPT	A0A024R9Y0	microtubule associated protein tau(MAPT)	VP30|MAPT	VP30_CT|MAPT	32	8	1	9.65	80	0	ENSG00000186868	microtubule associated protein tau(MAPT)	4137	microtubule associated protein tau(MAPT)
VP30	VP30_CT	PABPC1	A0A024R9C1	poly(A) binding protein cytoplasmic 1(PABPC1)	VP30|PABPC1	VP30_CT|PABPC1	209	52.25	1	7.2	46.44	0			26986	poly(A) binding protein cytoplasmic 1(PABPC1)
VP30	VP30_CT	RBMS1	A0A0S2Z499	RNA binding motif single stranded interacting protein 1(RBMS1)	VP30|RBMS1	VP30_CT|RBMS1	26	6.5	1	8.02	65	0			5937	RNA binding motif single stranded interacting protein 1(RBMS1)
VP30	VP30_NT	MPHOSPH9	A0A0A0MTP3	M-phase phosphoprotein 9(MPHOSPH9)	VP30|MPHOSPH9	VP30_NT|MPHOSPH9	54	13.5	1	14.56	135	0	ENSG00000051825	M-phase phosphoprotein 9(MPHOSPH9)	10198	M-phase phosphoprotein 9(MPHOSPH9)
VP30	VP30_NT	RBBP6	Q7Z6E9	RB binding protein 6, ubiquitin ligase(RBBP6)	VP30|RBBP6	VP30_NT|RBBP6	1008	252	1	10.48	27.62	0	ENSG00000122257	RB binding protein 6, ubiquitin ligase(RBBP6)	5930	RB binding protein 6, ubiquitin ligase(RBBP6)
VP30	VP30_NT	SRPK2	A0A024R704	SRSF protein kinase 2(SRPK2)	VP30|SRPK2	VP30_NT|SRPK2	58	14.5	1	19.17	145	0	ENSG00000135250	SRSF protein kinase 2(SRPK2)	6733	SRSF protein kinase 2(SRPK2)
VP30	VP30_NT	TCEB2	I3L0M9	transcription elongation factor B subunit 2(TCEB2)	VP30|TCEB2	VP30_NT|TCEB2	11	2.75	0.97	2.52	22	0	ENSG00000103363	transcription elongation factor B subunit 2(TCEB2)	6923	transcription elongation factor B subunit 2(TCEB2)
VP30	VP30_NT	WIPF2	Q8TF74	WAS/WASL interacting protein family member 2(WIPF2)	VP30|WIPF2	VP30_NT|WIPF2	132	33	1	38.44	330	0	ENSG00000171475	WAS/WASL interacting protein family member 2(WIPF2)	147179	WAS/WASL interacting protein family member 2(WIPF2)
VP30	VP30_NT	YEATS2	Q9ULM3	YEATS domain containing 2(YEATS2)	VP30|YEATS2	VP30_NT|YEATS2	113	28.25	0.95	1.58	10.76	0.01	ENSG00000163872	YEATS domain containing 2(YEATS2)	55689	YEATS domain containing 2(YEATS2)
VP35	VP35_NT	CNOT11	Q9UKZ1	CCR4-NOT transcription complex subunit 11(CNOT11)	VP35|CNOT11	VP35_NT|CNOT11	79	19.75	1	28.8	197.5	0	ENSG00000158435	CCR4-NOT transcription complex subunit 11(CNOT11)	55571	CCR4-NOT transcription complex subunit 11(CNOT11)
VP35	VP35_NT	DCP1B	Q8IZD4	decapping mRNA 1B(DCP1B)	VP35|DCP1B	VP35_NT|DCP1B	259	64.75	1	35.04	259	0	ENSG00000151065	decapping mRNA 1B(DCP1B)	196513	decapping mRNA 1B(DCP1B)
VP35	VP35_NT	DCP2	Q8IU60	decapping mRNA 2(DCP2)	VP35|DCP2	VP35_NT|DCP2	117	29.25	1	43.46	292.5	0	ENSG00000172795	decapping mRNA 2(DCP2)	167227	decapping mRNA 2(DCP2)
VP35	VP35_NT	DDX6	P26196	DEAD-box helicase 6(DDX6)	VP35|DDX6	VP35_NT|DDX6	162	40.5	1	52.16	405	0	ENSG00000110367	DEAD-box helicase 6(DDX6)	1656	DEAD-box helicase 6(DDX6)
VP35	VP35_NT	DYNLL1	Q6FGH9	dynein light chain LC8-type 1(DYNLL1)	VP35|DYNLL1	VP35_NT|DYNLL1	137	34.25	1	42.01	342.5	0	ENSG00000088986	dynein light chain LC8-type 1(DYNLL1)	8655	dynein light chain LC8-type 1(DYNLL1)
VP35	VP35_NT	DYNLL2	Q96FJ2	dynein light chain LC8-type 2(DYNLL2)	VP35|DYNLL2	VP35_NT|DYNLL2	92	23	1	33.23	230	0	ENSG00000264364	dynein light chain LC8-type 2(DYNLL2)	140735	dynein light chain LC8-type 2(DYNLL2)
VP35	VP35_NT	EDC3	Q96F86	enhancer of mRNA decapping 3(EDC3)	VP35|EDC3	VP35_NT|EDC3	257	64.25	1	88.04	642.5	0	ENSG00000179151	enhancer of mRNA decapping 3(EDC3)	80153	enhancer of mRNA decapping 3(EDC3)
VP35	VP35_NT	EDC4	Q6P2E9	enhancer of mRNA decapping 4(EDC4)	VP35|EDC4	VP35_NT|EDC4	2273	568.25	1	7.86	11.28	0	ENSG00000038358	enhancer of mRNA decapping 4(EDC4)	23644	enhancer of mRNA decapping 4(EDC4)
VP35	VP35_NT	EIF4ENIF1	A0A024R1K0	eukaryotic translation initiation factor 4E nuclear import factor 1(EIF4ENIF1)	VP35|EIF4ENIF1	VP35_NT|EIF4ENIF1	168	42	1	46.37	420	0	ENSG00000184708	eukaryotic translation initiation factor 4E nuclear import factor 1(EIF4ENIF1)	56478	eukaryotic translation initiation factor 4E nuclear import factor 1(EIF4ENIF1)
VP35	VP35_NT	FAM193A	A0A1B0GVL4	family with sequence similarity 193 member A(FAM193A)	VP35|FAM193A	VP35_NT|FAM193A	47	11.75	1	16.76	117.5	0	ENSG00000125386	family with sequence similarity 193 member A(FAM193A)	8603	family with sequence similarity 193 member A(FAM193A)
VP35	VP35_NT	GAS8	O95995	growth arrest specific 8(GAS8)	VP35|GAS8	VP35_NT|GAS8	110	27.5	1	37.63	275	0	ENSG00000141013	growth arrest specific 8(GAS8)	2622	growth arrest specific 8(GAS8)
VP35	VP35_NT	GIGYF1	O75420	GRB10 interacting GYF protein 1(GIGYF1)	VP35|GIGYF1	VP35_NT|GIGYF1	48	12	1	15.21	120	0	ENSG00000146830	GRB10 interacting GYF protein 1(GIGYF1)	64599	GRB10 interacting GYF protein 1(GIGYF1)
VP35	VP35_NT	IGF2BP2	F8W930	insulin like growth factor 2 mRNA binding protein 2(IGF2BP2)	VP35|IGF2BP2	VP35_NT|IGF2BP2	172	43	1	6.51	21.5	0	ENSG00000073792	insulin like growth factor 2 mRNA binding protein 2(IGF2BP2)	10644	insulin like growth factor 2 mRNA binding protein 2(IGF2BP2)
VP35	VP35_NT	IGF2BP3	O00425	insulin like growth factor 2 mRNA binding protein 3(IGF2BP3)	VP35|IGF2BP3	VP35_NT|IGF2BP3	68	17	1	19.81	170	0	ENSG00000136231	insulin like growth factor 2 mRNA binding protein 3(IGF2BP3)	10643	insulin like growth factor 2 mRNA binding protein 3(IGF2BP3)
VP35	VP35_NT	JCAD	Q9P266	junctional cadherin 5 associated	VP35|JCAD	VP35_NT|JCAD	177	44.25	1	60.82	442.5	0			57608	KIAA1462(KIAA1462)
VP35	VP35_NT	LSM14A	Q8ND56	LSM14A, mRNA processing body assembly factor(LSM14A)	VP35|LSM14A	VP35_NT|LSM14A	95	23.75	1	33.23	237.5	0	ENSG00000257103	LSM14A, mRNA processing body assembly factor(LSM14A)	26065	LSM14A, mRNA processing body assembly factor(LSM14A)
VP35	VP35_NT	LSM14B	Q9BX40	LSM family member 14B(LSM14B)	VP35|LSM14B	VP35_NT|LSM14B	69	17.25	1	4.96	23	0	ENSG00000149657	LSM family member 14B(LSM14B)	149986	LSM family member 14B(LSM14B)
VP35	VP35_NT	MEIOC	A2RUB1	meiosis specific with coiled-coil domain(MEIOC)	VP35|MEIOC	VP35_NT|MEIOC	96	24	1	30.28	240	0	ENSG00000180336	meiosis specific with coiled-coil domain(MEIOC)	284071	meiosis specific with coiled-coil domain(MEIOC)
VP35	VP35_NT	PATL1	Q86TB9	PAT1 homolog 1, processing body mRNA decay factor(PATL1)	VP35|PATL1	VP35_NT|PATL1	257	64.25	1	90.89	642.5	0	ENSG00000166889	PAT1 homolog 1, processing body mRNA decay factor(PATL1)	219988	PAT1 homolog 1, processing body mRNA decay factor(PATL1)
VP35	VP35_NT	PDLIM7	Q9NR12	PDZ and LIM domain 7(PDLIM7)	VP35|PDLIM7	VP35_NT|PDLIM7	23	5.75	1	8.83	57.5	0	ENSG00000196923	PDZ and LIM domain 7(PDLIM7)	9260	PDZ and LIM domain 7(PDLIM7)
VP35	VP35_NT	RC3H1	Q5TC82	ring finger and CCCH-type domains 1(RC3H1)	VP35|RC3H1	VP35_NT|RC3H1	85	21.25	1	27.32	212.5	0	ENSG00000135870	ring finger and CCCH-type domains 1(RC3H1)	149041	ring finger and CCCH-type domains 1(RC3H1)
VP35	VP35_NT	RC3H2	A0A024R899	ring finger and CCCH-type domains 2(RC3H2)	VP35|RC3H2	VP35_NT|RC3H2	74	18.5	1	22.84	185	0	ENSG00000056586	ring finger and CCCH-type domains 2(RC3H2)	54542	ring finger and CCCH-type domains 2(RC3H2)
VP35	VP35_NT	RNF214	A0A024R3D4	ring finger protein 214(RNF214)	VP35|RNF214	VP35_NT|RNF214	36	9	1	8.83	90	0	ENSG00000167257	ring finger protein 214(RNF214)	257160	ring finger protein 214(RNF214)
VP35	VP35_NT	SMG7	Q92540	SMG7, nonsense mediated mRNA decay factor(SMG7)	VP35|SMG7	VP35_NT|SMG7	204	51	1	6.26	29.14	0	ENSG00000116698	SMG7, nonsense mediated mRNA decay factor(SMG7)	9887	SMG7, nonsense mediated mRNA decay factor(SMG7)
VP35	VP35_NT	SPATA2	B3KN08	Spermatogenesis-associated protein 2	VP35|SPATA2	VP35_NT|SPATA2	29	7.25	1	8.83	72.5	0	ENSG00000158480	spermatogenesis associated 2(SPATA2)
VP35	VP35_NT	TNRC6A	Q8NDV7	trinucleotide repeat containing 6A(TNRC6A)	VP35|TNRC6A	VP35_NT|TNRC6A	630	157.5	1	200.1	1575	0	ENSG00000090905	trinucleotide repeat containing 6A(TNRC6A)	27327	trinucleotide repeat containing 6A(TNRC6A)
VP35	VP35_NT	XRN1	Q8IZH2	5'-3' exoribonuclease 1(XRN1)	VP35|XRN1	VP35_NT|XRN1	877	219.25	1	7.93	38.13	0	ENSG00000114127	5'-3' exoribonuclease 1(XRN1)	54464	5'-3' exoribonuclease 1(XRN1)
VP35	VP35_NT	YTHDF1	B4DT65	YTH N6-methyladenosine RNA binding protein 1	VP35|YTHDF1	VP35_NT|YTHDF1	53	13.25	1	16.76	132.5	0	ENSG00000149658	YTH N6-methyladenosine RNA binding protein 1(YTHDF1)
VP35	VP35_NT	ZMYM1	Q5SVZ6	zinc finger MYM-type containing 1(ZMYM1)	VP35|ZMYM1	VP35_NT|ZMYM1	193	48.25	1	62.26	482.5	0	ENSG00000197056	zinc finger MYM-type containing 1(ZMYM1)	79830	zinc finger MYM-type containing 1(ZMYM1)
VP40	VP40_CT	GPSM1	A0A0A0MRC4	G-protein signaling modulator 1(GPSM1)	VP40|GPSM1	VP40_CT|GPSM1	91	22.75	0.75	-2.07	227.5	0.01	ENSG00000160360	G-protein signaling modulator 1(GPSM1)	26086	G-protein signaling modulator 1(GPSM1)
VP40	VP40_NT	DSG2	Q14126	desmoglein 2(DSG2)	VP40|DSG2	VP40_NT|DSG2	263	65.75	1	5.68	9.39	0	ENSG00000046604	desmoglein 2(DSG2)	1829	desmoglein 2(DSG2)
VP40	VP40_NT	EPB41	P11171	erythrocyte membrane protein band 4.1(EPB41)	VP40|EPB41	VP40_NT|EPB41	101	25.25	0.98	3.17	15.54	0	ENSG00000159023	erythrocyte membrane protein band 4.1(EPB41)	2035	erythrocyte membrane protein band 4.1(EPB41)
VP40	VP40_NT	LNPEP	B2RAK1	cDNA, FLJ94965, highly similar to Homo sapiens leucyl/cystinyl aminopeptidase (LNPEP), mRNA	VP40|LNPEP	VP40_NT|LNPEP	58	14.5	1	19.48	145	0	ENSG00000113441	leucyl and cystinyl aminopeptidase(LNPEP)
VP40	VP40_NT	MON2	B7ZM73	MON2 homolog, regulator of endosome-to-Golgi trafficking(MON2)	VP40|MON2	VP40_NT|MON2	44	11	1	14.88	110	0	ENSG00000061987	MON2 homolog, regulator of endosome-to-Golgi trafficking(MON2)	23041	MON2 homolog, regulator of endosome-to-Golgi trafficking(MON2)
VP40	VP40_NT	NECTIN2	Q92692	nectin cell adhesion molecule 2(NECTIN2)	VP40|NECTIN2	VP40_NT|NECTIN2	100	25	1	5.12	28.57	0	ENSG00000130202	nectin cell adhesion molecule 2(NECTIN2)	5819	nectin cell adhesion molecule 2(NECTIN2)
VP40	VP40_NT	NOTCH2	Q04721	notch 2(NOTCH2)	VP40|NOTCH2	VP40_NT|NOTCH2	317	79.25	1	71.97	792.5	0	ENSG00000134250	notch 2(NOTCH2)	4853	notch 2(NOTCH2)
VP40	VP40_NT	PDCD11	Q14690	programmed cell death 11(PDCD11)	VP40|PDCD11	VP40_NT|PDCD11	57	14.25	1	21	142.5	0	ENSG00000148843	programmed cell death 11(PDCD11)	22984	programmed cell death 11(PDCD11)
VP40	VP40_NT	PPM1B	O75688	protein phosphatase, Mg2+/Mn2+ dependent 1B(PPM1B)	VP40|PPM1B	VP40_NT|PPM1B	104	26	1	37.3	260	0	ENSG00000138032	protein phosphatase, Mg2+/Mn2+ dependent 1B(PPM1B)	5495	protein phosphatase, Mg2+/Mn2+ dependent 1B(PPM1B)
VP40	VP40_NT	PTPN14	A8K6H6	protein tyrosine phosphatase, non-receptor type 14(PTPN14)	VP40|PTPN14	VP40_NT|PTPN14	45	11.25	1	16.43	112.5	0	ENSG00000152104	protein tyrosine phosphatase, non-receptor type 14(PTPN14)	5784	protein tyrosine phosphatase, non-receptor type 14(PTPN14)
VP40	VP40_NT	RASAL2	Q9UJF2	RAS protein activator like 2(RASAL2)	VP40|RASAL2	VP40_NT|RASAL2	67	16.75	1	17.96	167.5	0	ENSG00000075391	RAS protein activator like 2(RASAL2)	9462	RAS protein activator like 2(RASAL2)
VP40	VP40_NT	SET	A0A024R895	SET nuclear proto-oncogene(SET)	VP40|SET	VP40_NT|SET	29	7.25	0.96	2.49	14.5	0	ENSG00000119335	SET nuclear proto-oncogene(SET)	6418	SET nuclear proto-oncogene(SET)
VP40	VP40_NT	SLC38A2	A0A024R0W3	solute carrier family 38 member 2(SLC38A2)	VP40|SLC38A2	VP40_NT|SLC38A2	15	3.75	1	5.07	37.5	0	ENSG00000134294	solute carrier family 38 member 2(SLC38A2)	54407	solute carrier family 38 member 2(SLC38A2)
VP40	VP40_NT	SMCR8	Q8TEV9	Smith-Magenis syndrome chromosome region, candidate 8(SMCR8)	VP40|SMCR8	VP40_NT|SMCR8	135	33.75	1	46.04	337.5	0	ENSG00000176994	Smith-Magenis syndrome chromosome region, candidate 8(SMCR8)	140775	Smith-Magenis syndrome chromosome region, candidate 8(SMCR8)
VP40	VP40_NT	SORT1	Q99523	sortilin 1(SORT1)	VP40|SORT1	VP40_NT|SORT1	31	7.75	1	10.13	77.5	0	ENSG00000134243	sortilin 1(SORT1)	6272	sortilin 1(SORT1)
VP40	VP40_NT	TBC1D15	Q8TC07	TBC1 domain family member 15(TBC1D15)	VP40|TBC1D15	VP40_NT|TBC1D15	55	13.75	0.97	3.15	12.22	0	ENSG00000121749	TBC1 domain family member 15(TBC1D15)	64786	TBC1 domain family member 15(TBC1D15)
VP40	VP40_NT	UBAP1	A0A0D9SG79	ubiquitin associated protein 1(UBAP1)	VP40|UBAP1	VP40_NT|UBAP1	16	4	1	5.07	40	0	ENSG00000165006	ubiquitin associated protein 1(UBAP1)	51271	ubiquitin associated protein 1(UBAP1)
VP40	VP40_NT	USP6NL	X6RAB3	USP6 N-terminal like(USP6NL)	VP40|USP6NL	VP40_NT|USP6NL	101	25.25	1	35.84	252.5	0	ENSG00000148429	USP6 N-terminal like(USP6NL)	9712	USP6 N-terminal like(USP6NL)
NP	NP_CT	(SEPT9)	Q9UHD8	septin 9(SEPT9)	NP|(SEPT9)	NP_CT|(SEPT9)	46	11.5	1	16.93	115	0			10801	septin 9(SEPT9)
NP	NP_CT	AARS	P49588	alanyl-tRNA synthetase(AARS)	NP|AARS	NP_CT|AARS	56	14	0.83	0.95	4.15	0.01			16	alanyl-tRNA synthetase(AARS)
NP	NP_CT	AARSD1	Q9BTE6	alanyl-tRNA synthetase domain containing 1(AARSD1)	NP|AARSD1	NP_CT|AARSD1	49	12.25	1	13.82	122.5	0			80755	alanyl-tRNA synthetase domain containing 1(AARSD1)
NP	NP_CT	AHNAK	Q09666	AHNAK nucleoprotein(AHNAK)	NP|AHNAK	NP_CT|AHNAK	4425	1106.25	1	9.64	12.94	0			79026	AHNAK nucleoprotein(AHNAK)
NP	NP_CT	AP1G1	A0A140VJE7	adaptor related protein complex 1 gamma 1 subunit(AP1G1)	NP|AP1G1	NP_CT|AP1G1	59	14.75	1	21.5	147.5	0	ENSG00000166747	adaptor related protein complex 1 gamma 1 subunit(AP1G1)	164	adaptor related protein complex 1 gamma 1 subunit(AP1G1)
NP	NP_CT	ARF3	A0A024R0Y6	ADP ribosylation factor 3(ARF3)	NP|ARF3	NP_CT|ARF3	49	12.25	0.96	2.84	7.54	0.01			377	ADP ribosylation factor 3(ARF3)
NP	NP_CT	B3KSV4	B3KSV4	cDNA FLJ37129 fis, clone BRACE2022990	NP|B3KSV4	NP_CT|B3KSV4	126	31.5	1	46.54	315	0
NP	NP_CT	BRCA2	P51587	BRCA2, DNA repair associated(BRCA2)	NP|BRCA2	NP_CT|BRCA2	270	67.5	1	93.91	675	0			675	BRCA2, DNA repair associated(BRCA2)
NP	NP_CT	CC2D1A	Q6P1N0	coiled-coil and C2 domain containing 1A(CC2D1A)	NP|CC2D1A	NP_CT|CC2D1A	209	52.25	0.97	3.2	5.1	0			54862	coiled-coil and C2 domain containing 1A(CC2D1A)
NP	NP_CT	CCDC85C	A6NKD9	coiled-coil domain containing 85C(CCDC85C)	NP|CCDC85C	NP_CT|CCDC85C	55	13.75	0.98	3.48	7.33	0			317762	coiled-coil domain containing 85C(CCDC85C)
NP	NP_CT	CD2AP	Q9Y5K6	CD2 associated protein(CD2AP)	NP|CD2AP	NP_CT|CD2AP	515	128.75	0.98	3.37	5	0			23607	CD2 associated protein(CD2AP)
NP	NP_CT	CEP192	Q8TEP8	centrosomal protein 192(CEP192)	NP|CEP192	NP_CT|CEP192	465	116.25	1	6.38	9.12	0			55125	centrosomal protein 192(CEP192)
NP	NP_CT	CEP55	D3DR37	centrosomal protein 55(CEP55)	NP|CEP55	NP_CT|CEP55	33	8.25	0.93	2.38	6.6	0.01			55165	centrosomal protein 55(CEP55)
NP	NP_CT	CEP85	Q6P2H3	centrosomal protein 85(CEP85)	NP|CEP85	NP_CT|CEP85	73	18.25	1	26	182.5	0			64793	centrosomal protein 85(CEP85)
NP	NP_CT	CGN	B9EK46	cingulin(CGN)	NP|CGN	NP_CT|CGN	794	198.5	1	10.12	22.69	0			57530	cingulin(CGN)
NP	NP_CT	CKAP5	Q14008	cytoskeleton associated protein 5(CKAP5)	NP|CKAP5	NP_CT|CKAP5	344	86	0.98	3.89	6.31	0			9793	cytoskeleton associated protein 5(CKAP5)
NP	NP_CT	CKB	A0A0S2Z471	creatine kinase B(CKB)	NP|CKB	NP_CT|CKB	25	6.25	1	4.62	25	0			1152	creatine kinase B(CKB)
NP	NP_CT	CNOT1	A5YKK6	CCR4-NOT transcription complex subunit 1(CNOT1)	NP|CNOT1	NP_CT|CNOT1	237	59.25	0.99	4.12	7.29	0			23019	CCR4-NOT transcription complex subunit 1(CNOT1)
NP	NP_CT	COPB1	P53618	coatomer protein complex subunit beta 1(COPB1)	NP|COPB1	NP_CT|COPB1	29	7.25	0.92	1.3	8.29	0.01			1315	coatomer protein complex subunit beta 1(COPB1)
NP	NP_CT	CYLD	A0A024R6T1	CYLD lysine 63 deubiquitinase(CYLD)	NP|CYLD	NP_CT|CYLD	141	35.25	1	49.44	352.5	0			1540	CYLD lysine 63 deubiquitinase(CYLD)
NP	NP_CT	DDX39B	A0A024RCM3	DExD-box helicase 39B(DDX39B)	NP|DDX39B	NP_CT|DDX39B	51	12.75	0.96	2.81	8.5	0			7919	DExD-box helicase 39B(DDX39B)
NP	NP_CT	DNM2	P50570	dynamin 2(DNM2)	NP|DNM2	NP_CT|DNM2	86	21.5	0.99	3.8	13.23	0			1785	dynamin 2(DNM2)
NP	NP_CT	DSP	P15924	desmoplakin(DSP)	NP|DSP	NP_CT|DSP	263	65.75	0.89	1.34	4.28	0.01			1832	desmoplakin(DSP)
NP	NP_CT	ELAVL1	Q15717	ELAV like RNA binding protein 1(ELAVL1)	NP|ELAVL1	NP_CT|ELAVL1	33	8.25	0.96	2.86	9.43	0			1994	ELAV like RNA binding protein 1(ELAVL1)
NP	NP_CT	EPS15L1	A0A024R7G6	epidermal growth factor receptor pathway substrate 15 like 1(EPS15L1)	NP|EPS15L1	NP_CT|EPS15L1	61	15.25	1	18.46	152.5	0			58513	epidermal growth factor receptor pathway substrate 15 like 1(EPS15L1)
NP	NP_CT	FXR1	A0A0F7KYT8	FMR1 autosomal homolog 1(FXR1)	NP|FXR1	NP_CT|FXR1	104	26	0.94	2.45	4.73	0.01			8087	FMR1 autosomal homolog 1(FXR1)
NP	NP_CT	HBS1L	Q9Y450	HBS1 like translational GTPase(HBS1L)	NP|HBS1L	NP_CT|HBS1L	67	16.75	0.86	1.29	4.19	0.01			10767	HBS1 like translational GTPase(HBS1L)
NP	NP_CT	HLCS	P50747	holocarboxylase synthetase(HLCS)	NP|HLCS	NP_CT|HLCS	84	21	0.96	2.98	5.79	0			3141	holocarboxylase synthetase(HLCS)
NP	NP_CT	HSPD1	A0A024R3X4	heat shock protein family D (Hsp60) member 1(HSPD1)	NP|HSPD1	NP_CT|HSPD1	59	14.75	0.97	3.23	9.08	0			3329	heat shock protein family D (Hsp60) member 1(HSPD1)
NP	NP_CT	IBTK	B7ZLE0	inhibitor of Bruton tyrosine kinase(IBTK)	NP|IBTK	NP_CT|IBTK	91	22.75	0.96	2.85	6.74	0			25998	inhibitor of Bruton tyrosine kinase(IBTK)
NP	NP_CT	KIAA0430	Q9Y4F3	KIAA0430(KIAA0430)	NP|KIAA0430	NP_CT|KIAA0430	50	12.5	1	18.46	125	0			9665	KIAA0430(KIAA0430)
NP	NP_CT	KIAA1191	A0A024R7Q7	KIAA1191(KIAA1191)	NP|KIAA1191	NP_CT|KIAA1191	38	9.5	1	8.99	95	0			57179	KIAA1191(KIAA1191)
NP	NP_CT	KIAA1462	Q9P266	KIAA1462(KIAA1462)	NP|KIAA1462	NP_CT|KIAA1462	105	26.25	1	28.97	262.5	0			57608	KIAA1462(KIAA1462)
NP	NP_CT	KIAA1671	Q9BY89	KIAA1671(KIAA1671)	NP|KIAA1671	NP_CT|KIAA1671	1142	285.5	1	11.83	18.57	0			85379	KIAA1671(KIAA1671)
NP	NP_CT	KIF14	Q15058	kinesin family member 14(KIF14)	NP|KIF14	NP_CT|KIF14	1204	301	1	10.33	22.09	0			9928	kinesin family member 14(KIF14)
NP	NP_CT	LASP1	A0A024R1S8	LIM and SH3 protein 1(LASP1)	NP|LASP1	NP_CT|LASP1	31	7.75	0.96	3.1	10.33	0			3927	LIM and SH3 protein 1(LASP1)
NP	NP_CT	LATS1	O95835	large tumor suppressor kinase 1(LATS1)	NP|LATS1	NP_CT|LATS1	65	16.25	1	19.98	162.5	0			9113	large tumor suppressor kinase 1(LATS1)
NP	NP_CT	LRIF1	Q5T3J3	ligand dependent nuclear receptor interacting factor 1(LRIF1)	NP|LRIF1	NP_CT|LRIF1	54	13.5	0.99	3.96	18	0			55791	ligand dependent nuclear receptor interacting factor 1(LRIF1)
NP	NP_CT	MAP3K7	Q5U0D0	Mitogen-activated protein kinase kinase kinase 7	NP|MAP3K7	NP_CT|MAP3K7	112	28	1	39.26	280	0
NP	NP_CT	MPHOSPH9	Q99550	M-phase phosphoprotein 9(MPHOSPH9)	NP|MPHOSPH9	NP_CT|MPHOSPH9	258	64.5	1	83.92	645	0	ENSG00000051825	M-phase phosphoprotein 9(MPHOSPH9)	10198	M-phase phosphoprotein 9(MPHOSPH9)
NP	NP_CT	MTMR6	Q9Y217	myotubularin related protein 6(MTMR6)	NP|MTMR6	NP_CT|MTMR6	32	8	0.93	2.01	8	0.01			9107	myotubularin related protein 6(MTMR6)
NP	NP_CT	NBN	A6H8Y5	nibrin(NBN)	NP|NBN	NP_CT|NBN	196	49	0.98	3.82	9.8	0			4683	nibrin(NBN)
NP	NP_CT	NCOA6	F6M2K3	nuclear receptor coactivator 6(NCOA6)	NP|NCOA6	NP_CT|NCOA6	165	41.25	1	49.44	412.5	0			23054	nuclear receptor coactivator 6(NCOA6)
NP	NP_CT	NFX1	Q12986	nuclear transcription factor, X-box binding 1(NFX1)	NP|NFX1	NP_CT|NFX1	48	12	1	18.46	120	0			4799	nuclear transcription factor, X-box binding 1(NFX1)
NP	NP_CT	OCRL	Q504W7	OCRL, inositol polyphosphate-5-phosphatase(OCRL)	NP|OCRL	NP_CT|OCRL	79	19.75	0.95	2.65	6.08	0.01			4952	OCRL, inositol polyphosphate-5-phosphatase(OCRL)
NP	NP_CT	PALLD	Q8WX93	palladin, cytoskeletal associated protein(PALLD)	NP|PALLD	NP_CT|PALLD	205	51.25	0.88	0.88	4.27	0.01			23022	palladin, cytoskeletal associated protein(PALLD)
NP	NP_CT	PRRC2B	Q5JSZ5	proline rich coiled-coil 2B(PRRC2B)	NP|PRRC2B	NP_CT|PRRC2B	62	15.5	0.91	2.08	4.59	0.01			84726	proline rich coiled-coil 2B(PRRC2B)
NP	NP_CT	Q59FI9	Q59FI9	60S ribosomal protein L12	NP|Q59FI9	NP_CT|Q59FI9	13	3.25	0.99	3.73	32.5	0
NP	NP_CT	RACK1	E9KL35	receptor for activated C kinase 1(RACK1)	NP|RACK1	NP_CT|RACK1	50	12.5	1	16.93	125	0			10399	receptor for activated C kinase 1(RACK1)
NP	NP_CT	RNF219	Q5W0B1	ring finger protein 219(RNF219)	NP|RNF219	NP_CT|RNF219	273	68.25	0.99	3.86	5.93	0			79596	ring finger protein 219(RNF219)
NP	NP_CT	RPL13	Q6NZ55	ribosomal protein L13(RPL13)	NP|RPL13	NP_CT|RPL13	22	5.5	1	8.99	55	0			6137	ribosomal protein L13(RPL13)
NP	NP_CT	RPL13A	M0QYS1	ribosomal protein L13a(RPL13A)	NP|RPL13A	NP_CT|RPL13A	38	9.5	1	15.38	95	0			23521	ribosomal protein L13a(RPL13A)
NP	NP_CT	RPL18A	M0R3D6	ribosomal protein L18a(RPL18A)	NP|RPL18A	NP_CT|RPL18A	21	5.25	1	5.57	52.5	0			6142	ribosomal protein L18a(RPL18A)
NP	NP_CT	RPL23	A0A024R1Q8	ribosomal protein L23(RPL23)	NP|RPL23	NP_CT|RPL23	34	8.5	0.99	4.08	22.67	0			9349	ribosomal protein L23(RPL23)
NP	NP_CT	RPL4	B4DMJ6	60S ribosomal protein L4	NP|RPL4	NP_CT|RPL4	39	9.75	1	10.63	97.5	0
NP	NP_CT	RPL6	A0A024RBK3	ribosomal protein L6(RPL6)	NP|RPL6	NP_CT|RPL6	82	20.5	1	5.12	27.33	0			6128	ribosomal protein L6(RPL6)
NP	NP_CT	RPL9	H0Y9V9	ribosomal protein L9(RPL9)	NP|RPL9	NP_CT|RPL9	20	5	1	7.31	50	0			6133	ribosomal protein L9(RPL9)
NP	NP_CT	RPS11	P62280	ribosomal protein S11(RPS11)	NP|RPS11	NP_CT|RPS11	71	17.75	0.99	4.8	12.91	0			6205	ribosomal protein S11(RPS11)
NP	NP_CT	RPS15A	B2R4W8	ribosomal protein S15a(RPS15A)	NP|RPS15A	NP_CT|RPS15A	54	13.5	0.97	3.26	9	0			6210	ribosomal protein S15a(RPS15A)
NP	NP_CT	RPS6	A2A3R6	ribosomal protein S6(RPS6)	NP|RPS6	NP_CT|RPS6	34	8.5	0.91	1.93	5.67	0.01			6194	ribosomal protein S6(RPS6)
NP	NP_CT	RPS8	Q5JR94	ribosomal protein S8(RPS8)	NP|RPS8	NP_CT|RPS8	37	9.25	0.99	3.81	12.33	0			6202	ribosomal protein S8(RPS8)
NP	NP_CT	SCYL2	A0A0U1RQQ9	SCY1 like pseudokinase 2(SCYL2)	NP|SCYL2	NP_CT|SCYL2	37	9.25	0.98	3.36	14.8	0			55681	SCY1 like pseudokinase 2(SCYL2)
NP	NP_CT	SIPA1L3	B2RWP0	signal induced proliferation associated 1 like 3(SIPA1L3)	NP|SIPA1L3	NP_CT|SIPA1L3	190	47.5	1	65.3	475	0			23094	signal induced proliferation associated 1 like 3(SIPA1L3)
NP	NP_CT	SKA3	Q8IX90	spindle and kinetochore associated complex subunit 3(SKA3)	NP|SKA3	NP_CT|SKA3	209	52.25	1	4.81	8.53	0			221150	spindle and kinetochore associated complex subunit 3(SKA3)
NP	NP_CT	SMAP1	B2RDK5	cDNA, FLJ96655, highly similar to Homo sapiens stromal membrane-associated protein 1 (SMAP1), mRNA	NP|SMAP1	NP_CT|SMAP1	24	6	0.87	1.11	5.33	0.01
NP	NP_CT	SMG7	Q92540	SMG7, nonsense mediated mRNA decay factor(SMG7)	NP|SMG7	NP_CT|SMG7	82	20.5	0.98	3.95	11.71	0	ENSG00000116698	SMG7, nonsense mediated mRNA decay factor(SMG7)	9887	SMG7, nonsense mediated mRNA decay factor(SMG7)
NP	NP_CT	SMG9	A0A024R0Q0	SMG9, nonsense mediated mRNA decay factor(SMG9)	NP|SMG9	NP_CT|SMG9	36	9	0.83	1.25	4	0.01			56006	SMG9, nonsense mediated mRNA decay factor(SMG9)
NP	NP_CT	SND1	A0A140VK49	staphylococcal nuclease and tudor domain containing 1(SND1)	NP|SND1	NP_CT|SND1	84	21	1	24.5	210	0	ENSG00000197157	staphylococcal nuclease and tudor domain containing 1(SND1)	27044	staphylococcal nuclease and tudor domain containing 1(SND1)
NP	NP_CT	SUMO1	B8ZZN6	small ubiquitin-like modifier 1(SUMO1)	NP|SUMO1	NP_CT|SUMO1	14	3.5	1	5.57	35	0			7341	small ubiquitin-like modifier 1(SUMO1)
NP	NP_CT	TAB1	A8K6K3	TGF-beta activated kinase 1 (MAP3K7) binding protein 1(TAB1)	NP|TAB1	NP_CT|TAB1	69	17.25	1	23	172.5	0			10454	TGF-beta activated kinase 1 (MAP3K7) binding protein 1(TAB1)
NP	NP_CT	TAB2	Q9NYJ8	TGF-beta activated kinase 1/MAP3K7 binding protein 2(TAB2)	NP|TAB2	NP_CT|TAB2	175	43.75	1	6.06	26.92	0			23118	TGF-beta activated kinase 1/MAP3K7 binding protein 2(TAB2)
NP	NP_CT	TJP1	G5E9E7	tight junction protein 1(TJP1)	NP|TJP1	NP_CT|TJP1	1294	323.5	1	7.24	13.01	0			7082	tight junction protein 1(TJP1)
NP	NP_CT	TJP2	A0A024R233	tight junction protein 2(TJP2)	NP|TJP2	NP_CT|TJP2	366	91.5	0.99	4.14	8.82	0			9414	tight junction protein 2(TJP2)
NP	NP_CT	TMEM263	Q8WUH6	transmembrane protein 263(TMEM263)	NP|TMEM263	NP_CT|TMEM263	37	9.25	1	13.82	92.5	0			90488	transmembrane protein 263(TMEM263)
NP	NP_CT	TNFRSF1B	Q8IVS6	TNF receptor superfamily member 1B(TNFRSF1B)	NP|TNFRSF1B	NP_CT|TNFRSF1B	21	5.25	0.92	1.99	7	0.01			7133	TNF receptor superfamily member 1B(TNFRSF1B)
NP	NP_CT	TNRC6B	Q9UPQ9	trinucleotide repeat containing 6B(TNRC6B)	NP|TNRC6B	NP_CT|TNRC6B	280	70	1	83.92	700	0			23112	trinucleotide repeat containing 6B(TNRC6B)
NP	NP_CT	TNRC6C	A0A1B0GU24	trinucleotide repeat containing 6C(TNRC6C)	NP|TNRC6C	NP_CT|TNRC6C	126	31.5	1	46.54	315	0			57690	trinucleotide repeat containing 6C(TNRC6C)
NP	NP_CT	TRIP6	Q15654	thyroid hormone receptor interactor 6(TRIP6)	NP|TRIP6	NP_CT|TRIP6	24	6	1	5.57	60	0			7205	thyroid hormone receptor interactor 6(TRIP6)
NP	NP_CT	TTK	P33981	TTK protein kinase(TTK)	NP|TTK	NP_CT|TTK	137	34.25	1	6.74	39.14	0			7272	TTK protein kinase(TTK)
NP	NP_CT	TUFM	P49411	Tu translation elongation factor, mitochondrial(TUFM)	NP|TUFM	NP_CT|TUFM	68	17	0.97	3.12	6.48	0			7284	Tu translation elongation factor, mitochondrial(TUFM)
NP	NP_CT	TXLNG	Q9NUQ3	taxilin gamma(TXLNG)	NP|TXLNG	NP_CT|TXLNG	31	7.75	1	10.63	77.5	0			55787	taxilin gamma(TXLNG)
NP	NP_CT	UBAP2	Q5T6F2	ubiquitin associated protein 2(UBAP2)	NP|UBAP2	NP_CT|UBAP2	89	22.25	1	5.27	25.43	0			55833	ubiquitin associated protein 2(UBAP2)
NP	NP_CT	USP54	Q70EL1	ubiquitin specific peptidase 54(USP54)	NP|USP54	NP_CT|USP54	52	13	1	19.98	130	0			159195	ubiquitin specific peptidase 54(USP54)
NP	NP_CT	VARS	A0A140T936	valyl-tRNA synthetase(VARS)	NP|VARS	NP_CT|VARS	50	12.5	0.82	0.56	3.57	0.01			7407	valyl-tRNA synthetase(VARS)
NP	NP_CT	WDCP	Q9H6R7	WD repeat and coiled coil containing(WDCP)	NP|WDCP	NP_CT|WDCP	227	56.75	1	7.34	11.07	0			80304	WD repeat and coiled coil containing(WDCP)
NP	NP_CT	YTHDC2	Q9H6S0	YTH domain containing 2(YTHDC2)	NP|YTHDC2	NP_CT|YTHDC2	55	13.75	0.95	2.45	6.88	0.01			64848	YTH domain containing 2(YTHDC2)
NP	NP_CT	ZMYM1	B4DSJ9	zinc finger MYM-type containing 1(ZMYM1)	NP|ZMYM1	NP_CT|ZMYM1	93	23.25	0.95	2.73	6	0.01	ENSG00000197056	zinc finger MYM-type containing 1(ZMYM1)	79830	zinc finger MYM-type containing 1(ZMYM1)
NP	NP_CT	ZNF507	Q8TCN5	zinc finger protein 507(ZNF507)	NP|ZNF507	NP_CT|ZNF507	68	17	1	23	170	0	ENSG00000168813	zinc finger protein 507(ZNF507)	22847	zinc finger protein 507(ZNF507)
NP	NP_NT	ABI2	A0A0C4DG21	abl interactor 2(ABI2)	NP|ABI2	NP_NT|ABI2	25	6.25	1	7.13	62.5	0			10152	abl interactor 2(ABI2)
NP	NP_NT	ACOT7	O00154	acyl-CoA thioesterase 7(ACOT7)	NP|ACOT7	NP_NT|ACOT7	69	17.25	1	22.82	172.5	0			11332	acyl-CoA thioesterase 7(ACOT7)
NP	NP_NT	ARF3	A0A024R0Y6	ADP ribosylation factor 3(ARF3)	NP|ARF3	NP_NT|ARF3	58	14.5	0.96	2.42	8.92	0			377	ADP ribosylation factor 3(ARF3)
NP	NP_NT	B3KM97	B3KM97	Very-long-chain enoyl-CoA reductase	NP|B3KM97	NP_NT|B3KM97	17	4.25	1	5.39	42.5	0
NP	NP_NT	BCCIP	Q9P287	BRCA2 and CDKN1A interacting protein(BCCIP)	NP|BCCIP	NP_NT|BCCIP	76	19	1	25.82	190	0	ENSG00000107949	BRCA2 and CDKN1A interacting protein(BCCIP)	56647	BRCA2 and CDKN1A interacting protein(BCCIP)
NP	NP_NT	BRCA2	P51587	BRCA2, DNA repair associated(BRCA2)	NP|BRCA2	NP_NT|BRCA2	131	32.75	1	43.45	327.5	0			675	BRCA2, DNA repair associated(BRCA2)
NP	NP_NT	BTF3	P20290	basic transcription factor 3(BTF3)	NP|BTF3	NP_NT|BTF3	16	4	0.92	1.05	10.67	0.01			689	basic transcription factor 3(BTF3)
NP	NP_NT	CAPZB	B2R7T8	F-actin-capping protein subunit beta	NP|CAPZB	NP_NT|CAPZB	31	7.75	1	5.94	31	0
NP	NP_NT	CC2D1A	Q6P1N0	coiled-coil and C2 domain containing 1A(CC2D1A)	NP|CC2D1A	NP_NT|CC2D1A	220	55	0.98	3.26	5.37	0			54862	coiled-coil and C2 domain containing 1A(CC2D1A)
NP	NP_NT	CEP55	D3DR37	centrosomal protein 55(CEP55)	NP|CEP55	NP_NT|CEP55	47	11.75	0.96	3.09	9.4	0			55165	centrosomal protein 55(CEP55)
NP	NP_NT	CGNL1	Q0VF96	cingulin like 1(CGNL1)	NP|CGNL1	NP_NT|CGNL1	120	30	1	40.54	300	0	ENSG00000128849	cingulin like 1(CGNL1)	84952	cingulin like 1(CGNL1)
NP	NP_NT	CLTC	A0A087WVQ6	clathrin heavy chain(CLTC)	NP|CLTC	NP_NT|CLTC	69	17.25	1	22.82	172.5	0			1213	clathrin heavy chain(CLTC)
NP	NP_NT	DDX39B	A0A024RCM3	DExD-box helicase 39B(DDX39B)	NP|DDX39B	NP_NT|DDX39B	68	17	0.99	4.11	11.33	0			7919	DExD-box helicase 39B(DDX39B)
NP	NP_NT	FLNA	Q5HY54	filamin A(FLNA)	NP|FLNA	NP_NT|FLNA	263	65.75	1	95.16	657.5	0			2316	filamin A(FLNA)
NP	NP_NT	GEN1	Q17RS7	GEN1, Holliday junction 5' flap endonuclease(GEN1)	NP|GEN1	NP_NT|GEN1	51	12.75	1	16.74	127.5	0	ENSG00000178295	GEN1, Holliday junction 5' flap endonuclease(GEN1)	348654	GEN1, Holliday junction 5' flap endonuclease(GEN1)
NP	NP_NT	HACD3	Q9P035	3-hydroxyacyl-CoA dehydratase 3(HACD3)	NP|HACD3	NP_NT|HACD3	41	10.25	0.93	2.21	7.45	0.01			51495	3-hydroxyacyl-CoA dehydratase 3(HACD3)
NP	NP_NT	HLCS	P50747	holocarboxylase synthetase(HLCS)	NP|HLCS	NP_NT|HLCS	71	17.75	0.92	1.91	4.9	0.01			3141	holocarboxylase synthetase(HLCS)
NP	NP_NT	HNRNPU	B3KX72	cDNA FLJ44920 fis, clone BRAMY3011501, highly similar to Heterogeneous nuclear ribonucleoprotein U	NP|HNRNPU	NP_NT|HNRNPU	40	10	1	7.13	100	0
NP	NP_NT	HNRPAB	B4DMY3	cDNA FLJ60713, highly similar to Homo sapiens heterogeneous nuclear ribonucleoprotein A/B (HNRPAB), transcript variant 1, mRNA	NP|HNRPAB	NP_NT|HNRPAB	37	9.25	0.97	3.51	12.33	0
NP	NP_NT	HSPD1	A0A024R3X4	heat shock protein family D (Hsp60) member 1(HSPD1)	NP|HSPD1	NP_NT|HSPD1	99	24.75	0.99	3.88	15.23	0			3329	heat shock protein family D (Hsp60) member 1(HSPD1)
NP	NP_NT	KIAA1462	Q9P266	KIAA1462(KIAA1462)	NP|KIAA1462	NP_NT|KIAA1462	22	5.5	1	7.13	55	0			57608	KIAA1462(KIAA1462)
NP	NP_NT	KIAA1671	Q9BY89	KIAA1671(KIAA1671)	NP|KIAA1671	NP_NT|KIAA1671	278	69.5	0.94	2.16	4.52	0.01			85379	KIAA1671(KIAA1671)
NP	NP_NT	LPP	A0A087WZF1	LIM domain containing preferred translocation partner in lipoma(LPP)	NP|LPP	NP_NT|LPP	133	33.25	0.98	3.51	7.82	0			4026	LIM domain containing preferred translocation partner in lipoma(LPP)
NP	NP_NT	LUZP1	A0A024RAC0	leucine zipper protein 1(LUZP1)	NP|LUZP1	NP_NT|LUZP1	276	69	0.99	4.69	12	0	ENSG00000169641	leucine zipper protein 1(LUZP1)	7798	leucine zipper protein 1(LUZP1)
NP	NP_NT	MAP7D3	Q8IWC1	MAP7 domain containing 3(MAP7D3)	NP|MAP7D3	NP_NT|MAP7D3	105	26.25	1	28.79	262.5	0	ENSG00000129680	MAP7 domain containing 3(MAP7D3)	79649	MAP7 domain containing 3(MAP7D3)
NP	NP_NT	MIF	I4AY87	macrophage migration inhibitory factor (glycosylation-inhibiting factor)(MIF)	NP|MIF	NP_NT|MIF	15	3.75	1	5.39	37.5	0			4282	macrophage migration inhibitory factor (glycosylation-inhibiting factor)(MIF)
NP	NP_NT	PCMT1	A0A0A0MRJ6	protein-L-isoaspartate (D-aspartate) O-methyltransferase(PCMT1)	NP|PCMT1	NP_NT|PCMT1	77	19.25	0.91	1.61	4.28	0.01			5110	protein-L-isoaspartate (D-aspartate) O-methyltransferase(PCMT1)
NP	NP_NT	POC5	D6RDG4	POC5 centriolar protein(POC5)	NP|POC5	NP_NT|POC5	13	3.25	1	5.39	32.5	0	ENSG00000152359	POC5 centriolar protein(POC5)
NP	NP_NT	PPP1R2P3	G1AUC5	protein phosphatase 1 regulatory inhibitor subunit 2 pseudogene 3(PPP1R2P3)	NP|PPP1R2P3	NP_NT|PPP1R2P3	15	3.75	0.89	1.33	10	0.01			153743	protein phosphatase 1 regulatory inhibitor subunit 2 pseudogene 3(PPP1R2P3)
NP	NP_NT	RACK1	E9KL35	receptor for activated C kinase 1(RACK1)	NP|RACK1	NP_NT|RACK1	90	22.5	1	27.3	225	0			10399	receptor for activated C kinase 1(RACK1)
NP	NP_NT	RPL13A	M0QYS1	ribosomal protein L13a(RPL13A)	NP|RPL13A	NP_NT|RPL13A	47	11.75	1	15.2	117.5	0			23521	ribosomal protein L13a(RPL13A)
NP	NP_NT	RPL23	A0A024R1Q8	ribosomal protein L23(RPL23)	NP|RPL23	NP_NT|RPL23	40	10	1	4.87	26.67	0			9349	ribosomal protein L23(RPL23)
NP	NP_NT	RPL5	A2RUM7	ribosomal protein L5(RPL5)	NP|RPL5	NP_NT|RPL5	55	13.75	1	19.8	137.5	0			6125	ribosomal protein L5(RPL5)
NP	NP_NT	RPL6	A0A024RBK3	ribosomal protein L6(RPL6)	NP|RPL6	NP_NT|RPL6	77	19.25	1	5.36	25.67	0			6128	ribosomal protein L6(RPL6)
NP	NP_NT	RPL7A	P62424	ribosomal protein L7a(RPL7A)	NP|RPL7A	NP_NT|RPL7A	36	9	1	8.81	90	0			6130	ribosomal protein L7a(RPL7A)
NP	NP_NT	RPS11	P62280	ribosomal protein S11(RPS11)	NP|RPS11	NP_NT|RPS11	72	18	0.99	4.62	13.09	0			6205	ribosomal protein S11(RPS11)
NP	NP_NT	RPS15A	B2R4W8	ribosomal protein S15a(RPS15A)	NP|RPS15A	NP_NT|RPS15A	60	15	0.98	3.3	10	0			6210	ribosomal protein S15a(RPS15A)
NP	NP_NT	RPS23	A8K517	ribosomal protein S23(RPS23)	NP|RPS23	NP_NT|RPS23	36	9	0.94	1.96	5.54	0.01			6228	ribosomal protein S23(RPS23)
NP	NP_NT	RPS27A	B2RDW1	ribosomal protein S27a(RPS27A)	NP|RPS27A	NP_NT|RPS27A	108	27	0.97	3.2	7.71	0			6233	ribosomal protein S27a(RPS27A)
NP	NP_NT	RPS4X	B2R491	ribosomal protein S4, X-linked(RPS4X)	NP|RPS4X	NP_NT|RPS4X	31	7.75	1	10.45	77.5	0			6191	ribosomal protein S4, X-linked(RPS4X)
NP	NP_NT	RPS6	A2A3R6	ribosomal protein S6(RPS6)	NP|RPS6	NP_NT|RPS6	43	10.75	0.94	2.34	7.17	0.01			6194	ribosomal protein S6(RPS6)
NP	NP_NT	SKA1	A0A024R294	spindle and kinetochore associated complex subunit 1(SKA1)	NP|SKA1	NP_NT|SKA1	29	7.25	1	8.81	72.5	0	ENSG00000154839	spindle and kinetochore associated complex subunit 1(SKA1)	220134	spindle and kinetochore associated complex subunit 1(SKA1)
NP	NP_NT	SKA3	Q8IX90	spindle and kinetochore associated complex subunit 3(SKA3)	NP|SKA3	NP_NT|SKA3	185	46.25	0.99	4.39	7.55	0			221150	spindle and kinetochore associated complex subunit 3(SKA3)
NP	NP_NT	SNAP29	O95721	synaptosome associated protein 29(SNAP29)	NP|SNAP29	NP_NT|SNAP29	70	17.5	1	5.26	11.67	0			9342	synaptosome associated protein 29(SNAP29)
NP	NP_NT	TAB1	A8K6K3	TGF-beta activated kinase 1 (MAP3K7) binding protein 1(TAB1)	NP|TAB1	NP_NT|TAB1	62	15.5	1	18.28	155	0			10454	TGF-beta activated kinase 1 (MAP3K7) binding protein 1(TAB1)
NP	NP_NT	TAB2	Q9NYJ8	TGF-beta activated kinase 1/MAP3K7 binding protein 2(TAB2)	NP|TAB2	NP_NT|TAB2	124	31	0.99	4.87	19.08	0			23118	TGF-beta activated kinase 1/MAP3K7 binding protein 2(TAB2)
NP	NP_NT	TANC1	Q9C0D5	tetratricopeptide repeat, ankyrin repeat and coiled-coil containing 1(TANC1)	NP|TANC1	NP_NT|TANC1	205	51.25	1	6.47	29.29	0	ENSG00000115183	tetratricopeptide repeat, ankyrin repeat and coiled-coil containing 1(TANC1)	85461	tetratricopeptide repeat, ankyrin repeat and coiled-coil containing 1(TANC1)
NP	NP_NT	TMEM263	Q8WUH6	transmembrane protein 263(TMEM263)	NP|TMEM263	NP_NT|TMEM263	35	8.75	1	10.45	87.5	0			90488	transmembrane protein 263(TMEM263)
NP	NP_NT	TRPS1	Q9UHF7	transcriptional repressor GATA binding 1(TRPS1)	NP|TRPS1	NP_NT|TRPS1	107	26.75	1	36.15	267.5	0			7227	transcriptional repressor GATA binding 1(TRPS1)
NP	NP_NT	TTF2	A0A024R0F1	transcription termination factor 2(TTF2)	NP|TTF2	NP_NT|TTF2	234	58.5	0.97	3.24	5.51	0	ENSG00000116830	transcription termination factor 2(TTF2)	8458	transcription termination factor 2(TTF2)
NP	NP_NT	TTK	P33981	TTK protein kinase(TTK)	NP|TTK	NP_NT|TTK	56	14	0.99	3.7	16	0			7272	TTK protein kinase(TTK)
NP	NP_NT	TUFM	P49411	Tu translation elongation factor, mitochondrial(TUFM)	NP|TUFM	NP_NT|TUFM	65	16.25	0.97	2.62	6.19	0			7284	Tu translation elongation factor, mitochondrial(TUFM)
NP	NP_NT	UPF1	A0A024R7L5	UPF1, RNA helicase and ATPase(UPF1)	NP|UPF1	NP_NT|UPF1	26	6.5	0.9	1.83	6.5	0.01			5976	UPF1, RNA helicase and ATPase(UPF1)
NP	NP_NT	VDAC3	Q9Y277	voltage dependent anion channel 3(VDAC3)	NP|VDAC3	NP_NT|VDAC3	33	8.25	1	8.81	82.5	0			7419	voltage dependent anion channel 3(VDAC3)
VP24	VP24_CT	CSE1L	P55060	chromosome segregation 1 like(CSE1L)	VP24|CSE1L	VP24_CT|CSE1L	876	219	1	6.46	10.19	0	ENSG00000124207	chromosome segregation 1 like(CSE1L)	1434	chromosome segregation 1 like(CSE1L)
VP24	VP24_CT	EIF5A	I3L397	eukaryotic translation initiation factor 5A(EIF5A)	VP24|EIF5A	VP24_CT|EIF5A	44	11	1	16.27	110	0			1984	eukaryotic translation initiation factor 5A(EIF5A)
VP24	VP24_CT	MCM3AP	O60318	minichromosome maintenance complex component 3 associated protein(MCM3AP)	VP24|MCM3AP	VP24_CT|MCM3AP	218	54.5	1	70.39	545	0	ENSG00000160294	minichromosome maintenance complex component 3 associated protein(MCM3AP)	8888	minichromosome maintenance complex component 3 associated protein(MCM3AP)
VP24	VP24_CT	NUP214	A0A024R8B6	nucleoporin 214(NUP214)	VP24|NUP214	VP24_CT|NUP214	448	112	0.96	3.03	5.71	0			8021	nucleoporin 214(NUP214)
VP24	VP24_CT	PIAS1	O75925	protein inhibitor of activated STAT 1(PIAS1)	VP24|PIAS1	VP24_CT|PIAS1	46	11.5	1	13.16	115	0			8554	protein inhibitor of activated STAT 1(PIAS1)
VP24	VP24_CT	PRMT7	A0A024R6Z2	protein arginine methyltransferase 7(PRMT7)	VP24|PRMT7	VP24_CT|PRMT7	54	13.5	1	17.81	135	0			54496	protein arginine methyltransferase 7(PRMT7)
VP24	VP24_CT	RPS11	P62280	ribosomal protein S11(RPS11)	VP24|RPS11	VP24_CT|RPS11	39	9.75	0.9	1.42	7.09	0.01			6205	ribosomal protein S11(RPS11)
VP24	VP24_CT	TCERG1	O14776	transcription elongation regulator 1(TCERG1)	VP24|TCERG1	VP24_CT|TCERG1	276	69	0.94	2.22	4.84	0.01			10915	transcription elongation regulator 1(TCERG1)
VP24	VP24_CT	TMEM263	Q8WUH6	transmembrane protein 263(TMEM263)	VP24|TMEM263	VP24_CT|TMEM263	67	16.75	1	23.85	167.5	0			90488	transmembrane protein 263(TMEM263)
VP24	VP24_CT	XRCC6	A0A024R1N4	X-ray repair cross complementing 6(XRCC6)	VP24|XRCC6	VP24_CT|XRCC6	82	20.5	0.92	2	6.31	0.01			2547	X-ray repair cross complementing 6(XRCC6)
VP24	VP24_NT	ACOT7	O00154	acyl-CoA thioesterase 7(ACOT7)	VP24|ACOT7	VP24_NT|ACOT7	42	10.5	1	14.97	105	0			11332	acyl-CoA thioesterase 7(ACOT7)
VP24	VP24_NT	AGO2	A4FVC0	argonaute 2, RISC catalytic component(AGO2)	VP24|AGO2	VP24_NT|AGO2	51	12.75	1	19.57	127.5	0			27161	argonaute 2, RISC catalytic component(AGO2)
VP24	VP24_NT	BTF3	P20290	basic transcription factor 3(BTF3)	VP24|BTF3	VP24_NT|BTF3	26	6.5	1	4.33	17.33	0			689	basic transcription factor 3(BTF3)
VP24	VP24_NT	CACUL1	Q86Y37	CDK2 associated cullin domain 1(CACUL1)	VP24|CACUL1	VP24_NT|CACUL1	29	7.25	1	8.59	72.5	0	ENSG00000151893	CDK2 associated cullin domain 1(CACUL1)	143384	CDK2 associated cullin domain 1(CACUL1)
VP24	VP24_NT	CNOT1	A5YKK6	CCR4-NOT transcription complex subunit 1(CNOT1)	VP24|CNOT1	VP24_NT|CNOT1	160	40	0.92	1.89	4.92	0.01			23019	CCR4-NOT transcription complex subunit 1(CNOT1)
VP24	VP24_NT	DDX39B	A0A024RCM3	DExD-box helicase 39B(DDX39B)	VP24|DDX39B	VP24_NT|DDX39B	63	15.75	0.98	3.17	10.5	0			7919	DExD-box helicase 39B(DDX39B)
VP24	VP24_NT	EIF5A	I3L397	eukaryotic translation initiation factor 5A(EIF5A)	VP24|EIF5A	VP24_NT|EIF5A	67	16.75	1	21.09	167.5	0			1984	eukaryotic translation initiation factor 5A(EIF5A)
VP24	VP24_NT	ESYT1	A0A024RB16	extended synaptotagmin 1(ESYT1)	VP24|ESYT1	VP24_NT|ESYT1	209	52.25	0.94	2.68	4.98	0.01			23344	extended synaptotagmin 1(ESYT1)
VP24	VP24_NT	F4ZW65	F4ZW65	NF90b	VP24|F4ZW65	VP24_NT|F4ZW65	131	32.75	0.95	2.79	5.95	0.01
VP24	VP24_NT	IGF2BP2	F8W930	insulin like growth factor 2 mRNA binding protein 2(IGF2BP2)	VP24|IGF2BP2	VP24_NT|IGF2BP2	63	15.75	0.95	2.27	7.88	0.01	ENSG00000073792	insulin like growth factor 2 mRNA binding protein 2(IGF2BP2)	10644	insulin like growth factor 2 mRNA binding protein 2(IGF2BP2)
VP24	VP24_NT	KPNA6	B4DWX3	Importin subunit alpha-7	VP24|KPNA6	VP24_NT|KPNA6	195	48.75	1	60.58	487.5	0	ENSG00000025800	karyopherin subunit alpha 6(KPNA6)
VP24	VP24_NT	LTV1	Q96GA3	LTV1 ribosome biogenesis factor(LTV1)	VP24|LTV1	VP24_NT|LTV1	31	7.75	1	8.59	77.5	0			84946	LTV1 ribosome biogenesis factor(LTV1)
VP24	VP24_NT	MAP7D3	Q8IWC1	MAP7 domain containing 3(MAP7D3)	VP24|MAP7D3	VP24_NT|MAP7D3	83	20.75	1	22.6	207.5	0	ENSG00000129680	MAP7 domain containing 3(MAP7D3)	79649	MAP7 domain containing 3(MAP7D3)
VP24	VP24_NT	NUP214	A0A024R8B6	nucleoporin 214(NUP214)	VP24|NUP214	VP24_NT|NUP214	593	148.25	0.98	4.06	7.55	0			8021	nucleoporin 214(NUP214)
VP24	VP24_NT	NUP62	A0A024QZF1	nucleoporin 62(NUP62)	VP24|NUP62	VP24_NT|NUP62	53	13.25	0.97	2.56	8.15	0	ENSG00000213024	nucleoporin 62(NUP62)	23636	nucleoporin 62(NUP62)
VP24	VP24_NT	PABPC1	A0A024R9C1	poly(A) binding protein cytoplasmic 1(PABPC1)	VP24|PABPC1	VP24_NT|PABPC1	61	15.25	0.97	3.24	13.56	0			26986	poly(A) binding protein cytoplasmic 1(PABPC1)
VP24	VP24_NT	PIAS1	O75925	protein inhibitor of activated STAT 1(PIAS1)	VP24|PIAS1	VP24_NT|PIAS1	46	11.5	1	11.83	115	0			8554	protein inhibitor of activated STAT 1(PIAS1)
VP24	VP24_NT	POLR3C	A0A024R4C1	RNA polymerase III subunit C(POLR3C)	VP24|POLR3C	VP24_NT|POLR3C	63	15.75	1	18.05	157.5	0	ENSG00000186141	RNA polymerase III subunit C(POLR3C)	10623	RNA polymerase III subunit C(POLR3C)
VP24	VP24_NT	POM121C	A0A075B7F8	POM121 transmembrane nucleoporin C(POM121C)	VP24|POM121C	VP24_NT|POM121C	152	38	1	47.58	380	0	ENSG00000272391	POM121 transmembrane nucleoporin C(POM121C)	100101267	POM121 transmembrane nucleoporin C(POM121C)
VP24	VP24_NT	PRDX3	Q53HC2	Peroxiredoxin 3 isoform a variant	VP24|PRDX3	VP24_NT|PRDX3	33	8.25	0.98	2.72	9.43	0
VP24	VP24_NT	RPL13	Q6NZ55	ribosomal protein L13(RPL13)	VP24|RPL13	VP24_NT|RPL13	24	6	1	6.91	60	0			6137	ribosomal protein L13(RPL13)
VP24	VP24_NT	RPL13A	M0QYS1	ribosomal protein L13a(RPL13A)	VP24|RPL13A	VP24_NT|RPL13A	28	7	1	10.22	70	0			23521	ribosomal protein L13a(RPL13A)
VP24	VP24_NT	RPL15	A0A024R2Q4	ribosomal protein L15(RPL15)	VP24|RPL15	VP24_NT|RPL15	41	10.25	0.95	2.98	10.25	0.01			6138	ribosomal protein L15(RPL15)
VP24	VP24_NT	RPL19	J3KTE4	ribosomal protein L19(RPL19)	VP24|RPL19	VP24_NT|RPL19	20	5	1	5.16	50	0			6143	ribosomal protein L19(RPL19)
VP24	VP24_NT	RPL23	A0A024R1Q8	ribosomal protein L23(RPL23)	VP24|RPL23	VP24_NT|RPL23	26	6.5	0.98	3.14	17.33	0			9349	ribosomal protein L23(RPL23)
VP24	VP24_NT	RPL5	A2RUM7	ribosomal protein L5(RPL5)	VP24|RPL5	VP24_NT|RPL5	64	16	1	16.52	160	0			6125	ribosomal protein L5(RPL5)
VP24	VP24_NT	RPL7A	P62424	ribosomal protein L7a(RPL7A)	VP24|RPL7A	VP24_NT|RPL7A	48	12	1	13.41	120	0			6130	ribosomal protein L7a(RPL7A)
VP24	VP24_NT	RPS11	P62280	ribosomal protein S11(RPS11)	VP24|RPS11	VP24_NT|RPS11	71	17.75	0.99	4.16	12.91	0			6205	ribosomal protein S11(RPS11)
VP24	VP24_NT	RPS15A	B2R4W8	ribosomal protein S15a(RPS15A)	VP24|RPS15A	VP24_NT|RPS15A	47	11.75	0.91	1.19	7.83	0.01			6210	ribosomal protein S15a(RPS15A)
VP24	VP24_NT	RPS2	Q3KQT6	ribosomal protein S2(RPS2)	VP24|RPS2	VP24_NT|RPS2	19	4.75	1	6.91	47.5	0	ENSG00000140988	ribosomal protein S2(RPS2)	6187	ribosomal protein S2(RPS2)
VP24	VP24_NT	RPS6	A2A3R6	ribosomal protein S6(RPS6)	VP24|RPS6	VP24_NT|RPS6	48	12	0.94	2.11	8	0.01			6194	ribosomal protein S6(RPS6)
VP24	VP24_NT	RPS8	Q5JR94	ribosomal protein S8(RPS8)	VP24|RPS8	VP24_NT|RPS8	52	13	0.99	3.84	17.33	0			6202	ribosomal protein S8(RPS8)
VP24	VP24_NT	STRN	O43815	striatin(STRN)	VP24|STRN	VP24_NT|STRN	65	16.25	0.96	2.88	9.29	0			6801	striatin(STRN)
VP24	VP24_NT	TJP1	G5E9E7	tight junction protein 1(TJP1)	VP24|TJP1	VP24_NT|TJP1	485	121.25	0.96	3.22	4.87	0			7082	tight junction protein 1(TJP1)
VP24	VP24_NT	TMEM263	Q8WUH6	transmembrane protein 263(TMEM263)	VP24|TMEM263	VP24_NT|TMEM263	73	18.25	1	22.6	182.5	0			90488	transmembrane protein 263(TMEM263)
VP24	VP24_NT	TNRC6A	Q8NDV7	trinucleotide repeat containing 6A(TNRC6A)	VP24|TNRC6A	VP24_NT|TNRC6A	266	66.5	0.99	4.02	7	0	ENSG00000090905	trinucleotide repeat containing 6A(TNRC6A)	27327	trinucleotide repeat containing 6A(TNRC6A)
VP24	VP24_NT	TOP2A	P11388	topoisomerase (DNA) II alpha(TOP2A)	VP24|TOP2A	VP24_NT|TOP2A	115	28.75	0.96	2.7	7.19	0.01			7153	topoisomerase (DNA) II alpha(TOP2A)
VP24	VP24_NT	TUFM	P49411	Tu translation elongation factor, mitochondrial(TUFM)	VP24|TUFM	VP24_NT|TUFM	59	14.75	0.91	1.26	5.62	0.01			7284	Tu translation elongation factor, mitochondrial(TUFM)
VP24	VP24_NT	VDAC2	A0A024QZT0	voltage dependent anion channel 2(VDAC2)	VP24|VDAC2	VP24_NT|VDAC2	76	19	1	24.1	190	0			7417	voltage dependent anion channel 2(VDAC2)
VP24	VP24_NT	VDAC3	Q9Y277	voltage dependent anion channel 3(VDAC3)	VP24|VDAC3	VP24_NT|VDAC3	18	4.5	1	5.16	45	0			7419	voltage dependent anion channel 3(VDAC3)
VP24	VP24_NT	WDCP	Q9H6R7	WD repeat and coiled coil containing(WDCP)	VP24|WDCP	VP24_NT|WDCP	165	41.25	0.99	4.94	8.05	0			80304	WD repeat and coiled coil containing(WDCP)
VP30	VP30_CT	ABI2	A0A0C4DG21	abl interactor 2(ABI2)	VP30|ABI2	VP30_CT|ABI2	30	7.5	1	9.65	75	0			10152	abl interactor 2(ABI2)
VP30	VP30_CT	CGN	B9EK46	cingulin(CGN)	VP30|CGN	VP30_CT|CGN	196	49	0.92	2.1	5.6	0			57530	cingulin(CGN)
VP30	VP30_CT	FUBP3	A0A024R8A7	far upstream element binding protein 3(FUBP3)	VP30|FUBP3	VP30_CT|FUBP3	90	22.5	0.97	2.63	12.86	0			8939	far upstream element binding protein 3(FUBP3)
VP30	VP30_CT	HNRNPU	B3KX72	cDNA FLJ44920 fis, clone BRAMY3011501, highly similar to Heterogeneous nuclear ribonucleoprotein U	VP30|HNRNPU	VP30_CT|HNRNPU	64	16	1	20.52	160	0
VP30	VP30_CT	IGF2BP2	B4DKT5	insulin like growth factor 2 mRNA binding protein 2(IGF2BP2)	VP30|IGF2BP2	VP30_CT|IGF2BP2	41	10.25	1	12.84	102.5	0	ENSG00000073792	insulin like growth factor 2 mRNA binding protein 2(IGF2BP2)	10644	insulin like growth factor 2 mRNA binding protein 2(IGF2BP2)
VP30	VP30_CT	PABPC4	B1ANR0	poly(A) binding protein cytoplasmic 4(PABPC4)	VP30|PABPC4	VP30_CT|PABPC4	109	27.25	1	33.89	272.5	0			8761	poly(A) binding protein cytoplasmic 4(PABPC4)
VP30	VP30_CT	PDLIM5	A0A024RDE8	PDZ and LIM domain 5(PDLIM5)	VP30|PDLIM5	VP30_CT|PDLIM5	33	8.25	0.84	1.12	6.6	0.01	ENSG00000163110	PDZ and LIM domain 5(PDLIM5)	10611	PDZ and LIM domain 5(PDLIM5)
VP30	VP30_CT	RBBP6	Q7Z6E9	RB binding protein 6, ubiquitin ligase(RBBP6)	VP30|RBBP6	VP30_CT|RBBP6	478	119.5	1	5	13.1	0	ENSG00000122257	RB binding protein 6, ubiquitin ligase(RBBP6)	5930	RB binding protein 6, ubiquitin ligase(RBBP6)
VP30	VP30_CT	WIPF2	Q8TF74	WAS/WASL interacting protein family member 2(WIPF2)	VP30|WIPF2	VP30_CT|WIPF2	66	16.5	1	19.01	165	0	ENSG00000171475	WAS/WASL interacting protein family member 2(WIPF2)	147179	WAS/WASL interacting protein family member 2(WIPF2)
VP30	VP30_NT	CGN	B9EK46	cingulin(CGN)	VP30|CGN	VP30_NT|CGN	459	114.75	1	4.81	13.11	0			57530	cingulin(CGN)
VP30	VP30_NT	CGNL1	Q0VF96	cingulin like 1(CGNL1)	VP30|CGNL1	VP30_NT|CGNL1	168	42	1	50.07	420	0	ENSG00000128849	cingulin like 1(CGNL1)	84952	cingulin like 1(CGNL1)
VP30	VP30_NT	KIAA1462	Q9P266	KIAA1462(KIAA1462)	VP30|KIAA1462	VP30_NT|KIAA1462	129	32.25	1	25.18	322.5	0			57608	KIAA1462(KIAA1462)
VP30	VP30_NT	RPL24	C9JNW5	ribosomal protein L24(RPL24)	VP30|RPL24	VP30_NT|RPL24	35	8.75	0.89	1.71	7.78	0.01			6152	ribosomal protein L24(RPL24)
VP30	VP30_NT	TJP1	G5E9E7	tight junction protein 1(TJP1)	VP30|TJP1	VP30_NT|TJP1	932	233	0.99	4.45	9.37	0			7082	tight junction protein 1(TJP1)
VP30	VP30_NT	TJP2	A0A024R233	tight junction protein 2(TJP2)	VP30|TJP2	VP30_NT|TJP2	317	79.25	0.97	3.32	7.64	0.01			9414	tight junction protein 2(TJP2)
VP30	VP30_NT	TMEM263	Q8WUH6	transmembrane protein 263(TMEM263)	VP30|TMEM263	VP30_NT|TMEM263	61	15.25	1	19.17	152.5	0			90488	transmembrane protein 263(TMEM263)
VP30	VP30_NT	TNRC6B	Q9UPQ9	trinucleotide repeat containing 6B(TNRC6B)	VP30|TNRC6B	VP30_NT|TNRC6B	89	22.25	1	14.56	222.5	0			23112	trinucleotide repeat containing 6B(TNRC6B)
VP30	VP30_NT	VIM	B0YJC4	vimentin(VIM)	VP30|VIM	VP30_NT|VIM	65	16.25	0.97	3.37	14.44	0			7431	vimentin(VIM)
VP30	VP30_NT	YWHAE/FAM22A	G9K388	YWHAE/FAM22A fusion protein	VP30|YWHAE/FAM22A	VP30_NT|YWHAE/FAM22A	569	142.25	0.99	3.83	12.51	0
VP35	VP35_CT	AMOT	Q4VCS5	angiomotin(AMOT)	VP35|AMOT	VP35_CT|AMOT	84	21	1	14.62	210	0			154796	angiomotin(AMOT)
VP35	VP35_CT	CEP192	Q8TEP8	centrosomal protein 192(CEP192)	VP35|CEP192	VP35_CT|CEP192	329	82.25	0.98	3.52	6.45	0			55125	centrosomal protein 192(CEP192)
VP35	VP35_CT	EDC3	Q96F86	enhancer of mRNA decapping 3(EDC3)	VP35|EDC3	VP35_CT|EDC3	69	17.25	1	20.74	172.5	0	ENSG00000179151	enhancer of mRNA decapping 3(EDC3)	80153	enhancer of mRNA decapping 3(EDC3)
VP35	VP35_CT	KIAA1462	Q9P266	KIAA1462(KIAA1462)	VP35|KIAA1462	VP35_CT|KIAA1462	56	14	1	14.62	140	0			57608	KIAA1462(KIAA1462)
VP35	VP35_CT	LTV1	Q96GA3	LTV1 ribosome biogenesis factor(LTV1)	VP35|LTV1	VP35_CT|LTV1	89	22.25	1	23.74	222.5	0			84946	LTV1 ribosome biogenesis factor(LTV1)
VP35	VP35_CT	TAGLN2	X6RJP6	transgelin 2(TAGLN2)	VP35|TAGLN2	VP35_CT|TAGLN2	75	18.75	0.94	2.32	9.38	0.01			8407	transgelin 2(TAGLN2)
VP35	VP35_CT	TJP1	G5E9E7	tight junction protein 1(TJP1)	VP35|TJP1	VP35_CT|TJP1	647	161.75	0.98	3.4	6.5	0			7082	tight junction protein 1(TJP1)
VP35	VP35_CT	TJP2	A0A024R233	tight junction protein 2(TJP2)	VP35|TJP2	VP35_CT|TJP2	234	58.5	0.94	2.47	5.64	0.01			9414	tight junction protein 2(TJP2)
VP35	VP35_NT	ABLIM1	B7Z4H1	actin binding LIM protein 1(ABLIM1)	VP35|ABLIM1	VP35_NT|ABLIM1	46	11.5	1	18.29	115	0			3983	actin binding LIM protein 1(ABLIM1)
VP35	VP35_NT	AGO2	A4FVC0	argonaute 2, RISC catalytic component(AGO2)	VP35|AGO2	VP35_NT|AGO2	64	16	1	18.29	160	0			27161	argonaute 2, RISC catalytic component(AGO2)
VP35	VP35_NT	AMOT	Q4VCS5	angiomotin(AMOT)	VP35|AMOT	VP35_NT|AMOT	85	21.25	1	31.76	212.5	0			154796	angiomotin(AMOT)
VP35	VP35_NT	ATXN2	H0YH87	ataxin 2(ATXN2)	VP35|ATXN2	VP35_NT|ATXN2	92	23	0.97	2.56	8	0			6311	ataxin 2(ATXN2)
VP35	VP35_NT	B3KQ71	B3KQ71	cDNA FLJ32982 fis, clone THYMU1000002, highly similar to Golgi phosphoprotein 3	VP35|B3KQ71	VP35_NT|B3KQ71	23	5.75	0.87	1.6	5.75	0.01
VP35	VP35_NT	B3KSV4	B3KSV4	cDNA FLJ37129 fis, clone BRACE2022990	VP35|B3KSV4	VP35_NT|B3KSV4	65	16.25	1	24.34	162.5	0
VP35	VP35_NT	BCCIP	Q9P287	BRCA2 and CDKN1A interacting protein(BCCIP)	VP35|BCCIP	VP35_NT|BCCIP	73	18.25	1	22.84	182.5	0	ENSG00000107949	BRCA2 and CDKN1A interacting protein(BCCIP)	56647	BRCA2 and CDKN1A interacting protein(BCCIP)
VP35	VP35_NT	BRCA2	P51587	BRCA2, DNA repair associated(BRCA2)	VP35|BRCA2	VP35_NT|BRCA2	192	48	1	47.82	480	0			675	BRCA2, DNA repair associated(BRCA2)
VP35	VP35_NT	CCDC85C	A6NKD9	coiled-coil domain containing 85C(CCDC85C)	VP35|CCDC85C	VP35_NT|CCDC85C	31	7.75	0.79	0.62	4.13	0.01			317762	coiled-coil domain containing 85C(CCDC85C)
VP35	VP35_NT	CEP192	Q8TEP8	centrosomal protein 192(CEP192)	VP35|CEP192	VP35_NT|CEP192	404	101	0.99	4.23	7.92	0			55125	centrosomal protein 192(CEP192)
VP35	VP35_NT	CEP55	D3DR37	centrosomal protein 55(CEP55)	VP35|CEP55	VP35_NT|CEP55	59	14.75	0.98	3.29	11.8	0			55165	centrosomal protein 55(CEP55)
VP35	VP35_NT	CEP85	Q6P2H3	centrosomal protein 85(CEP85)	VP35|CEP85	VP35_NT|CEP85	53	13.25	1	21.33	132.5	0			64793	centrosomal protein 85(CEP85)
VP35	VP35_NT	CGN	B9EK46	cingulin(CGN)	VP35|CGN	VP35_NT|CGN	325	81.25	0.99	4.1	9.29	0			57530	cingulin(CGN)
VP35	VP35_NT	CGNL1	Q0VF96	cingulin like 1(CGNL1)	VP35|CGNL1	VP35_NT|CGNL1	89	22.25	1	33.23	222.5	0	ENSG00000128849	cingulin like 1(CGNL1)	84952	cingulin like 1(CGNL1)
VP35	VP35_NT	CYLD	A0A024R6T1	CYLD lysine 63 deubiquitinase(CYLD)	VP35|CYLD	VP35_NT|CYLD	222	55.5	1	73.74	555	0			1540	CYLD lysine 63 deubiquitinase(CYLD)
VP35	VP35_NT	DSP	P15924	desmoplakin(DSP)	VP35|DSP	VP35_NT|DSP	373	93.25	0.98	3.35	6.07	0			1832	desmoplakin(DSP)
VP35	VP35_NT	EPS15L1	A0A024R7G6	epidermal growth factor receptor pathway substrate 15 like 1(EPS15L1)	VP35|EPS15L1	VP35_NT|EPS15L1	42	10.5	1	8.83	105	0			58513	epidermal growth factor receptor pathway substrate 15 like 1(EPS15L1)
VP35	VP35_NT	FAM21C	A0A096LPC5	family with sequence similarity 21 member C(FAM21C)	VP35|FAM21C	VP35_NT|FAM21C	477	119.25	1	147.74	1192.5	0			253725	family with sequence similarity 21 member C(FAM21C)
VP35	VP35_NT	FUBP3	A0A024R8A7	far upstream element binding protein 3(FUBP3)	VP35|FUBP3	VP35_NT|FUBP3	78	19.5	0.97	2.57	11.14	0			8939	far upstream element binding protein 3(FUBP3)
VP35	VP35_NT	HRB	A0A024R458	HIV-1 Rev binding protein, isoform CRA_a	VP35|HRB	VP35_NT|HRB	39	9.75	0.89	1.48	5.57	0.01
VP35	VP35_NT	IGF2BP1	Q9NZI8	insulin like growth factor 2 mRNA binding protein 1(IGF2BP1)	VP35|IGF2BP1	VP35_NT|IGF2BP1	265	66.25	0.92	1.56	4.45	0.01			10642	insulin like growth factor 2 mRNA binding protein 1(IGF2BP1)
VP35	VP35_NT	KIAA0430	Q9Y4F3	KIAA0430(KIAA0430)	VP35|KIAA0430	VP35_NT|KIAA0430	241	60.25	1	70.87	602.5	0			9665	KIAA0430(KIAA0430)
VP35	VP35_NT	KIAA1191	A0A024R7Q7	KIAA1191(KIAA1191)	VP35|KIAA1191	VP35_NT|KIAA1191	35	8.75	1	8.83	87.5	0			57179	KIAA1191(KIAA1191)
VP35	VP35_NT	KIAA1671	Q9BY89	KIAA1671(KIAA1671)	VP35|KIAA1671	VP35_NT|KIAA1671	541	135.25	1	5.39	8.8	0			85379	KIAA1671(KIAA1671)
VP35	VP35_NT	KIF14	Q15058	kinesin family member 14(KIF14)	VP35|KIF14	VP35_NT|KIF14	478	119.5	0.99	4.48	8.77	0			9928	kinesin family member 14(KIF14)
VP35	VP35_NT	LATS1	O95835	large tumor suppressor kinase 1(LATS1)	VP35|LATS1	VP35_NT|LATS1	82	20.5	1	28.8	205	0			9113	large tumor suppressor kinase 1(LATS1)
VP35	VP35_NT	LPP	A0A087WZF1	LIM domain containing preferred translocation partner in lipoma(LPP)	VP35|LPP	VP35_NT|LPP	95	23.75	0.95	2.73	5.59	0.01			4026	LIM domain containing preferred translocation partner in lipoma(LPP)
VP35	VP35_NT	MPHOSPH9	Q99550	M-phase phosphoprotein 9(MPHOSPH9)	VP35|MPHOSPH9	VP35_NT|MPHOSPH9	347	86.75	1	119.36	867.5	0	ENSG00000051825	M-phase phosphoprotein 9(MPHOSPH9)	10198	M-phase phosphoprotein 9(MPHOSPH9)
VP35	VP35_NT	NFX1	Q12986	nuclear transcription factor, X-box binding 1(NFX1)	VP35|NFX1	VP35_NT|NFX1	53	13.25	1	12.07	132.5	0			4799	nuclear transcription factor, X-box binding 1(NFX1)
VP35	VP35_NT	PDLIM5	A0A024RDE8	PDZ and LIM domain 5(PDLIM5)	VP35|PDLIM5	VP35_NT|PDLIM5	90	22.5	0.99	4.26	18	0	ENSG00000163110	PDZ and LIM domain 5(PDLIM5)	10611	PDZ and LIM domain 5(PDLIM5)
VP35	VP35_NT	PRDX3	Q53HC2	Peroxiredoxin 3 isoform a variant	VP35|PRDX3	VP35_NT|PRDX3	23	5.75	0.91	1.38	6.57	0.01
VP35	VP35_NT	PRMT7	A0A024R6Z2	protein arginine methyltransferase 7(PRMT7)	VP35|PRMT7	VP35_NT|PRMT7	19	4.75	1	5.4	47.5	0			54496	protein arginine methyltransferase 7(PRMT7)
VP35	VP35_NT	PRRC2A	P48634	proline rich coiled-coil 2A(PRRC2A)	VP35|PRRC2A	VP35_NT|PRRC2A	301	75.25	0.97	3.37	5.73	0			7916	proline rich coiled-coil 2A(PRRC2A)
VP35	VP35_NT	PRRC2B	Q5JSZ5	proline rich coiled-coil 2B(PRRC2B)	VP35|PRRC2B	VP35_NT|PRRC2B	134	33.5	0.98	3.93	9.93	0			84726	proline rich coiled-coil 2B(PRRC2B)
VP35	VP35_NT	RPS15A	B2R4W8	ribosomal protein S15a(RPS15A)	VP35|RPS15A	VP35_NT|RPS15A	41	10.25	0.93	2.34	6.83	0.01			6210	ribosomal protein S15a(RPS15A)
VP35	VP35_NT	SEC24A	B4E205	SEC24 homolog A, COPII coat complex component(SEC24A)	VP35|SEC24A	VP35_NT|SEC24A	33	8.25	0.89	1.76	5.5	0.01			10802	SEC24 homolog A, COPII coat complex component(SEC24A)
VP35	VP35_NT	SIPA1L3	B2RWP0	signal induced proliferation associated 1 like 3(SIPA1L3)	VP35|SIPA1L3	VP35_NT|SIPA1L3	134	33.5	1	40.55	335	0			23094	signal induced proliferation associated 1 like 3(SIPA1L3)
VP35	VP35_NT	SMAP1	B2RDK5	cDNA, FLJ96655, highly similar to Homo sapiens stromal membrane-associated protein 1 (SMAP1), mRNA	VP35|SMAP1	VP35_NT|SMAP1	25	6.25	0.87	1.46	5.56	0.01
VP35	VP35_NT	STAU1	A8K622	cDNA FLJ75871, highly similar to Homo sapiens staufen, RNA binding protein (STAU), transcript variant T3, mRNA	VP35|STAU1	VP35_NT|STAU1	276	69	0.98	3.89	8.24	0
VP35	VP35_NT	TAB2	Q9NYJ8	TGF-beta activated kinase 1/MAP3K7 binding protein 2(TAB2)	VP35|TAB2	VP35_NT|TAB2	108	27	0.99	4.58	16.62	0			23118	TGF-beta activated kinase 1/MAP3K7 binding protein 2(TAB2)
VP35	VP35_NT	TJP1	G5E9E7	tight junction protein 1(TJP1)	VP35|TJP1	VP35_NT|TJP1	1234	308.5	1	6.42	12.4	0			7082	tight junction protein 1(TJP1)
VP35	VP35_NT	TJP2	A0A024R233	tight junction protein 2(TJP2)	VP35|TJP2	VP35_NT|TJP2	216	54	0.9	0.91	5.2	0.01			9414	tight junction protein 2(TJP2)
VP35	VP35_NT	TNRC6C	A0A1B0GU24	trinucleotide repeat containing 6C(TNRC6C)	VP35|TNRC6C	VP35_NT|TNRC6C	248	62	1	79.46	620	0			57690	trinucleotide repeat containing 6C(TNRC6C)
VP35	VP35_NT	TTK	P33981	TTK protein kinase(TTK)	VP35|TTK	VP35_NT|TTK	83	20.75	1	5.11	23.71	0			7272	TTK protein kinase(TTK)
VP35	VP35_NT	TUFM	P49411	Tu translation elongation factor, mitochondrial(TUFM)	VP35|TUFM	VP35_NT|TUFM	63	15.75	0.95	1.96	6	0			7284	Tu translation elongation factor, mitochondrial(TUFM)
VP35	VP35_NT	TXLNG	Q9NUQ3	taxilin gamma(TXLNG)	VP35|TXLNG	VP35_NT|TXLNG	46	11.5	1	8.83	115	0			55787	taxilin gamma(TXLNG)
VP35	VP35_NT	UBAP2	Q5T6F2	ubiquitin associated protein 2(UBAP2)	VP35|UBAP2	VP35_NT|UBAP2	144	36	1	7.45	41.14	0			55833	ubiquitin associated protein 2(UBAP2)
VP35	VP35_NT	UPF1	A0A024R7L5	UPF1, RNA helicase and ATPase(UPF1)	VP35|UPF1	VP35_NT|UPF1	99	24.75	0.99	4.39	24.75	0			5976	UPF1, RNA helicase and ATPase(UPF1)
VP35	VP35_NT	USP54	Q70EL1	ubiquitin specific peptidase 54(USP54)	VP35|USP54	VP35_NT|USP54	72	18	1	24.34	180	0			159195	ubiquitin specific peptidase 54(USP54)
VP35	VP35_NT	YTHDC2	Q9H6S0	YTH domain containing 2(YTHDC2)	VP35|YTHDC2	VP35_NT|YTHDC2	168	42	1	4.79	21	0			64848	YTH domain containing 2(YTHDC2)
VP35	VP35_NT	YTHDF2	B5BU99	YTH N6-methyladenosine RNA binding protein 2(YTHDF2)	VP35|YTHDF2	VP35_NT|YTHDF2	80	20	0.98	3.18	9.41	0			51441	YTH N6-methyladenosine RNA binding protein 2(YTHDF2)
VP35	VP35_NT	YTHDF3	A0A024R7W5	YTH N6-methyladenosine RNA binding protein 3(YTHDF3)	VP35|YTHDF3	VP35_NT|YTHDF3	80	20	0.96	3.04	7.62	0			253943	YTH N6-methyladenosine RNA binding protein 3(YTHDF3)
VP35	VP35_NT	ZC3HAV1	Q7Z2W4	zinc finger CCCH-type containing, antiviral 1(ZC3HAV1)	VP35|ZC3HAV1	VP35_NT|ZC3HAV1	627	156.75	0.99	4.27	5.6	0			56829	zinc finger CCCH-type containing, antiviral 1(ZC3HAV1)
VP35	VP35_NT	ZNF598	Q86UK7	zinc finger protein 598(ZNF598)	VP35|ZNF598	VP35_NT|ZNF598	59	14.75	0.97	2.22	10.73	0			90850	zinc finger protein 598(ZNF598)
VP40	VP40_CT	EIF5A	I3L397	eukaryotic translation initiation factor 5A(EIF5A)	VP40|EIF5A	VP40_CT|EIF5A	48	12	1	9.37	120	0			1984	eukaryotic translation initiation factor 5A(EIF5A)
VP40	VP40_CT	PIAS1	O75925	protein inhibitor of activated STAT 1(PIAS1)	VP40|PIAS1	VP40_CT|PIAS1	48	12	1	7.73	120	0			8554	protein inhibitor of activated STAT 1(PIAS1)
VP40	VP40_CT	SEC16A	F1T0I1	SEC16 homolog A, endoplasmic reticulum export factor(SEC16A)	VP40|SEC16A	VP40_CT|SEC16A	189	47.25	0.94	2.48	8.59	0			9919	SEC16 homolog A, endoplasmic reticulum export factor(SEC16A)
VP40	VP40_CT	SMCR8	Q8TEV9	Smith-Magenis syndrome chromosome region, candidate 8(SMCR8)	VP40|SMCR8	VP40_CT|SMCR8	69	17.25	1	23.24	172.5	0	ENSG00000176994	Smith-Magenis syndrome chromosome region, candidate 8(SMCR8)	140775	Smith-Magenis syndrome chromosome region, candidate 8(SMCR8)
VP40	VP40_NT	AARSD1	Q9BTE6	alanyl-tRNA synthetase domain containing 1(AARSD1)	VP40|AARSD1	VP40_NT|AARSD1	84	21	1	29.95	210	0			80755	alanyl-tRNA synthetase domain containing 1(AARSD1)
VP40	VP40_NT	AFDN	J3KN01	afadin, adherens junction formation factor(AFDN)	VP40|AFDN	VP40_NT|AFDN	397	99.25	0.95	2.84	4.87	0.01	ENSG00000130396	afadin, adherens junction formation factor(AFDN)	4301	afadin, adherens junction formation factor(AFDN)
VP40	VP40_NT	BCCIP	Q9P287	BRCA2 and CDKN1A interacting protein(BCCIP)	VP40|BCCIP	VP40_NT|BCCIP	104	26	1	32.9	260	0	ENSG00000107949	BRCA2 and CDKN1A interacting protein(BCCIP)	56647	BRCA2 and CDKN1A interacting protein(BCCIP)
VP40	VP40_NT	CCT3	B3KX11	chaperonin containing TCP1 subunit 3(CCT3)	VP40|CCT3	VP40_NT|CCT3	43	10.75	1	13.32	107.5	0			7203	chaperonin containing TCP1 subunit 3(CCT3)
VP40	VP40_NT	FAM171A2	A8MVW0	family with sequence similarity 171 member A2(FAM171A2)	VP40|FAM171A2	VP40_NT|FAM171A2	43	10.75	1	14.88	107.5	0			284069	family with sequence similarity 171 member A2(FAM171A2)
VP40	VP40_NT	FAM21C	A0A096LPC5	family with sequence similarity 21 member C(FAM21C)	VP40|FAM21C	VP40_NT|FAM21C	341	85.25	1	119.03	852.5	0			253725	family with sequence similarity 21 member C(FAM21C)
VP40	VP40_NT	FASN	P49327	fatty acid synthase(FASN)	VP40|FASN	VP40_NT|FASN	797	199.25	0.99	4.67	11.81	0			2194	fatty acid synthase(FASN)
VP40	VP40_NT	HN1	J3KT51	hematological and neurological expressed 1(HN1)	VP40|HN1	VP40_NT|HN1	32	8	1	8.5	80	0			51155	hematological and neurological expressed 1(HN1)
VP40	VP40_NT	IPO7	O95373	importin 7(IPO7)	VP40|IPO7	VP40_NT|IPO7	49	12.25	0.96	2.75	10.89	0			10527	importin 7(IPO7)
VP40	VP40_NT	JUP	A0A024R1X8	junction plakoglobin(JUP)	VP40|JUP	VP40_NT|JUP	102	25.5	0.99	3.66	13.6	0			3728	junction plakoglobin(JUP)
VP40	VP40_NT	LRIF1	Q5T3J3	ligand dependent nuclear receptor interacting factor 1(LRIF1)	VP40|LRIF1	VP40_NT|LRIF1	30	7.5	0.92	1.49	10	0.01			55791	ligand dependent nuclear receptor interacting factor 1(LRIF1)
VP40	VP40_NT	PDLIM5	A0A024RDE8	PDZ and LIM domain 5(PDLIM5)	VP40|PDLIM5	VP40_NT|PDLIM5	48	12	0.94	2.36	9.6	0.01	ENSG00000163110	PDZ and LIM domain 5(PDLIM5)	10611	PDZ and LIM domain 5(PDLIM5)
VP40	VP40_NT	PRMT7	A0A024R6Z2	protein arginine methyltransferase 7(PRMT7)	VP40|PRMT7	VP40_NT|PRMT7	35	8.75	1	8.5	87.5	0			54496	protein arginine methyltransferase 7(PRMT7)
VP40	VP40_NT	RPL7A	P62424	ribosomal protein L7a(RPL7A)	VP40|RPL7A	VP40_NT|RPL7A	78	19.5	1	28.47	195	0			6130	ribosomal protein L7a(RPL7A)
VP40	VP40_NT	RPS11	P62280	ribosomal protein S11(RPS11)	VP40|RPS11	VP40_NT|RPS11	44	11	0.92	1.57	8	0.01			6205	ribosomal protein S11(RPS11)
VP40	VP40_NT	RPS15A	B2R4W8	ribosomal protein S15a(RPS15A)	VP40|RPS15A	VP40_NT|RPS15A	44	11	0.92	2.01	7.33	0.01			6210	ribosomal protein S15a(RPS15A)
VP40	VP40_NT	SEC16A	F1T0I1	SEC16 homolog A, endoplasmic reticulum export factor(SEC16A)	VP40|SEC16A	VP40_NT|SEC16A	302	75.5	0.99	4.06	13.73	0			9919	SEC16 homolog A, endoplasmic reticulum export factor(SEC16A)
VP40	VP40_NT	TJP1	G5E9E7	tight junction protein 1(TJP1)	VP40|TJP1	VP40_NT|TJP1	637	159.25	0.98	3.77	6.4	0			7082	tight junction protein 1(TJP1)
VP40	VP40_NT	TJP2	A0A024R233	tight junction protein 2(TJP2)	VP40|TJP2	VP40_NT|TJP2	225	56.25	0.93	1.78	5.42	0.01			9414	tight junction protein 2(TJP2)
VP40	VP40_NT	TNRC6B	Q9UPQ9	trinucleotide repeat containing 6B(TNRC6B)	VP40|TNRC6B	VP40_NT|TNRC6B	146	36.5	1	47.49	365	0			23112	trinucleotide repeat containing 6B(TNRC6B)
