# Supplementary material for: A protein-proximity screen reveals Ebola virus co-opts the mRNA decapping complex through the scaffold protein EDC4
Source: Research Square preprint supplement (doi:10.21203/rs.3.rs-3838220/v1), 2024-02-01
Supplement: Supplementary file 5 [file Extended data table 2.xlsx]

## Sheet: Sheet1
Bait	Prey	Saint Score
NP	AHNAK	1
VP35	EDC4	1
VP24	CSE1L	1
NP	TJP1	1
VP35	TJP1	1
NP	KIF14	1
NP	KIAA1671	1
VP30	RBBP6	1
VP30	TJP1	0.99
VP35	XRN1	1
VP40	FASN	0.99
NP	CGN	1
VP24	KPNA6	1
VP40	TJP1	0.98
VP35	TNRC6A	1
VP35	ZC3HAV1	0.99
VP24	NUP214	0.98
VP24	KPNA1	1
VP30	YWHAE/FAM22A	0.99
VP35	KIAA1671	1
NP	AHNAK2	1
NP	CD2AP	0.98
VP24	OSBPL8	1
NP	CGNL1	1
NP	TANC1	1
VP24	TJP1	0.96
VP35	KIF14	0.99
VP35	FAM21C	1
NP	TTF2	1
NP	CEP192	1
VP30	CGN	1
NP	KNL1	0.99
VP35	CEP192	0.99
VP40	AFDN	0.95
NP	PPP2R5D	1
VP35	DSP	0.98
NP	TJP2	0.99
VP35	MPHOSPH9	1
NP	NEDD1	1
NP	CKAP5	0.98
VP40	FAM21C	1
NP	IFT74	0.99
NP	EGLN1	0.99
VP35	CGN	0.99
VP24	KPNA5	0.75
NP	CAMSAP3	0.96
VP30	TJP2	0.97
VP40	NOTCH2	1
NP	POC5	1
NP	TP53	1
VP40	SEC16A	0.99
VP35	PRRC2A	0.97
NP	B6E4X6	1
NP	PPP2R5C	1
VP24	TAF1	1
NP	TNRC6B	1
NP	LUZP1	0.99
VP35	STAU1	0.98
VP24	TCERG1	0.94
NP	RNF219	0.99
NP	BRCA2	1
NP	NAV1	1
VP24	TNRC6A	0.99
VP35	IGF2BP1	0.92
NP	DSP	0.89
VP40	DSG2	1
NP	FLNA	1
VP35	DCP1B	1
NP	MAP7D3	1
NP	MPHOSPH9	1
VP35	PATL1	1
VP35	EDC3	1
VP24	MCM3AP	1
NP	TRIM25	0.99
VP35	TNRC6C	1
VP35	KIAA0430	1
NP	CNOT1	0.99
VP35	TJP2	0.94
NP	COBL	1
NP	WDCP	1
VP40	TJP2	0.93
NP	RBBP7	1
VP35	CYLD	1
NP	CC2D1A	0.98
VP30	AFDN	1
VP24	ICE1	1
NP	SIPA1L1	0.75
VP30	PABPC1	1
VP24	ESYT1	0.94
NP	SKA3	1
NP	KIAA1217	1
NP	PALLD	0.88
VP35	SMG7	1
VP24	KPNA2	1
VP24	CCAR2	0.96
NP	CP110	1
NP	NBN	0.98
VP35	ZMYM1	1
VP35	BRCA2	1
NP	SIPA1L3	1
VP24	POM121C	1
VP35	DCP1A	0.75
VP24	HDLBP	0.75
VP35	JCAD	1
NP	TAB2	1
NP	GIT1	1
NP	SND1	1
VP35	IGF2BP2	1
VP30	CGNL1	1
VP35	YTHDC2	1
VP35	EIF4ENIF1	1
VP24	WDCP	0.99
NP	NCOA6	1
VP35	DDX6	1
NP	CAMSAP2	1
VP24	CNOT1	0.92
VP24	WASF2	1
NP	CSPP1	1
VP24	POM121	1
VP40	TNRC6B	1
NP	KIAA0368	0.98
VP35	UBAP2	1
VP24	BCCIP	0.99
NP	CYLD	1
NP	SVIL	0.75
NP	PIK3C2A	1
NP	TTK	1
VP35	DYNLL1	1
VP40	SMCR8	1
VP35	PRRC2B	0.98
VP35	SIPA1L3	1
VP24	NIFK	1
NP	LPP	0.98
VP30	WIPF2	1
VP24	F4ZW65	0.95
NP	SYNJ2	1
VP30	KIAA1462	1
NP	ATP6V1A	0.99
NP	NPAT	0.75
NP	TUBGCP2	1
NP	B3KSV4	1
NP	TNRC6C	1
VP35	DCP2	1
VP24	TOP2A	0.96
VP40	LTN1	0.75
NP	RBBP4	1
NP	UBN2	1
VP24	WDR12	1
VP30	YEATS2	0.95
NP	MAP3K7	1
VP35	GAS8	1
NP	BACH1	0.99
VP30	PABPC4	1
VP35	TAB2	0.99
NP	PLEKHG1	1
NP	RPS27A	0.97
NP	TRPS1	1
NP	KIAA1462	1
VP40	BCCIP	1
NP	FXR1	0.94
NP	NCKAP5L	1
VP40	PPM1B	1
VP40	JUP	0.99
VP40	EPB41	0.98
VP40	USP6NL	1
NP	ZNF507	1
NP	ABL2	1
VP40	NECTIN2	1
VP35	UPF1	0.99
NP	HSPD1	0.99
VP24	TAF9	0.93
NP	CASC5	0.96
VP35	MEIOC	1
VP35	LPP	0.95
NP	GEN1	1
VP35	LSM14A	1
VP24	POLR3C	1
NP	ARHGAP29	1
NP	ZMYM1	0.95
VP35	ATXN2	0.97
VP35	DYNLL2	1
VP40	GPSM1	0.75
NP	IBTK	0.96
VP30	FUBP3	0.97
VP35	PDLIM5	0.99
VP35	CGNL1	1
VP35	LTV1	1
VP30	TNRC6B	1
NP	UBAP2	1
NP	PEAK1	1
NP	PDLIM5	1
VP24	CACUL1	1
NP	CEP85L	1
NP	DNM2	0.99
VP24	GATAD2B	0.94
VP35	RC3H1	1
NP	SECISBP2	0.75
VP40	AARSD1	1
VP35	AMOT	1
NP	HLCS	0.96
NP	NFRKB	1
VP24	MAP7D3	1
VP35	TTK	1
VP35	LATS1	1
NP	SMG7	0.98
NP	RPL6	1
VP24	XRCC6	0.92
VP35	YTHDF2	0.98
VP35	YTHDF3	0.96
NP	CEP350	0.75
VP35	CNOT11	1
NP	OCRL	0.95
VP24	TAF9B	1
VP35	FUBP3	0.97
VP40	RPL7A	1
VP24	ICE2	1
NP	PCMT1	0.91
NP	BCCIP	1
VP24	VDAC2	1
VP35	TAGLN2	0.94
VP35	RC3H2	1
VP35	BCCIP	1
NP	CEP85	1
NP	SDCCAG3	1
VP35	USP54	1
NP	DZIP3	1
NP	RPS11	0.99
VP24	RPS11	0.99
NP	AP1G1	1
NP	SNAP29	1
NP	ACOT7	1
NP	CLTC	1
VP35	LSM14B	1
NP	TAB1	1
NP	DDX39B	0.99
NP	TUFM	0.97
VP35	IGF2BP3	1
NP	MIS18BP1	1
NP	SIPA1L2	1
VP24	TMEM263	1
NP	HBS1L	0.86
VP40	RASAL2	1
NP	TUBGCP3	1
VP35	CCDC138	0.75
VP40	PPP6R3	0.75
NP	ZC3H7A	1
VP35	B3KSV4	1
NP	LATS1	1
NP	ARHGEF16	1
VP24	JPH1	1
VP24	PTPN2	0.98
VP24	STRN	0.96
VP30	VIM	0.97
VP35	AGO2	1
VP30	HNRNPU	1
VP24	RPL5	1
NP	C6ORF132	1
VP24	DDX39B	0.98
VP24	IGF2BP2	0.95
VP35	TUFM	0.95
VP24	USP9X	1
NP	PRRC2B	0.91
NP	CEP170B	0.75
NP	EPS15L1	1
VP24	PABPC1	0.97
VP30	TMEM263	1
NP	TUBGCP4	1
NP	RPS15A	0.98
NP	MTHFD1	1
VP24	NUP62	0.98
VP24	TCP1	1
VP35	CEP55	0.98
VP24	TUFM	0.91
VP24	GTF2A1	1
VP24	MTA2	0.94
NP	USP53	1
VP35	ZNF598	0.97
NP	ARF3	0.96
NP	INPPL1	1
VP40	LNPEP	1
NP	MTUS1	0.75
VP30	SRPK2	1
NP	DIP2B	1
VP40	PDCD11	1
VP35	KIAA1462	1
NP	AARS	0.83
VP30	LARP4B	0.99
NP	LMO7	1
NP	CCDC85C	0.98
NP	RPL5	1
NP	YTHDC2	0.95
VP40	TBC1D15	0.97
NP	LRIF1	0.99
VP30	MPHOSPH9	1
VP24	PRMT7	1
VP35	CEP85	1
VP35	NFX1	1
NP	RPS2	1
VP40	RAB11FIP1	0.79
VP35	YTHDF1	1
VP24	RPS8	0.99
NP	USP54	1
VP24	AGO2	1
NP	KIAA0430	1
NP	MSN	1
NP	RACK1	1
NP	VARS	0.82
NP	AARSD1	1
VP40	IPO7	0.96
VP24	WASF1	1
VP40	EIF5A	1
NP	NFX1	1
VP40	PDLIM5	0.94
VP40	PIAS1	1
VP24	RPL7A	1
VP24	RPS6	0.94
VP35	GIGYF1	1
NP	CEP55	0.96
VP24	RPS15A	0.91
VP35	FAM193A	1
VP24	PIAS1	1
VP35	TXLNG	1
NP	(SEPT9)	1
VP35	ABLIM1	1
NP	GNE	1
NP	PPM1A	0.97
NP	SEPT	1
NP	TUFT1	1
L	HSPA8	0.5
VP40	PTPN14	1
VP24	EIF5A	1
VP40	RPS11	0.92
VP40	RPS15A	0.92
VP40	MON2	1
NP	RPS6	0.94
VP40	CCT3	1
VP40	FAM171A2	1
NP	RPL17	1
VP24	ACOT7	1
VP35	EPS15L1	1
NP	FAM83G	1
NP	RPS10	1
VP30	IGF2BP2	1
VP35	RPS15A	0.93
NP	HACD3	0.93
VP24	RPL15	0.95
VP24	TAF4	1
NP	HNRNPU	1
NP	RPL23	1
NP	FAM188B	1
NP	TAB3	1
VP35	HRB	0.89
NP	RPL4	1
NP	KIAA1191	1
VP30	PATL1	0.75
NP	RPL13A	1
NP	RPS8	0.99
NP	TMEM263	1
NP	HNRPAB	0.97
NP	POLR3D	1
NP	RPS27	1
NP	SCYL2	0.98
NP	RPL7A	1
NP	CPNE5	0.95
VP30	LARP4	1
VP35	RNF214	1
NP	RPS23	0.94
NP	SMG9	0.83
NP	SOS1	1
NP	TPT1	1
VP35	KIAA1191	1
VP40	PRMT7	1
NP	HAUS8	1
VP30	RPL24	0.89
NP	RPS12	1
VP24	SPDL1	1
VP35	MIB2	0.75
NP	RPS14	1
VP30	PDLIM5	0.84
VP24	PRDX3	0.98
NP	VDAC3	1
NP	ELAVL1	0.96
NP	RPS20	1
VP35	SEC24A	0.89
NP	SH3PXD2B	1
VP40	HN1	1
VP30	MAPT	1
NP	MTMR6	0.93
VP35	CCDC85C	0.79
VP24	LTV1	1
NP	TXLNG	1
NP	CAPZB	1
NP	LASP1	0.96
NP	RPS4X	1
VP40	SORT1	1
VP30	ABI2	1
VP40	LRIF1	0.92
NP	FAM117B	0.93
NP	SKA1	1
NP	C1ORF198	1
NP	COPB1	0.92
VP40	SET	0.96
VP35	SPATA2	1
VP24	RPL13A	1
VP24	BTF3	1
VP24	RPL23	0.98
NP	UPF1	0.9
VP30	RBMS1	1
NP	ABI2	1
VP35	SMAP1	0.87
NP	CKB	1
NP	PPP2R2A	1
VP24	RPL13	1
NP	SMAP1	0.87
NP	TRIP6	1
VP35	PRDX3	0.91
VP35	B3KQ71	0.87
VP35	CNOT10	0.75
NP	NMT1	1
VP35	PDLIM7	1
NP	SNX3	0.94
NP	RPL13	1
VP35	GPBP1	0.75
NP	RPS28	1
VP35	FAM193B	0.75
VP24	IPO9	1
NP	RPL18A	1
NP	TNFRSF1B	0.92
NP	KATNB1	0.99
VP24	RPL19	1
NP	RPL9	1
VP35	PRMT7	1
VP24	RPS2	1
VP24	VDAC3	1
NP	B3KM97	1
VP24	RPS25	1
NP	BTF3	0.92
VP24	EIF2S2	1
NP	SRSF3	0.99
VP40	UBAP1	1
NP	C16ORF70	1
NP	MIF	1
NP	PPP1R2P3	0.89
VP40	SLC38A2	1
NP	SUMO1	1
NP	Q59FI9	0.99
VP30	TCEB2	0.97
