# Supplementary material for: A protein-proximity screen reveals Ebola virus co-opts the mRNA decapping complex through the scaffold protein EDC4
Source: Research Square preprint supplement (doi:10.21203/rs.3.rs-3838220/v1), 2024-02-01
Supplement: Supplementary file 8 [file Extended data table 3.xlsx]

## Sheet: Sheet1
Virus Protein	Host Protein	Rescore
NP	AARSD1	0.5
VP40	AARSD1	0.5
NP	ABI2	0.5
VP30	ABI2	0.5
NP	ACOT7	0.5
VP24	ACOT7	0.5
VP30	AFDN	0.512821
VP40	AFDN	0.487179
VP24	AGO2	0.5
VP35	AGO2	0.5
NP	B3KSV4	0.5
VP35	B3KSV4	0.5
VP24	BCCIP	0.24812
NP	BCCIP	0.250627
VP35	BCCIP	0.250627
VP40	BCCIP	0.250627
NP	BRCA2	0.5
VP35	BRCA2	0.5
NP	BTF3	0.479167
VP24	BTF3	0.520833
NP	CCDC85C	0.553672
VP35	CCDC85C	0.446328
NP	CEP192	0.502513
VP35	CEP192	0.497487
NP	CEP55	0.494845
VP35	CEP55	0.505155
NP	CEP85	0.5
VP35	CEP85	0.5
NP	CGN	0.334448
VP30	CGN	0.334448
VP35	CGN	0.331104
NP	CGNL1	0.333333
VP30	CGNL1	0.333333
VP35	CGNL1	0.333333
NP	CNOT1	0.518325
VP24	CNOT1	0.481675
NP	CYLD	0.5
VP35	CYLD	0.5
NP	DDX39B	0.502538
VP24	DDX39B	0.497462
NP	DSP	0.475936
VP35	DSP	0.524064
VP24	EIF5A	0.5
VP40	EIF5A	0.5
NP	EPS15L1	0.5
VP35	EPS15L1	0.5
VP35	FAM21C	0.5
VP40	FAM21C	0.5
VP30	FUBP3	0.5
VP35	FUBP3	0.5
NP	HNRNPU	0.5
VP30	HNRNPU	0.5
VP35	IGF2BP2	0.338983
VP24	IGF2BP2	0.322034
VP30	IGF2BP2	0.338983
NP	KIAA0430	0.5
VP35	KIAA0430	0.5
NP	KIAA1191	0.5
VP35	KIAA1191	0.5
NP	KIAA1462	0.333333
VP30	KIAA1462	0.333333
VP35	KIAA1462	0.333333
NP	KIAA1671	0.5
VP35	KIAA1671	0.5
NP	KIF14	0.502513
VP35	KIF14	0.497487
NP	LATS1	0.5
VP35	LATS1	0.5
NP	LPP	0.507772
VP35	LPP	0.492228
NP	LRIF1	0.518325
VP40	LRIF1	0.481675
VP24	LTV1	0.5
VP35	LTV1	0.5
NP	MAP7D3	0.5
VP24	MAP7D3	0.5
VP30	MPHOSPH9	0.333333
NP	MPHOSPH9	0.333333
VP35	MPHOSPH9	0.333333
NP	NFX1	0.5
VP35	NFX1	0.5
VP30	PABPC1	0.507614
VP24	PABPC1	0.492386
VP35	PATL1	0.571429
VP30	PATL1	0.428571
NP	PDLIM5	0.265252
VP30	PDLIM5	0.222812
VP35	PDLIM5	0.262599
VP40	PDLIM5	0.249337
VP24	PIAS1	0.5
VP40	PIAS1	0.5
VP24	PRDX3	0.518519
VP35	PRDX3	0.481481
VP24	PRMT7	0.333333
VP35	PRMT7	0.333333
VP40	PRMT7	0.333333
NP	PRRC2B	0.481481
VP35	PRRC2B	0.518519
NP	RPL13	0.5
VP24	RPL13	0.5
NP	RPL13A	0.5
VP24	RPL13A	0.5
NP	RPL23	0.505051
VP24	RPL23	0.494949
NP	RPL5	0.5
VP24	RPL5	0.5
NP	RPL7A	0.333333
VP24	RPL7A	0.333333
VP40	RPL7A	0.333333
NP	RPS11	0.341379
VP24	RPS11	0.341379
VP40	RPS11	0.317241
NP	RPS15A	0.262032
VP24	RPS15A	0.243316
VP35	RPS15A	0.248663
VP40	RPS15A	0.245989
NP	RPS2	0.5
VP24	RPS2	0.5
NP	RPS6	0.5
VP24	RPS6	0.5
NP	RPS8	0.5
VP24	RPS8	0.5
NP	SIPA1L3	0.5
VP35	SIPA1L3	0.5
NP	SMAP1	0.5
VP35	SMAP1	0.5
VP35	SMG7	0.505051
NP	SMG7	0.494949
NP	TAB2	0.502513
VP35	TAB2	0.497487
NP	TJP1	0.20284
VP24	TJP1	0.194726
VP30	TJP1	0.200811
VP35	TJP1	0.20284
VP40	TJP1	0.198783
NP	TJP2	0.258486
VP30	TJP2	0.253264
VP35	TJP2	0.245431
VP40	TJP2	0.24282
NP	TMEM263	0.333333
VP24	TMEM263	0.333333
VP30	TMEM263	0.333333
VP35	TNRC6A	0.502513
VP24	TNRC6A	0.497487
NP	TNRC6B	0.33
VP30	TNRC6B	0.33
VP40	TNRC6B	0.33
NP	TNRC6C	0.5
VP35	TNRC6C	0.5
NP	TTK	0.5
VP35	TTK	0.5
NP	TUFM	0.342756
VP24	TUFM	0.321555
VP35	TUFM	0.335689
NP	TXLNG	0.5
VP35	TXLNG	0.5
NP	UBAP2	0.5
VP35	UBAP2	0.5
NP	UPF1	0.47619
VP35	UPF1	0.52381
NP	USP54	0.5
VP35	USP54	0.5
NP	VDAC3	0.5
VP24	VDAC3	0.5
NP	WDCP	0.502513
VP24	WDCP	0.497487
NP	YTHDC2	0.487179
VP35	YTHDC2	0.512821
VP35	ZMYM1	0.512821
NP	ZMYM1	0.487179
NP	(SEPT9)	1
NP	AARS	1
NP	ABL2	1
VP35	ABLIM1	1
NP	AHNAK	1
NP	AHNAK2	1
VP35	AMOT	1
NP	AP1G1	1
NP	ARF3	1
NP	ARHGAP29	1
NP	ARHGEF16	1
NP	ATP6V1A	1
VP35	ATXN2	1
NP	B3KM97	1
VP35	B3KQ71	1
NP	B6E4X6	1
NP	BACH1	1
NP	C16ORF70	1
NP	C1ORF198	1
NP	C6ORF132	1
VP24	CACUL1	1
NP	CAMSAP2	1
NP	CAMSAP3	1
NP	CAPZB	1
NP	CASC5	1
NP	CC2D1A	1
VP24	CCAR2	1
VP35	CCDC138	1
VP40	CCT3	1
NP	CD2AP	1
NP	CEP170B	1
NP	CEP350	1
NP	CEP85L	1
NP	CKAP5	1
NP	CKB	1
NP	CLTC	1
VP35	CNOT10	1
VP35	CNOT11	1
NP	COBL	1
NP	COPB1	1
NP	CP110	1
NP	CPNE5	1
VP24	CSE1L	1
NP	CSPP1	1
VP35	DCP1A	1
VP35	DCP1B	1
VP35	DCP2	1
VP35	DDX6	1
NP	DIP2B	1
NP	DNM2	1
VP40	DSG2	1
VP35	DYNLL1	1
VP35	DYNLL2	1
NP	DZIP3	1
VP35	EDC3	1
VP35	EDC4	1
NP	EGLN1	1
VP24	EIF2S2	1
VP35	EIF4ENIF1	1
NP	ELAVL1	1
VP40	EPB41	1
VP24	ESYT1	1
VP24	F4ZW65	1
NP	FAM117B	1
VP40	FAM171A2	1
NP	FAM188B	1
VP35	FAM193A	1
VP35	FAM193B	1
NP	FAM83G	1
VP40	FASN	1
NP	FLNA	1
NP	FXR1	1
VP35	GAS8	1
VP24	GATAD2B	1
NP	GEN1	1
VP35	GIGYF1	1
NP	GIT1	1
NP	GNE	1
VP35	GPBP1	1
VP40	GPSM1	1
VP24	GTF2A1	1
NP	HACD3	1
NP	HAUS8	1
NP	HBS1L	1
VP24	HDLBP	1
NP	HLCS	1
VP40	HN1	1
NP	HNRPAB	1
VP35	HRB	1
L	HSPA8	1
NP	HSPD1	1
NP	IBTK	1
VP24	ICE1	1
VP24	ICE2	1
NP	IFT74	1
VP35	IGF2BP1	1
VP35	IGF2BP3	1
NP	INPPL1	1
VP40	IPO7	1
VP24	IPO9	1
VP35	JCAD	1
VP24	JPH1	1
VP40	JUP	1
NP	KATNB1	1
NP	KIAA0368	1
NP	KIAA1217	1
NP	KNL1	1
VP24	KPNA1	1
VP24	KPNA2	1
VP24	KPNA5	1
VP24	KPNA6	1
VP30	LARP4	1
VP30	LARP4B	1
NP	LASP1	1
NP	LMO7	1
VP40	LNPEP	1
VP35	LSM14A	1
VP35	LSM14B	1
VP40	LTN1	1
NP	LUZP1	1
NP	MAP3K7	1
VP30	MAPT	1
VP24	MCM3AP	1
VP35	MEIOC	1
VP35	MIB2	1
NP	MIF	1
NP	MIS18BP1	1
VP40	MON2	1
NP	MSN	1
VP24	MTA2	1
NP	MTHFD1	1
NP	MTMR6	1
NP	MTUS1	1
NP	NAV1	1
NP	NBN	1
NP	NCKAP5L	1
NP	NCOA6	1
VP40	NECTIN2	1
NP	NEDD1	1
NP	NFRKB	1
VP24	NIFK	1
NP	NMT1	1
VP40	NOTCH2	1
NP	NPAT	1
VP24	NUP214	1
VP24	NUP62	1
NP	OCRL	1
VP24	OSBPL8	1
VP30	PABPC4	1
NP	PALLD	1
NP	PCMT1	1
VP40	PDCD11	1
VP35	PDLIM7	1
NP	PEAK1	1
NP	PIK3C2A	1
NP	PLEKHG1	1
NP	POC5	1
VP24	POLR3C	1
NP	POLR3D	1
VP24	POM121	1
VP24	POM121C	1
NP	PPM1A	1
VP40	PPM1B	1
NP	PPP1R2P3	1
NP	PPP2R2A	1
NP	PPP2R5C	1
NP	PPP2R5D	1
VP40	PPP6R3	1
VP35	PRRC2A	1
VP40	PTPN14	1
VP24	PTPN2	1
NP	Q59FI9	1
VP40	RAB11FIP1	1
NP	RACK1	1
VP40	RASAL2	1
NP	RBBP4	1
VP30	RBBP6	1
NP	RBBP7	1
VP30	RBMS1	1
VP35	RC3H1	1
VP35	RC3H2	1
VP35	RNF214	1
NP	RNF219	1
VP24	RPL15	1
NP	RPL17	1
NP	RPL18A	1
VP24	RPL19	1
VP30	RPL24	1
NP	RPL4	1
NP	RPL6	1
NP	RPL9	1
NP	RPS10	1
NP	RPS12	1
NP	RPS14	1
NP	RPS20	1
NP	RPS23	1
VP24	RPS25	1
NP	RPS27	1
NP	RPS27A	1
NP	RPS28	1
NP	RPS4X	1
NP	SCYL2	1
NP	SDCCAG3	1
VP40	SEC16A	1
VP35	SEC24A	1
NP	SECISBP2	1
NP	SEPT	1
VP40	SET	1
NP	SH3PXD2B	1
NP	SIPA1L1	1
NP	SIPA1L2	1
NP	SKA1	1
NP	SKA3	1
VP40	SLC38A2	1
VP40	SMCR8	1
NP	SMG9	1
NP	SNAP29	1
NP	SND1	1
NP	SNX3	1
VP40	SORT1	1
NP	SOS1	1
VP35	SPATA2	1
VP24	SPDL1	1
VP30	SRPK2	1
NP	SRSF3	1
VP35	STAU1	1
VP24	STRN	1
NP	SUMO1	1
NP	SVIL	1
NP	SYNJ2	1
NP	TAB1	1
NP	TAB3	1
VP24	TAF1	1
VP24	TAF4	1
VP24	TAF9	1
VP24	TAF9B	1
VP35	TAGLN2	1
NP	TANC1	1
VP40	TBC1D15	1
VP30	TCEB2	1
VP24	TCERG1	1
VP24	TCP1	1
NP	TNFRSF1B	1
VP24	TOP2A	1
NP	TP53	1
NP	TPT1	1
NP	TRIM25	1
NP	TRIP6	1
NP	TRPS1	1
NP	TTF2	1
NP	TUBGCP2	1
NP	TUBGCP3	1
NP	TUBGCP4	1
NP	TUFT1	1
VP40	UBAP1	1
NP	UBN2	1
NP	USP53	1
VP40	USP6NL	1
VP24	USP9X	1
NP	VARS	1
VP24	VDAC2	1
VP30	VIM	1
VP24	WASF1	1
VP24	WASF2	1
VP24	WDR12	1
VP30	WIPF2	1
VP24	XRCC6	1
VP35	XRN1	1
VP30	YEATS2	1
VP35	YTHDF1	1
VP35	YTHDF2	1
VP35	YTHDF3	1
VP30	YWHAE/FAM22A	1
NP	ZC3H7A	1
VP35	ZC3HAV1	1
NP	ZNF507	1
VP35	ZNF598	1
