# Supplementary material for: A protein-proximity screen reveals Ebola virus co-opts the mRNA decapping complex through the scaffold protein EDC4
Source: Research Square preprint supplement (doi:10.21203/rs.3.rs-3838220/v1), 2024-02-01
Supplement: Supplementary file 11 [file Extended data table 4.xlsx]

## Sheet: Sheet1
Cluster	Adjusted P-value
12	8.36215e-19
17	1.22742e-18
10	5.5767e-18
2	1.61458e-12
19	1.36603e-10
18	3.97539e-10
15	6.66472e-10
14	7.50303e-09
11	1.40185e-08
9	1.97319e-08
16	3.0273e-08
6	5.77146e-08
4	4.17793e-07
3	6.32588e-07
5	0.000213747
7	0.000378423
13	0.000538381
8	0.00597397
1	0.0139374

## Sheet: Cluster1
	Term	Overlap	P.value	Adjusted.P.value	Old.P.value	Old.Adjusted.P.value	Odds.Ratio	Combined.Score	Genes
179	SUMOylation Of DNA Replication Proteins R-HSA-4615885	2/45	0.000176423	0.0139374	0	0	132.545	1145.54	TOP2A;SUMO1
1	Positive Regulation Of Cellular Component Organization (GO:0051130)	2/113	0.00110993	0.0223317	0	0	51.1712	348.141	AHNAK;SUMO1
180	Cell Cycle, Mitotic R-HSA-69278	3/523	0.0013277	0.0304405	0	0	18.7221	124.021	TOP2A;SUMO1;SPDL1
2	Medium-Chain Fatty Acid Biosynthetic Process (GO:0051792)	1/5	0.00224816	0.0223317	0	0	624.594	3808.55	ACOT7
3	fatty-acyl-CoA Catabolic Process (GO:0036115)	1/5	0.00224816	0.0223317	0	0	624.594	3808.55	ACOT7
124	Nuclear Stress Granule (GO:0097165)	1/5	0.00224816	0.0449632	0	0	624.594	3808.55	SUMO1
144	deSUMOylase Activity (GO:0016929)	1/5	0.00224816	0.0313802	0	0	624.594	3808.55	SUMO1
181	SUMO Is Proteolytically Processed R-HSA-3065679	1/5	0.00224816	0.0304405	0	0	624.594	3808.55	SUMO1
182	SUMO E3 Ligases SUMOylate Target Proteins R-HSA-3108232	2/168	0.0024291	0.0304405	0	0	34.1222	205.424	TOP2A;SUMO1
183	Cell Cycle R-HSA-1640170	3/654	0.00252255	0.0304405	0	0	14.8541	88.8642	TOP2A;SUMO1;SPDL1
184	SUMOylation R-HSA-2990846	2/174	0.00260259	0.0304405	0	0	32.9219	195.927	TOP2A;SUMO1
185	SUMO Is Transferred From E1 To E2 (UBE2I, UBC9) R-HSA-3065678	1/6	0.00269726	0.0304405	0	0	499.65	2955.69	SUMO1
4	Protein Desumoylation (GO:0016926)	1/7	0.00314617	0.0223317	0	0	416.354	2398.85	SUMO1
5	Sulfur Amino Acid Biosynthetic Process (GO:0000097)	1/7	0.00314617	0.0223317	0	0	416.354	2398.85	MTHFD1
6	DNA Ligation (GO:0006266)	1/7	0.00314617	0.0223317	0	0	416.354	2398.85	TOP2A
7	Methionine Metabolic Process (GO:0006555)	1/7	0.00314617	0.0223317	0	0	416.354	2398.85	MTHFD1
8	Aspartate Family Amino Acid Biosynthetic Process (GO:0009067)	1/7	0.00314617	0.0223317	0	0	416.354	2398.85	MTHFD1
9	Somite Development (GO:0061053)	1/8	0.00359491	0.0223317	0	0	356.857	2008.48	MTHFD1
10	DNA Topological Change (GO:0006265)	1/8	0.00359491	0.0223317	0	0	356.857	2008.48	TOP2A
11	Negative Regulation Of Chromosome Organization (GO:2001251)	1/8	0.00359491	0.0223317	0	0	356.857	2008.48	TOP2A
12	Negative Regulation Of Protein Import Into Nucleus (GO:0042308)	1/8	0.00359491	0.0223317	0	0	356.857	2008.48	SUMO1
13	Positive Regulation Of RNA Biosynthetic Process (GO:1902680)	1/9	0.00404347	0.0223317	0	0	312.234	1720.62	TOP2A
14	Amino Sugar Metabolic Process (GO:0006040)	1/9	0.00404347	0.0223317	0	0	312.234	1720.62	GNE
15	Dicarboxylic Acid Biosynthetic Process (GO:0043650)	1/9	0.00404347	0.0223317	0	0	312.234	1720.62	MTHFD1
16	Negative Regulation Of Delayed Rectifier Potassium Channel Activity (GO:1902260)	1/9	0.00404347	0.0223317	0	0	312.234	1720.62	SUMO1
186	Processing And Activation Of SUMO R-HSA-3215018	1/9	0.00404347	0.0325219	0	0	312.234	1720.62	SUMO1
17	Coenzyme A Biosynthetic Process (GO:0015937)	1/10	0.00449184	0.0223317	0	0	277.528	1500.17	ACOT7
18	Alpha-Amino Acid Biosynthetic Process (GO:1901607)	1/10	0.00449184	0.0223317	0	0	277.528	1500.17	MTHFD1
19	Protein Localization To Condensed Chromosome (GO:1903083)	1/10	0.00449184	0.0223317	0	0	277.528	1500.17	SPDL1
20	Ribonucleoside Bisphosphate Biosynthetic Process (GO:0034030)	1/10	0.00449184	0.0223317	0	0	277.528	1500.17	ACOT7
21	N-acetylneuraminate Metabolic Process (GO:0006054)	1/10	0.00449184	0.0223317	0	0	277.528	1500.17	GNE
22	Purine Nucleoside Bisphosphate Biosynthetic Process (GO:0034033)	1/10	0.00449184	0.0223317	0	0	277.528	1500.17	ACOT7
23	Serine Family Amino Acid Biosynthetic Process (GO:0009070)	1/10	0.00449184	0.0223317	0	0	277.528	1500.17	MTHFD1
145	Racemase And Epimerase Activity, Acting On Carbohydrates And Derivatives (GO:0016857)	1/10	0.00449184	0.0313802	0	0	277.528	1500.17	GNE
187	Negative Regulation Of Activity Of TFAP2 (AP-2) Family Transcription Factors R-HSA-8866904	1/10	0.00449184	0.0325219	0	0	277.528	1500.17	SUMO1
188	Mitotic Anaphase R-HSA-68882	2/232	0.00457114	0.0325219	0	0	24.5478	132.264	SUMO1;SPDL1
189	Mitotic Metaphase And Anaphase R-HSA-2555396	2/233	0.00460964	0.0325219	0	0	24.4403	131.479	SUMO1;SPDL1
24	Protein Localization To Kinetochore (GO:0034501)	1/11	0.00494004	0.0223317	0	0	249.762	1326.33	SPDL1
25	Negative Regulation Of Voltage-Gated Potassium Channel Activity (GO:1903817)	1/11	0.00494004	0.0223317	0	0	249.762	1326.33	SUMO1
26	Tetrahydrofolate Metabolic Process (GO:0046653)	1/11	0.00494004	0.0223317	0	0	249.762	1326.33	MTHFD1
146	Carbohydrate Kinase Activity (GO:0019200)	1/11	0.00494004	0.0313802	0	0	249.762	1326.33	GNE
190	SUMOylation Of Immune Response Proteins R-HSA-4755510	1/11	0.00494004	0.0325219	0	0	249.762	1326.33	SUMO1
27	DNA Conformation Change (GO:0071103)	1/12	0.00538806	0.0223317	0	0	227.045	1185.99	TOP2A
28	Aspartate Family Amino Acid Metabolic Process (GO:0009066)	1/12	0.00538806	0.0223317	0	0	227.045	1185.99	MTHFD1
191	Maturation Of Nucleoprotein R-HSA-9683610	1/12	0.00538806	0.0327428	0	0	227.045	1185.99	SUMO1
147	Oxidoreductase Activity, Acting On The CH-NH Group Of Donors, NAD Or NADP As Acceptor (GO:0016646)	1/13	0.0058359	0.0313802	0	0	208.115	1070.48	MTHFD1
148	fatty-acyl-CoA Binding (GO:0000062)	1/13	0.0058359	0.0313802	0	0	208.115	1070.48	ACOT7
29	Resolution Of Meiotic Recombination Intermediates (GO:0000712)	1/14	0.00628356	0.0223317	0	0	192.096	973.893	TOP2A
30	Medium-Chain Fatty Acid Metabolic Process (GO:0051791)	1/14	0.00628356	0.0223317	0	0	192.096	973.893	ACOT7
31	Embryonic Cranial Skeleton Morphogenesis (GO:0048701)	1/14	0.00628356	0.0223317	0	0	192.096	973.893	MTHFD1
32	Negative Regulation Of Nucleocytoplasmic Transport (GO:0046823)	1/14	0.00628356	0.0223317	0	0	192.096	973.893	SUMO1
33	Serine Family Amino Acid Metabolic Process (GO:0009069)	1/14	0.00628356	0.0223317	0	0	192.096	973.893	MTHFD1
192	Regulation Of IFNG Signaling R-HSA-877312	1/14	0.00628356	0.0354219	0	0	192.096	973.893	SUMO1
34	Coenzyme A Metabolic Process (GO:0015936)	1/15	0.00673105	0.0223317	0	0	178.366	892.013	ACOT7
193	Diseases Associated With Glycosylation Precursor Biosynthesis R-HSA-5609975	1/15	0.00673105	0.0354219	0	0	178.366	892.013	GNE
35	DNA Metabolic Process (GO:0006259)	2/288	0.00695844	0.0223317	0	0	19.6853	97.7927	TOP2A;SUMO1
36	Apoptotic Nuclear Changes (GO:0030262)	1/16	0.00717835	0.0223317	0	0	166.467	821.794	TOP2A
37	Nuclear Chromosome Segregation (GO:0098813)	1/16	0.00717835	0.0223317	0	0	166.467	821.794	TOP2A
194	SUMOylation Of DNA Methylation Proteins R-HSA-4655427	1/16	0.00717835	0.0354219	0	0	166.467	821.794	SUMO1
38	Sulfur Amino Acid Metabolic Process (GO:0000096)	1/17	0.00762547	0.0223317	0	0	156.055	760.963	MTHFD1
39	Regulation Of Delayed Rectifier Potassium Channel Activity (GO:1902259)	1/17	0.00762547	0.0223317	0	0	156.055	760.963	SUMO1
40	Regulation Of Single Stranded Viral RNA Replication Via Double Stranded DNA Intermediate (GO:0045091)	1/17	0.00762547	0.0223317	0	0	156.055	760.963	TOP2A
41	Purine-Containing Compound Biosynthetic Process (GO:0072522)	1/17	0.00762547	0.0223317	0	0	156.055	760.963	MTHFD1
42	Regulation Of Cartilage Development (GO:0061035)	1/17	0.00762547	0.0223317	0	0	156.055	760.963	TRPS1
149	DNA Binding, Bending (GO:0008301)	1/17	0.00762547	0.0313802	0	0	156.055	760.963	TOP2A
195	Metabolism Of Folate And Pterines R-HSA-196757	1/17	0.00762547	0.0354219	0	0	156.055	760.963	MTHFD1
43	Protein Localization To Chromosome, Centromeric Region (GO:0071459)	1/18	0.00807242	0.0230909	0	0	146.868	707.8	SPDL1
44	Nucleotide Biosynthetic Process (GO:0009165)	1/19	0.00851919	0.023815	0	0	138.701	660.972	MTHFD1
196	Transcription Of E2F Targets Under Negative Control By DREAM Complex R-HSA-1362277	1/19	0.00851919	0.0354219	0	0	138.701	660.972	TOP2A
197	SUMOylation Of Transcription Factors R-HSA-3232118	1/19	0.00851919	0.0354219	0	0	138.701	660.972	SUMO1
150	acyl-CoA Hydrolase Activity (GO:0047617)	1/20	0.00896577	0.0313802	0	0	131.395	619.44	ACOT7
151	Ubiquitin-Specific Protease Binding (GO:1990381)	1/20	0.00896577	0.0313802	0	0	131.395	619.44	SUMO1
172	One carbon pool by folate	1/20	0.00896577	0.0282027	0	0	131.395	619.44	MTHFD1
45	Response To Cadmium Ion (GO:0046686)	1/21	0.00941218	0.0251674	0	0	124.819	582.373	SUMO1
46	Purine Nucleotide Biosynthetic Process (GO:0006164)	1/21	0.00941218	0.0251674	0	0	124.819	582.373	MTHFD1
47	Cellular Response To Cadmium Ion (GO:0071276)	1/22	0.00985841	0.0252622	0	0	118.869	549.107	SUMO1
48	Negative Regulation Of Protein Localization To Nucleus (GO:1900181)	1/22	0.00985841	0.0252622	0	0	118.869	549.107	SUMO1
49	Regulation Of Chondrocyte Differentiation (GO:0032330)	1/25	0.011196	0.0264829	0	0	103.995	467.165	TRPS1
50	Negative Regulation Of Intracellular Protein Transport (GO:0090317)	1/25	0.011196	0.0264829	0	0	103.995	467.165	SUMO1
51	Ribonucleoside Bisphosphate Metabolic Process (GO:0033875)	1/25	0.011196	0.0264829	0	0	103.995	467.165	ACOT7
52	Purine Nucleoside Bisphosphate Metabolic Process (GO:0034032)	1/25	0.011196	0.0264829	0	0	103.995	467.165	ACOT7
198	M Phase R-HSA-68886	2/380	0.0118662	0.0434029	0	0	14.8246	65.7333	SUMO1;SPDL1
173	Biosynthesis of unsaturated fatty acids	1/27	0.0120869	0.0282027	0	0	95.9856	423.837	ACOT7
174	Fatty acid elongation	1/27	0.0120869	0.0282027	0	0	95.9856	423.837	ACOT7
199	G0 And Early G1 R-HSA-1538133	1/27	0.0120869	0.0434029	0	0	95.9856	423.837	TOP2A
200	Postmitotic Nuclear Pore Complex (NPC) Reformation R-HSA-9615933	1/27	0.0120869	0.0434029	0	0	95.9856	423.837	SUMO1
53	DNA Damage Response (GO:0006974)	2/384	0.0121064	0.0270538	0	0	14.6664	64.7379	TOP2A;SUMO1
54	Primary Neural Tube Formation (GO:0014020)	1/28	0.012532	0.0270538	0	0	92.4259	404.776	MTHFD1
55	Establishment Of Mitotic Spindle Orientation (GO:0000132)	1/29	0.012977	0.0270538	0	0	89.1205	387.191	SPDL1
56	Alpha-Amino Acid Metabolic Process (GO:1901605)	1/29	0.012977	0.0270538	0	0	89.1205	387.191	MTHFD1
57	Negative Regulation Of DNA Binding (GO:0043392)	1/29	0.012977	0.0270538	0	0	89.1205	387.191	SUMO1
58	Tube Closure (GO:0060606)	1/29	0.012977	0.0270538	0	0	89.1205	387.191	MTHFD1
59	Positive Regulation Of Viral Genome Replication (GO:0045070)	1/29	0.012977	0.0270538	0	0	89.1205	387.191	TOP2A
201	SUMOylation Of Intracellular Receptors R-HSA-4090294	1/29	0.012977	0.0441802	0	0	89.1205	387.191	SUMO1
202	Translation Of Structural Proteins R-HSA-9683701	1/30	0.0134218	0.0441802	0	0	86.0431	370.921	SUMO1
60	acyl-CoA Metabolic Process (GO:0006637)	1/31	0.0138665	0.0279031	0	0	83.1708	355.828	ACOT7
61	Chromosome Condensation (GO:0030261)	1/32	0.0143109	0.0279031	0	0	80.4839	341.794	TOP2A
62	Neural Tube Closure (GO:0001843)	1/32	0.0143109	0.0279031	0	0	80.4839	341.794	MTHFD1
63	Regulation Of Calcium Ion Transmembrane Transporter Activity (GO:1901019)	1/32	0.0143109	0.0279031	0	0	80.4839	341.794	AHNAK
152	Ubiquitin-Like Protein Peptidase Activity (GO:0019783)	1/32	0.0143109	0.0445228	0	0	80.4839	341.794	SUMO1
64	Carboxylic Acid Metabolic Process (GO:0019752)	1/33	0.0147552	0.0279031	0	0	77.9648	328.712	GNE
203	Sialic Acid Metabolism R-HSA-4085001	1/33	0.0147552	0.0453881	0	0	77.9648	328.712	GNE
65	Establishment Of Mitotic Spindle Localization (GO:0040001)	1/34	0.0151993	0.0279031	0	0	75.5985	316.494	SPDL1
66	Purine Nucleotide Metabolic Process (GO:0006163)	1/34	0.0151993	0.0279031	0	0	75.5985	316.494	MTHFD1
67	Sister Chromatid Segregation (GO:0000819)	1/34	0.0151993	0.0279031	0	0	75.5985	316.494	TOP2A
68	Establishment Of Spindle Orientation (GO:0051294)	1/35	0.0156432	0.0282957	0	0	73.3713	305.057	SPDL1
204	SUMOylation Of SUMOylation Proteins R-HSA-4085377	1/35	0.0156432	0.0453881	0	0	73.3713	305.057	SUMO1
69	Protein Destabilization (GO:0031648)	1/36	0.0160869	0.0286767	0	0	71.2714	294.333	SUMO1
153	Protein Kinase C Binding (GO:0005080)	1/36	0.0160869	0.0450433	0	0	71.2714	294.333	TOP2A
205	Mitochondrial Fatty Acid Beta-Oxidation R-HSA-77289	1/36	0.0160869	0.0453881	0	0	71.2714	294.333	ACOT7
206	Transcriptional Regulation By AP-2 (TFAP2) Family Of Transcription Factors R-HSA-8864260	1/36	0.0160869	0.0453881	0	0	71.2714	294.333	SUMO1
70	Regulation Of Protein Import Into Nucleus (GO:0042306)	1/38	0.0169738	0.0298255	0	0	67.4122	274.777	SUMO1
207	SUMOylation Of Ubiquitinylation Proteins R-HSA-3232142	1/39	0.017417	0.0474464	0	0	65.6349	265.841	SUMO1
71	Cellular Response To Heat (GO:0034605)	1/40	0.0178601	0.0309407	0	0	63.9487	257.406	SUMO1
208	Formation Of Incision Complex In GG-NER R-HSA-5696395	1/42	0.0187456	0.0488987	0	0	60.8232	241.881	SUMO1
209	SUMOylation Of Transcription Cofactors R-HSA-3899300	1/43	0.0191881	0.0488987	0	0	59.372	234.725	SUMO1
72	Chromosome Organization (GO:0051276)	1/45	0.0200725	0.0342906	0	0	56.6676	221.48	TOP2A
154	Potassium Channel Regulator Activity (GO:0015459)	1/45	0.0200725	0.0497588	0	0	56.6676	221.48	SUMO1
210	Post-translational Protein Modification R-HSA-597592	3/1383	0.0202111	0.0498962	0	0	6.74312	26.3084	TOP2A;SUMO1;GNE
73	Protein Sumoylation (GO:0016925)	1/46	0.0205145	0.0345655	0	0	55.4056	215.341	SUMO1
125	Cell-Cell Contact Zone (GO:0044291)	1/47	0.0209563	0.151947	0	0	54.1984	209.494	AHNAK
211	SUMOylation Of RNA Binding Proteins R-HSA-4570464	1/47	0.0209563	0.050168	0	0	54.1984	209.494	SUMO1
155	RNA Binding (GO:0003723)	3/1411	0.0213252	0.0497588	0	0	6.59908	25.3924	TOP2A;AHNAK;SUMO1
74	Regulation Of DNA Binding (GO:0051101)	1/48	0.0213979	0.0355667	0	0	53.0426	203.92	SUMO1
175	Amino sugar and nucleotide sugar metabolism	1/48	0.0213979	0.0374463	0	0	53.0426	203.92	GNE
75	Mitotic Metaphase Plate Congression (GO:0007080)	1/50	0.0222806	0.0365401	0	0	50.8724	193.521	SPDL1
76	Metaphase Plate Congression (GO:0051310)	1/51	0.0227216	0.0367732	0	0	49.8525	188.664	SPDL1
212	SARS-CoV-1 Infection R-HSA-9678108	1/52	0.0231625	0.0538188	0	0	48.8725	184.016	SUMO1
77	Negative Regulation Of Protein Modification By Small Protein Conjugation Or Removal (GO:1903321)	1/54	0.0240438	0.0379152	0	0	47.0236	175.298	SUMO1
78	Negative Regulation Of Protein Ubiquitination (GO:0031397)	1/54	0.0240438	0.0379152	0	0	47.0236	175.298	SUMO1
79	Purine Ribonucleotide Biosynthetic Process (GO:0009152)	1/55	0.0244842	0.0381209	0	0	46.1505	171.206	ACOT7
80	Regulation Of Cation Channel Activity (GO:2001257)	1/56	0.0249244	0.0383212	0	0	45.3091	167.277	AHNAK
213	SUMOylation Of Chromatin Organization Proteins R-HSA-4551638	1/57	0.0253644	0.0563866	0	0	44.4978	163.503	SUMO1
214	Late SARS-CoV-2 Infection Events R-HSA-9772573	1/58	0.0258042	0.0563866	0	0	43.7149	159.875	SUMO1
215	Recruitment And ATM-mediated Phosphorylation Of Repair And Signal Proteins At DNA Double Strand Breaks R-HSA-5693565	1/60	0.0266834	0.0563866	0	0	42.2288	153.025	SUMO1
216	DNA Double Strand Break Response R-HSA-5693606	1/61	0.0271227	0.0563866	0	0	41.5229	149.789	SUMO1
81	Fat Cell Differentiation (GO:0045444)	1/62	0.0275618	0.0418531	0	0	40.8402	146.67	SUMO1
217	Synthesis Of Substrates In N-glycan Biosythesis R-HSA-446219	1/63	0.0280008	0.0567195	0	0	40.1794	143.663	GNE
82	Fatty Acid Biosynthetic Process (GO:0006633)	1/65	0.0288781	0.0433172	0	0	38.9199	137.958	ACOT7
126	Nucleus (GO:0005634)	5/4487	0.0315539	0.151947	0	0	4.32536	14.9487	TOP2A;AHNAK;SUMO1;TRPS1;SPDL1
83	Regulation Of Cellular Localization (GO:0060341)	1/72	0.0319434	0.0473379	0	0	35.0704	120.775	SUMO1
218	Nuclear Envelope (NE) Reassembly R-HSA-2995410	1/75	0.0332545	0.0641925	0	0	33.6436	114.508	SUMO1
219	SUMOylation Of DNA Damage Response And Repair Proteins R-HSA-3108214	1/76	0.0336912	0.0641925	0	0	33.1933	112.543	SUMO1
156	Protein Homodimerization Activity (GO:0042803)	2/662	0.0337489	0.0661474	0	0	8.3684	28.3589	TOP2A;ACOT7
157	Phosphotransferase Activity, Alcohol Group As Acceptor (GO:0016773)	1/77	0.0341277	0.0661474	0	0	32.7549	110.635	GNE
220	Biosynthesis Of N-glycan Precursor (Dolichol LLO) And Transfer To Protein R-HSA-446193	1/77	0.0341277	0.0641925	0	0	32.7549	110.635	GNE
84	Positive Regulation Of Protein Modification By Small Protein Conjugation Or Removal (GO:1903322)	1/79	0.0350001	0.0512502	0	0	31.9119	106.981	SUMO1
158	Ubiquitin Binding (GO:0043130)	1/80	0.0354361	0.0661474	0	0	31.5063	105.232	TOP2A
221	Global Genome Nucleotide Excision Repair (GG-NER) R-HSA-5696399	1/82	0.0363075	0.0667045	0	0	30.7253	101.877	SUMO1
85	Positive Regulation Of Proteasomal Ubiquitin-Dependent Protein Catabolic Process (GO:0032436)	1/83	0.036743	0.0519651	0	0	30.3491	100.268	SUMO1
86	Positive Regulation Of Ubiquitin-Dependent Protein Catabolic Process (GO:2000060)	1/83	0.036743	0.0519651	0	0	30.3491	100.268	SUMO1
87	Positive Regulation Of Protein Ubiquitination (GO:0031398)	1/84	0.0371782	0.0519651	0	0	29.9819	98.7014	SUMO1
88	Purine Ribonucleotide Metabolic Process (GO:0009150)	1/84	0.0371782	0.0519651	0	0	29.9819	98.7014	ACOT7
89	Negative Regulation Of Binding (GO:0051100)	1/86	0.0380483	0.0525836	0	0	29.2735	95.6922	SUMO1
222	Interferon Gamma Signaling R-HSA-877300	1/89	0.039352	0.0706547	0	0	28.2713	91.4636	SUMO1
90	Positive Regulation Of Proteasomal Protein Catabolic Process (GO:1901800)	1/90	0.0397862	0.0543636	0	0	27.9522	90.1246	SUMO1
91	Regulation Of RNA Metabolic Process (GO:0051252)	1/91	0.0402203	0.0543636	0	0	27.6403	88.8188	AHNAK
92	Positive Regulation Of Cellular Component Biogenesis (GO:0044089)	1/93	0.0410878	0.0549153	0	0	27.0367	86.3023	SUMO1
223	Unattached Kinetochores Signal Amplification Via A MAD2 Inhibitory Signal R-HSA-141444	1/93	0.0410878	0.072132	0	0	27.0367	86.3023	SPDL1
93	Peptidyl-Lysine Modification (GO:0018205)	1/94	0.0415214	0.0549153	0	0	26.7446	85.0893	SUMO1
127	Nuclear Chromosome (GO:0000228)	1/95	0.0419547	0.151947	0	0	26.4588	83.9051	TOP2A
94	Regulation Of Protein Localization (GO:0032880)	1/97	0.0428209	0.0560022	0	0	25.9049	81.6195	SUMO1
224	EML4 And NUDC In Mitotic Spindle Formation R-HSA-9648025	1/97	0.0428209	0.0735402	0	0	25.9049	81.6195	SPDL1
95	Positive Regulation Of Protein-Containing Complex Assembly (GO:0031334)	1/98	0.0432537	0.0560022	0	0	25.6366	80.5162	SUMO1
128	Nucleolus (GO:0005730)	2/771	0.0446316	0.151947	0	0	7.14174	22.2059	TOP2A;SUMO1
96	Regulation Of RNA Splicing (GO:0043484)	1/102	0.0449833	0.0576348	0	0	24.6163	76.3467	AHNAK
129	Nuclear Lumen (GO:0031981)	2/780	0.045584	0.151947	0	0	7.05582	21.7898	TOP2A;SUMO1
225	Metabolism Of Proteins R-HSA-392499	3/1890	0.0458386	0.0765259	0	0	4.79703	14.7875	TOP2A;SUMO1;GNE
226	Resolution Of Sister Chromatid Cohesion R-HSA-2500257	1/106	0.0467101	0.0765259	0	0	23.6738	72.5317	SPDL1
227	Nucleotide Excision Repair R-HSA-5696398	1/108	0.0475724	0.0765259	0	0	23.229	70.7439	SUMO1
97	Regulation Of Proteasomal Ubiquitin-Dependent Protein Catabolic Process (GO:0032434)	1/109	0.0480034	0.0602491	0	0	23.0127	69.8778	SUMO1
98	Regulation Of Wnt Signaling Pathway (GO:0030111)	1/109	0.0480034	0.0602491	0	0	23.0127	69.8778	SUMO1
228	Mitotic Spindle Checkpoint R-HSA-69618	1/110	0.0484341	0.0765259	0	0	22.8005	69.0296	SPDL1
99	Mitotic Sister Chromatid Segregation (GO:0000070)	1/111	0.0488647	0.0607107	0	0	22.592	68.1986	SPDL1
100	Regulation Of Protein Ubiquitination (GO:0031396)	1/113	0.0497253	0.0610803	0	0	22.1864	66.5867	SUMO1
101	Protein Modification By Small Protein Removal (GO:0070646)	1/114	0.0501554	0.0610803	0	0	21.9889	65.8048	SUMO1
102	Regulation Of Protein-Containing Complex Assembly (GO:0043254)	1/119	0.052303	0.0630713	0	0	21.0519	62.1179	SUMO1
229	RHO GTPases Activate Formins R-HSA-5663220	1/119	0.052303	0.0810184	0	0	21.0519	62.1179	SPDL1
230	Metabolism Of Water-Soluble Vitamins And Cofactors R-HSA-196849	1/122	0.0535895	0.0814149	0	0	20.5269	60.0698	MTHFD1
159	Protease Binding (GO:0002020)	1/125	0.0548745	0.0960304	0	0	20.0272	58.1331	SUMO1
130	Intracellular Membrane-Bounded Organelle (GO:0043231)	5/5175	0.0560206	0.160059	0	0	3.58341	10.3275	TOP2A;AHNAK;SUMO1;TRPS1;SPDL1
103	Circulatory System Development (GO:0072359)	1/132	0.0578668	0.069103	0	0	18.9504	54.0012	MTHFD1
104	Cellular Response To Metal Ion (GO:0071248)	1/135	0.0591466	0.0699522	0	0	18.5233	52.3791	SUMO1
176	Fluid shear stress and atherosclerosis	1/139	0.0608506	0.0851908	0	0	17.9828	50.3398	SUMO1
231	Diseases Of Glycosylation R-HSA-3781865	1/143	0.0625519	0.0932377	0	0	17.4727	48.4301	GNE
160	Cysteine-Type Peptidase Activity (GO:0008234)	1/144	0.0629767	0.103726	0	0	17.3497	47.9716	SUMO1
232	Mitotic G1 Phase And G1/S Transition R-HSA-453279	1/147	0.0642504	0.0935053	0	0	16.9906	46.6386	TOP2A
105	Negative Regulation Of DNA-binding Transcription Factor Activity (GO:0043433)	1/149	0.0650986	0.075539	0	0	16.7593	45.7839	SUMO1
106	Skeletal System Development (GO:0001501)	1/149	0.0650986	0.075539	0	0	16.7593	45.7839	TRPS1
233	DNA Double-Strand Break Repair R-HSA-5693532	1/149	0.0650986	0.0935053	0	0	16.7593	45.7839	SUMO1
107	Epithelium Development (GO:0060429)	1/154	0.0672162	0.0772673	0	0	16.2075	43.7577	MTHFD1
161	Magnesium Ion Binding (GO:0000287)	1/155	0.0676392	0.105217	0	0	16.1015	43.3704	TOP2A
131	Chromosome (GO:0005694)	1/164	0.0714387	0.16343	0	0	15.2055	40.1261	TOP2A
132	Membrane Raft (GO:0045121)	1/169	0.0735435	0.16343	0	0	14.7493	38.4938	AHNAK
234	Separation Of Sister Chromatids R-HSA-2467813	1/170	0.0739639	0.104258	0	0	14.6612	38.1805	SPDL1
108	Negative Regulation Of DNA-templated Transcription (GO:0045892)	2/1025	0.0743405	0.0839382	0	0	5.29758	13.7689	SUMO1;TRPS1
109	Heart Development (GO:0007507)	1/171	0.0743842	0.0839382	0	0	14.5743	37.8714	MTHFD1
235	Fatty Acid Metabolism R-HSA-8978868	1/173	0.0752243	0.104258	0	0	14.4033	37.2655	ACOT7
177	RNA transport	1/186	0.0806682	0.0941129	0	0	13.3824	33.6891	SUMO1
236	Mitotic Prometaphase R-HSA-68877	1/186	0.0806682	0.108013	0	0	13.3824	33.6891	SPDL1
237	Metabolism Of Vitamins And Cofactors R-HSA-196854	1/186	0.0806682	0.108013	0	0	13.3824	33.6891	MTHFD1
162	Protein Heterodimerization Activity (GO:0046982)	1/190	0.0823376	0.12134	0	0	13.0966	32.7012	TOP2A
110	Regulation Of Signal Transduction (GO:0009966)	1/193	0.0835878	0.0926243	0	0	12.89	31.9911	SUMO1
111	Regulation Of Cell Differentiation (GO:0045595)	1/193	0.0835878	0.0926243	0	0	12.89	31.9911	TRPS1
238	Interferon Signaling R-HSA-913531	1/200	0.0864991	0.11389	0	0	12.4322	30.4292	SUMO1
112	Protein Stabilization (GO:0050821)	1/208	0.0898162	0.0986374	0	0	11.9469	28.7918	SUMO1
133	Intracellular Non-Membrane-Bounded Organelle (GO:0043232)	2/1195	0.0971015	0.168221	0	0	4.50198	10.4986	TOP2A;SUMO1
134	Nuclear Membrane (GO:0031965)	1/227	0.0976515	0.168221	0	0	10.932	25.4316	SUMO1
135	Vesicle (GO:0031982)	1/235	0.100933	0.168221	0	0	10.554	24.2034	AHNAK
163	DNA-binding Transcription Repressor Activity, RNA Polymerase II-specific (GO:0001227)	1/243	0.104203	0.145884	0	0	10.2009	23.0685	TRPS1
113	Positive Regulation Of Programmed Cell Death (GO:0043068)	1/245	0.105019	0.114313	0	0	10.1163	22.7982	TOP2A
239	Diseases Of Metabolism R-HSA-5668914	1/247	0.105834	0.137064	0	0	10.033	22.533	GNE
178	Salmonella infection	1/249	0.106649	0.106649	0	0	9.95111	22.2727	AHNAK
240	RHO GTPase Effectors R-HSA-195258	1/269	0.114759	0.144917	0	0	9.19916	19.9154	SPDL1
114	Positive Regulation Of Apoptotic Process (GO:0043065)	1/270	0.115163	0.124255	0	0	9.1645	19.8082	TOP2A
164	Ubiquitin Protein Ligase Binding (GO:0031625)	1/271	0.115567	0.154089	0	0	9.13009	19.7019	SUMO1
241	Cell Cycle Checkpoints R-HSA-69620	1/271	0.115567	0.144917	0	0	9.13009	19.7019	SPDL1
242	Asparagine N-linked Glycosylation R-HSA-446203	1/282	0.119996	0.146329	0	0	8.76779	18.5903	GNE
243	SARS-CoV-2 Infection R-HSA-9694516	1/283	0.120397	0.146329	0	0	8.73626	18.4943	SUMO1
136	Lytic Vacuole Membrane (GO:0098852)	1/287	0.122002	0.181146	0	0	8.61233	18.1179	AHNAK
165	Ubiquitin-Like Protein Ligase Binding (GO:0044389)	1/289	0.122804	0.156296	0	0	8.55165	17.9342	SUMO1
115	DNA Repair (GO:0006281)	1/291	0.123605	0.132203	0	0	8.49181	17.7535	SUMO1
137	Cell-Cell Junction (GO:0005911)	1/299	0.126802	0.181146	0	0	8.26049	17.059	AHNAK
244	DNA Repair R-HSA-73894	1/310	0.131181	0.15702	0	0	7.96197	16.1722	SUMO1
166	Cadherin Binding (GO:0045296)	1/319	0.134749	0.164043	0	0	7.7331	15.4998	AHNAK
138	Actin Cytoskeleton (GO:0015629)	1/327	0.13791	0.182629	0	0	7.54026	14.9384	AHNAK
116	Protein Localization (GO:0008104)	1/351	0.147331	0.156222	0	0	7.01464	13.4335	SUMO1
139	Lysosomal Membrane (GO:0005765)	1/356	0.149282	0.182629	0	0	6.91408	13.15	AHNAK
117	Protein Modification By Small Protein Conjugation (GO:0032446)	1/364	0.152396	0.160211	0	0	6.75895	12.7154	SUMO1
245	SARS-CoV Infections R-HSA-9679506	1/369	0.154337	0.181979	0	0	6.66542	12.4551	SUMO1
140	Focal Adhesion (GO:0005925)	1/387	0.161291	0.182629	0	0	6.34877	11.5836	AHNAK
141	Cell-Substrate Junction (GO:0030055)	1/395	0.164366	0.182629	0	0	6.21732	11.2264	AHNAK
246	Disease R-HSA-1643685	2/1736	0.180485	0.209681	0	0	3.00824	5.15043	SUMO1;GNE
118	Negative Regulation Of Nucleic Acid-Templated Transcription (GO:1903507)	1/456	0.187482	0.195426	0	0	5.36703	8.98481	SUMO1
167	Transcription Cis-Regulatory Region Binding (GO:0000976)	1/474	0.194193	0.226559	0	0	5.15803	8.45351	TRPS1
142	Lysosome (GO:0005764)	1/503	0.204903	0.215687	0	0	4.85284	7.69281	AHNAK
168	Protein Kinase Binding (GO:0019901)	1/511	0.207835	0.227754	0	0	4.77475	7.5012	TOP2A
169	Metal Ion Binding (GO:0046872)	1/521	0.211486	0.227754	0	0	4.68053	7.27165	TOP2A
119	Regulation Of DNA-templated Transcription (GO:0006355)	2/1922	0.21177	0.218888	0	0	2.68914	4.17423	SUMO1;TRPS1
247	Metabolism R-HSA-1430728	2/2049	0.233602	0.267457	0	0	2.50457	3.64199	ACOT7;MTHFD1
143	Cytoskeleton (GO:0005856)	1/599	0.239458	0.239458	0	0	4.05372	5.7943	AHNAK
248	Signaling By Rho GTPases R-HSA-194315	1/644	0.255191	0.288001	0	0	3.76128	5.13693	SPDL1
249	Signaling By Rho GTPases, Miro GTPases And RHOBTB3 R-HSA-9716542	1/660	0.260715	0.290091	0	0	3.66692	4.92954	SPDL1
250	Cytokine Signaling In Immune System R-HSA-1280215	1/702	0.275042	0.301783	0	0	3.43973	4.44011	SUMO1
120	Regulation Of Apoptotic Process (GO:0042981)	1/705	0.276056	0.282958	0	0	3.42454	4.4079	TOP2A
251	Metabolism Of Lipids R-HSA-556833	1/732	0.285125	0.308559	0	0	3.29343	4.1327	ACOT7
121	Negative Regulation Of Transcription By RNA Polymerase II (GO:0000122)	1/763	0.295412	0.300295	0	0	3.15436	3.84638	TRPS1
170	DNA Binding (GO:0003677)	1/846	0.32231	0.334247	0	0	2.83225	3.20679	TOP2A
252	Infectious Disease R-HSA-5663205	1/961	0.358069	0.382263	0	0	2.47799	2.54497	SUMO1
122	Regulation Of Gene Expression (GO:0010468)	1/1127	0.40673	0.410064	0	0	2.09425	1.884	AHNAK
253	Generic Transcription Pathway R-HSA-212436	1/1190	0.424321	0.446952	0	0	1.97666	1.69452	SUMO1
171	RNA Polymerase II Transcription Regulatory Region Sequence-Specific DNA Binding (GO:0000977)	1/1225	0.433892	0.433892	0	0	1.91656	1.60025	TRPS1
254	RNA Polymerase II Transcription R-HSA-73857	1/1312	0.457073	0.475116	0	0	1.78108	1.39443	SUMO1
255	Gene Expression (Transcription) R-HSA-74160	1/1449	0.491869	0.504645	0	0	1.60074	1.13579	SUMO1
256	Immune System R-HSA-168256	1/1943	0.601474	0.609185	0	0	1.16175	0.590604	SUMO1
123	Regulation Of Transcription By RNA Polymerase II (GO:0006357)	1/2028	0.618047	0.618047	0	0	1.10779	0.533061	TRPS1
257	Signal Transduction R-HSA-162582	1/2465	0.693964	0.693964	0	0	0.889154	0.32484	SPDL1

## Sheet: Cluster2
	Term	Overlap	P.value	Adjusted.P.value	Old.P.value	Old.Adjusted.P.value	Odds.Ratio	Combined.Score	Genes
181	Cytosolic Large Ribosomal Subunit (GO:0022625)	7/52	8.72746e-14	1.61458e-12	0	0	206.713	6215.79	RPL4;RPL5;RPL18A;RPL13A;RPL13;RPL9;RPL17
182	Large Ribosomal Subunit (GO:0015934)	7/52	8.72746e-14	1.61458e-12	0	0	206.713	6215.79	RPL4;RPL5;RPL18A;RPL13A;RPL13;RPL9;RPL17
258	Ribosome	8/158	3.69344e-12	6.27886e-11	0	0	75.5352	1988.42	RPL4;RPL5;RPL18A;RPL23;RPL13A;RPL13;RPL9;RPL17
1	Cytoplasmic Translation (GO:0002181)	7/93	6.01628e-12	1.08293e-09	0	0	107.941	2788.83	RPL4;RPL5;RPL18A;RPL13A;RPL13;RPL9;RPL17
2	Macromolecule Biosynthetic Process (GO:0009059)	8/183	1.20734e-11	1.08661e-09	0	0	64.6629	1625.63	EIF5A;RPL4;RPL5;RPL18A;RPL13A;RPL13;RPL9;RPL17
259	Coronavirus disease	8/232	8.07573e-11	6.86437e-10	0	0	50.3929	1171.11	RPL4;RPL5;RPL18A;RPL23;RPL13A;RPL13;RPL9;RPL17
3	Translation (GO:0006412)	8/234	8.64804e-11	5.18883e-09	0	0	49.9418	1157.21	EIF5A;RPL4;RPL5;RPL18A;RPL13A;RPL13;RPL9;RPL17
4	Peptide Biosynthetic Process (GO:0043043)	7/158	2.59343e-10	1.16704e-08	0	0	61.2755	1352.53	RPL4;RPL5;RPL18A;RPL13A;RPL13;RPL9;RPL17
275	Peptide Chain Elongation R-HSA-156902	6/86	3.73739e-10	1.12902e-08	0	0	93.2719	2024.7	RPL4;RPL5;RPL18A;RPL23;RPL13A;RPL9
276	Selenocysteine Synthesis R-HSA-2408557	6/90	4.93576e-10	1.12902e-08	0	0	88.8125	1903.19	RPL4;RPL5;RPL18A;RPL23;RPL13A;RPL9
277	Viral mRNA Translation R-HSA-192823	6/90	4.93576e-10	1.12902e-08	0	0	88.8125	1903.19	RPL4;RPL5;RPL18A;RPL23;RPL13A;RPL9
278	Eukaryotic Translation Elongation R-HSA-156842	6/90	4.93576e-10	1.12902e-08	0	0	88.8125	1903.19	RPL4;RPL5;RPL18A;RPL23;RPL13A;RPL9
279	Eukaryotic Translation Termination R-HSA-72764	6/90	4.93576e-10	1.12902e-08	0	0	88.8125	1903.19	RPL4;RPL5;RPL18A;RPL23;RPL13A;RPL9
280	Nonsense Mediated Decay (NMD) Independent Of Exon Junction Complex (EJC) R-HSA-975956	6/92	5.64508e-10	1.12902e-08	0	0	86.7384	1847.1	RPL4;RPL5;RPL18A;RPL23;RPL13A;RPL9
281	Formation Of A Pool Of Free 40S Subunits R-HSA-72689	6/98	8.2989e-10	1.24483e-08	0	0	81.0571	1694.88	RPL4;RPL5;RPL18A;RPL23;RPL13A;RPL9
282	Response Of EIF2AK4 (GCN2) To Amino Acid Deficiency R-HSA-9633012	6/98	8.2989e-10	1.24483e-08	0	0	81.0571	1694.88	RPL4;RPL5;RPL18A;RPL23;RPL13A;RPL9
283	L13a-mediated Translational Silencing Of Ceruloplasmin Expression R-HSA-156827	6/108	1.49833e-09	1.72857e-08	0	0	73.0735	1484.77	RPL4;RPL5;RPL18A;RPL23;RPL13A;RPL9
284	SRP-dependent Cotranslational Protein Targeting To Membrane R-HSA-1799339	6/108	1.49833e-09	1.72857e-08	0	0	73.0735	1484.77	RPL4;RPL5;RPL18A;RPL23;RPL13A;RPL9
285	GTP Hydrolysis And Joining Of 60S Ribosomal Subunit R-HSA-72706	6/109	1.58452e-09	1.72857e-08	0	0	72.3604	1466.24	RPL4;RPL5;RPL18A;RPL23;RPL13A;RPL9
286	Nonsense Mediated Decay (NMD) Enhanced By Exon Junction Complex (EJC) R-HSA-975957	6/112	1.86813e-09	1.86813e-08	0	0	70.3019	1412.95	RPL4;RPL5;RPL18A;RPL23;RPL13A;RPL9
287	Selenoamino Acid Metabolism R-HSA-2408522	6/114	2.07963e-09	1.91966e-08	0	0	68.9931	1379.25	RPL4;RPL5;RPL18A;RPL23;RPL13A;RPL9
288	Cap-dependent Translation Initiation R-HSA-72737	6/116	2.31061e-09	1.98052e-08	0	0	67.7318	1346.9	RPL4;RPL5;RPL18A;RPL23;RPL13A;RPL9
289	Influenza Viral RNA Transcription And Replication R-HSA-168273	6/137	6.30809e-09	5.04647e-08	0	0	56.8139	1072.73	RPL4;RPL5;RPL18A;RPL23;RPL13A;RPL9
290	Cellular Response To Starvation R-HSA-9711097	6/153	1.22474e-08	9.18553e-08	0	0	50.5893	921.633	RPL4;RPL5;RPL18A;RPL23;RPL13A;RPL9
291	Influenza Infection R-HSA-168255	6/157	1.42958e-08	1.00911e-07	0	0	49.2392	889.423	RPL4;RPL5;RPL18A;RPL23;RPL13A;RPL9
5	Gene Expression (GO:0010467)	7/296	2.04264e-08	7.35351e-07	0	0	31.7931	562.942	RPL4;RPL5;RPL18A;RPL13A;RPL13;RPL9;RPL17
292	Regulation Of Expression Of SLITs And ROBOs R-HSA-9010553	6/167	2.06852e-08	1.37901e-07	0	0	46.1576	816.706	RPL4;RPL5;RPL18A;RPL23;RPL13A;RPL9
293	Major Pathway Of rRNA Processing In Nucleolus And Cytosol R-HSA-6791226	6/179	3.13012e-08	1.97692e-07	0	0	42.9299	741.812	RPL4;RPL5;RPL18A;RPL23;RPL13A;RPL9
294	rRNA Processing In Nucleus And Cytosol R-HSA-8868773	6/189	4.32698e-08	2.59619e-07	0	0	40.5635	687.787	RPL4;RPL5;RPL18A;RPL23;RPL13A;RPL9
295	rRNA Processing R-HSA-72312	6/199	5.87901e-08	3.35943e-07	0	0	38.4424	640.038	RPL4;RPL5;RPL18A;RPL23;RPL13A;RPL9
296	Signaling By ROBO Receptors R-HSA-376176	6/209	7.86435e-08	4.28965e-07	0	0	36.5302	597.573	RPL4;RPL5;RPL18A;RPL23;RPL13A;RPL9
297	Translation R-HSA-72766	6/281	4.50339e-07	2.34959e-06	0	0	26.8677	392.625	RPL4;RPL5;RPL18A;RPL23;RPL13A;RPL9
183	Ribosome (GO:0005840)	4/61	5.49671e-07	6.77928e-06	0	0	77.6647	1119.45	RPL18A;RPL13A;RPL9;RPL17
218	RNA Binding (GO:0003723)	10/1411	8.72263e-07	3.48905e-05	0	0	11.0498	154.169	EIF5A;RPL4;RPL5;RPL18A;YTHDC2;BCCIP;RPL13A;RPL13;RPL9;RPL17
298	Metabolism Of Amino Acids And Derivatives R-HSA-71291	6/364	2.03378e-06	1.01689e-05	0	0	20.5517	269.342	RPL4;RPL5;RPL18A;RPL23;RPL13A;RPL9
184	Focal Adhesion (GO:0005925)	6/387	2.89808e-06	2.4132e-05	0	0	19.2884	245.955	RPL4;RPL5;PEAK1;RPL13A;RPL9;RPL17
185	Cell-Substrate Junction (GO:0030055)	6/395	3.26108e-06	2.4132e-05	0	0	18.884	238.57	RPL4;RPL5;PEAK1;RPL13A;RPL9;RPL17
299	Axon Guidance R-HSA-422475	6/519	1.55356e-05	7.45707e-05	0	0	14.2288	157.547	RPL4;RPL5;RPL18A;RPL23;RPL13A;RPL9
300	Nervous System Development R-HSA-9675108	6/545	2.04852e-05	9.4547e-05	0	0	13.5244	146.006	RPL4;RPL5;RPL18A;RPL23;RPL13A;RPL9
219	Ubiquitin Ligase Inhibitor Activity (GO:1990948)	2/7	2.41742e-05	0.000429478	0	0	399.46	4246.35	RPL5;RPL17
6	Negative Regulation Of Ubiquitin Protein Ligase Activity (GO:1904667)	2/8	3.22108e-05	0.000966325	0	0	332.867	3442.91	RPL5;RPL17
220	Ubiquitin-Protein Transferase Inhibitor Activity (GO:0055105)	2/8	3.22108e-05	0.000429478	0	0	332.867	3442.91	RPL5;RPL17
301	Metabolism Of RNA R-HSA-8953854	6/666	6.30104e-05	0.000280046	0	0	10.9761	106.164	RPL4;RPL5;RPL18A;RPL23;RPL13A;RPL9
302	Cellular Responses To Stress R-HSA-2262752	6/722	9.85223e-05	0.000422239	0	0	10.0883	93.0672	RPL4;RPL5;RPL18A;RPL23;RPL13A;RPL9
303	Cellular Responses To Stimuli R-HSA-8953897	6/736	0.00010952	0.000453185	0	0	9.88767	90.1697	RPL4;RPL5;RPL18A;RPL23;RPL13A;RPL9
7	Negative Regulation Of Ubiquitin-Protein Transferase Activity (GO:0051444)	2/17	0.000155519	0.00349917	0	0	133.087	1167	RPL5;RPL17
8	Regulation Of Ubiquitin Protein Ligase Activity (GO:1904666)	2/17	0.000155519	0.00349917	0	0	133.087	1167	RPL5;RPL17
9	Positive Regulation Of Signal Transduction By P53 Class Mediator (GO:1901798)	2/21	0.000239501	0.00479002	0	0	105.047	875.775	EIF5A;RPL17
304	Disease R-HSA-1643685	8/1736	0.000334177	0.00133671	0	0	6.03505	48.3036	RPL4;RPL5;RPL18A;RPL23;RPL13A;TTF2;BRCA2;RPL9
10	Negative Regulation Of Proteolysis Involved In Protein Catabolic Process (GO:1903051)	2/25	0.000341234	0.00614222	0	0	86.7609	692.607	RPL5;RPL17
305	Infectious Disease R-HSA-5663205	6/961	0.000465564	0.00180218	0	0	7.46976	57.31	RPL4;RPL5;RPL18A;RPL23;RPL13A;RPL9
306	Metabolism Of Proteins R-HSA-392499	8/1890	0.00059611	0.00223541	0	0	5.49446	40.7968	RPL4;RPL5;RPL18A;COPB1;RPL23;RPL13A;TTF2;RPL9
11	Tumor Necrosis Factor-Mediated Signaling Pathway (GO:0033209)	2/38	0.000792737	0.0125255	0	0	55.3944	395.517	EIF5A;TNFRSF1B
307	Developmental Biology R-HSA-1266738	6/1073	0.000834852	0.00303583	0	0	6.64632	47.1108	RPL4;RPL5;RPL18A;RPL23;RPL13A;RPL9
12	Negative Regulation Of Ubiquitin-Dependent Protein Catabolic Process (GO:2000059)	2/39	0.000835032	0.0125255	0	0	53.8946	382.007	RPL5;RPL17
13	Regulation Of Ubiquitin-Dependent Protein Catabolic Process (GO:2000058)	2/42	0.000968324	0.0134076	0	0	49.845	345.921	RPL5;RPL17
221	rRNA Binding (GO:0019843)	2/46	0.00116092	0.0116092	0	0	45.3045	306.193	RPL5;RPL17
14	Regulation Of Signal Transduction By P53 Class Mediator (GO:1901796)	2/47	0.00121171	0.0155791	0	0	44.2956	297.477	RPL5;RPL17
186	Nucleolus (GO:0005730)	5/771	0.00128077	0.00676756	0	0	7.37675	49.1313	RPL4;RPL5;RPL13A;RPL13;RPL17
187	Nuclear Lumen (GO:0031981)	5/780	0.00134873	0.00676756	0	0	7.28767	48.1612	RPL4;RPL5;RPL13A;RPL13;RPL17
188	Intracellular Non-Membrane-Bounded Organelle (GO:0043232)	6/1195	0.00146326	0.00676756	0	0	5.92588	38.6788	RPL4;RPL5;RPL13A;RPL13;RPL9;RPL17
15	Negative Regulation Of Catabolic Process (GO:0009895)	2/72	0.00281782	0.0338139	0	0	28.44	166.994	RPL5;RPL17
222	Ubiquitin Protein Ligase Binding (GO:0031625)	3/271	0.00313112	0.0250114	0	0	11.6123	66.9609	RPL5;TNFRSF1B;RPL17
16	Spindle Assembly (GO:0051225)	2/81	0.00355059	0.0399441	0	0	25.1886	142.08	HAUS8;BCCIP
223	Ubiquitin-Like Protein Ligase Binding (GO:0044389)	3/289	0.00375171	0.0250114	0	0	10.8715	60.7235	RPL5;TNFRSF1B;RPL17
189	Nucleus (GO:0005634)	11/4487	0.00415901	0.0170981	0	0	3.46336	18.9878	EIF5A;RPL4;RPL5;HAUS8;BCCIP;RPL13A;RPL13;AARSD1;BRCA2;RPL9;RPL17
308	Metabolism R-HSA-1430728	7/2049	0.00499866	0.0176423	0	0	4.09899	21.7188	RPL4;RPL5;RPL18A;RPL23;RPL13A;RPL9;MTMR6
17	Establishment Of Protein Localization To Telomere (GO:0070200)	1/5	0.00548839	0.0581124	0	0	237.786	1237.7	BRCA2
224	Large Ribosomal Subunit rRNA Binding (GO:0070180)	1/5	0.00548839	0.0274419	0	0	237.786	1237.7	RPL17
225	3'-5' RNA Helicase Activity (GO:0034458)	1/5	0.00548839	0.0274419	0	0	237.786	1237.7	YTHDC2
18	Positive Regulation Of Translation (GO:0045727)	2/108	0.00621938	0.0621938	0	0	18.7472	95.2372	EIF5A;RPL5
19	Cellular Response To Tumor Necrosis Factor (GO:0071356)	2/119	0.00750239	0.0628012	0	0	16.9752	83.0518	EIF5A;TNFRSF1B
20	Regulation Of Extracellular Matrix Constituent Secretion (GO:0003330)	1/7	0.0076757	0.0628012	0	0	158.508	771.886	TNFRSF1B
21	Positive Regulation By Host Of Viral Genome Replication (GO:0044829)	1/7	0.0076757	0.0628012	0	0	158.508	771.886	YTHDC2
22	Positive Regulation Of Oligodendrocyte Differentiation (GO:0048714)	1/7	0.0076757	0.0628012	0	0	158.508	771.886	TNFRSF1B
309	Defective Factor VIII Causes Hemophilia A R-HSA-9662001	1/7	0.0076757	0.0263167	0	0	158.508	771.886	TTF2
23	Regulation Of Intrinsic Apoptotic Signaling Pathway By P53 Class Mediator (GO:1902253)	1/8	0.00876763	0.0657572	0	0	135.857	643.513	EIF5A
24	Regulation Of RNA Biosynthetic Process (GO:2001141)	1/8	0.00876763	0.0657572	0	0	135.857	643.513	TNFRSF1B
226	Tumor Necrosis Factor Receptor Activity (GO:0005031)	1/8	0.00876763	0.0334356	0	0	135.857	643.513	TNFRSF1B
227	5S rRNA Binding (GO:0008097)	1/8	0.00876763	0.0334356	0	0	135.857	643.513	RPL5
25	Negative Regulation Of Extracellular Matrix Organization (GO:1903054)	1/9	0.00985841	0.0709806	0	0	118.869	549.107	TNFRSF1B
228	Phosphatidylinositol-3,5-Bisphosphate 3-Phosphatase Activity (GO:0052629)	1/9	0.00985841	0.0334356	0	0	118.869	549.107	MTMR6
310	Transport Of Gamma-Carboxylated Protein Precursors From Endoplasmic Reticulum To Golgi Apparatus R-HSA-159763	1/9	0.00985841	0.0328614	0	0	118.869	549.107	TTF2
229	N6-methyladenosine-containing RNA Binding (GO:1990247)	1/10	0.0109481	0.0334356	0	0	105.656	476.994	YTHDC2
311	Removal Of Aminoterminal Propeptides From Gamma-Carboxylated Proteins R-HSA-159782	1/10	0.0109481	0.0345728	0	0	105.656	476.994	TTF2
312	Gamma-carboxylation Of Protein Precursors R-HSA-159740	1/10	0.0109481	0.0345728	0	0	105.656	476.994	TTF2
26	Histone H2A Ubiquitination (GO:0033522)	1/11	0.0120365	0.0747096	0	0	95.0857	420.261	BRCA2
27	Regulation Of T Cell Mediated Immunity (GO:0002709)	1/11	0.0120365	0.0747096	0	0	95.0857	420.261	TNFRSF1B
28	Positive Regulation Of Myelination (GO:0031643)	1/11	0.0120365	0.0747096	0	0	95.0857	420.261	TNFRSF1B
29	Regulation Of Cell Cycle Checkpoint (GO:1901976)	1/11	0.0120365	0.0747096	0	0	95.0857	420.261	BRCA2
230	Death Receptor Activity (GO:0005035)	1/11	0.0120365	0.0334356	0	0	95.0857	420.261	TNFRSF1B
231	Phosphatidylinositol-3-Phosphate Phosphatase Activity (GO:0004438)	1/11	0.0120365	0.0334356	0	0	95.0857	420.261	MTMR6
313	Gamma-carboxylation, Transport, And Amino-Terminal Cleavage Of Proteins R-HSA-159854	1/11	0.0120365	0.0370355	0	0	95.0857	420.261	TTF2
190	Intracellular Membrane-Bounded Organelle (GO:0043231)	11/5175	0.0129844	0.0438145	0	0	2.86871	12.4617	EIF5A;RPL4;RPL5;COPB1;BCCIP;RPL13A;RPL13;AARSD1;BRCA2;RPL9;RPL17
30	Histone Monoubiquitination (GO:0010390)	1/12	0.0131239	0.076196	0	0	86.4372	374.56	BRCA2
191	COPI Vesicle Coat (GO:0030126)	1/12	0.0131239	0.0438145	0	0	86.4372	374.56	COPB1
232	Phosphatidylinositol Monophosphate Phosphatase Activity (GO:0052744)	1/12	0.0131239	0.0334356	0	0	86.4372	374.56	MTMR6
314	HDR Thru MMEJ (alt-NHEJ) R-HSA-5685939	1/12	0.0131239	0.0393717	0	0	86.4372	374.56	BRCA2
31	Negative Regulation Of Neuroinflammatory Response (GO:0150079)	1/13	0.0142101	0.076196	0	0	79.2302	337.029	TNFRSF1B
192	Mitotic Spindle Microtubule (GO:1990498)	1/13	0.0142101	0.0438145	0	0	79.2302	337.029	HAUS8
233	Phosphatidylinositol-3,5-Bisphosphate Phosphatase Activity (GO:0106018)	1/13	0.0142101	0.0334356	0	0	79.2302	337.029	MTMR6
234	U6 snRNA Binding (GO:0017070)	1/13	0.0142101	0.0334356	0	0	79.2302	337.029	EIF5A
32	Histone H2A Monoubiquitination (GO:0035518)	1/14	0.0152952	0.076196	0	0	73.1319	305.707	BRCA2
33	Establishment Of Protein Localization To Chromosome (GO:0070199)	1/14	0.0152952	0.076196	0	0	73.1319	305.707	BRCA2
34	Positive Regulation Of Membrane Protein Ectodomain Proteolysis (GO:0051044)	1/14	0.0152952	0.076196	0	0	73.1319	305.707	TNFRSF1B
235	Translation Elongation Factor Activity (GO:0003746)	1/14	0.0152952	0.0339893	0	0	73.1319	305.707	EIF5A
35	Protein Localization To Chromosome, Telomeric Region (GO:0070198)	1/15	0.0163791	0.076196	0	0	67.9048	279.207	BRCA2
36	Golgi To Endosome Transport (GO:0006895)	1/15	0.0163791	0.076196	0	0	67.9048	279.207	MON2
315	Defects Of Contact Activation System (CAS) And Kallikrein/Kinin System (KKS) R-HSA-9651496	1/15	0.0163791	0.0479388	0	0	67.9048	279.207	TTF2
37	Phosphatidylinositol Dephosphorylation (GO:0046856)	1/16	0.0174619	0.076196	0	0	63.3746	256.524	MTMR6
193	COPI-coated Vesicle Membrane (GO:0030663)	1/16	0.0174619	0.0496992	0	0	63.3746	256.524	COPB1
38	Positive Regulation Of Glial Cell Differentiation (GO:0045687)	1/17	0.0185435	0.076196	0	0	59.4107	236.908	TNFRSF1B
39	Positive Regulation By Host Of Viral Process (GO:0044794)	1/17	0.0185435	0.076196	0	0	59.4107	236.908	YTHDC2
236	RNA Polymerase Binding (GO:0070063)	1/17	0.0185435	0.0390391	0	0	59.4107	236.908	YTHDC2
40	Regulation Of DNA Damage Checkpoint (GO:2000001)	1/18	0.0196241	0.076196	0	0	55.9132	219.795	BRCA2
41	Regulation Of Lymphocyte Proliferation (GO:0050670)	1/18	0.0196241	0.076196	0	0	55.9132	219.795	TNFRSF1B
42	Regulation Of Protein Neddylation (GO:2000434)	1/18	0.0196241	0.076196	0	0	55.9132	219.795	RPL5
43	Regulation Of T Cell Cytokine Production (GO:0002724)	1/18	0.0196241	0.076196	0	0	55.9132	219.795	TNFRSF1B
44	Regulation Of Oligodendrocyte Differentiation (GO:0048713)	1/18	0.0196241	0.076196	0	0	55.9132	219.795	TNFRSF1B
45	Positive Regulation Of Nervous System Process (GO:0031646)	1/18	0.0196241	0.076196	0	0	55.9132	219.795	TNFRSF1B
46	Regulation Of Translation (GO:0006417)	2/202	0.0205334	0.076196	0	0	9.889	38.4257	RPL5;RPL13A
47	Regulation Of Neuroinflammatory Response (GO:0150077)	1/19	0.0207034	0.076196	0	0	52.8042	204.746	TNFRSF1B
48	Protein Stabilization (GO:0050821)	2/208	0.0216883	0.076196	0	0	9.59806	36.77	RPL5;RPL17
49	protein-DNA Complex Disassembly (GO:0032986)	1/20	0.0217817	0.076196	0	0	50.0226	191.421	RPL17
50	Pulmonary Valve Development (GO:0003177)	1/20	0.0217817	0.076196	0	0	50.0226	191.421	TNFRSF1B
237	Histone H4 Acetyltransferase Activity (GO:0010485)	1/20	0.0217817	0.0435634	0	0	50.0226	191.421	BRCA2
51	Regulation Of Membrane Protein Ectodomain Proteolysis (GO:0051043)	1/21	0.0228588	0.076196	0	0	47.519	179.547	TNFRSF1B
52	Focal Adhesion Assembly (GO:0048041)	1/21	0.0228588	0.076196	0	0	47.519	179.547	PEAK1
53	Modulation By Host Of Viral Genome Replication (GO:0044827)	1/21	0.0228588	0.076196	0	0	47.519	179.547	YTHDC2
54	Regulation Of Cell-Substrate Junction Assembly (GO:0090109)	1/21	0.0228588	0.076196	0	0	47.519	179.547	PEAK1
316	Intrinsic Pathway Of Fibrin Clot Formation R-HSA-140837	1/21	0.0228588	0.0653109	0	0	47.519	179.547	TTF2
55	Ribosomal Large Subunit Assembly (GO:0000027)	1/22	0.0239348	0.078332	0	0	45.254	168.907	RPL5
317	Common Pathway Of Fibrin Clot Formation R-HSA-140875	1/22	0.0239348	0.0667948	0	0	45.254	168.907	TTF2
56	Regulation Of Cytokine Production Involved In Immune Response (GO:0002718)	1/24	0.0260834	0.0838394	0	0	41.3147	150.652	TNFRSF1B
238	mRNA 5'-UTR Binding (GO:0048027)	1/24	0.0260834	0.0496826	0	0	41.3147	150.652	RPL5
318	Impaired BRCA2 Binding To PALB2 R-HSA-9709603	1/24	0.0260834	0.0711364	0	0	41.3147	150.652	BRCA2
57	Regulation Of Myelination (GO:0031641)	1/25	0.0271559	0.0857556	0	0	39.5913	142.772	TNFRSF1B
319	Defective HDR Thru Homologous Recombination (HRR) Due To BRCA1 Loss-Of-Function R-HSA-9701192	1/25	0.0271559	0.0724159	0	0	39.5913	142.772	BRCA2
239	Histone Acetyltransferase Activity (GO:0004402)	1/27	0.0292977	0.0532686	0	0	36.5421	129.003	BRCA2
320	Resolution Of D-loop Structures Thru Synthesis-Dependent Strand Annealing (SDSA) R-HSA-5693554	1/27	0.0292977	0.0764289	0	0	36.5421	129.003	BRCA2
58	Cell-Substrate Junction Assembly (GO:0007044)	1/28	0.030367	0.0942423	0	0	35.1869	122.957	PEAK1
194	Polysomal Ribosome (GO:0042788)	1/28	0.030367	0.0801716	0	0	35.1869	122.957	RPL18A
240	Gamma-Tubulin Binding (GO:0043015)	1/29	0.0314351	0.0546697	0	0	33.9286	117.387	BRCA2
321	TNFs Bind Their Physiological Receptors R-HSA-5669034	1/29	0.0314351	0.0802597	0	0	33.9286	117.387	TNFRSF1B
59	Cytokine-Mediated Signaling Pathway (GO:0019221)	2/257	0.0320871	0.097506	0	0	7.73451	26.6013	EIF5A;TNFRSF1B
60	Phospholipid Dephosphorylation (GO:0046839)	1/30	0.032502	0.097506	0	0	32.757	112.24	MTMR6
195	Rough Endoplasmic Reticulum (GO:0005791)	1/30	0.032502	0.0801716	0	0	32.757	112.24	RPL4
322	Thrombin Signaling Thru Proteinase Activated Receptors (PARs) R-HSA-456926	1/32	0.0346326	0.0865815	0	0	30.6406	103.043	TTF2
61	intra-Golgi Vesicle-Mediated Transport (GO:0006891)	1/33	0.0356962	0.105333	0	0	29.6815	98.92	COPB1
323	Resolution Of D-loop Structures Thru Holliday Junction Intermediates R-HSA-5693568	1/33	0.0356962	0.0874192	0	0	29.6815	98.92	BRCA2
241	Transcription Coactivator Binding (GO:0001223)	1/34	0.0367587	0.0598158	0	0	28.7807	95.0735	RPL17
324	Resolution Of D-Loop Structures R-HSA-5693537	1/34	0.0367587	0.0882208	0	0	28.7807	95.0735	BRCA2
196	Secretory Granule Membrane (GO:0030667)	2/279	0.0372836	0.0862182	0	0	7.11227	23.3937	COPB1;TNFRSF1B
325	Impaired BRCA2 Binding To RAD51 R-HSA-9709570	1/35	0.03782	0.0887543	0	0	27.9328	91.4775	BRCA2
242	mRNA Binding (GO:0003729)	2/282	0.038016	0.0598158	0	0	7.035	23.0027	RPL5;RPL13A
62	Substrate Adhesion-Dependent Cell Spreading (GO:0034446)	1/36	0.0388803	0.112878	0	0	27.1333	88.1092	PEAK1
243	Non-Membrane Spanning Protein Tyrosine Kinase Activity (GO:0004715)	1/36	0.0388803	0.0598158	0	0	27.1333	88.1092	PEAK1
326	Platelet Aggregation (Plug Formation) R-HSA-76009	1/36	0.0388803	0.0887543	0	0	27.1333	88.1092	TTF2
197	Vesicle Coat (GO:0030120)	1/37	0.0399394	0.086927	0	0	26.3783	84.9485	COPB1
327	Formation Of Fibrin Clot (Clotting Cascade) R-HSA-140877	1/37	0.0399394	0.0887543	0	0	26.3783	84.9485	TTF2
328	RHOV GTPase Cycle R-HSA-9013424	1/37	0.0399394	0.0887543	0	0	26.3783	84.9485	PEAK1
63	Positive Regulation Of Intrinsic Apoptotic Signaling Pathway (GO:2001244)	1/39	0.0420543	0.119382	0	0	24.9875	79.1801	EIF5A
329	RHOU GTPase Cycle R-HSA-9013420	1/39	0.0420543	0.0917549	0	0	24.9875	79.1801	PEAK1
64	Negative Regulation Of Secretion By Cell (GO:1903531)	1/40	0.0431101	0.119382	0	0	24.3455	76.5423	TNFRSF1B
65	Aortic Valve Development (GO:0003176)	1/40	0.0431101	0.119382	0	0	24.3455	76.5423	TNFRSF1B
330	Presynaptic Phase Of Homologous DNA Pairing And Strand Exchange R-HSA-5693616	1/40	0.0431101	0.0923789	0	0	24.3455	76.5423	BRCA2
260	Homologous recombination	1/41	0.0441648	0.170824	0	0	23.7357	74.0513	BRCA2
331	Defective Homologous Recombination Repair (HRR) Due To BRCA2 Loss Of Function R-HSA-9701190	1/41	0.0441648	0.0929786	0	0	23.7357	74.0513	BRCA2
66	Translational Elongation (GO:0006414)	1/42	0.0452184	0.123323	0	0	23.1556	71.6957	EIF5A
332	Gamma Carboxylation, Hypusine Formation And Arylsulfatase Activation R-HSA-163841	1/42	0.0452184	0.0935553	0	0	23.1556	71.6957	TTF2
244	snRNA Binding (GO:0017069)	1/43	0.0462709	0.0685494	0	0	22.6032	69.465	EIF5A
333	Homologous DNA Pairing And Strand Exchange R-HSA-5693579	1/43	0.0462709	0.0941103	0	0	22.6032	69.465	BRCA2
67	Mitotic Spindle Assembly (GO:0090307)	1/44	0.0473222	0.125265	0	0	22.0764	67.3502	BCCIP
68	Bone Development (GO:0060348)	1/44	0.0473222	0.125265	0	0	22.0764	67.3502	RPL13
245	Tubulin Binding (GO:0015631)	2/322	0.0483012	0.0690017	0	0	6.14313	18.6155	HAUS8;BRCA2
334	Regulation Of Complement Cascade R-HSA-977606	1/45	0.0483725	0.095159	0	0	21.5736	65.3426	TTF2
335	Interleukin-10 Signaling R-HSA-6783783	1/45	0.0483725	0.095159	0	0	21.5736	65.3426	TNFRSF1B
69	Replication Fork Processing (GO:0031297)	1/46	0.0494216	0.127084	0	0	21.0931	63.4348	BRCA2
70	Regulation Of Nervous System Development (GO:0051960)	1/46	0.0494216	0.127084	0	0	21.0931	63.4348	TNFRSF1B
198	Golgi-associated Vesicle (GO:0005798)	1/47	0.0504697	0.103743	0	0	20.6335	61.6196	COPB1
71	Cellular Response To Radiation (GO:0071478)	1/48	0.0515166	0.128718	0	0	20.1935	59.891	BRCA2
72	Intrinsic Apoptotic Signaling Pathway In Response To DNA Damage (GO:0008630)	1/49	0.0525625	0.128718	0	0	19.7718	58.2429	TNFRSF1B
73	Ribosome Assembly (GO:0042255)	1/50	0.0536072	0.128718	0	0	19.3673	56.6702	RPL5
336	Synthesis Of PIPs At Plasma Membrane R-HSA-1660499	1/51	0.0546508	0.104097	0	0	18.979	55.1681	MTMR6
337	Diseases Of DNA Repair R-HSA-9675135	1/51	0.0546508	0.104097	0	0	18.979	55.1681	BRCA2
74	Cellular Response To Ionizing Radiation (GO:0071479)	1/52	0.0556934	0.128718	0	0	18.606	53.7321	BRCA2
75	Spermatid Development (GO:0007286)	1/53	0.0567348	0.128718	0	0	18.2473	52.3581	YTHDC2
76	Regulation Of Cyclin-Dependent Protein Kinase Activity (GO:1904029)	1/53	0.0567348	0.128718	0	0	18.2473	52.3581	BCCIP
77	Regulation Of Macromolecule Biosynthetic Process (GO:0010556)	1/53	0.0567348	0.128718	0	0	18.2473	52.3581	TNFRSF1B
78	Negative Regulation Of Protein Modification By Small Protein Conjugation Or Removal (GO:1903321)	1/54	0.0577752	0.128718	0	0	17.9021	51.0423	RPL5
79	Regulation Of Focal Adhesion Assembly (GO:0051893)	1/54	0.0577752	0.128718	0	0	17.9021	51.0423	PEAK1
80	Ribosomal Large Subunit Biogenesis (GO:0042273)	1/54	0.0577752	0.128718	0	0	17.9021	51.0423	RPL5
261	Fanconi anemia pathway	1/54	0.0577752	0.170824	0	0	17.9021	51.0423	BRCA2
246	Protein Serine/Threonine Phosphatase Activity (GO:0004722)	1/55	0.0588144	0.0811233	0	0	17.5697	49.7813	MTMR6
338	Complement Cascade R-HSA-166658	1/55	0.0588144	0.110277	0	0	17.5697	49.7813	TTF2
81	Nucleotide-Excision Repair (GO:0006289)	1/56	0.0598526	0.128718	0	0	17.2494	48.5719	BRCA2
82	Cellular Response To Peptide (GO:1901653)	1/56	0.0598526	0.128718	0	0	17.2494	48.5719	RPL17
83	post-Golgi Vesicle-Mediated Transport (GO:0006892)	1/56	0.0598526	0.128718	0	0	17.2494	48.5719	MON2
339	Meiotic Recombination R-HSA-912446	1/56	0.0598526	0.110497	0	0	17.2494	48.5719	BRCA2
84	Positive Regulation Of Macromolecule Metabolic Process (GO:0010604)	2/364	0.0600684	0.128718	0	0	5.41878	15.2391	RPL5;RPL17
85	Regulation Of Neuron Death (GO:1901214)	1/58	0.0619256	0.128783	0	0	16.6424	46.2963	TNFRSF1B
86	Negative Regulation Of Protein-Containing Complex Assembly (GO:0031333)	1/59	0.0629605	0.128783	0	0	16.3547	45.2247	RPL13A
87	Positive Regulation Of Proteolysis (GO:0045862)	1/59	0.0629605	0.128783	0	0	16.3547	45.2247	TNFRSF1B
88	Microtubule Cytoskeleton Organization Involved In Mitosis (GO:1902850)	1/59	0.0629605	0.128783	0	0	16.3547	45.2247	BCCIP
89	protein-DNA Complex Organization (GO:0071824)	1/60	0.0639943	0.129427	0	0	16.0767	44.1942	RPL17
199	Ficolin-1-Rich Granule Membrane (GO:0101003)	1/60	0.0639943	0.12462	0	0	16.0767	44.1942	COPB1
90	Regulation Of T Cell Activation (GO:0050863)	1/62	0.0660586	0.13044	0	0	15.548	42.2473	TNFRSF1B
91	Protein-Containing Complex Disassembly (GO:0032984)	1/62	0.0660586	0.13044	0	0	15.548	42.2473	RPL17
92	Phosphatidylinositol Metabolic Process (GO:0046488)	1/63	0.0670891	0.13044	0	0	15.2965	41.327	MTMR6
93	Negative Regulation Of Cell Death (GO:0060548)	1/64	0.0681186	0.13044	0	0	15.0529	40.4397	TNFRSF1B
94	Cellular Response To Virus (GO:0098586)	1/64	0.0681186	0.13044	0	0	15.0529	40.4397	EIF5A
95	Regulation Of Cell-Matrix Adhesion (GO:0001952)	1/65	0.0691469	0.131015	0	0	14.817	39.5838	PEAK1
96	Cellular Response To Type II Interferon (GO:0071346)	1/66	0.0701742	0.131577	0	0	14.5883	38.7578	RPL13A
97	Extrinsic Apoptotic Signaling Pathway (GO:0097191)	1/67	0.0712004	0.132124	0	0	14.3665	37.96	TNFRSF1B
340	HDR Thru Homologous Recombination (HRR) R-HSA-5685942	1/67	0.0712004	0.129455	0	0	14.3665	37.96	BRCA2
200	Spindle Microtubule (GO:0005876)	1/68	0.0722255	0.133617	0	0	14.1514	37.1893	HAUS8
262	Adipocytokine signaling pathway	1/69	0.0732495	0.170824	0	0	13.9426	36.4443	TNFRSF1B
341	Loss Of Nlp From Mitotic Centrosomes R-HSA-380259	1/69	0.0732495	0.131193	0	0	13.9426	36.4443	HAUS8
98	Negative Regulation Of Epithelial Cell Proliferation (GO:0050680)	1/70	0.0742725	0.135041	0	0	13.7398	35.7237	BRCA2
99	Regulation Of Cellular Biosynthetic Process (GO:0031326)	1/70	0.0742725	0.135041	0	0	13.7398	35.7237	TNFRSF1B
100	Protein Autoubiquitination (GO:0051865)	1/71	0.0752944	0.13553	0	0	13.5429	35.0266	BRCA2
101	Response To Ionizing Radiation (GO:0010212)	1/72	0.0763152	0.136007	0	0	13.3514	34.3517	BRCA2
201	Tertiary Granule Membrane (GO:0070821)	1/72	0.0763152	0.13446	0	0	13.3514	34.3517	COPB1
342	AURKA Activation By TPX2 R-HSA-8854518	1/72	0.0763152	0.134674	0	0	13.3514	34.3517	HAUS8
263	Inositol phosphate metabolism	1/73	0.0773349	0.170824	0	0	13.1653	33.6981	MTMR6
264	Thyroid hormone synthesis	1/75	0.0793711	0.170824	0	0	12.8082	32.4512	TTF2
247	Protein Tyrosine Phosphatase Activity (GO:0004725)	1/76	0.0803876	0.107183	0	0	12.6368	31.8561	MTMR6
265	Pancreatic cancer	1/76	0.0803876	0.170824	0	0	12.6368	31.8561	BRCA2
102	Regulation Of T Cell Proliferation (GO:0042129)	1/77	0.081403	0.143652	0	0	12.4699	31.2788	TNFRSF1B
343	COPI-dependent Golgi-to-ER Retrograde Traffic R-HSA-6811434	1/78	0.0824174	0.142133	0	0	12.3074	30.7187	COPB1
103	Regulation Of Cyclin-Dependent Protein Serine/Threonine Kinase Activity (GO:0000079)	1/79	0.0834307	0.144399	0	0	12.149	30.1749	BCCIP
104	Protein Import Into Nucleus (GO:0006606)	1/79	0.0834307	0.144399	0	0	12.149	30.1749	RPL17
105	Response To Type II Interferon (GO:0034341)	1/80	0.0844429	0.144759	0	0	11.9946	29.6467	RPL13A
344	Recruitment Of NuMA To Mitotic Centrosomes R-HSA-380320	1/80	0.0844429	0.142133	0	0	11.9946	29.6467	HAUS8
345	COPI-mediated Anterograde Transport R-HSA-6807878	1/80	0.0844429	0.142133	0	0	11.9946	29.6467	COPB1
346	Centrosome Maturation R-HSA-380287	1/81	0.0854541	0.142133	0	0	11.844	29.1337	HAUS8
347	PI Metabolism R-HSA-1483255	1/82	0.0864642	0.142133	0	0	11.6972	28.6351	MTMR6
106	Positive Regulation Of Amide Metabolic Process (GO:0034250)	1/85	0.089488	0.149147	0	0	11.2778	27.2206	RPL5
107	Response To Interleukin-1 (GO:0070555)	1/85	0.089488	0.149147	0	0	11.2778	27.2206	YTHDC2
108	Mitotic Spindle Organization (GO:0007052)	1/85	0.089488	0.149147	0	0	11.2778	27.2206	BCCIP
348	Regulation Of PLK1 Activity At G2/M Transition R-HSA-2565942	1/87	0.0914987	0.146581	0	0	11.0144	26.3402	HAUS8
109	Negative Regulation Of Neuron Death (GO:1901215)	1/88	0.0925024	0.152756	0	0	10.8872	25.9173	TNFRSF1B
349	Meiosis R-HSA-1500620	1/88	0.0925024	0.146581	0	0	10.8872	25.9173	BRCA2
350	Neutrophil Degranulation R-HSA-6798695	2/468	0.0928346	0.146581	0	0	4.18712	9.95253	COPB1;TNFRSF1B
202	Specific Granule Membrane (GO:0035579)	1/90	0.0945066	0.158943	0	0	10.6415	25.1043	TNFRSF1B
110	Regulation Of RNA Metabolic Process (GO:0051252)	1/91	0.0955072	0.153955	0	0	10.5228	24.7132	TNFRSF1B
111	rRNA Metabolic Process (GO:0016072)	1/91	0.0955072	0.153955	0	0	10.5228	24.7132	RPL5
112	Positive Regulation Of Protein Catabolic Process (GO:0045732)	1/92	0.0965067	0.153955	0	0	10.4066	24.3321	TNFRSF1B
113	Positive Regulation Of Gene Expression (GO:0010628)	2/480	0.0969019	0.153955	0	0	4.0795	9.52178	RPL5;RPL17
114	Negative Regulation Of Amide Metabolic Process (GO:0034249)	1/93	0.0975051	0.153955	0	0	10.293	23.9605	RPL13A
248	mRNA 3'-UTR Binding (GO:0003730)	1/93	0.0975051	0.121734	0	0	10.293	23.9605	RPL5
115	Recombinational Repair (GO:0000725)	1/95	0.0994988	0.155737	0	0	10.0729	23.2444	BRCA2
249	Single-Stranded DNA Binding (GO:0003697)	1/96	0.100494	0.121734	0	0	9.96642	22.8994	BRCA2
266	Phosphatidylinositol signaling system	1/97	0.101488	0.17759	0	0	9.8621	22.5626	MTMR6
351	Anchoring Of Basal Body To Plasma Membrane R-HSA-5620912	1/97	0.101488	0.157659	0	0	9.8621	22.5626	HAUS8
352	Innate Immune System R-HSA-168249	3/1035	0.102479	0.157659	0	0	2.89871	6.60356	COPB1;TTF2;TNFRSF1B
116	Negative Regulation Of Macromolecule Biosynthetic Process (GO:0010558)	1/98	0.102481	0.157664	0	0	9.75994	22.2339	RPL13A
117	Phosphatidylinositol Biosynthetic Process (GO:0006661)	1/98	0.102481	0.157664	0	0	9.75994	22.2339	MTMR6
250	Protein Tyrosine Kinase Activity (GO:0004713)	1/99	0.103474	0.121734	0	0	9.65986	21.9128	PEAK1
251	Transcription Coregulator Binding (GO:0001221)	1/99	0.103474	0.121734	0	0	9.65986	21.9128	RPL17
118	ncRNA Processing (GO:0034470)	1/100	0.104465	0.159353	0	0	9.56181	21.5992	RPL5
267	Viral protein interaction with cytokine and cytokine receptor	1/100	0.104465	0.17759	0	0	9.56181	21.5992	TNFRSF1B
353	TNFR2 Non-Canonical NF-kB Pathway R-HSA-5668541	1/100	0.104465	0.158681	0	0	9.56181	21.5992	TNFRSF1B
119	rRNA Processing (GO:0006364)	1/101	0.105455	0.159511	0	0	9.46571	21.2929	RPL5
120	Intrinsic Apoptotic Signaling Pathway (GO:0097193)	1/105	0.109404	0.162138	0	0	9.09982	20.1352	TNFRSF1B
121	Regulation Of Cellular Response To Stress (GO:0080135)	1/107	0.111373	0.162138	0	0	8.92722	19.5941	BRCA2
122	Negative Regulation Of Translation (GO:0017148)	1/107	0.111373	0.162138	0	0	8.92722	19.5941	RPL13A
354	Interleukin-4 And Interleukin-13 Signaling R-HSA-6785807	1/107	0.111373	0.16706	0	0	8.92722	19.5941	TNFRSF1B
123	Response To Tumor Necrosis Factor (GO:0034612)	1/108	0.112356	0.162138	0	0	8.84335	19.3323	YTHDC2
124	Glycerophospholipid Biosynthetic Process (GO:0046474)	1/108	0.112356	0.162138	0	0	8.84335	19.3323	MTMR6
125	Cell-Matrix Adhesion (GO:0007160)	1/109	0.113338	0.162138	0	0	8.76102	19.0761	PEAK1
126	Negative Regulation Of Inflammatory Response (GO:0050728)	1/111	0.115298	0.162138	0	0	8.60087	18.5799	TNFRSF1B
127	Double-Strand Break Repair Via Homologous Recombination (GO:0000724)	1/111	0.115298	0.162138	0	0	8.60087	18.5799	BRCA2
128	Mitotic Sister Chromatid Segregation (GO:0000070)	1/111	0.115298	0.162138	0	0	8.60087	18.5799	BCCIP
129	Regulation Of Protein Serine/Threonine Kinase Activity (GO:0071900)	1/112	0.116276	0.162246	0	0	8.52295	18.3396	BCCIP
268	TNF signaling pathway	1/112	0.116276	0.1797	0	0	8.52295	18.3396	TNFRSF1B
355	Golgi-to-ER Retrograde Transport R-HSA-8856688	1/112	0.116276	0.170936	0	0	8.52295	18.3396	COPB1
356	Reproduction R-HSA-1474165	1/113	0.117254	0.170936	0	0	8.44643	18.1042	BRCA2
357	HDR Thru Homologous Recombination (HRR) Or Single Strand Annealing (SSA) R-HSA-5693567	1/114	0.118231	0.170936	0	0	8.37126	17.8736	BRCA2
130	Endoplasmic Reticulum To Golgi Vesicle-Mediated Transport (GO:0006888)	1/115	0.119206	0.165055	0	0	8.29741	17.6478	COPB1
203	Early Endosome Membrane (GO:0031901)	1/116	0.120181	0.193334	0	0	8.22484	17.4265	MON2
131	Cellular Response To Molecule Of Bacterial Origin (GO:0071219)	1/117	0.121154	0.166471	0	0	8.15353	17.2096	TNFRSF1B
132	Ribonucleoprotein Complex Biogenesis (GO:0022613)	1/118	0.122126	0.166536	0	0	8.08344	16.997	RPL5
358	Homology Directed Repair R-HSA-5693538	1/119	0.123098	0.175854	0	0	8.01453	16.7886	BRCA2
133	Regulation Of Gene Expression (GO:0010468)	3/1127	0.124076	0.167922	0	0	2.64853	5.52712	RPL5;BRCA2;RPL17
134	Positive Regulation Of Macromolecule Biosynthetic Process (GO:0010557)	1/122	0.126006	0.169261	0	0	7.81464	16.1875	RPL5
359	Regulation Of IGF Transport And Uptake By IGFBPs R-HSA-381426	1/123	0.126973	0.179256	0	0	7.7502	15.9947	TTF2
135	Protein Dephosphorylation (GO:0006470)	1/124	0.127939	0.169331	0	0	7.6868	15.8056	MTMR6
136	Cellular Response To Lipopolysaccharide (GO:0071222)	1/124	0.127939	0.169331	0	0	7.6868	15.8056	TNFRSF1B
137	Response To Cytokine (GO:0034097)	1/125	0.128905	0.169364	0	0	7.62442	15.62	YTHDC2
252	Protease Binding (GO:0002020)	1/125	0.128905	0.14732	0	0	7.62442	15.62	BRCA2
138	Cytosolic Transport (GO:0016482)	1/127	0.130832	0.17065	0	0	7.50265	15.2592	MON2
139	Regulation Of Cell Cycle Process (GO:0010564)	1/130	0.133716	0.173157	0	0	7.32706	14.7423	RPL17
360	ER To Golgi Anterograde Transport R-HSA-199977	1/133	0.13659	0.189719	0	0	7.15945	14.2528	COPB1
361	Cell Surface Interactions At Vascular Wall R-HSA-202733	1/134	0.137546	0.189719	0	0	7.10526	14.0954	TTF2
140	Positive Regulation Of Cellular Process (GO:0048522)	2/594	0.137879	0.17681	0	0	3.27466	6.48835	TNFRSF1B;RPL17
141	Non-Membrane-Bounded Organelle Assembly (GO:0140694)	1/135	0.138501	0.17681	0	0	7.05188	13.9407	HAUS8
142	Negative Regulation Of Cellular Biosynthetic Process (GO:0031327)	1/137	0.140408	0.177982	0	0	6.94748	13.6393	RPL13A
204	Mitotic Spindle (GO:0072686)	1/143	0.146106	0.225246	0	0	6.65191	12.7945	HAUS8
143	Positive Regulation Of Cellular Catabolic Process (GO:0031331)	1/146	0.148941	0.186063	0	0	6.5133	12.4027	TNFRSF1B
144	Negative Regulation Of Protein Metabolic Process (GO:0051248)	1/147	0.149884	0.186063	0	0	6.46836	12.2763	RPL13A
145	Dephosphorylation (GO:0016311)	1/147	0.149884	0.186063	0	0	6.46836	12.2763	MTMR6
269	Breast cancer	1/147	0.149884	0.212335	0	0	6.46836	12.2763	BRCA2
146	Skeletal System Development (GO:0001501)	1/149	0.151767	0.186988	0	0	6.38031	12.0295	RPL13
362	DNA Double-Strand Break Repair R-HSA-5693532	1/149	0.151767	0.206955	0	0	6.38031	12.0295	BRCA2
147	protein-RNA Complex Assembly (GO:0022618)	1/150	0.152707	0.186988	0	0	6.33717	11.909	RPL5
148	Ribosome Biogenesis (GO:0042254)	1/155	0.157392	0.191423	0	0	6.12987	11.3342	RPL5
363	Cell Cycle R-HSA-1640170	2/654	0.160821	0.216837	0	0	2.96411	5.4168	HAUS8;BRCA2
149	Response To Lipopolysaccharide (GO:0032496)	1/159	0.161123	0.194645	0	0	5.97348	10.9051	TNFRSF1B
205	Specific Granule (GO:0042581)	1/159	0.161123	0.233257	0	0	5.97348	10.9051	TNFRSF1B
150	Protein Autophosphorylation (GO:0046777)	1/162	0.16391	0.196693	0	0	5.86128	10.5998	PEAK1
206	Tertiary Granule (GO:0070820)	1/162	0.16391	0.233257	0	0	5.86128	10.5998	COPB1
364	Transport To Golgi And Subsequent Modification R-HSA-948021	1/164	0.165764	0.221019	0	0	5.78878	10.4035	COPB1
151	Regulation Of Cytokine Production (GO:0001817)	1/167	0.168537	0.200675	0	0	5.6833	10.1197	TNFRSF1B
152	Double-Strand Break Repair (GO:0006302)	1/168	0.169459	0.200675	0	0	5.64899	10.0278	BRCA2
207	Membrane Raft (GO:0045121)	1/169	0.17038	0.233484	0	0	5.61508	9.93713	TNFRSF1B
153	Neuron Differentiation (GO:0030182)	1/173	0.174056	0.204513	0	0	5.48339	9.58704	BCCIP
154	Positive Regulation Of Cellular Biosynthetic Process (GO:0031328)	1/174	0.174972	0.204513	0	0	5.45142	9.50251	RPL5
365	Intra-Golgi And Retrograde Golgi-to-ER Traffic R-HSA-6811442	1/181	0.18136	0.234814	0	0	5.23757	8.94193	COPB1
366	G2/M Transition R-HSA-69275	1/182	0.182269	0.234814	0	0	5.20837	8.86605	HAUS8
155	Protein Modification Process (GO:0036211)	2/711	0.183263	0.212821	0	0	2.71777	4.61161	PEAK1;MTMR6
208	Ficolin-1-Rich Granule (GO:0101002)	1/184	0.184084	0.236021	0	0	5.15092	8.71724	COPB1
367	Mitotic G2-G2/M Phases R-HSA-453274	1/184	0.184084	0.234814	0	0	5.15092	8.71724	HAUS8
209	Microtubule (GO:0005874)	1/185	0.18499	0.236021	0	0	5.12267	8.64428	HAUS8
368	Cilium Assembly R-HSA-5617833	1/186	0.185895	0.234814	0	0	5.09472	8.57226	HAUS8
369	Mitotic Prometaphase R-HSA-68877	1/186	0.185895	0.234814	0	0	5.09472	8.57226	HAUS8
156	Positive Regulation Of Protein Metabolic Process (GO:0051247)	1/196	0.194891	0.224467	0	0	4.83101	7.90023	RPL5
370	Peptide Ligand-Binding Receptors R-HSA-375276	1/196	0.194891	0.243613	0	0	4.83101	7.90023	TTF2
157	Golgi Vesicle Transport (GO:0048193)	1/197	0.195785	0.224467	0	0	4.80612	7.83752	COPB1
371	Phospholipid Metabolism R-HSA-1483257	1/208	0.205561	0.254302	0	0	4.54819	7.1953	MTMR6
270	Human immunodeficiency virus 1 infection	1/212	0.209088	0.273422	0	0	4.46107	6.98158	TNFRSF1B
372	G Alpha (Q) Signaling Events R-HSA-416476	1/212	0.209088	0.256026	0	0	4.46107	6.98158	TTF2
158	Cellular Response To Lipid (GO:0071396)	1/228	0.223045	0.254102	0	0	4.14328	6.21649	TNFRSF1B
159	Negative Regulation Of Multicellular Organismal Process (GO:0051241)	1/231	0.225636	0.255437	0	0	4.08861	6.08726	BRCA2
253	Microtubule Binding (GO:0008017)	1/239	0.232504	0.258338	0	0	3.94958	5.76183	HAUS8
160	Regulation Of Inflammatory Response (GO:0050727)	1/240	0.233359	0.262529	0	0	3.93286	5.723	TNFRSF1B
373	Platelet Activation, Signaling And Aggregation R-HSA-76002	1/254	0.245226	0.297244	0	0	3.71259	5.21832	TTF2
374	Organelle Biogenesis And Maintenance R-HSA-1852241	1/275	0.262699	0.315239	0	0	3.4244	4.57755	HAUS8
254	ATP Binding (GO:0005524)	1/279	0.265983	0.28755	0	0	3.37444	4.46885	PEAK1
375	Asparagine N-linked Glycosylation R-HSA-446203	1/282	0.268437	0.318935	0	0	3.33791	4.38981	COPB1
161	DNA Repair (GO:0006281)	1/291	0.275752	0.308294	0	0	3.23284	4.16472	BRCA2
271	Cytokine-cytokine receptor interaction	1/295	0.278981	0.338762	0	0	3.18821	4.07011	TNFRSF1B
162	Regulation Of Intracellular Signal Transduction (GO:1902531)	1/297	0.28059	0.311766	0	0	3.16634	4.02399	RPL5
210	Early Endosome (GO:0005769)	1/307	0.288584	0.35592	0	0	3.06131	3.8045	MON2
163	Cellular Response To Cytokine Stimulus (GO:0071345)	1/308	0.289379	0.31956	0	0	3.05119	3.78353	RPL13A
255	Adenyl Ribonucleotide Binding (GO:0032559)	1/309	0.290173	0.305445	0	0	3.04113	3.76272	PEAK1
376	DNA Repair R-HSA-73894	1/310	0.290966	0.342313	0	0	3.03113	3.74208	BRCA2
211	Actin Cytoskeleton (GO:0015629)	1/327	0.304319	0.36322	0	0	2.87058	3.41507	PEAK1
377	Class A/1 (Rhodopsin-like Receptors) R-HSA-373076	1/327	0.304319	0.354547	0	0	2.87058	3.41507	TTF2
164	Negative Regulation Of Gene Expression (GO:0010629)	1/336	0.311291	0.341661	0	0	2.79218	3.25855	RPL13A
212	Endosome Membrane (GO:0010008)	1/361	0.330309	0.38192	0	0	2.59497	2.87452	MON2
272	Amyotrophic lateral sclerosis	1/364	0.332557	0.376898	0	0	2.57313	2.83287	TNFRSF1B
378	M Phase R-HSA-68886	1/380	0.344427	0.397415	0	0	2.4625	2.62471	HAUS8
165	DNA Damage Response (GO:0006974)	1/384	0.347362	0.378941	0	0	2.43628	2.57609	TNFRSF1B
213	Cytoplasmic Vesicle Membrane (GO:0030659)	1/389	0.351014	0.393561	0	0	2.40427	2.5171	COPB1
379	Immune System R-HSA-168256	3/1943	0.362155	0.413891	0	0	1.4681	1.49112	COPB1;TTF2;TNFRSF1B
166	Cellular Response To Oxygen-Containing Compound (GO:1901701)	1/406	0.363285	0.393924	0	0	2.30135	2.33027	TNFRSF1B
214	Golgi Membrane (GO:0000139)	1/427	0.378138	0.411504	0	0	2.18556	2.12544	COPB1
167	Phosphorylation (GO:0016310)	1/429	0.379536	0.40908	0	0	2.17512	2.10727	PEAK1
168	Protein Ubiquitination (GO:0016567)	1/434	0.383016	0.410374	0	0	2.14946	2.06279	BRCA2
380	RHO GTPase Cycle R-HSA-9012999	1/441	0.387856	0.439082	0	0	2.1145	2.00269	PEAK1
169	Regulation Of Nucleic Acid-Templated Transcription (GO:1903506)	1/452	0.395389	0.421125	0	0	2.06177	1.91308	BRCA2
381	Signaling By Interleukins R-HSA-449147	1/453	0.39607	0.443846	0	0	2.0571	1.90521	TNFRSF1B
382	GPCR Ligand Binding R-HSA-500792	1/458	0.399461	0.443846	0	0	2.03407	1.86654	TTF2
170	Positive Regulation Of DNA-templated Transcription (GO:0045893)	2/1243	0.400959	0.424544	0	0	1.50983	1.37983	EIF5A;BRCA2
273	Pathways of neurodegeneration	1/475	0.410856	0.436535	0	0	1.95941	1.74292	TNFRSF1B
256	Purine Ribonucleoside Triphosphate Binding (GO:0035639)	1/476	0.41152	0.422072	0	0	1.95519	1.73601	PEAK1
171	Positive Regulation Of Cell Population Proliferation (GO:0008284)	1/483	0.416147	0.438049	0	0	1.9261	1.68865	RPL17
172	Protein Phosphorylation (GO:0006468)	1/500	0.427239	0.447111	0	0	1.85886	1.5808	PEAK1
383	Cell Cycle, Mitotic R-HSA-69278	1/523	0.441927	0.486525	0	0	1.77486	1.44937	HAUS8
173	Positive Regulation Of Intracellular Signal Transduction (GO:1902533)	1/525	0.443187	0.461119	0	0	1.7679	1.43866	RPL17
274	Pathways in cancer	1/531	0.446951	0.446951	0	0	1.74735	1.40715	BRCA2
384	Post-translational Protein Modification R-HSA-597592	2/1383	0.455557	0.496971	0	0	1.34663	1.05877	COPB1;TTF2
174	Positive Regulation Of Nucleic Acid-Templated Transcription (GO:1903508)	1/557	0.462982	0.478947	0	0	1.66341	1.28094	BRCA2
385	Hemostasis R-HSA-109582	1/576	0.474416	0.512882	0	0	1.60687	1.1982	TTF2
215	Cytoskeleton (GO:0005856)	1/599	0.487945	0.515828	0	0	1.54324	1.10735	PEAK1
386	Membrane Trafficking R-HSA-199991	1/599	0.487945	0.522799	0	0	1.54324	1.10735	COPB1
387	GPCR Downstream Signaling R-HSA-388396	1/619	0.49944	0.530379	0	0	1.49176	1.03568	TTF2
388	Vesicle-mediated Transport R-HSA-5653656	1/637	0.509574	0.535786	0	0	1.44819	0.976341	COPB1
389	Signaling By Rho GTPases R-HSA-194315	1/644	0.513462	0.535786	0	0	1.4319	0.954479	PEAK1
390	Signaling By Rho GTPases, Miro GTPases And RHOBTB3 R-HSA-9716542	1/660	0.522238	0.540246	0	0	1.39598	0.906875	PEAK1
391	Signaling By GPCR R-HSA-372790	1/689	0.537761	0.55155	0	0	1.33513	0.828237	TTF2
392	Cytokine Signaling In Immune System R-HSA-1280215	1/702	0.544562	0.553792	0	0	1.30949	0.795872	TNFRSF1B
393	Metabolism Of Lipids R-HSA-556833	1/732	0.559895	0.5646	0	0	1.25379	0.727208	MTMR6
175	Negative Regulation Of Transcription By RNA Polymerase II (GO:0000122)	1/763	0.575221	0.589783	0	0	1.20085	0.664072	RPL17
176	Regulation Of Cell Population Proliferation (GO:0042127)	1/766	0.576676	0.589783	0	0	1.19595	0.658341	RPL17
216	Endoplasmic Reticulum Membrane (GO:0005789)	1/801	0.593312	0.601623	0	0	1.14155	0.595927	COPB1
217	Bounding Membrane Of Organelle (GO:0098588)	1/819	0.601623	0.601623	0	0	1.11538	0.566751	COPB1
257	DNA Binding (GO:0003677)	1/846	0.613786	0.613786	0	0	1.07822	0.526288	BRCA2
177	Positive Regulation Of Transcription By RNA Polymerase II (GO:0045944)	1/938	0.652624	0.663685	0	0	0.967678	0.412961	EIF5A
178	Regulation Of Transcription By RNA Polymerase II (GO:0006357)	2/2028	0.668752	0.676266	0	0	0.886081	0.356507	EIF5A;RPL17
179	Negative Regulation Of DNA-templated Transcription (GO:0045892)	1/1025	0.685899	0.689731	0	0	0.881417	0.332316	RPL17
394	Signal Transduction R-HSA-162582	2/2465	0.773554	0.773554	0	0	0.711125	0.182588	PEAK1;TTF2
180	Regulation Of DNA-templated Transcription (GO:0006355)	1/1922	0.891827	0.891827	0	0	0.447609	0.0512438	BRCA2

## Sheet: Cluster3
	Term	Overlap	P.value	Adjusted.P.value	Old.P.value	Old.Adjusted.P.value	Odds.Ratio	Combined.Score	Genes
620	RHO GTPase Cycle R-HSA-9012999	9/441	5.40944e-09	6.32588e-07	0	0	21.4254	407.836	ABI2;WIPF2;CLTC;ARHGEF16;ABL2;ARHGAP29;OCRL;WASF1;WASF2
621	Signaling By Rho GTPases R-HSA-194315	10/644	8.68372e-09	6.32588e-07	0	0	16.9453	314.536	ABI2;WIPF2;CLTC;ARHGEF16;ABL2;ARHGAP29;OCRL;WASF1;WASF2;CKAP5
622	Signaling By Rho GTPases, Miro GTPases And RHOBTB3 R-HSA-9716542	10/660	1.09697e-08	6.32588e-07	0	0	16.5145	302.68	ABI2;WIPF2;CLTC;ARHGEF16;ABL2;ARHGAP29;OCRL;WASF1;WASF2;CKAP5
623	RAC1 GTPase Cycle R-HSA-9013149	6/178	1.46233e-07	5.07744e-06	0	0	31.3953	494.102	ABI2;WIPF2;ABL2;ARHGAP29;WASF1;WASF2
624	RHO GTPases Activate WASPs And WAVEs R-HSA-5663213	4/36	1.75467e-07	5.07744e-06	0	0	103.854	1615.54	ABI2;WIPF2;WASF1;WASF2
625	RAC3 GTPase Cycle R-HSA-9013423	5/93	1.76096e-07	5.07744e-06	0	0	49.1206	763.934	ABI2;ABL2;OCRL;WASF1;WASF2
484	Cadherin Binding (GO:0045296)	7/319	2.18346e-07	2.16162e-05	0	0	21.0043	322.146	PCMT1;HSPA8;ARHGEF16;HDLBP;PDLIM5;WASF2;CKAP5
626	Golgi Associated Vesicle Biogenesis R-HSA-432722	4/55	9.97589e-07	2.46547e-05	0	0	65.1013	899.565	HSPA8;AP1G1;CLTC;OCRL
627	FCGR3A-mediated Phagocytosis R-HSA-9664422	4/60	1.41951e-06	3.06969e-05	0	0	59.2738	798.134	ABI2;WIPF2;WASF1;WASF2
628	Regulation Of Actin Dynamics For Phagocytic Cup Formation R-HSA-2029482	4/62	1.62078e-06	3.11549e-05	0	0	57.2241	762.947	ABI2;WIPF2;WASF1;WASF2
629	trans-Golgi Network Vesicle Budding R-HSA-199992	4/71	2.79872e-06	4.84179e-05	0	0	49.5149	633.115	HSPA8;AP1G1;CLTC;OCRL
411	Coated Vesicle (GO:0030135)	4/79	4.29473e-06	0.000313515	0	0	44.2156	546.421	AP1G1;CLTC;OCRL;HSPD1
630	Fcgamma Receptor (FCGR) Dependent Phagocytosis R-HSA-2029480	4/87	6.31379e-06	9.92987e-05	0	0	39.9378	478.166	ABI2;WIPF2;WASF1;WASF2
485	Small GTPase Binding (GO:0031267)	5/199	7.56588e-06	0.000374511	0	0	22.1627	261.34	ABI2;AP1G1;ARHGEF16;OCRL;WASF1
486	GTPase Binding (GO:0051020)	5/225	1.37153e-05	0.000452606	0	0	19.5178	218.541	ABI2;AP1G1;ARHGEF16;OCRL;WASF1
631	Lysosome Vesicle Biogenesis R-HSA-432720	3/34	1.42827e-05	0.000205909	0	0	77.191	861.178	HSPA8;AP1G1;CLTC
412	Cytoskeleton (GO:0005856)	7/599	1.42833e-05	0.000521342	0	0	10.9122	121.741	MTUS1;ABL2;MAPT;PDLIM5;WASF1;WASF2;CKAP5
1	Axo-Dendritic Transport (GO:0008088)	2/5	1.88508e-05	0.00772882	0	0	512.026	5570.3	HSPA8;MAPT
632	RHO GTPase Effectors R-HSA-195258	5/269	3.23493e-05	0.000430495	0	0	16.2286	167.786	ABI2;WIPF2;WASF1;WASF2;CKAP5
2	Positive Regulation Of Arp2/3 Complex-Mediated Actin Nucleation (GO:2000601)	2/7	3.95183e-05	0.00810126	0	0	307.185	3114.47	WASF1;WASF2
413	Early Endosome (GO:0005769)	5/307	6.06633e-05	0.00147614	0	0	14.1592	137.489	PRDX3;AP1G1;LNPEP;OCRL;HSPD1
487	SH3 Domain Binding (GO:0017124)	3/59	7.57975e-05	0.00187599	0	0	42.6771	404.897	ABI2;MAPT;WASF2
3	Positive Regulation Of Actin Nucleation (GO:0051127)	2/10	8.44629e-05	0.00945495	0	0	191.962	1800.45	WASF1;WASF2
4	Protein Polymerization (GO:0051258)	3/63	9.22434e-05	0.00945495	0	0	39.824	370.008	MAPT;WASF1;CKAP5
414	Microtubule Cytoskeleton (GO:0015630)	5/342	0.000100968	0.00184267	0	0	12.6661	116.537	CLTC;MTUS1;MAPT;CKAP5;CCAR2
583	Bacterial invasion of epithelial cells	3/77	0.000167705	0.00620509	0	0	32.267	280.507	CLTC;WASF1;WASF2
415	Clathrin-Coated Vesicle (GO:0030136)	3/78	0.00017425	0.00254405	0	0	31.8352	275.534	AP1G1;CLTC;OCRL
416	Clathrin-Coated Vesicle Membrane (GO:0030665)	3/90	0.000266079	0.0032373	0	0	27.4276	225.776	HSPA8;AP1G1;CLTC
633	VEGFA-VEGFR2 Pathway R-HSA-4420097	3/93	0.000293082	0.00362165	0	0	26.5093	215.655	ABI2;WASF1;WASF2
634	Leishmania Infection R-HSA-9658195	4/247	0.000368147	0.00415783	0	0	13.5316	106.994	ABI2;WIPF2;WASF1;WASF2
635	Signaling By VEGF R-HSA-194138	3/102	0.000384539	0.00415783	0	0	24.0885	189.419	ABI2;WASF1;WASF2
5	Cellular Response To Nerve Growth Factor Stimulus (GO:1990090)	2/21	0.000390426	0.0241971	0	0	80.7814	633.994	MAPT;WASF1
488	Protein Kinase A Regulatory Subunit Binding (GO:0034237)	2/22	0.000429098	0.00738125	0	0	76.7385	595.017	WASF1;WASF2
489	Lipoprotein Particle Binding (GO:0071813)	2/23	0.000469558	0.00738125	0	0	73.0806	560.069	MAPT;HSPD1
6	Regulation Of Supramolecular Fiber Organization (GO:1902903)	2/24	0.000511802	0.0241971	0	0	69.7552	528.575	HSPA8;MAPT
490	RNA Binding (GO:0003723)	8/1411	0.000521907	0.00738125	0	0	5.29408	40.0128	TCERG1;HSPA8;CLTC;HDLBP;MAPT;ZNF598;CCAR2;HSPD1
7	Regulation Of Postsynapse Organization (GO:0099175)	2/25	0.000555825	0.0241971	0	0	66.7191	500.063	TANC1;PDLIM5
8	Regulation Of Synapse Organization (GO:0050807)	2/25	0.000555825	0.0241971	0	0	66.7191	500.063	TANC1;PDLIM5
9	Receptor-Mediated Endocytosis (GO:0006898)	3/122	0.000648963	0.0241971	0	0	20.0198	146.948	CLTC;OCRL;WASF1
10	Microtubule Polymerization Or Depolymerization (GO:0031109)	2/27	0.000649191	0.0241971	0	0	61.3754	450.482	MAPT;CKAP5
11	Clathrin-Dependent Endocytosis (GO:0072583)	2/27	0.000649191	0.0241971	0	0	61.3754	450.482	CLTC;OCRL
12	Positive Regulation Of Microtubule Polymerization (GO:0031116)	2/29	0.000749618	0.0253086	0	0	56.8234	408.898	MAPT;CKAP5
13	Regulation Of Arp2/3 Complex-Mediated Actin Nucleation (GO:0034315)	2/30	0.000802468	0.0253086	0	0	54.7912	390.542	WASF1;WASF2
636	Immune System R-HSA-168256	9/1943	0.000942727	0.00959363	0	0	4.41795	30.7787	HSPA8;ABI2;AP1G1;WIPF2;CLTC;ABL2;LNPEP;WASF1;WASF2
637	Clathrin-mediated Endocytosis R-HSA-8856828	3/142	0.00100788	0.00968681	0	0	17.122	118.14	HSPA8;CLTC;OCRL
14	Apoptotic Mitochondrial Changes (GO:0008637)	2/34	0.00103133	0.0273043	0	0	47.9327	329.628	CCAR2;HSPD1
15	Microtubule Polymerization (GO:0046785)	2/34	0.00103133	0.0273043	0	0	47.9327	329.628	MAPT;CKAP5
417	Actin Cytoskeleton (GO:0015629)	4/327	0.00105355	0.010987	0	0	10.1388	69.5074	ABL2;PDLIM5;WASF1;WASF2
16	Protein-Containing Complex Assembly (GO:0065003)	4/328	0.00106554	0.0273043	0	0	10.107	69.1751	CLTC;MAPT;WASF1;HSPD1
638	Plasma Lipoprotein Clearance R-HSA-8964043	2/35	0.00109289	0.00995107	0	0	46.4779	316.929	CLTC;HDLBP
639	CDC42 GTPase Cycle R-HSA-9013148	3/149	0.00115797	0.0100164	0	0	16.2953	110.174	WIPF2;ARHGEF16;ARHGAP29
17	Negative Regulation Of Transferase Activity (GO:0051348)	2/37	0.00122119	0.0294522	0	0	43.8176	293.925	PRDX3;MAPT
640	Signal Transduction R-HSA-162582	10/2465	0.00126682	0.0103418	0	0	3.96402	26.445	ABI2;WIPF2;CLTC;ARHGEF16;ABL2;ARHGAP29;OCRL;WASF1;WASF2;CKAP5
641	Membrane Trafficking R-HSA-199991	5/599	0.00131514	0.0103418	0	0	7.09193	47.0466	HSPA8;AP1G1;CLTC;LNPEP;OCRL
18	Regulation Of Mitochondrial Membrane Potential (GO:0051881)	2/39	0.00135636	0.030895	0	0	41.4449	273.659	PRDX3;MAPT
418	Lysosomal Membrane (GO:0005765)	4/356	0.00144153	0.013154	0	0	9.28977	60.7742	HSPA8;AP1G1;CLTC;LNPEP
19	Mitochondrion Organization (GO:0007005)	3/162	0.0014727	0.0317794	0	0	14.9532	97.5047	PRDX3;WASF1;HSPD1
20	Response To Unfolded Protein (GO:0006986)	2/44	0.00172414	0.0353449	0	0	36.5018	232.262	HSPA8;HSPD1
642	Vesicle-mediated Transport R-HSA-5653656	5/637	0.00172591	0.0129818	0	0	6.65245	42.3229	HSPA8;AP1G1;CLTC;LNPEP;OCRL
643	Infectious Disease R-HSA-5663205	6/961	0.00183721	0.0132432	0	0	5.43084	34.2116	ABI2;AP1G1;WIPF2;CLTC;WASF1;WASF2
491	Actin Binding (GO:0003779)	3/183	0.0020861	0.0258155	0	0	13.1947	81.4435	ABL2;MAPT;PDLIM5
21	Actin Polymerization Or Depolymerization (GO:0008154)	2/53	0.00249203	0.0486539	0	0	30.0468	180.12	ABI2;WASF1
584	Pathogenic Escherichia coli infection	3/197	0.00257167	0.0316404	0	0	12.2338	72.9527	WIPF2;WASF1;WASF2
644	RHOJ GTPase Cycle R-HSA-9013409	2/54	0.00258564	0.0178926	0	0	29.4675	175.561	WIPF2;OCRL
419	Extracellular Membrane-Bounded Organelle (GO:0065010)	2/57	0.00287632	0.023226	0	0	27.8559	162.992	PCMT1;CLTC
585	Legionellosis	2/57	0.00287632	0.0316404	0	0	27.8559	162.992	HSPA8;HSPD1
420	Extracellular Vesicle (GO:1903561)	2/60	0.00318165	0.023226	0	0	26.4111	151.873	PCMT1;CLTC
22	Negative Regulation Of Kinase Activity (GO:0033673)	2/62	0.00339329	0.0622951	0	0	25.5282	145.152	PRDX3;MAPT
492	PDZ Domain Binding (GO:0030165)	2/62	0.00339329	0.0368555	0	0	25.5282	145.152	ARHGEF16;ARHGAP29
586	Regulation of actin cytoskeleton	3/218	0.00342229	0.0316404	0	0	11.0272	62.6061	ABI2;WASF1;WASF2
23	Regulation Of Cellular Catabolic Process (GO:0031329)	2/63	0.00350152	0.0622951	0	0	25.1084	141.977	ABL2;MAPT
493	Double-Stranded RNA Binding (GO:0003725)	2/65	0.00372278	0.0368555	0	0	24.3089	135.967	CLTC;HSPD1
24	Response To Reactive Oxygen Species (GO:0000302)	2/66	0.00383581	0.0622951	0	0	23.9279	133.12	PRDX3;MAPT
25	Activation Of Cysteine-Type Endopeptidase Activity Involved In Apoptotic Process (GO:0006919)	2/67	0.00395042	0.0622951	0	0	23.5586	130.372	MAPT;HSPD1
26	Peptidyl-Tyrosine Phosphorylation (GO:0018108)	2/67	0.00395042	0.0622951	0	0	23.5586	130.372	ABI2;ABL2
587	Adherens junction	2/71	0.00442468	0.0316404	0	0	22.1884	120.274	WASF1;WASF2
645	Plasma Lipoprotein Assembly, Remodeling, And Clearance R-HSA-174824	2/71	0.00442468	0.0294412	0	0	22.1884	120.274	CLTC;HDLBP
494	Microtubule Binding (GO:0008017)	3/239	0.00442755	0.0398479	0	0	10.0353	54.3902	MTUS1;MAPT;CKAP5
421	trans-Golgi Network (GO:0005802)	3/241	0.00453165	0.0300737	0	0	9.94992	53.6964	AP1G1;CLTC;OCRL
27	Cellular Response To Reactive Oxygen Species (GO:0034614)	2/73	0.00467124	0.0709336	0	0	21.5612	115.705	PRDX3;MAPT
646	Signaling By Receptor Tyrosine Kinases R-HSA-9006934	4/496	0.00477151	0.030573	0	0	6.59892	35.2718	ABI2;CLTC;WASF1;WASF2
28	Negative Regulation Of Phosphorylation (GO:0042326)	2/75	0.00492403	0.0715075	0	0	20.9684	111.418	PRDX3;MAPT
422	Lysosome (GO:0005764)	4/503	0.00501368	0.0304999	0	0	6.50401	34.4425	HSPA8;AP1G1;CLTC;LNPEP
588	Endocytosis	3/252	0.00513087	0.0316404	0	0	9.50506	50.1152	HSPA8;WIPF2;CLTC
495	Protein Kinase Binding (GO:0019901)	4/511	0.00530048	0.0414394	0	0	6.39875	33.5292	PRDX3;CLTC;MAPT;PDLIM5
29	Regulation Of Protein Localization To Plasma Membrane (GO:1903076)	2/80	0.00558306	0.0715075	0	0	19.6193	101.785	CLTC;ARHGEF16
647	Regulation Of HSF1-mediated Heat Shock Response R-HSA-3371453	2/81	0.00571947	0.0353381	0	0	19.37	100.024	HSPA8;CCAR2
496	Ubiquitin Protein Ligase Binding (GO:0031625)	3/271	0.00627441	0.0414394	0	0	8.82269	44.7423	HSPA8;ABI2;HSPD1
30	Regulation Of Kinase Activity (GO:0043549)	2/85	0.00628031	0.0715075	0	0	18.4328	93.4605	PRDX3;MAPT
423	Clathrin-Coated Endocytic Vesicle (GO:0045334)	2/85	0.00628031	0.0352664	0	0	18.4328	93.4605	CLTC;OCRL
648	RAC2 GTPase Cycle R-HSA-9013404	2/87	0.0065698	0.0389587	0	0	17.9973	90.4412	ABI2;WASF2
31	Regulation Of Vesicle-Mediated Transport (GO:0060627)	2/89	0.00686529	0.0715075	0	0	17.5818	87.5798	ABL2;OCRL
32	Regulation Of Establishment Of T Cell Polarity (GO:1903903)	1/5	0.00698104	0.0715075	0	0	184.889	917.891	ABL2
33	Regulation Of Hyaluronan Biosynthetic Process (GO:1900125)	1/5	0.00698104	0.0715075	0	0	184.889	917.891	CLTC
34	Negative Regulation Of Sequestering Of Triglyceride (GO:0010891)	1/5	0.00698104	0.0715075	0	0	184.889	917.891	OSBPL8
35	Inclusion Body Assembly (GO:0070841)	1/5	0.00698104	0.0715075	0	0	184.889	917.891	MAPT
36	Protein Repair (GO:0030091)	1/5	0.00698104	0.0715075	0	0	184.889	917.891	PCMT1
37	Protein Targeting To Vacuole Involved In Autophagy (GO:0071211)	1/5	0.00698104	0.0715075	0	0	184.889	917.891	HSPA8
38	Plus-End-Directed Organelle Transport Along Microtubule (GO:0072386)	1/5	0.00698104	0.0715075	0	0	184.889	917.891	MAPT
39	Positive Regulation Of T Cell Mediated Immune Response To Tumor Cell (GO:0002842)	1/5	0.00698104	0.0715075	0	0	184.889	917.891	HSPD1
40	Negative Regulation Of Axon Regeneration (GO:0048681)	1/5	0.00698104	0.0715075	0	0	184.889	917.891	OCRL
497	High-Density Lipoprotein Particle Binding (GO:0008035)	1/5	0.00698104	0.0414394	0	0	184.889	917.891	HSPD1
498	C3HC4-type RING Finger Domain Binding (GO:0055131)	1/5	0.00698104	0.0414394	0	0	184.889	917.891	HSPA8
499	Protein Carboxyl O-methyltransferase Activity (GO:0051998)	1/5	0.00698104	0.0414394	0	0	184.889	917.891	PCMT1
649	TFAP2A Acts As A Transcriptional Repressor During Retinoic Acid Induced Cell Differentiation R-HSA-8869496	1/5	0.00698104	0.0389587	0	0	184.889	917.891	HSPD1
650	HDL Clearance R-HSA-8964011	1/5	0.00698104	0.0389587	0	0	184.889	917.891	HDLBP
424	Lytic Vacuole Membrane (GO:0098852)	3/287	0.00734697	0.0383092	0	0	8.31887	40.8745	HSPA8;AP1G1;LNPEP
500	Ubiquitin-Like Protein Ligase Binding (GO:0044389)	3/289	0.00748822	0.0414394	0	0	8.25986	40.4273	HSPA8;ABI2;HSPD1
501	Single-Stranded DNA Binding (GO:0003697)	2/96	0.00794625	0.0414394	0	0	16.2668	78.6508	MAPT;HSPD1
589	Fc gamma R-mediated phagocytosis	2/97	0.00810656	0.038241	0	0	16.0947	77.4975	WASF1;WASF2
41	RNA Splicing (GO:0008380)	2/98	0.00826832	0.0715075	0	0	15.9263	76.3717	TCERG1;CCAR2
590	Choline metabolism in cancer	2/98	0.00826832	0.038241	0	0	15.9263	76.3717	WASF1;WASF2
42	Negative Regulation Of Establishment Of Protein Localization To Mitochondrion (GO:1903748)	1/6	0.00837161	0.0715075	0	0	147.904	707.41	MAPT
43	Positive Regulation Of Immune Response To Tumor Cell (GO:0002839)	1/6	0.00837161	0.0715075	0	0	147.904	707.41	HSPD1
44	Negative Regulation Of Neuron Projection Regeneration (GO:0070571)	1/6	0.00837161	0.0715075	0	0	147.904	707.41	OCRL
45	Antigen Processing And Presentation Of Exogenous Peptide Antigen Via MHC Class I (GO:0042590)	1/6	0.00837161	0.0715075	0	0	147.904	707.41	LNPEP
46	Clathrin Coat Disassembly (GO:0072318)	1/6	0.00837161	0.0715075	0	0	147.904	707.41	HSPA8
47	Regulation Of T Cell Mediated Immune Response To Tumor Cell (GO:0002840)	1/6	0.00837161	0.0715075	0	0	147.904	707.41	HSPD1
48	Ribosome-Associated Ubiquitin-Dependent Protein Catabolic Process (GO:1990116)	1/6	0.00837161	0.0715075	0	0	147.904	707.41	ZNF598
502	Clathrin Light Chain Binding (GO:0032051)	1/6	0.00837161	0.0414394	0	0	147.904	707.41	CLTC
503	Minor Groove Of Adenine-Thymine-Rich DNA Binding (GO:0003680)	1/6	0.00837161	0.0414394	0	0	147.904	707.41	MAPT
651	Protein Repair R-HSA-5676934	1/6	0.00837161	0.0416759	0	0	147.904	707.41	PCMT1
652	Entry Of Influenza Virion Into Host Cell Via Endocytosis R-HSA-168275	1/6	0.00837161	0.0416759	0	0	147.904	707.41	CLTC
653	L1CAM Interactions R-HSA-373760	2/99	0.00843154	0.0416759	0	0	15.7613	75.2724	HSPA8;CLTC
654	Cellular Response To Heat Stress R-HSA-3371556	2/99	0.00843154	0.0416759	0	0	15.7613	75.2724	HSPA8;CCAR2
425	trans-Golgi Network Membrane (GO:0032588)	2/100	0.00859621	0.0418349	0	0	15.5997	74.1989	AP1G1;CLTC
49	Activation Of GTPase Activity (GO:0090630)	2/102	0.00892988	0.074325	0	0	15.2862	72.1255	ARHGEF16;ARHGAP29
655	MHC Class II Antigen Presentation R-HSA-2132295	2/104	0.0092693	0.0445441	0	0	14.9849	70.1451	AP1G1;CLTC
50	Regulation Of Establishment Of Protein Localization To Mitochondrion (GO:1903747)	1/7	0.00976029	0.074325	0	0	123.247	570.563	MAPT
51	Negative Regulation Of Mitochondrial Membrane Potential (GO:0010917)	1/7	0.00976029	0.074325	0	0	123.247	570.563	MAPT
52	Cardiac Muscle Hypertrophy (GO:0003300)	1/7	0.00976029	0.074325	0	0	123.247	570.563	OCRL
53	Phosphatidylserine Acyl-Chain Remodeling (GO:0036150)	1/7	0.00976029	0.074325	0	0	123.247	570.563	OSBPL8
426	Clathrin-Sculpted Gamma-Aminobutyric Acid Transport Vesicle (GO:0061200)	1/7	0.00976029	0.0419118	0	0	123.247	570.563	HSPA8
427	Clathrin-Sculpted Gamma-Aminobutyric Acid Transport Vesicle Membrane (GO:0061202)	1/7	0.00976029	0.0419118	0	0	123.247	570.563	HSPA8
504	Phosphatidylinositol Phosphate 4-Phosphatase Activity (GO:0034596)	1/7	0.00976029	0.0418391	0	0	123.247	570.563	OCRL
505	Phosphatidylinositol-4,5-Bisphosphate 5-Phosphatase Activity (GO:0004439)	1/7	0.00976029	0.0418391	0	0	123.247	570.563	OCRL
54	Positive Regulation Of T Cell Activation (GO:0050870)	2/107	0.00978915	0.074325	0	0	14.5546	67.3365	ABL2;HSPD1
506	Tubulin Binding (GO:0015631)	3/322	0.0100549	0.0418391	0	0	7.39298	34.0054	MTUS1;MAPT;CKAP5
55	Positive Regulation Of Cysteine-Type Endopeptidase Activity Involved In Apoptotic Process (GO:0043280)	2/109	0.0101428	0.0755609	0	0	14.2811	65.5644	MAPT;HSPD1
507	Phosphatidylinositol Phosphate Binding (GO:1901981)	2/109	0.0101428	0.0418391	0	0	14.2811	65.5644	OSBPL8;MAPT
56	Negative Regulation Of Membrane Potential (GO:0045837)	1/8	0.0111471	0.0755609	0	0	105.635	474.995	MAPT
57	Regulation Of Macrophage Migration (GO:1905521)	1/8	0.0111471	0.0755609	0	0	105.635	474.995	MTUS1
58	Internal Protein Amino Acid Acetylation (GO:0006475)	1/8	0.0111471	0.0755609	0	0	105.635	474.995	MAPT
59	Nucleic Acid Transport (GO:0050657)	1/8	0.0111471	0.0755609	0	0	105.635	474.995	CKAP5
60	Mitochondrial Fragmentation Involved In Apoptotic Process (GO:0043653)	1/8	0.0111471	0.0755609	0	0	105.635	474.995	CCAR2
656	Role Of ABL In ROBO-SLIT Signaling R-HSA-428890	1/8	0.0111471	0.0521202	0	0	105.635	474.995	ABL2
61	Cellular Response To Oxidative Stress (GO:0034599)	2/117	0.0116135	0.0755609	0	0	13.2823	59.1803	PRDX3;MAPT
62	Negative Regulation Of Establishment Of Protein Localization (GO:1904950)	1/9	0.012532	0.0755609	0	0	92.4259	404.776	MAPT
63	Transferrin Transport (GO:0033572)	1/9	0.012532	0.0755609	0	0	92.4259	404.776	CLTC
64	Regulation Of Long-Term Synaptic Depression (GO:1900452)	1/9	0.012532	0.0755609	0	0	92.4259	404.776	MAPT
65	Positive Regulation Of Receptor Recycling (GO:0001921)	1/9	0.012532	0.0755609	0	0	92.4259	404.776	OCRL
66	Negative Regulation Of Tyrosine Phosphorylation Of STAT Protein (GO:0042532)	1/9	0.012532	0.0755609	0	0	92.4259	404.776	OCRL
67	Peptidyl-Cysteine Modification (GO:0018198)	1/9	0.012532	0.0755609	0	0	92.4259	404.776	PRDX3
68	Mitochondrion Morphogenesis (GO:0070584)	1/9	0.012532	0.0755609	0	0	92.4259	404.776	WASF1
508	Phosphatidylinositol-4,5-Bisphosphate Phosphatase Activity (GO:0106019)	1/9	0.012532	0.0496269	0	0	92.4259	404.776	OCRL
657	Formation Of Annular Gap Junctions R-HSA-196025	1/9	0.012532	0.0542011	0	0	92.4259	404.776	CLTC
658	Lipophagy R-HSA-9613354	1/9	0.012532	0.0542011	0	0	92.4259	404.776	HSPA8
659	CHL1 Interactions R-HSA-447041	1/9	0.012532	0.0542011	0	0	92.4259	404.776	HSPA8
69	Regulation Of Cell Motility (GO:2000145)	2/123	0.0127745	0.0759066	0	0	12.6198	55.0263	ABL2;OCRL
428	Mitochondrial Matrix (GO:0005759)	3/355	0.0130783	0.0530396	0	0	6.68864	29.0073	PRDX3;CCAR2;HSPD1
660	Innate Immune System R-HSA-168249	5/1035	0.0133745	0.0547117	0	0	3.99789	17.2485	HSPA8;ABI2;WIPF2;WASF1;WASF2
70	Cytosolic Transport (GO:0016482)	2/127	0.0135757	0.0770973	0	0	12.2135	52.5118	AP1G1;CLTC
71	Regulation Of Anatomical Structure Morphogenesis (GO:0022603)	2/127	0.0135757	0.0770973	0	0	12.2135	52.5118	MAPT;PDLIM5
591	Lysosome	2/128	0.0137793	0.0566483	0	0	12.116	51.912	AP1G1;CLTC
72	Regulation Of Microtubule Nucleation (GO:0010968)	1/10	0.0139151	0.0770973	0	0	82.1523	351.183	CKAP5
73	Protein Oxidation (GO:0018158)	1/10	0.0139151	0.0770973	0	0	82.1523	351.183	PRDX3
74	Regulation Of Axon Regeneration (GO:0048679)	1/10	0.0139151	0.0770973	0	0	82.1523	351.183	OCRL
509	Inositol Trisphosphate Phosphatase Activity (GO:0046030)	1/10	0.0139151	0.0529845	0	0	82.1523	351.183	OCRL
661	Activation Of AMPK Downstream Of NMDARs R-HSA-9619483	1/10	0.0139151	0.0547117	0	0	82.1523	351.183	MAPT
662	Gap Junction Degradation R-HSA-190873	1/10	0.0139151	0.0547117	0	0	82.1523	351.183	CLTC
663	Nef Mediated Downregulation Of MHC Class I Complex Cell Surface Expression R-HSA-164940	1/10	0.0139151	0.0547117	0	0	82.1523	351.183	AP1G1
75	Regulation Of Endocytic Recycling (GO:2001135)	1/11	0.0152963	0.0774258	0	0	73.9333	309.052	OCRL
76	Golgi To Lysosome Transport (GO:0090160)	1/11	0.0152963	0.0774258	0	0	73.9333	309.052	AP1G1
77	Negative Regulation Of Nitrogen Compound Metabolic Process (GO:0051172)	1/11	0.0152963	0.0774258	0	0	73.9333	309.052	CLTC
78	Isotype Switching (GO:0045190)	1/11	0.0152963	0.0774258	0	0	73.9333	309.052	HSPD1
79	Regulation Of Phospholipase C Activity (GO:1900274)	1/11	0.0152963	0.0774258	0	0	73.9333	309.052	ABL2
80	Cell Part Morphogenesis (GO:0032990)	1/11	0.0152963	0.0774258	0	0	73.9333	309.052	WASF1
81	Mitochondrion Distribution (GO:0048311)	1/11	0.0152963	0.0774258	0	0	73.9333	309.052	MAPT
429	AP-1 Adaptor Complex (GO:0030121)	1/11	0.0152963	0.0587701	0	0	73.9333	309.052	AP1G1
510	Phosphatidylinositol Phosphate 5-Phosphatase Activity (GO:0034595)	1/11	0.0152963	0.0540834	0	0	73.9333	309.052	OCRL
511	Dynactin Binding (GO:0034452)	1/11	0.0152963	0.0540834	0	0	73.9333	309.052	MAPT
664	Endosomal/Vacuolar Pathway R-HSA-1236977	1/11	0.0152963	0.0575275	0	0	73.9333	309.052	LNPEP
665	WNT5A-dependent Internalization Of FZD2, FZD5 And ROR2 R-HSA-5140745	1/11	0.0152963	0.0575275	0	0	73.9333	309.052	CLTC
592	Yersinia infection	2/137	0.0156717	0.0579853	0	0	11.3031	46.9747	WIPF2;WASF2
82	Regulation Of Apoptotic Process (GO:0042981)	4/705	0.0159954	0.0799771	0	0	4.58179	18.9478	PRDX3;ABL2;CCAR2;HSPD1
666	Neuronal System R-HSA-112316	3/386	0.0163462	0.0588753	0	0	6.13755	25.2484	HSPA8;MAPT;PDLIM5
83	MyD88-dependent Toll-Like Receptor Signaling Pathway (GO:0002755)	1/12	0.0166757	0.0804355	0	0	67.2088	275.14	HSPD1
84	Astrocyte Activation (GO:0048143)	1/12	0.0166757	0.0804355	0	0	67.2088	275.14	MAPT
85	Axonal Transport Of Mitochondrion (GO:0019896)	1/12	0.0166757	0.0804355	0	0	67.2088	275.14	MAPT
512	Phosphatidylinositol Monophosphate Phosphatase Activity (GO:0052744)	1/12	0.0166757	0.0569272	0	0	67.2088	275.14	OCRL
667	ALK Mutants Bind TKIs R-HSA-9700645	1/12	0.0166757	0.0588753	0	0	67.2088	275.14	CLTC
668	Caspase-mediated Cleavage Of Cytoskeletal Proteins R-HSA-264870	1/12	0.0166757	0.0588753	0	0	67.2088	275.14	MAPT
86	Ras Protein Signal Transduction (GO:0007265)	2/144	0.0172166	0.0813383	0	0	10.7421	43.6333	ARHGAP29;WASF1
87	Positive Regulation Of Superoxide Anion Generation (GO:0032930)	1/13	0.0180531	0.0813383	0	0	61.6049	247.309	MAPT
88	Regulation Of Oxidoreductase Activity (GO:0051341)	1/13	0.0180531	0.0813383	0	0	61.6049	247.309	ABL2
89	Clathrin Coat Assembly (GO:0048268)	1/13	0.0180531	0.0813383	0	0	61.6049	247.309	CLTC
90	Negative Regulation Of NLRP3 Inflammasome Complex Assembly (GO:1900226)	1/13	0.0180531	0.0813383	0	0	61.6049	247.309	HSPA8
91	Response To Nerve Growth Factor (GO:1990089)	1/13	0.0180531	0.0813383	0	0	61.6049	247.309	MAPT
430	Clathrin Coat Of trans-Golgi Network Vesicle (GO:0030130)	1/13	0.0180531	0.0599036	0	0	61.6049	247.309	AP1G1
431	Mitotic Spindle Microtubule (GO:1990498)	1/13	0.0180531	0.0599036	0	0	61.6049	247.309	CLTC
432	Glial Cell Projection (GO:0097386)	1/13	0.0180531	0.0599036	0	0	61.6049	247.309	MAPT
513	DNA Replication Origin Binding (GO:0003688)	1/13	0.0180531	0.0576535	0	0	61.6049	247.309	HSPD1
514	Phosphatidylinositol-3,5-Bisphosphate Phosphatase Activity (GO:0106018)	1/13	0.0180531	0.0576535	0	0	61.6049	247.309	OCRL
593	Spliceosome	2/150	0.0185904	0.0625315	0	0	10.3035	41.0607	TCERG1;HSPA8
92	Cellular Response To Oxygen-Containing Compound (GO:1901701)	3/406	0.0186784	0.0821215	0	0	5.827	23.1937	PRDX3;ABL2;MAPT
93	Regulation Of Cellular Component Organization (GO:0051128)	2/153	0.0192943	0.0821215	0	0	10.0973	39.8636	HSPA8;ABL2
94	Negative Regulation Of Transcription Elongation By RNA Polymerase II (GO:0034244)	1/14	0.0194287	0.0821215	0	0	56.8632	224.098	TCERG1
95	Regulation Of Sequestering Of Triglyceride (GO:0010889)	1/14	0.0194287	0.0821215	0	0	56.8632	224.098	OSBPL8
96	Regulation Of Superoxide Anion Generation (GO:0032928)	1/14	0.0194287	0.0821215	0	0	56.8632	224.098	MAPT
97	Mitochondrion Transport Along Microtubule (GO:0047497)	1/14	0.0194287	0.0821215	0	0	56.8632	224.098	MAPT
515	Muscle Alpha-Actinin Binding (GO:0051371)	1/14	0.0194287	0.0601077	0	0	56.8632	224.098	PDLIM5
669	Synthesis Of IP2, IP, And Ins In Cytosol R-HSA-1855183	1/14	0.0194287	0.0659053	0	0	56.8632	224.098	OCRL
670	Retrograde Neurotrophin Signaling R-HSA-177504	1/14	0.0194287	0.0659053	0	0	56.8632	224.098	CLTC
433	Recycling Endosome (GO:0055037)	2/159	0.0207355	0.0658128	0	0	9.70848	37.6291	AP1G1;OCRL
98	Regulation Of Cellular Response To Heat (GO:1900034)	1/15	0.0208025	0.0839411	0	0	52.7989	204.474	MAPT
99	Regulation Of Intrinsic Apoptotic Signaling Pathway In Response To DNA Damage (GO:1902229)	1/15	0.0208025	0.0839411	0	0	52.7989	204.474	CCAR2
100	Astrocyte Development (GO:0014002)	1/15	0.0208025	0.0839411	0	0	52.7989	204.474	MAPT
671	Negative Regulation Of FLT3 R-HSA-9706369	1/15	0.0208025	0.0679025	0	0	52.7989	204.474	ABL2
672	WNT5A-dependent Internalization Of FZD4 R-HSA-5099900	1/15	0.0208025	0.0679025	0	0	52.7989	204.474	CLTC
516	GTPase Regulator Activity (GO:0030695)	3/424	0.0209289	0.0627866	0	0	5.57273	21.5477	ARHGEF16;ARHGAP29;OCRL
101	Positive Regulation Of Lymphocyte Migration (GO:2000403)	1/16	0.0221744	0.0839411	0	0	49.2765	187.685	ABL2
102	Negative Regulation Of Receptor Signaling Pathway Via JAK-STAT (GO:0046426)	1/16	0.0221744	0.0839411	0	0	49.2765	187.685	OCRL
103	Phosphatidylinositol Dephosphorylation (GO:0046856)	1/16	0.0221744	0.0839411	0	0	49.2765	187.685	OCRL
434	Clathrin Coat (GO:0030118)	1/16	0.0221744	0.0674471	0	0	49.2765	187.685	CLTC
517	Ubiquitin-Protein Transferase Activator Activity (GO:0097027)	1/16	0.0221744	0.0645666	0	0	49.2765	187.685	ZNF598
673	VLDLR Internalisation And Degradation R-HSA-8866427	1/16	0.0221744	0.0710402	0	0	49.2765	187.685	CLTC
104	Membrane Organization (GO:0061024)	2/167	0.0227253	0.0839411	0	0	9.23403	34.9442	HSPA8;OCRL
435	Intracellular Non-Membrane-Bounded Organelle (GO:0043232)	5/1195	0.0235275	0.0687004	0	0	3.43113	12.8653	CLTC;MTUS1;WASF1;CKAP5;CCAR2
105	Golgi To Vacuole Transport (GO:0006896)	1/17	0.0235444	0.0839411	0	0	46.1944	173.177	AP1G1
106	Positive Regulation Of Macrophage Activation (GO:0043032)	1/17	0.0235444	0.0839411	0	0	46.1944	173.177	HSPD1
107	Rac Protein Signal Transduction (GO:0016601)	1/17	0.0235444	0.0839411	0	0	46.1944	173.177	WASF1
108	Regulation Of Leukocyte Chemotaxis (GO:0002688)	1/17	0.0235444	0.0839411	0	0	46.1944	173.177	MTUS1
109	Regulation Of Receptor Recycling (GO:0001919)	1/17	0.0235444	0.0839411	0	0	46.1944	173.177	OCRL
110	Microtubule Depolymerization (GO:0007019)	1/17	0.0235444	0.0839411	0	0	46.1944	173.177	CKAP5
111	Polyol Metabolic Process (GO:0019751)	1/17	0.0235444	0.0839411	0	0	46.1944	173.177	OCRL
112	Regulation Of Tubulin Deacetylation (GO:0090043)	1/17	0.0235444	0.0839411	0	0	46.1944	173.177	MAPT
113	Cellular Response To Unfolded Protein (GO:0034620)	1/17	0.0235444	0.0839411	0	0	46.1944	173.177	HSPD1
114	Central Nervous System Neuron Development (GO:0021954)	1/17	0.0235444	0.0839411	0	0	46.1944	173.177	MAPT
115	ncRNA Metabolic Process (GO:0034660)	1/17	0.0235444	0.0839411	0	0	46.1944	173.177	MAPT
518	Cadherin Binding Involved In Cell-Cell Adhesion (GO:0098641)	1/17	0.0235444	0.0647472	0	0	46.1944	173.177	PDLIM5
519	RNA Polymerase Binding (GO:0070063)	1/17	0.0235444	0.0647472	0	0	46.1944	173.177	TCERG1
674	Synthesis Of PIPs At Golgi Membrane R-HSA-1660514	1/17	0.0235444	0.0727355	0	0	46.1944	173.177	OCRL
675	Protein Methylation R-HSA-8876725	1/17	0.0235444	0.0727355	0	0	46.1944	173.177	HSPA8
116	Regulation Of Neuron Projection Development (GO:0010975)	2/174	0.0245288	0.0844147	0	0	8.8551	32.8339	ABL2;PDLIM5
117	Negative Regulation Of Lipid Storage (GO:0010888)	1/18	0.0249126	0.0844147	0	0	43.4749	160.526	OSBPL8
118	Regulation Of Protein Deacetylation (GO:0090311)	1/18	0.0249126	0.0844147	0	0	43.4749	160.526	CCAR2
119	Melanosome Assembly (GO:1903232)	1/18	0.0249126	0.0844147	0	0	43.4749	160.526	AP1G1
120	Regulation Of DNA Damage Checkpoint (GO:2000001)	1/18	0.0249126	0.0844147	0	0	43.4749	160.526	CCAR2
121	Negative Regulation Of DNA-templated Transcription, Elongation (GO:0032785)	1/18	0.0249126	0.0844147	0	0	43.4749	160.526	TCERG1
676	LDL Clearance R-HSA-8964038	1/18	0.0249126	0.0756121	0	0	43.4749	160.526	CLTC
520	Kinase Binding (GO:0019900)	3/460	0.0258628	0.0667082	0	0	5.12429	18.729	PRDX3;CLTC;MAPT
122	Positive Regulation Of Axon Extension (GO:0045773)	1/19	0.026279	0.0865178	0	0	41.0576	149.408	MAPT
436	Clathrin Adaptor Complex (GO:0030131)	1/19	0.026279	0.0710506	0	0	41.0576	149.408	AP1G1
437	Endolysosome Membrane (GO:0036020)	1/19	0.026279	0.0710506	0	0	41.0576	149.408	CLTC
521	Metalloaminopeptidase Activity (GO:0070006)	1/19	0.026279	0.0667082	0	0	41.0576	149.408	LNPEP
522	Cysteine-Type Endopeptidase Inhibitor Activity Involved In Apoptotic Process (GO:0043027)	1/19	0.026279	0.0667082	0	0	41.0576	149.408	PRDX3
677	GABA Synthesis, Release, Reuptake And Degradation R-HSA-888590	1/19	0.026279	0.0770553	0	0	41.0576	149.408	HSPA8
678	Nuclear Events Stimulated By ALK Signaling In Cancer R-HSA-9725371	1/19	0.026279	0.0770553	0	0	41.0576	149.408	CLTC
123	RNA Processing (GO:0006396)	2/183	0.0269314	0.0865178	0	0	8.41096	30.4011	TCERG1;CCAR2
124	Positive Regulation Of Leukocyte Activation (GO:0002696)	1/20	0.0276435	0.0865178	0	0	38.8947	139.569	HSPD1
125	Negative Regulation Of Protein Localization To Cell Periphery (GO:1904376)	1/20	0.0276435	0.0865178	0	0	38.8947	139.569	CLTC
126	Negative Regulation Of Protein Localization To Plasma Membrane (GO:1903077)	1/20	0.0276435	0.0865178	0	0	38.8947	139.569	CLTC
127	Hydrogen Peroxide Catabolic Process (GO:0042744)	1/20	0.0276435	0.0865178	0	0	38.8947	139.569	PRDX3
128	Regulation Of Macrophage Chemotaxis (GO:0010758)	1/20	0.0276435	0.0865178	0	0	38.8947	139.569	MTUS1
129	Regulation Of Spindle Organization (GO:0090224)	1/20	0.0276435	0.0865178	0	0	38.8947	139.569	CLTC
130	Microglial Cell Activation (GO:0001774)	1/20	0.0276435	0.0865178	0	0	38.8947	139.569	MAPT
131	Phosphatidylserine Metabolic Process (GO:0006658)	1/20	0.0276435	0.0865178	0	0	38.8947	139.569	OSBPL8
523	Actinin Binding (GO:0042805)	1/20	0.0276435	0.0667489	0	0	38.8947	139.569	PDLIM5
524	Ubiquitin-Specific Protease Binding (GO:1990381)	1/20	0.0276435	0.0667489	0	0	38.8947	139.569	CLTC
679	Nef-mediated Downmodulation Of Cell Surface Receptors By Recruitment To Clathrin Adapters R-HSA-164938	1/20	0.0276435	0.0783987	0	0	38.8947	139.569	AP1G1
680	Chaperone Mediated Autophagy R-HSA-9613829	1/20	0.0276435	0.0783987	0	0	38.8947	139.569	HSPA8
132	Endocytosis (GO:0006897)	2/189	0.0285843	0.0880927	0	0	8.13863	28.932	CLTC;WASF1
133	Positive Regulation Of Interferon-Alpha Production (GO:0032727)	1/21	0.0290061	0.0880927	0	0	36.9481	130.806	HSPD1
134	Peptide Catabolic Process (GO:0043171)	1/21	0.0290061	0.0880927	0	0	36.9481	130.806	LNPEP
135	Chaperone-Mediated Protein Complex Assembly (GO:0051131)	1/21	0.0290061	0.0880927	0	0	36.9481	130.806	HSPD1
438	Intracellular Organelle Lumen (GO:0070013)	4/856	0.0301295	0.076935	0	0	3.74022	13.0992	PRDX3;HSPA8;CCAR2;HSPD1
681	Disease R-HSA-1643685	6/1736	0.0303336	0.0833886	0	0	2.87578	10.0523	ABI2;AP1G1;WIPF2;CLTC;WASF1;WASF2
136	Inositol Phosphate Metabolic Process (GO:0043647)	1/22	0.030367	0.0899346	0	0	35.1869	122.957	OCRL
137	Platelet Dense Granule Organization (GO:0060155)	1/22	0.030367	0.0899346	0	0	35.1869	122.957	AP1G1
525	Low-Density Lipoprotein Particle Receptor Binding (GO:0050750)	1/22	0.030367	0.0682797	0	0	35.1869	122.957	CLTC
682	Acyl Chain Remodelling Of PS R-HSA-1482801	1/22	0.030367	0.0833886	0	0	35.1869	122.957	OSBPL8
439	Endocytic Vesicle (GO:0030139)	2/196	0.0305632	0.076935	0	0	7.84219	27.3532	CLTC;OCRL
138	Positive Regulation Of Lamellipodium Assembly (GO:0010592)	1/23	0.0317259	0.0899346	0	0	33.5859	115.892	WASF2
139	Positive Regulation Of Oxidoreductase Activity (GO:0051353)	1/23	0.0317259	0.0899346	0	0	33.5859	115.892	ABL2
140	Protein Alkylation (GO:0008213)	1/23	0.0317259	0.0899346	0	0	33.5859	115.892	PCMT1
141	Rescue Of Stalled Ribosome (GO:0072344)	1/23	0.0317259	0.0899346	0	0	33.5859	115.892	ZNF598
142	Regulation Of T Cell Migration (GO:2000404)	1/23	0.0317259	0.0899346	0	0	33.5859	115.892	ABL2
143	Regulation Of Cell Junction Assembly (GO:1901888)	1/23	0.0317259	0.0899346	0	0	33.5859	115.892	PDLIM5
526	Actin Monomer Binding (GO:0003785)	1/23	0.0317259	0.0682797	0	0	33.5859	115.892	ABL2
527	Alpha-Actinin Binding (GO:0051393)	1/23	0.0317259	0.0682797	0	0	33.5859	115.892	PDLIM5
528	Protein Phosphatase 2A Binding (GO:0051721)	1/23	0.0317259	0.0682797	0	0	33.5859	115.892	MAPT
529	Disordered Domain Specific Binding (GO:0097718)	1/23	0.0317259	0.0682797	0	0	33.5859	115.892	CLTC
594	Renin-angiotensin system	1/23	0.0317259	0.0978216	0	0	33.5859	115.892	LNPEP
144	Stress Granule Assembly (GO:0034063)	1/24	0.0330831	0.0899346	0	0	32.124	109.502	MAPT
145	Amyloid Fibril Formation (GO:1990000)	1/24	0.0330831	0.0899346	0	0	32.124	109.502	MAPT
146	Iron Ion Transport (GO:0006826)	1/24	0.0330831	0.0899346	0	0	32.124	109.502	CLTC
683	Phospholipid Metabolism R-HSA-1483257	2/208	0.0340793	0.0910587	0	0	7.38088	24.9405	OSBPL8;OCRL
147	Positive Regulation Of Glucose Import (GO:0046326)	1/25	0.0344384	0.0899346	0	0	30.784	103.698	OSBPL8
148	Negative Regulation Of Intrinsic Apoptotic Signaling Pathway In Response To DNA Damage (GO:1902230)	1/25	0.0344384	0.0899346	0	0	30.784	103.698	CCAR2
149	Negative Regulation Of Protein Localization To Membrane (GO:1905476)	1/25	0.0344384	0.0899346	0	0	30.784	103.698	CLTC
150	Activation Of Protein Kinase B Activity (GO:0032148)	1/25	0.0344384	0.0899346	0	0	30.784	103.698	OSBPL8
151	Negative Regulation Of Response To Wounding (GO:1903035)	1/25	0.0344384	0.0899346	0	0	30.784	103.698	OCRL
152	Negative Regulation Of Stress Fiber Assembly (GO:0051497)	1/25	0.0344384	0.0899346	0	0	30.784	103.698	WASF2
153	Organophosphate Ester Transport (GO:0015748)	1/25	0.0344384	0.0899346	0	0	30.784	103.698	OSBPL8
154	Cellular Response To Steroid Hormone Stimulus (GO:0071383)	1/25	0.0344384	0.0899346	0	0	30.784	103.698	HSPA8
155	Positive Regulation Of T Cell Migration (GO:2000406)	1/25	0.0344384	0.0899346	0	0	30.784	103.698	ABL2
156	Regulation Of Actin Cytoskeleton Reorganization (GO:2000249)	1/25	0.0344384	0.0899346	0	0	30.784	103.698	ABL2
157	Secretory Granule Organization (GO:0033363)	1/25	0.0344384	0.0899346	0	0	30.784	103.698	AP1G1
440	Endosome Lumen (GO:0031904)	1/25	0.0344384	0.0816661	0	0	30.784	103.698	LNPEP
530	Phosphatidylinositol-4-Phosphate Binding (GO:0070273)	1/25	0.0344384	0.0706782	0	0	30.784	103.698	OSBPL8
531	MHC Class II Protein Complex Binding (GO:0023026)	1/25	0.0344384	0.0706782	0	0	30.784	103.698	HSPA8
684	Gap Junction Trafficking R-HSA-190828	1/25	0.0344384	0.0910587	0	0	30.784	103.698	CLTC
441	Spindle (GO:0005819)	2/210	0.0346801	0.0816661	0	0	7.30917	24.5704	CLTC;CCAR2
532	GTPase Activator Activity (GO:0005096)	2/211	0.0349821	0.0706782	0	0	7.27383	24.3886	ARHGAP29;OCRL
685	Axon Guidance R-HSA-422475	3/519	0.0351982	0.0910587	0	0	4.52465	15.1429	HSPA8;CLTC;ABL2
158	Positive Regulation Of Microtubule Polymerization Or Depolymerization (GO:0031112)	1/26	0.0357919	0.0902863	0	0	29.5511	98.4062	MAPT
159	Regulation Of Interferon-Alpha Production (GO:0032647)	1/26	0.0357919	0.0902863	0	0	29.5511	98.4062	HSPD1
160	Cardiac Muscle Cell Development (GO:0055013)	1/26	0.0357919	0.0902863	0	0	29.5511	98.4062	PDLIM5
161	Protein Targeting To Lysosome (GO:0006622)	1/26	0.0357919	0.0902863	0	0	29.5511	98.4062	HSPA8
162	Negative Regulation Of Catalytic Activity (GO:0043086)	1/26	0.0357919	0.0902863	0	0	29.5511	98.4062	CCAR2
686	Synthesis Of IP3 And IP4 In Cytosol R-HSA-1855204	1/26	0.0357919	0.0910587	0	0	29.5511	98.4062	OCRL
687	Attenuation Phase R-HSA-3371568	1/26	0.0357919	0.0910587	0	0	29.5511	98.4062	HSPA8
163	mRNA Processing (GO:0006397)	2/214	0.0358943	0.0902863	0	0	7.16981	23.8552	TCERG1;HSPA8
595	Lipid and atherosclerosis	2/215	0.0362005	0.103032	0	0	7.13579	23.6814	HSPA8;HSPD1
164	Glycerophospholipid Catabolic Process (GO:0046475)	1/27	0.0371435	0.0911906	0	0	28.4131	93.5634	OCRL
165	Regulation Of Microtubule Polymerization Or Depolymerization (GO:0031110)	1/27	0.0371435	0.0911906	0	0	28.4131	93.5634	MAPT
166	Regulation Of Mitochondrial Fission (GO:0090140)	1/27	0.0371435	0.0911906	0	0	28.4131	93.5634	MAPT
167	Chaperone Cofactor-Dependent Protein Refolding (GO:0051085)	1/27	0.0371435	0.0911906	0	0	28.4131	93.5634	HSPA8
533	Lipoprotein Particle Receptor Binding (GO:0070325)	1/27	0.0371435	0.0735441	0	0	28.4131	93.5634	CLTC
688	Gap Junction Trafficking And Regulation R-HSA-157858	1/27	0.0371435	0.0917975	0	0	28.4131	93.5634	CLTC
689	Role Of Nef In HIV-1 Replication And Disease Pathogenesis R-HSA-164952	1/27	0.0371435	0.0917975	0	0	28.4131	93.5634	AP1G1
168	Protein Depolymerization (GO:0051261)	1/28	0.0384933	0.0917792	0	0	27.3594	89.117	CKAP5
169	Regulation Of Protein Transport (GO:0051223)	1/28	0.0384933	0.0917792	0	0	27.3594	89.117	HSPA8
170	Negative Regulation Of Actin Filament Bundle Assembly (GO:0032232)	1/28	0.0384933	0.0917792	0	0	27.3594	89.117	WASF2
442	Endolysosome (GO:0036019)	1/28	0.0384933	0.0855785	0	0	27.3594	89.117	CLTC
690	Recycling Pathway Of L1 R-HSA-437239	1/28	0.0384933	0.0937936	0	0	27.3594	89.117	CLTC
443	Lytic Vacuole (GO:0000323)	2/223	0.0386862	0.0855785	0	0	6.8747	22.3584	HSPA8;CLTC
171	Protein Polyubiquitination (GO:0000209)	2/226	0.0396349	0.0917792	0	0	6.78159	21.8913	LNPEP;ZNF598
691	Nervous System Development R-HSA-9675108	3/545	0.0398012	0.0956334	0	0	4.30185	13.8685	HSPA8;CLTC;ABL2
172	Protein Acetylation (GO:0006473)	1/29	0.0398413	0.0917792	0	0	26.381	85.0219	MAPT
173	Response To Steroid Hormone (GO:0048545)	1/29	0.0398413	0.0917792	0	0	26.381	85.0219	HSPA8
534	Aminopeptidase Activity (GO:0004177)	1/29	0.0398413	0.077339	0	0	26.381	85.0219	LNPEP
174	Cellular Response To Lipid (GO:0071396)	2/228	0.0402724	0.0917792	0	0	6.7209	21.5881	HSPA8;ABL2
175	Positive Regulation Of Interleukin-10 Production (GO:0032733)	1/30	0.0411875	0.0917792	0	0	25.47	81.2396	HSPD1
176	Regulation Of Dendritic Spine Morphogenesis (GO:0061001)	1/30	0.0411875	0.0917792	0	0	25.47	81.2396	PDLIM5
177	Positive Regulation Of Lipid Kinase Activity (GO:0090218)	1/30	0.0411875	0.0917792	0	0	25.47	81.2396	MAPT
178	Negative Regulation Of Peptidyl-Tyrosine Phosphorylation (GO:0050732)	1/30	0.0411875	0.0917792	0	0	25.47	81.2396	OCRL
179	Lamellipodium Organization (GO:0097581)	1/30	0.0411875	0.0917792	0	0	25.47	81.2396	WASF1
180	Phospholipid Dephosphorylation (GO:0046839)	1/30	0.0411875	0.0917792	0	0	25.47	81.2396	OCRL
181	Negative Regulation Of Carbohydrate Metabolic Process (GO:0045912)	1/30	0.0411875	0.0917792	0	0	25.47	81.2396	CLTC
182	Regulation Of Calcium-Mediated Signaling (GO:0050848)	1/30	0.0411875	0.0917792	0	0	25.47	81.2396	MAPT
183	Positive Regulation Of GTPase Activity (GO:0043547)	2/234	0.0422083	0.0917792	0	0	6.54509	20.7161	ARHGEF16;ARHGAP29
184	Positive Regulation Of Glucose Transmembrane Transport (GO:0010828)	1/31	0.0425318	0.0917792	0	0	24.6198	77.7369	OSBPL8
185	B Cell Proliferation (GO:0042100)	1/31	0.0425318	0.0917792	0	0	24.6198	77.7369	HSPD1
186	Positive Regulation Of Lamellipodium Organization (GO:1902745)	1/31	0.0425318	0.0917792	0	0	24.6198	77.7369	WASF2
187	Toll-Like Receptor Signaling Pathway (GO:0002224)	1/31	0.0425318	0.0917792	0	0	24.6198	77.7369	HSPD1
188	Actin Filament Polymerization (GO:0030041)	1/31	0.0425318	0.0917792	0	0	24.6198	77.7369	WASF1
189	Regulation Of Macrophage Activation (GO:0043030)	1/31	0.0425318	0.0917792	0	0	24.6198	77.7369	HSPD1
190	Central Nervous System Neuron Differentiation (GO:0021953)	1/31	0.0425318	0.0917792	0	0	24.6198	77.7369	MAPT
444	Golgi Stack (GO:0005795)	1/31	0.0425318	0.0887144	0	0	24.6198	77.7369	OCRL
535	Kinesin Binding (GO:0019894)	1/31	0.0425318	0.0794463	0	0	24.6198	77.7369	AP1G1
536	RNA Polymerase II Complex Binding (GO:0000993)	1/31	0.0425318	0.0794463	0	0	24.6198	77.7369	CCAR2
692	Late Endosomal Microautophagy R-HSA-9615710	1/31	0.0425318	0.100795	0	0	24.6198	77.7369	HSPA8
445	Vesicle (GO:0031982)	2/235	0.0425343	0.0887144	0	0	6.51667	20.576	PCMT1;CLTC
191	'De Novo' Post-Translational Protein Folding (GO:0051084)	1/32	0.0438744	0.0926909	0	0	23.8244	74.4851	HSPA8
192	Negative Regulation Of Proteasomal Ubiquitin-Dependent Protein Catabolic Process (GO:0032435)	1/32	0.0438744	0.0926909	0	0	23.8244	74.4851	CCAR2
193	Protein Transmembrane Import Into Intracellular Organelle (GO:0044743)	1/32	0.0438744	0.0926909	0	0	23.8244	74.4851	HSPD1
194	Purine Ribonucleoside Triphosphate Metabolic Process (GO:0009205)	1/32	0.0438744	0.0926909	0	0	23.8244	74.4851	HSPA8
195	Regulation Of Autophagy (GO:0010506)	2/241	0.0445107	0.0926909	0	0	6.35114	19.7649	ABL2;MAPT
196	Positive Regulation Of Interleukin-12 Production (GO:0032735)	1/33	0.0452151	0.0926909	0	0	23.0787	71.4592	HSPD1
197	Regulation Of Lamellipodium Assembly (GO:0010591)	1/33	0.0452151	0.0926909	0	0	23.0787	71.4592	WASF2
198	Inositol Lipid-Mediated Signaling (GO:0048017)	1/33	0.0452151	0.0926909	0	0	23.0787	71.4592	OCRL
199	Regulation Of Protein Polymerization (GO:0032271)	1/33	0.0452151	0.0926909	0	0	23.0787	71.4592	MAPT
200	Regulation Of NLRP3 Inflammasome Complex Assembly (GO:1900225)	1/33	0.0452151	0.0926909	0	0	23.0787	71.4592	HSPA8
537	DNA Secondary Structure Binding (GO:0000217)	1/33	0.0452151	0.0812235	0	0	23.0787	71.4592	MAPT
538	RNA Polymerase Core Enzyme Binding (GO:0043175)	1/33	0.0452151	0.0812235	0	0	23.0787	71.4592	CCAR2
201	Positive Regulation Of Programmed Cell Death (GO:0043068)	2/245	0.0458472	0.0935192	0	0	6.24533	19.2509	CCAR2;HSPD1
596	Shigellosis	2/246	0.0461837	0.122057	0	0	6.21942	19.1255	WASF1;WASF2
693	Transmission Across Chemical Synapses R-HSA-112315	2/246	0.0461837	0.107385	0	0	6.21942	19.1255	HSPA8;MAPT
202	ATP Metabolic Process (GO:0046034)	1/34	0.046554	0.0935644	0	0	22.3782	68.6372	HSPA8
203	Positive Regulation Of Neuron Death (GO:1901216)	1/34	0.046554	0.0935644	0	0	22.3782	68.6372	MAPT
204	Embryonic Skeletal System Development (GO:0048706)	1/34	0.046554	0.0935644	0	0	22.3782	68.6372	KIAA1217
539	Ubiquitin-Like Protein Conjugating Enzyme Binding (GO:0044390)	1/34	0.046554	0.0812235	0	0	22.3782	68.6372	TCERG1
694	Detoxification Of Reactive Oxygen Species R-HSA-3299685	1/34	0.046554	0.107385	0	0	22.3782	68.6372	PRDX3
205	Macrophage Activation (GO:0042116)	1/35	0.0478911	0.0948567	0	0	21.719	66.0001	MAPT
206	Protein Methylation (GO:0006479)	1/35	0.0478911	0.0948567	0	0	21.719	66.0001	PCMT1
207	Regulation Of Axon Extension (GO:0030516)	1/35	0.0478911	0.0948567	0	0	21.719	66.0001	MAPT
540	Hsp90 Protein Binding (GO:0051879)	1/35	0.0478911	0.0812235	0	0	21.719	66.0001	MAPT
208	Regulation Of Glucose Import (GO:0046324)	1/36	0.0492264	0.0970327	0	0	21.0974	63.531	OSBPL8
541	Basal RNA Polymerase II Transcription Machinery Binding (GO:0001099)	1/36	0.0492264	0.0812235	0	0	21.0974	63.531	CCAR2
542	Protein Kinase C Binding (GO:0005080)	1/36	0.0492264	0.0812235	0	0	21.0974	63.531	PDLIM5
543	Non-Membrane Spanning Protein Tyrosine Kinase Activity (GO:0004715)	1/36	0.0492264	0.0812235	0	0	21.0974	63.531	ABL2
695	Transcriptional Regulation By AP-2 (TFAP2) Family Of Transcription Factors R-HSA-8864260	1/36	0.0492264	0.1106	0	0	21.0974	63.531	HSPD1
696	HSF1-dependent Transactivation R-HSA-3371571	1/36	0.0492264	0.1106	0	0	21.0974	63.531	HSPA8
209	Positive Regulation Of Signaling (GO:0023056)	1/37	0.0505598	0.0982443	0	0	20.5103	61.215	OCRL
210	Melanosome Organization (GO:0032438)	1/37	0.0505598	0.0982443	0	0	20.5103	61.215	AP1G1
211	Regulation Of Cellular Component Biogenesis (GO:0044087)	1/37	0.0505598	0.0982443	0	0	20.5103	61.215	HSPA8
697	FLT3 Signaling R-HSA-9607240	1/37	0.0505598	0.11072	0	0	20.5103	61.215	ABL2
698	RHOV GTPase Cycle R-HSA-9013424	1/37	0.0505598	0.11072	0	0	20.5103	61.215	CLTC
212	Regulation Of Intracellular Transport (GO:0032386)	1/38	0.0518915	0.0987365	0	0	19.955	59.0387	OCRL
213	Lymphocyte Proliferation (GO:0046651)	1/38	0.0518915	0.0987365	0	0	19.955	59.0387	HSPD1
214	Positive Regulation Of Axonogenesis (GO:0050772)	1/38	0.0518915	0.0987365	0	0	19.955	59.0387	MAPT
699	Apoptotic Cleavage Of Cellular Proteins R-HSA-111465	1/38	0.0518915	0.11083	0	0	19.955	59.0387	MAPT
700	HSP90 Chaperone Cycle For Steroid Hormone Receptors (SHR) In Presence Of Ligand R-HSA-3371497	1/38	0.0518915	0.11083	0	0	19.955	59.0387	HSPA8
215	Negative Regulation Of Mitochondrion Organization (GO:0010823)	1/39	0.0532214	0.0987365	0	0	19.4288	56.9905	MAPT
216	RNA Transport (GO:0050658)	1/39	0.0532214	0.0987365	0	0	19.4288	56.9905	CKAP5
217	Negative Regulation Of Proteasomal Protein Catabolic Process (GO:1901799)	1/39	0.0532214	0.0987365	0	0	19.4288	56.9905	CCAR2
218	Negative Regulation Of Ubiquitin-Dependent Protein Catabolic Process (GO:2000059)	1/39	0.0532214	0.0987365	0	0	19.4288	56.9905	CCAR2
219	Regulation Of Mitotic Spindle Organization (GO:0060236)	1/39	0.0532214	0.0987365	0	0	19.4288	56.9905	CLTC
220	Axonal Transport (GO:0098930)	1/39	0.0532214	0.0987365	0	0	19.4288	56.9905	MAPT
221	Organelle Transport Along Microtubule (GO:0072384)	1/39	0.0532214	0.0987365	0	0	19.4288	56.9905	MAPT
544	Phosphotyrosine Residue Binding (GO:0001784)	1/39	0.0532214	0.0863757	0	0	19.4288	56.9905	ABL2
701	RHOU GTPase Cycle R-HSA-9013420	1/39	0.0532214	0.112284	0	0	19.4288	56.9905	CLTC
222	Positive Regulation Of Apoptotic Process (GO:0043065)	2/270	0.0545305	0.0989614	0	0	5.65557	16.452	CCAR2;HSPD1
446	Dendrite (GO:0030425)	2/270	0.0545305	0.110576	0	0	5.65557	16.452	HSPA8;MAPT
223	Regulation Of Microtubule Cytoskeleton Organization (GO:0070507)	1/40	0.0545495	0.0989614	0	0	18.9297	55.0599	MAPT
224	Regulation Of Microtubule Polymerization (GO:0031113)	1/40	0.0545495	0.0989614	0	0	18.9297	55.0599	MAPT
225	Cellular Response To Heat (GO:0034605)	1/40	0.0545495	0.0989614	0	0	18.9297	55.0599	MAPT
226	Positive Regulation Of Catalytic Activity (GO:0043085)	1/40	0.0545495	0.0989614	0	0	18.9297	55.0599	ABL2
227	Regulation Of Microtubule-Based Process (GO:0032886)	1/41	0.0558758	0.100921	0	0	18.4556	53.2374	MAPT
228	Translational Elongation (GO:0006414)	1/42	0.0572002	0.10286	0	0	18.0045	51.5145	ZNF598
229	Regulation Of Chromosome Organization (GO:0033044)	1/43	0.0585229	0.103872	0	0	17.575	49.8836	MAPT
230	Positive Regulation Of Transcription Elongation By RNA Polymerase II (GO:0032968)	1/43	0.0585229	0.103872	0	0	17.575	49.8836	TCERG1
231	Positive Regulation Of T Cell Mediated Immunity (GO:0002711)	1/43	0.0585229	0.103872	0	0	17.575	49.8836	HSPD1
545	Cell-Cell Adhesion Mediator Activity (GO:0098632)	1/43	0.0585229	0.0934479	0	0	17.575	49.8836	PDLIM5
597	Type I diabetes mellitus	1/43	0.0585229	0.144357	0	0	17.575	49.8836	HSPD1
232	Establishment Of Protein Localization To Mitochondrion (GO:0072655)	1/44	0.0598438	0.104855	0	0	17.1654	48.338	HSPD1
233	Positive Regulation Of Leukocyte Cell-Cell Adhesion (GO:1903039)	1/44	0.0598438	0.104855	0	0	17.1654	48.338	HSPD1
234	Regulation Of DNA-templated Transcription Elongation (GO:0032784)	1/44	0.0598438	0.104855	0	0	17.1654	48.338	CCAR2
235	Regulation Of Protein Modification Process (GO:0031399)	1/45	0.061163	0.10671	0	0	16.7744	46.8713	CCAR2
546	Protein Phosphorylated Amino Acid Binding (GO:0045309)	1/45	0.061163	0.0961132	0	0	16.7744	46.8713	ABL2
236	Vacuolar Transport (GO:0007034)	1/46	0.0624803	0.106737	0	0	16.4008	45.4779	AP1G1
237	Regulation Of Interleukin-10 Production (GO:0032653)	1/46	0.0624803	0.106737	0	0	16.4008	45.4779	HSPD1
238	Intracellular Protein Transmembrane Transport (GO:0065002)	1/46	0.0624803	0.106737	0	0	16.4008	45.4779	HSPD1
239	Response To Hydrogen Peroxide (GO:0042542)	1/46	0.0624803	0.106737	0	0	16.4008	45.4779	PRDX3
240	Negative Regulation Of Cold-Induced Thermogenesis (GO:0120163)	1/46	0.0624803	0.106737	0	0	16.4008	45.4779	LNPEP
598	MAPK signaling pathway	2/294	0.0633713	0.146546	0	0	5.1844	14.3024	HSPA8;MAPT
241	Positive Regulation Of Lymphocyte Activation (GO:0051251)	1/47	0.0637958	0.108084	0	0	16.0435	44.1527	HSPD1
242	Protein Monoubiquitination (GO:0006513)	1/47	0.0637958	0.108084	0	0	16.0435	44.1527	ZNF598
447	Golgi-associated Vesicle (GO:0005798)	1/47	0.0637958	0.125867	0	0	16.0435	44.1527	OCRL
243	Regulation Of Intracellular Signal Transduction (GO:1902531)	2/297	0.0645091	0.108843	0	0	5.1309	14.0635	ARHGAP29;MAPT
244	Positive Regulation Of Reactive Oxygen Species Metabolic Process (GO:2000379)	1/48	0.0651096	0.108959	0	0	15.7013	42.8911	MAPT
245	Cytoplasmic Microtubule Organization (GO:0031122)	1/48	0.0651096	0.108959	0	0	15.7013	42.8911	MAPT
547	Manganese Ion Binding (GO:0030145)	1/48	0.0651096	0.100716	0	0	15.7013	42.8911	ABL2
702	Inositol Phosphate Metabolism R-HSA-1483249	1/48	0.0651096	0.13571	0	0	15.7013	42.8911	OCRL
246	Neurogenesis (GO:0022008)	1/49	0.0664216	0.110199	0	0	15.3735	41.6887	MAPT
703	EPH-ephrin Mediated Repulsion Of Cells R-HSA-3928665	1/49	0.0664216	0.136797	0	0	15.3735	41.6887	CLTC
247	Regulation Of Interleukin-12 Production (GO:0032655)	1/50	0.0677318	0.110199	0	0	15.059	40.5417	HSPD1
248	Regulation Of Mitochondrion Organization (GO:0010821)	1/50	0.0677318	0.110199	0	0	15.059	40.5417	MAPT
249	Cell Chemotaxis (GO:0060326)	1/50	0.0677318	0.110199	0	0	15.059	40.5417	ARHGEF16
250	Plasma Membrane Bounded Cell Projection Morphogenesis (GO:0120039)	1/50	0.0677318	0.110199	0	0	15.059	40.5417	WASF1
251	Positive Regulation Of Cell Death (GO:0010942)	1/50	0.0677318	0.110199	0	0	15.059	40.5417	MAPT
252	Positive Regulation Of Developmental Growth (GO:0048639)	1/50	0.0677318	0.110199	0	0	15.059	40.5417	MAPT
548	Cholesterol Binding (GO:0015485)	1/50	0.0677318	0.101598	0	0	15.059	40.5417	OSBPL8
549	S-adenosylmethionine-dependent Methyltransferase Activity (GO:0008757)	1/50	0.0677318	0.101598	0	0	15.059	40.5417	PCMT1
704	Neurotransmitter Release Cycle R-HSA-112310	1/50	0.0677318	0.137287	0	0	15.059	40.5417	HSPA8
253	Positive Regulation Of Protein Localization To Cell Periphery (GO:1904377)	1/51	0.0690403	0.110572	0	0	14.757	39.4465	ARHGEF16
254	Positive Regulation Of Protein Localization To Plasma Membrane (GO:1903078)	1/51	0.0690403	0.110572	0	0	14.757	39.4465	ARHGEF16
255	Regulation Of Synapse Assembly (GO:0051963)	1/51	0.0690403	0.110572	0	0	14.757	39.4465	PDLIM5
256	Receptor Internalization (GO:0031623)	1/51	0.0690403	0.110572	0	0	14.757	39.4465	CLTC
705	Synthesis Of PIPs At Plasma Membrane R-HSA-1660499	1/51	0.0690403	0.137287	0	0	14.757	39.4465	OCRL
706	Translocation Of SLC2A4 (GLUT4) To Plasma Membrane R-HSA-1445148	1/51	0.0690403	0.137287	0	0	14.757	39.4465	LNPEP
257	Rho Protein Signal Transduction (GO:0007266)	1/52	0.0703469	0.112227	0	0	14.467	38.3999	ARHGAP29
550	Exopeptidase Activity (GO:0008238)	1/52	0.0703469	0.103945	0	0	14.467	38.3999	LNPEP
707	Apoptotic Execution Phase R-HSA-75153	1/52	0.0703469	0.138296	0	0	14.467	38.3999	MAPT
258	Negative Regulation Of Metabolic Process (GO:0009892)	1/53	0.0716518	0.11378	0	0	14.188	37.3988	LNPEP
599	Endocrine and other factor-regulated calcium reabsorption	1/53	0.0716518	0.155948	0	0	14.188	37.3988	CLTC
259	Supramolecular Fiber Organization (GO:0097435)	2/316	0.0718756	0.11378	0	0	4.81578	12.6791	MAPT;CKAP5
260	Protein K63-linked Ubiquitination (GO:0070534)	1/54	0.072955	0.114604	0	0	13.9196	36.4404	ZNF598
261	Peptidyl-Tyrosine Modification (GO:0018212)	1/54	0.072955	0.114604	0	0	13.9196	36.4404	ABL2
708	AUF1 (hnRNP D0) Binds And Destabilizes mRNA R-HSA-450408	1/54	0.072955	0.141811	0	0	13.9196	36.4404	HSPA8
709	Signaling By ALK Fusions And Activated Point Mutants R-HSA-9725370	1/55	0.0742564	0.142737	0	0	13.6612	35.5222	CLTC
262	Organelle Assembly (GO:0070925)	2/322	0.0742575	0.116204	0	0	4.72404	12.2835	AP1G1;OCRL
263	Peptide Metabolic Process (GO:0006518)	1/56	0.075556	0.117341	0	0	13.4121	34.6419	LNPEP
264	Positive Regulation Of DNA-templated Transcription, Elongation (GO:0032786)	1/56	0.075556	0.117341	0	0	13.4121	34.6419	TCERG1
265	Myeloid Cell Differentiation (GO:0030099)	1/57	0.0768538	0.118906	0	0	13.172	33.7973	PRDX3
551	Metalloexopeptidase Activity (GO:0008235)	1/57	0.0768538	0.11189	0	0	13.172	33.7973	LNPEP
710	NRAGE Signals Death Thru JNK R-HSA-193648	1/57	0.0768538	0.144519	0	0	13.172	33.7973	ARHGEF16
711	Neurexins And Neuroligins R-HSA-6794361	1/57	0.0768538	0.144519	0	0	13.172	33.7973	PDLIM5
266	Regulation Of Neuron Death (GO:1901214)	1/58	0.0781499	0.119312	0	0	12.9402	32.9863	MAPT
267	Positive Regulation Of Type II Interferon Production (GO:0032729)	1/58	0.0781499	0.119312	0	0	12.9402	32.9863	HSPD1
268	Memory (GO:0007613)	1/58	0.0781499	0.119312	0	0	12.9402	32.9863	MAPT
712	Cellular Responses To Stress R-HSA-2262752	3/722	0.0787338	0.146462	0	0	3.2133	8.16718	PRDX3;HSPA8;CCAR2
269	Negative Regulation Of Protein-Containing Complex Assembly (GO:0031333)	1/59	0.0794443	0.119312	0	0	12.7165	32.207	HSPA8
270	Microtubule Cytoskeleton Organization Involved In Mitosis (GO:1902850)	1/59	0.0794443	0.119312	0	0	12.7165	32.207	CKAP5
271	Protein Targeting To Mitochondrion (GO:0006626)	1/59	0.0794443	0.119312	0	0	12.7165	32.207	HSPD1
272	Phospholipid Transport (GO:0015914)	1/59	0.0794443	0.119312	0	0	12.7165	32.207	OSBPL8
273	Chordate Embryonic Development (GO:0043009)	1/59	0.0794443	0.119312	0	0	12.7165	32.207	KIAA1217
552	Sterol Binding (GO:0032934)	1/59	0.0794443	0.112357	0	0	12.7165	32.207	OSBPL8
553	Receptor Tyrosine Kinase Binding (GO:0030971)	1/59	0.0794443	0.112357	0	0	12.7165	32.207	ARHGEF16
274	Response To Light Stimulus (GO:0009416)	1/60	0.0807369	0.120811	0	0	12.5003	31.4578	CCAR2
600	Viral myocarditis	1/60	0.0807369	0.165959	0	0	12.5003	31.4578	ABL2
713	Adaptive Immune System R-HSA-1280218	3/733	0.0815659	0.146865	0	0	3.16307	7.92774	AP1G1;CLTC;LNPEP
275	Negative Regulation Of Intrinsic Apoptotic Signaling Pathway (GO:2001243)	1/61	0.0820277	0.122	0	0	12.2914	30.737	CCAR2
714	Post NMDA Receptor Activation Events R-HSA-438064	1/61	0.0820277	0.146865	0	0	12.2914	30.737	MAPT
715	Selective Autophagy R-HSA-9663891	1/61	0.0820277	0.146865	0	0	12.2914	30.737	HSPA8
716	Cellular Responses To Stimuli R-HSA-8953897	3/736	0.0823461	0.146865	0	0	3.14963	7.86408	PRDX3;HSPA8;CCAR2
276	Fat Cell Differentiation (GO:0045444)	1/62	0.0833168	0.122	0	0	12.0893	30.0431	OSBPL8
277	Cell Junction Organization (GO:0034330)	1/62	0.0833168	0.122	0	0	12.0893	30.0431	MAPT
278	Phosphatidylinositol-Mediated Signaling (GO:0048015)	1/62	0.0833168	0.122	0	0	12.0893	30.0431	OCRL
279	Protein-Containing Complex Disassembly (GO:0032984)	1/62	0.0833168	0.122	0	0	12.0893	30.0431	HSPA8
280	Regulation Of T Cell Activation (GO:0050863)	1/62	0.0833168	0.122	0	0	12.0893	30.0431	HSPD1
281	Phosphatidylinositol Metabolic Process (GO:0046488)	1/63	0.0846041	0.123444	0	0	11.8937	29.3747	OCRL
282	Positive Regulation Of Type I Interferon Production (GO:0032481)	1/64	0.0858897	0.124434	0	0	11.7043	28.7304	HSPD1
283	Response To Metal Ion (GO:0010038)	1/64	0.0858897	0.124434	0	0	11.7043	28.7304	MAPT
284	Regulation Of Tyrosine Phosphorylation Of STAT Protein (GO:0042509)	1/65	0.0871736	0.125849	0	0	11.5208	28.1092	OCRL
717	Mitochondrial Protein Import R-HSA-1268020	1/65	0.0871736	0.153888	0	0	11.5208	28.1092	HSPD1
285	Regulation Of Endocytosis (GO:0030100)	1/66	0.0884557	0.127252	0	0	11.343	27.5097	ABL2
286	Protein Secretion (GO:0009306)	1/67	0.0897361	0.128643	0	0	11.1706	26.931	AP1G1
448	Endosome Membrane (GO:0010008)	2/361	0.0903411	0.164324	0	0	4.20249	10.1035	CLTC;OCRL
449	Clathrin-Coated Endocytic Vesicle Membrane (GO:0030669)	1/68	0.0910147	0.164324	0	0	11.0033	26.372	CLTC
450	Spindle Microtubule (GO:0005876)	1/68	0.0910147	0.164324	0	0	11.0033	26.372	CLTC
287	Response To Molecule Of Bacterial Origin (GO:0002237)	1/69	0.0922917	0.131845	0	0	10.841	25.8319	PRDX3
451	Vesicle Membrane (GO:0012506)	1/69	0.0922917	0.164324	0	0	10.841	25.8319	AP1G1
718	Loss Of Nlp From Mitotic Centrosomes R-HSA-380259	1/69	0.0922917	0.161277	0	0	10.841	25.8319	CKAP5
288	Positive Regulation Of Protein Polymerization (GO:0032273)	1/70	0.0935669	0.133203	0	0	10.6833	25.3096	MAPT
289	Regulation Of Hydrolase Activity (GO:0051336)	1/71	0.0948403	0.134085	0	0	10.5302	24.8044	OCRL
290	Negative Regulation Of Supramolecular Fiber Organization (GO:1902904)	1/71	0.0948403	0.134085	0	0	10.5302	24.8044	HSPA8
719	AURKA Activation By TPX2 R-HSA-8854518	1/72	0.096112	0.165694	0	0	10.3813	24.3156	CKAP5
291	Regulation Of Rho Protein Signal Transduction (GO:0035023)	1/73	0.0973821	0.137205	0	0	10.2366	23.8423	ABL2
601	Inositol phosphate metabolism	1/73	0.0973821	0.176534	0	0	10.2366	23.8423	OCRL
720	Activation Of NMDA Receptors And Postsynaptic Events R-HSA-442755	1/74	0.0986504	0.165694	0	0	10.0959	23.3838	MAPT
721	RHOG GTPase Cycle R-HSA-9013408	1/74	0.0986504	0.165694	0	0	10.0959	23.3838	ARHGEF16
722	Cell Death Signaling Via NRAGE, NRIF And NADE R-HSA-204998	1/74	0.0986504	0.165694	0	0	10.0959	23.3838	ARHGEF16
292	Negative Regulation Of Programmed Cell Death (GO:0043069)	2/381	0.0989618	0.138953	0	0	3.97666	9.1981	PRDX3;HSPD1
293	Regulation Of Stress Fiber Assembly (GO:0051492)	1/75	0.0999169	0.139815	0	0	9.95896	22.9396	WASF2
294	Positive Regulation Of Interleukin-6 Production (GO:0032755)	1/76	0.101182	0.141104	0	0	9.82568	22.509	HSPD1
452	Focal Adhesion (GO:0005925)	2/387	0.101593	0.174425	0	0	3.91349	8.94928	HSPA8;CLTC
295	Regulation Of Transcription Elongation By RNA Polymerase II (GO:0034243)	1/77	0.102445	0.142381	0	0	9.69591	22.0914	TCERG1
296	Negative Regulation Of Protein Modification Process (GO:0031400)	1/78	0.103706	0.142683	0	0	9.5695	21.6863	MAPT
297	Organonitrogen Compound Catabolic Process (GO:1901565)	1/78	0.103706	0.142683	0	0	9.5695	21.6863	LNPEP
298	Cellular Response To Nutrient Levels (GO:0031669)	1/78	0.103706	0.142683	0	0	9.5695	21.6863	HSPA8
453	Glutamatergic Synapse (GO:0098978)	1/78	0.103706	0.174425	0	0	9.5695	21.6863	TANC1
602	Synaptic vesicle cycle	1/78	0.103706	0.176534	0	0	9.5695	21.6863	CLTC
603	Antigen processing and presentation	1/78	0.103706	0.176534	0	0	9.5695	21.6863	HSPA8
723	G Alpha (12/13) Signaling Events R-HSA-416482	1/78	0.103706	0.172512	0	0	9.5695	21.6863	ARHGEF16
299	Positive Regulation Of Protein Localization To Membrane (GO:1905477)	1/79	0.104966	0.143454	0	0	9.44634	21.2932	ARHGEF16
300	Negative Regulation Of Cellular Component Organization (GO:0051129)	1/79	0.104966	0.143454	0	0	9.44634	21.2932	HSPA8
604	RNA degradation	1/79	0.104966	0.176534	0	0	9.44634	21.2932	HSPD1
454	Cell-Substrate Junction (GO:0030055)	2/395	0.105133	0.174425	0	0	3.83226	8.63228	HSPA8;CLTC
724	Recruitment Of NuMA To Mitotic Centrosomes R-HSA-380320	1/80	0.106224	0.175017	0	0	9.3263	20.9115	CKAP5
301	Activation Of Protein Kinase Activity (GO:0032147)	1/81	0.10748	0.145917	0	0	9.20926	20.5408	OSBPL8
302	Macromolecule Modification (GO:0043412)	1/81	0.10748	0.145917	0	0	9.20926	20.5408	ABL2
725	Centrosome Maturation R-HSA-380287	1/81	0.10748	0.175416	0	0	9.20926	20.5408	CKAP5
726	PI Metabolism R-HSA-1483255	1/82	0.108735	0.175805	0	0	9.09511	20.1806	OCRL
455	Autophagosome (GO:0005776)	1/83	0.109988	0.178425	0	0	8.98374	19.8306	HSPA8
554	Phosphatase Activity (GO:0016791)	1/83	0.109988	0.152553	0	0	8.98374	19.8306	OCRL
303	Purine Ribonucleotide Metabolic Process (GO:0009150)	1/84	0.111239	0.150229	0	0	8.87506	19.4903	HSPA8
304	Positive Regulation Of Protein Localization (GO:1903829)	1/85	0.112489	0.150229	0	0	8.76896	19.1593	MAPT
305	mRNA Metabolic Process (GO:0016071)	1/85	0.112489	0.150229	0	0	8.76896	19.1593	TCERG1
306	Mitotic Spindle Organization (GO:0007052)	1/85	0.112489	0.150229	0	0	8.76896	19.1593	CKAP5
307	Positive Regulation Of Canonical Wnt Signaling Pathway (GO:0090263)	1/85	0.112489	0.150229	0	0	8.76896	19.1593	CCAR2
555	Protein Tyrosine Kinase Binding (GO:1990782)	1/85	0.112489	0.152553	0	0	8.76896	19.1593	ARHGEF16
556	Ribosome Binding (GO:0043022)	1/85	0.112489	0.152553	0	0	8.76896	19.1593	ZNF598
605	ErbB signaling pathway	1/85	0.112489	0.18096	0	0	8.76896	19.1593	ABL2
456	Lysosomal Lumen (GO:0043202)	1/86	0.113736	0.180495	0	0	8.66536	18.8374	HSPA8
308	Regulation Of Type II Interferon Production (GO:0032649)	1/87	0.114983	0.153061	0	0	8.56417	18.5241	HSPD1
727	Regulation Of PLK1 Activity At G2/M Transition R-HSA-2565942	1/87	0.114983	0.181147	0	0	8.56417	18.5241	CKAP5
309	Organelle Organization (GO:0006996)	2/418	0.115497	0.153248	0	0	3.61612	7.80546	PRDX3;ABI2
310	Positive Regulation Of Plasma Membrane Bounded Cell Projection Assembly (GO:0120034)	1/88	0.116227	0.15372	0	0	8.4653	18.2191	WASF2
728	PCP/CE Pathway R-HSA-4086400	1/88	0.116227	0.181147	0	0	8.4653	18.2191	CLTC
729	Regulation Of mRNA Stability By Proteins That Bind AU-rich Elements R-HSA-450531	1/88	0.116227	0.181147	0	0	8.4653	18.2191	HSPA8
730	Protein-protein Interactions At Synapses R-HSA-6794362	1/88	0.116227	0.181147	0	0	8.4653	18.2191	PDLIM5
311	Cellular Response To Chemical Stress (GO:0062197)	1/89	0.11747	0.154864	0	0	8.36869	17.9222	PRDX3
312	rRNA Metabolic Process (GO:0016072)	1/91	0.11995	0.157123	0	0	8.18189	17.3512	MAPT
313	Regulation Of Actin Cytoskeleton Organization (GO:0032956)	1/91	0.11995	0.157123	0	0	8.18189	17.3512	ABL2
731	EPH-Ephrin Signaling R-HSA-2682334	1/91	0.11995	0.18528	0	0	8.18189	17.3512	CLTC
314	B Cell Activation (GO:0042113)	1/92	0.121188	0.158239	0	0	8.09158	17.0766	HSPD1
315	Positive Regulation Of Protein Kinase B Signaling (GO:0051897)	1/93	0.122424	0.159345	0	0	8.00322	16.8089	OSBPL8
557	Phosphatidylinositol Bisphosphate Binding (GO:1902936)	1/93	0.122424	0.163783	0	0	8.00322	16.8089	MAPT
732	Unattached Kinetochores Signal Amplification Via A MAD2 Inhibitory Signal R-HSA-141444	1/93	0.122424	0.187428	0	0	8.00322	16.8089	CKAP5
316	Protein Ubiquitination (GO:0016567)	2/434	0.12286	0.159406	0	0	3.47934	7.29519	LNPEP;ZNF598
317	Cellular Response To Hormone Stimulus (GO:0032870)	1/94	0.123658	0.159434	0	0	7.91677	16.5479	HSPA8
318	Retrograde Transport, Endosome To Golgi (GO:0042147)	1/94	0.123658	0.159434	0	0	7.91677	16.5479	CLTC
733	P75 NTR Receptor-Mediated Signaling R-HSA-193704	1/95	0.124891	0.189527	0	0	7.83215	16.2933	ARHGEF16
319	Positive Regulation Of Supramolecular Fiber Organization (GO:1902905)	1/96	0.126122	0.1621	0	0	7.74932	16.045	MAPT
320	Regulation Of Protein Localization (GO:0032880)	1/97	0.127351	0.163169	0	0	7.66821	15.8027	MAPT
606	Phosphatidylinositol signaling system	1/97	0.127351	0.196333	0	0	7.66821	15.8027	OCRL
734	Anchoring Of Basal Body To Plasma Membrane R-HSA-5620912	1/97	0.127351	0.189929	0	0	7.66821	15.8027	CKAP5
735	EML4 And NUDC In Mitotic Spindle Formation R-HSA-9648025	1/97	0.127351	0.189929	0	0	7.66821	15.8027	CKAP5
321	Negative Regulation Of Macromolecule Biosynthetic Process (GO:0010558)	1/98	0.128579	0.163719	0	0	7.58877	15.5662	CLTC
322	Phosphatidylinositol Biosynthetic Process (GO:0006661)	1/98	0.128579	0.163719	0	0	7.58877	15.5662	OCRL
323	Axon Development (GO:0061564)	1/99	0.129805	0.164768	0	0	7.51096	15.3353	MAPT
558	Protein Tyrosine Kinase Activity (GO:0004713)	1/99	0.129805	0.171342	0	0	7.51096	15.3353	ABL2
324	Regulation Of Organelle Organization (GO:0033043)	1/100	0.131029	0.165298	0	0	7.43472	15.1098	MAPT
325	Response To UV (GO:0009411)	1/100	0.131029	0.165298	0	0	7.43472	15.1098	CCAR2
326	Hemopoiesis (GO:0030097)	1/101	0.132252	0.166329	0	0	7.36	14.8896	PRDX3
327	Negative Regulation Of Nucleic Acid-Templated Transcription (GO:1903507)	2/456	0.133172	0.166841	0	0	3.30701	6.66733	HSPA8;CCAR2
559	Transition Metal Ion Binding (GO:0046914)	2/456	0.133172	0.173474	0	0	3.30701	6.66733	ABL2;LNPEP
328	Protein Catabolic Process (GO:0030163)	1/102	0.133473	0.166841	0	0	7.28676	14.6745	HSPA8
607	Longevity regulating pathway	1/102	0.133473	0.19754	0	0	7.28676	14.6745	HSPA8
736	Antigen processing-Cross Presentation R-HSA-1236975	1/104	0.13591	0.199258	0	0	7.14455	14.2588	LNPEP
737	Cargo Recognition For Clathrin-Mediated Endocytosis R-HSA-8856825	1/104	0.13591	0.199258	0	0	7.14455	14.2588	CLTC
329	Lysosomal Transport (GO:0007041)	1/105	0.137126	0.170887	0	0	7.0755	14.058	AP1G1
330	Positive Regulation Of Cell Growth (GO:0030307)	1/106	0.13834	0.171878	0	0	7.00776	13.8616	MAPT
560	Phosphatidylinositol Binding (GO:0035091)	1/106	0.13834	0.177866	0	0	7.00776	13.8616	MAPT
738	Resolution Of Sister Chromatid Cohesion R-HSA-2500257	1/106	0.13834	0.201117	0	0	7.00776	13.8616	CKAP5
331	Regulation Of Cellular Response To Stress (GO:0080135)	1/107	0.139553	0.17286	0	0	6.9413	13.6696	MAPT
739	Interleukin-4 And Interleukin-13 Signaling R-HSA-6785807	1/107	0.139553	0.201189	0	0	6.9413	13.6696	HSPA8
332	Glycerophospholipid Biosynthetic Process (GO:0046474)	1/108	0.140764	0.173242	0	0	6.87608	13.4817	OCRL
333	Lipid Transport (GO:0006869)	1/108	0.140764	0.173242	0	0	6.87608	13.4817	OSBPL8
334	Negative Regulation Of Developmental Process (GO:0051093)	1/109	0.141974	0.173242	0	0	6.81207	13.2979	MAPT
335	Regulation Of Proteasomal Ubiquitin-Dependent Protein Catabolic Process (GO:0032434)	1/109	0.141974	0.173242	0	0	6.81207	13.2979	CCAR2
336	Positive Regulation Of Wnt Signaling Pathway (GO:0030177)	1/109	0.141974	0.173242	0	0	6.81207	13.2979	CCAR2
337	Response To Lipid (GO:0033993)	1/110	0.143182	0.174197	0	0	6.74924	13.1181	PRDX3
740	Mitotic Spindle Checkpoint R-HSA-69618	1/110	0.143182	0.204714	0	0	6.74924	13.1181	CKAP5
338	T Cell Activation (GO:0042110)	1/111	0.144388	0.175145	0	0	6.68754	12.9421	HSPD1
608	Toxoplasmosis	1/112	0.145592	0.207189	0	0	6.62696	12.7698	HSPA8
339	Negative Regulation Of Apoptotic Process (GO:0043066)	2/482	0.145612	0.176109	0	0	3.12372	6.0188	PRDX3;HSPD1
340	Regulation Of Cytoskeleton Organization (GO:0051493)	1/114	0.147996	0.177943	0	0	6.50901	12.4359	MAPT
341	Regulation Of Interleukin-6 Production (GO:0032675)	1/114	0.147996	0.177943	0	0	6.50901	12.4359	HSPD1
741	Macroautophagy R-HSA-1632852	1/114	0.147996	0.208158	0	0	6.50901	12.4359	HSPA8
742	Signaling By NTRK1 (TRKA) R-HSA-187037	1/114	0.147996	0.208158	0	0	6.50901	12.4359	CLTC
457	Cytoplasmic Vesicle Lumen (GO:0060205)	1/115	0.149196	0.228724	0	0	6.45159	12.2741	HSPA8
561	Protein Phosphatase Binding (GO:0019903)	1/115	0.149196	0.189364	0	0	6.45159	12.2741	MAPT
458	Early Endosome Membrane (GO:0031901)	1/116	0.150394	0.228724	0	0	6.39517	12.1156	OCRL
342	Protein Maturation (GO:0051604)	1/117	0.151591	0.181731	0	0	6.33972	11.9603	HSPD1
343	Regulation Of Small GTPase Mediated Signal Transduction (GO:0051056)	1/118	0.152785	0.18263	0	0	6.28522	11.8082	ARHGAP29
344	Regulation Of Protein-Containing Complex Assembly (GO:0043254)	1/119	0.153978	0.183454	0	0	6.23164	11.659	HSPA8
743	RHO GTPases Activate Formins R-HSA-5663220	1/119	0.153978	0.214825	0	0	6.23164	11.659	CKAP5
345	Protein Phosphorylation (GO:0006468)	2/500	0.15437	0.183454	0	0	3.00803	5.62022	ABI2;ABL2
459	Ficolin-1-Rich Granule Lumen (GO:1904813)	1/123	0.158735	0.236482	0	0	6.02611	11.0912	HSPA8
346	Negative Regulation Of Growth (GO:0045926)	1/124	0.15992	0.1895	0	0	5.97681	10.956	CCAR2
562	Metallopeptidase Activity (GO:0008237)	1/124	0.15992	0.199365	0	0	5.97681	10.956	LNPEP
347	Negative Regulation Of Cell Growth (GO:0030308)	1/125	0.161103	0.190353	0	0	5.92832	10.8234	CCAR2
563	Protease Binding (GO:0002020)	1/125	0.161103	0.199365	0	0	5.92832	10.8234	CLTC
348	Protein-Containing Complex Organization (GO:0043933)	1/126	0.162285	0.19065	0	0	5.88059	10.6933	WASF1
349	Cellular Response To Starvation (GO:0009267)	1/126	0.162285	0.19065	0	0	5.88059	10.6933	HSPA8
744	Glycerophospholipid Biosynthesis R-HSA-1483206	1/127	0.163465	0.226059	0	0	5.83363	10.5656	OSBPL8
460	Intracellular Membrane-Bounded Organelle (GO:0043231)	10/5175	0.164275	0.239841	0	0	1.59266	2.87669	PRDX3;TCERG1;HSPA8;OSBPL8;AP1G1;HDLBP;MTUS1;OCRL;MAPT;CCAR2
745	Autophagy R-HSA-9612973	1/128	0.164644	0.226059	0	0	5.7874	10.4403	HSPA8
746	Host Interactions Of HIV Factors R-HSA-162909	1/130	0.166996	0.227483	0	0	5.6971	10.1966	AP1G1
350	Synapse Organization (GO:0050808)	1/131	0.16817	0.196999	0	0	5.65299	10.078	MAPT
351	Plasma Membrane Bounded Cell Projection Organization (GO:0120036)	1/132	0.169343	0.197246	0	0	5.60956	9.96163	MAPT
352	Circulatory System Development (GO:0072359)	1/132	0.169343	0.197246	0	0	5.60956	9.96163	PDLIM5
747	Signaling By NTRKs R-HSA-166520	1/132	0.169343	0.228877	0	0	5.60956	9.96163	CLTC
461	Asymmetric Synapse (GO:0032279)	1/133	0.170513	0.244068	0	0	5.56678	9.84731	PDLIM5
353	Negative Regulation Of DNA-templated Transcription (GO:0045892)	3/1025	0.171148	0.198784	0	0	2.22505	3.92771	TCERG1;HSPA8;CCAR2
354	Non-Membrane-Bounded Organelle Assembly (GO:0140694)	1/135	0.17285	0.200193	0	0	5.48314	9.62474	MAPT
355	Regulation Of Protein Kinase B Signaling (GO:0051896)	1/136	0.174016	0.200976	0	0	5.44225	9.51638	OSBPL8
609	Estrogen signaling pathway	1/137	0.17518	0.234558	0	0	5.40196	9.4099	HSPA8
610	Measles	1/139	0.177504	0.234558	0	0	5.32313	9.20244	HSPA8
748	Death Receptor Signaling R-HSA-73887	1/139	0.177504	0.238048	0	0	5.32313	9.20244	ARHGEF16
564	G Protein-Coupled Receptor Binding (GO:0001664)	1/140	0.178663	0.218366	0	0	5.28457	9.10137	HSPA8
749	Beta-catenin Independent WNT Signaling R-HSA-3858494	1/142	0.180978	0.240839	0	0	5.20909	8.90432	CLTC
462	Mitotic Spindle (GO:0072686)	1/143	0.182132	0.251715	0	0	5.17214	8.80827	CLTC
463	Neuron Projection (GO:0043005)	2/557	0.182752	0.251715	0	0	2.6912	4.57403	HSPA8;MAPT
356	Actin Filament Organization (GO:0007015)	1/144	0.183286	0.210496	0	0	5.13572	8.71382	ABI2
357	Regulation Of Cell Adhesion (GO:0030155)	1/144	0.183286	0.210496	0	0	5.13572	8.71382	ABL2
358	Regulation Of Cold-Induced Thermogenesis (GO:0120161)	1/146	0.185588	0.211952	0	0	5.06437	8.52955	LNPEP
359	Negative Regulation Of Response To External Stimulus (GO:0032102)	1/146	0.185588	0.211952	0	0	5.06437	8.52955	OCRL
750	RHOA GTPase Cycle R-HSA-8980692	1/147	0.186736	0.246431	0	0	5.02943	8.43967	ARHGAP29
751	Developmental Biology R-HSA-1266738	3/1073	0.188028	0.246431	0	0	2.11985	3.54262	HSPA8;CLTC;ABL2
360	Skeletal System Development (GO:0001501)	1/149	0.189029	0.215282	0	0	4.96096	8.26425	KIAA1217
361	Neuron Development (GO:0048666)	1/150	0.190172	0.215985	0	0	4.92742	8.17865	MAPT
464	Adherens Junction (GO:0005912)	1/150	0.190172	0.253927	0	0	4.92742	8.17865	PDLIM5
465	Postsynaptic Density (GO:0014069)	1/151	0.191315	0.253927	0	0	4.89432	8.0944	PDLIM5
362	Cellular Response To Organic Cyclic Compound (GO:0071407)	1/152	0.192455	0.217374	0	0	4.86166	8.01149	HSPA8
363	Positive Regulation Of NF-kappaB Transcription Factor Activity (GO:0051092)	1/152	0.192455	0.217374	0	0	4.86166	8.01149	PRDX3
364	Cellular Response To Growth Factor Stimulus (GO:0071363)	1/155	0.195869	0.220621	0	0	4.76623	7.77045	MAPT
565	Magnesium Ion Binding (GO:0000287)	1/155	0.195869	0.236475	0	0	4.76623	7.77045	ABL2
752	Influenza Infection R-HSA-168255	1/157	0.198136	0.257726	0	0	4.70465	7.6159	CLTC
365	Response To Lipopolysaccharide (GO:0032496)	1/159	0.200398	0.225104	0	0	4.64463	7.46602	PRDX3
466	Endocytic Vesicle Membrane (GO:0030666)	1/159	0.200398	0.259538	0	0	4.64463	7.46602	CLTC
366	Positive Regulation Of Cellular Process (GO:0048522)	2/594	0.201598	0.225834	0	0	2.51819	4.03283	PRDX3;MAPT
467	Vacuolar Lumen (GO:0005775)	1/161	0.202653	0.259538	0	0	4.58611	7.32063	HSPA8
367	Adenylate Cyclase-Modulating G Protein-Coupled Receptor Signaling Pathway (GO:0007188)	1/163	0.204902	0.22891	0	0	4.52904	7.17953	WASF2
753	Protein Localization R-HSA-9609507	1/164	0.206024	0.265987	0	0	4.50102	7.11054	HSPD1
468	Membrane Raft (GO:0045121)	1/169	0.211613	0.26634	0	0	4.36596	6.78032	MAPT
754	Separation Of Sister Chromatids R-HSA-2467813	1/170	0.212726	0.272604	0	0	4.33991	6.71709	CKAP5
368	Heart Development (GO:0007507)	1/171	0.213838	0.238243	0	0	4.31416	6.65476	PDLIM5
611	Protein processing in endoplasmic reticulum	1/171	0.213838	0.272827	0	0	4.31416	6.65476	HSPA8
369	Generation Of Neurons (GO:0048699)	1/172	0.214948	0.238831	0	0	4.28872	6.5933	MAPT
755	Apoptosis R-HSA-109581	1/178	0.221577	0.278653	0	0	4.14208	6.24206	MAPT
370	RNA Splicing, Via Transesterification Reactions With Bulged Adenosine As Nucleophile (GO:0000377)	1/180	0.223774	0.247298	0	0	4.09539	6.13127	HSPA8
371	Endosomal Transport (GO:0016197)	1/180	0.223774	0.247298	0	0	4.09539	6.13127	CLTC
612	Tuberculosis	1/180	0.223774	0.275988	0	0	4.09539	6.13127	HSPD1
756	mRNA Splicing - Major Pathway R-HSA-72163	1/181	0.224871	0.278653	0	0	4.07243	6.07699	HSPA8
757	G2/M Transition R-HSA-69275	1/182	0.225966	0.278653	0	0	4.04972	6.02344	CKAP5
758	Neurotransmitter Receptors And Postsynaptic Signal Transmission R-HSA-112314	1/182	0.225966	0.278653	0	0	4.04972	6.02344	MAPT
759	Cellular Response To Chemical Stress R-HSA-9711123	1/182	0.225966	0.278653	0	0	4.04972	6.02344	PRDX3
372	Phosphate-Containing Compound Metabolic Process (GO:0006796)	1/184	0.228152	0.251458	0	0	4.00506	5.91845	OCRL
469	Ficolin-1-Rich Granule (GO:0101002)	1/184	0.228152	0.278912	0	0	4.00506	5.91845	HSPA8
760	Mitotic G2-G2/M Phases R-HSA-453274	1/184	0.228152	0.278653	0	0	4.00506	5.91845	CKAP5
470	Microtubule (GO:0005874)	1/185	0.229242	0.278912	0	0	3.98309	5.867	MAPT
373	Negative Regulation Of Macromolecule Metabolic Process (GO:0010605)	1/186	0.230332	0.253179	0	0	3.96136	5.81621	MAPT
761	Cilium Assembly R-HSA-5617833	1/186	0.230332	0.278653	0	0	3.96136	5.81621	CKAP5
762	Mitotic Prometaphase R-HSA-68877	1/186	0.230332	0.278653	0	0	3.96136	5.81621	CKAP5
763	mRNA Splicing R-HSA-72172	1/189	0.23359	0.280632	0	0	3.89756	5.66778	HSPA8
374	Neuron Projection Development (GO:0031175)	1/192	0.236835	0.259632	0	0	3.83576	5.52499	MAPT
375	Regulation Of Programmed Cell Death (GO:0043067)	1/195	0.240067	0.262473	0	0	3.77587	5.38755	ABL2
566	Guanyl-Nucleotide Exchange Factor Activity (GO:0005085)	1/203	0.248621	0.296548	0	0	3.62486	5.04517	ARHGEF16
471	Axon (GO:0030424)	1/205	0.250745	0.300072	0	0	3.58896	4.96467	MAPT
376	Regulation Of Canonical Wnt Signaling Pathway (GO:0060828)	1/207	0.252863	0.275729	0	0	3.55376	4.88608	CCAR2
377	Protein Stabilization (GO:0050821)	1/208	0.25392	0.276147	0	0	3.53641	4.84748	HSPD1
764	Programmed Cell Death R-HSA-5357801	1/208	0.25392	0.302129	0	0	3.53641	4.84748	MAPT
765	Signaling By ROBO Receptors R-HSA-376176	1/209	0.254976	0.302129	0	0	3.51923	4.80933	ABL2
378	mRNA Splicing, Via Spliceosome (GO:0000398)	1/211	0.257083	0.278846	0	0	3.48536	4.73437	HSPA8
766	Cytokine Signaling In Immune System R-HSA-1280215	2/702	0.257746	0.303333	0	0	2.1178	2.87128	HSPA8;ABL2
613	Human immunodeficiency virus 1 infection	1/212	0.258134	0.308095	0	0	3.46867	4.69754	AP1G1
767	Transport Of Small Molecules R-HSA-382551	2/706	0.259843	0.303736	0	0	2.10533	2.83731	CLTC;HDLBP
379	Regulation Of GTPase Activity (GO:0043087)	1/214	0.260232	0.281517	0	0	3.43575	4.62515	OCRL
768	Metabolism Of Lipids R-HSA-556833	2/732	0.27349	0.317542	0	0	2.02761	2.62878	OSBPL8;OCRL
380	Regulation Of Cell Growth (GO:0001558)	1/227	0.27373	0.294898	0	0	3.23599	4.19259	CCAR2
381	Apoptotic Process (GO:0006915)	1/228	0.274759	0.294898	0	0	3.22157	4.16182	HSPD1
382	Cilium Organization (GO:0044782)	1/228	0.274759	0.294898	0	0	3.22157	4.16182	OCRL
567	RNA Polymerase II-specific DNA-binding Transcription Factor Binding (GO:0061629)	1/228	0.274759	0.323823	0	0	3.22157	4.16182	TCERG1
769	HIV Infection R-HSA-162906	1/229	0.275786	0.318073	0	0	3.20728	4.13139	AP1G1
383	Negative Regulation Of Multicellular Organismal Process (GO:0051241)	1/231	0.277836	0.297422	0	0	3.17907	4.07151	LNPEP
614	Ras signaling pathway	1/232	0.278858	0.32243	0	0	3.16514	4.04205	ABL2
770	Mitotic Anaphase R-HSA-68882	1/232	0.278858	0.318548	0	0	3.16514	4.04205	CKAP5
771	Mitotic Metaphase And Anaphase R-HSA-2555396	1/233	0.27988	0.318548	0	0	3.15134	4.0129	CKAP5
772	Processing Of Capped Intron-Containing Pre-mRNA R-HSA-72203	1/242	0.28901	0.326789	0	0	3.03227	3.76394	HSPA8
384	Cilium Assembly (GO:0060271)	1/243	0.290018	0.309655	0	0	3.01959	3.73769	OCRL
385	Positive Regulation Of DNA-binding Transcription Factor Activity (GO:0051091)	1/246	0.293032	0.31206	0	0	2.98216	3.66052	PRDX3
472	Nucleolus (GO:0005730)	2/771	0.293965	0.346097	0	0	1.92088	2.35172	MTUS1;CKAP5
615	Parkinson disease	1/249	0.296035	0.331918	0	0	2.94564	3.58567	MAPT
473	Nuclear Lumen (GO:0031981)	2/780	0.298686	0.346097	0	0	1.89777	2.29319	MTUS1;CKAP5
386	Cellular Component Assembly (GO:0022607)	1/260	0.306938	0.326022	0	0	2.81896	3.32951	WASF1
474	Polymeric Cytoskeletal Fiber (GO:0099513)	1/265	0.311839	0.355692	0	0	2.76487	3.22181	MAPT
773	Cell Cycle Checkpoints R-HSA-69620	1/271	0.317678	0.356872	0	0	2.70261	3.09913	CKAP5
616	Prion disease	1/273	0.319613	0.347814	0	0	2.68246	3.05974	HSPA8
387	Plasma Membrane Bounded Cell Projection Assembly (GO:0120031)	1/275	0.321543	0.340653	0	0	2.66261	3.02106	OCRL
774	Organelle Biogenesis And Maintenance R-HSA-1852241	1/275	0.321543	0.358884	0	0	2.66261	3.02106	CKAP5
568	ATP Binding (GO:0005524)	1/279	0.325388	0.373534	0	0	2.62377	2.9458	HSPA8
569	DNA-binding Transcription Factor Binding (GO:0140297)	1/282	0.328257	0.373534	0	0	2.59536	2.89112	TCERG1
570	mRNA Binding (GO:0003729)	1/282	0.328257	0.373534	0	0	2.59536	2.89112	HDLBP
571	DNA Binding (GO:0003677)	2/846	0.333174	0.374821	0	0	1.74335	1.91609	MAPT;HSPD1
775	Signaling By WNT R-HSA-195721	1/294	0.339618	0.376628	0	0	2.48755	2.68639	CLTC
388	Gene Expression (GO:0010467)	1/296	0.341493	0.360856	0	0	2.47043	2.6543	HSPD1
475	Cell-Cell Junction (GO:0005911)	1/299	0.344297	0.386672	0	0	2.44519	2.60719	PDLIM5
617	Huntington disease	1/306	0.350793	0.370839	0	0	2.38822	2.5018	CLTC
776	Antigen Processing: Ubiquitination And Proteasome Degradation R-HSA-983168	1/307	0.351716	0.38756	0	0	2.3803	2.48724	LNPEP
572	Adenyl Ribonucleotide Binding (GO:0032559)	1/309	0.353559	0.390935	0	0	2.3646	2.45849	HSPA8
573	Ubiquitin Protein Ligase Activity (GO:0061630)	1/311	0.355396	0.390935	0	0	2.3491	2.4302	ZNF598
389	Protein Transport (GO:0015031)	1/313	0.357228	0.376513	0	0	2.33381	2.40238	CLTC
476	Secretory Granule Lumen (GO:0034774)	1/316	0.359967	0.398145	0	0	2.31123	2.36148	HSPA8
390	Proteasome-Mediated Ubiquitin-Dependent Protein Catabolic Process (GO:0043161)	1/319	0.362694	0.381269	0	0	2.28908	2.32157	ZNF598
574	Ubiquitin-Like Protein Ligase Activity (GO:0061659)	1/319	0.362694	0.394579	0	0	2.28908	2.32157	ZNF598
391	Positive Regulation Of Cytokine Production (GO:0001819)	1/320	0.363601	0.381269	0	0	2.28178	2.30848	HSPD1
392	Intracellular Protein Transport (GO:0006886)	1/325	0.368116	0.385019	0	0	2.246	2.24456	CLTC
393	Proteolysis (GO:0006508)	1/330	0.3726	0.388717	0	0	2.2113	2.18311	LNPEP
394	Negative Regulation Of Gene Expression (GO:0010629)	1/336	0.37794	0.393288	0	0	2.17103	2.11246	MAPT
575	Zinc Ion Binding (GO:0008270)	1/341	0.382357	0.411449	0	0	2.13856	2.05602	LNPEP
395	Protein Localization (GO:0008104)	1/351	0.391099	0.405951	0	0	2.0764	1.94931	CLTC
396	Positive Regulation Of Macromolecule Metabolic Process (GO:0010604)	1/364	0.402287	0.41546	0	0	2.00071	1.82183	OCRL
397	Protein Modification By Small Protein Conjugation (GO:0032446)	1/364	0.402287	0.41546	0	0	2.00071	1.82183	ZNF598
618	Alzheimer disease	1/369	0.406537	0.417829	0	0	1.97303	1.77589	MAPT
477	Mitochondrial Inner Membrane (GO:0005743)	1/370	0.407383	0.443865	0	0	1.96758	1.76689	HSPD1
777	Class I MHC Mediated Antigen Processing And Presentation R-HSA-983169	1/378	0.414113	0.452394	0	0	1.92504	1.69715	LNPEP
778	M Phase R-HSA-68886	1/380	0.415784	0.452394	0	0	1.91469	1.68031	CKAP5
398	DNA Damage Response (GO:0006974)	1/384	0.419112	0.431749	0	0	1.8943	1.64732	MAPT
478	Cytoplasmic Vesicle Membrane (GO:0030659)	1/389	0.423246	0.454367	0	0	1.86942	1.60733	AP1G1
479	Organelle Inner Membrane (GO:0019866)	1/398	0.430617	0.45558	0	0	1.8262	1.53864	HSPD1
399	Vesicle-Mediated Transport (GO:0016192)	1/411	0.441103	0.453264	0	0	1.76712	1.44635	AP1G1
576	Ubiquitin-Protein Transferase Activity (GO:0004842)	1/412	0.441902	0.470412	0	0	1.76273	1.43956	ZNF598
480	Nucleus (GO:0005634)	7/4487	0.444134	0.463169	0	0	1.15268	0.935546	TCERG1;HSPA8;HDLBP;MTUS1;OCRL;MAPT;CCAR2
779	Diseases Of Signal Transduction By Growth Factor Receptors And Second Messengers R-HSA-5663202	1/424	0.451403	0.488079	0	0	1.71167	1.36145	CLTC
481	Golgi Membrane (GO:0000139)	1/427	0.453754	0.466536	0	0	1.69936	1.34283	AP1G1
780	Signaling By Interleukins R-HSA-449147	1/453	0.473724	0.509033	0	0	1.59948	1.19502	HSPA8
781	Neutrophil Degranulation R-HSA-6798695	1/468	0.484923	0.51785	0	0	1.54691	1.1196	HSPA8
619	Pathways of neurodegeneration	1/475	0.490071	0.490071	0	0	1.52352	1.08658	MAPT
577	Purine Ribonucleoside Triphosphate Binding (GO:0035639)	1/476	0.490802	0.516908	0	0	1.52023	1.08197	HSPA8
400	Positive Regulation Of Cell Population Proliferation (GO:0008284)	1/483	0.495893	0.50829	0	0	1.49762	1.05042	PRDX3
578	Metal Ion Binding (GO:0046872)	1/521	0.522682	0.54469	0	0	1.38547	0.898867	ABL2
782	Cell Cycle, Mitotic R-HSA-69278	1/523	0.524054	0.556204	0	0	1.38002	0.891715	CKAP5
401	Positive Regulation Of Intracellular Signal Transduction (GO:1902533)	1/525	0.525421	0.537214	0	0	1.37461	0.884638	OSBPL8
402	Negative Regulation Of Cellular Process (GO:0048523)	1/537	0.533547	0.544165	0	0	1.34301	0.843688	CCAR2
482	Mitochondrial Membrane (GO:0031966)	1/540	0.535557	0.542996	0	0	1.33533	0.833841	HSPD1
783	GPCR Downstream Signaling R-HSA-388396	1/619	0.585589	0.617725	0	0	1.15989	0.620703	ARHGEF16
579	Double-Stranded DNA Binding (GO:0003690)	1/650	0.603766	0.622633	0	0	1.10272	0.5564	MAPT
784	Cell Cycle R-HSA-1640170	1/654	0.606054	0.635439	0	0	1.09574	0.548731	CKAP5
580	Protein Homodimerization Activity (GO:0042803)	1/662	0.610593	0.623183	0	0	1.08203	0.533792	OCRL
785	Metabolism Of RNA R-HSA-8953854	1/666	0.612844	0.638687	0	0	1.0753	0.526515	HSPA8
786	Signaling By GPCR R-HSA-372790	1/689	0.625544	0.648018	0	0	1.03811	0.487015	ARHGEF16
403	Protein Modification Process (GO:0036211)	1/711	0.637314	0.648384	0	0	1.0048	0.452654	ABL2
581	Sequence-Specific Double-Stranded DNA Binding (GO:1990837)	1/715	0.639416	0.640462	0	0	0.998963	0.446736	HSPD1
582	Sequence-Specific DNA Binding (GO:0043565)	1/717	0.640462	0.640462	0	0	0.996069	0.443813	MAPT
404	Negative Regulation Of Transcription By RNA Polymerase II (GO:0000122)	1/763	0.663735	0.673414	0	0	0.933703	0.382698	TCERG1
405	Regulation Of Cell Population Proliferation (GO:0042127)	1/766	0.665202	0.673414	0	0	0.929896	0.379086	PRDX3
483	Bounding Membrane Of Organelle (GO:0098588)	1/819	0.690112	0.690112	0	0	0.867246	0.321663	AP1G1
406	Positive Regulation Of Transcription By RNA Polymerase II (GO:0045944)	1/938	0.7397	0.746987	0	0	0.752401	0.226857	TCERG1
787	Metabolism Of Proteins R-HSA-392499	2/1890	0.756764	0.779287	0	0	0.736799	0.205349	PCMT1;HSPA8
407	Regulation Of DNA-templated Transcription (GO:0006355)	2/1922	0.765292	0.770933	0	0	0.723237	0.193464	HSPA8;CCAR2
788	Metabolism R-HSA-1430728	2/2049	0.796744	0.815601	0	0	0.673594	0.153056	OSBPL8;OCRL
408	Regulation Of Gene Expression (GO:0010468)	1/1127	0.803112	0.807049	0	0	0.619893	0.135918	MAPT
789	Generic Transcription Pathway R-HSA-212436	1/1190	0.820721	0.835204	0	0	0.585086	0.115597	HSPD1
409	Positive Regulation Of DNA-templated Transcription (GO:0045893)	1/1243	0.834349	0.836389	0	0	0.558538	0.101153	TCERG1
790	RNA Polymerase II Transcription R-HSA-73857	1/1312	0.850602	0.86055	0	0	0.527192	0.0853056	HSPD1
791	Post-translational Protein Modification R-HSA-597592	1/1383	0.865716	0.870749	0	0	0.498204	0.0718405	HSPA8
792	Gene Expression (Transcription) R-HSA-74160	1/1449	0.878435	0.878435	0	0	0.473808	0.0614118	HSPD1
410	Regulation Of Transcription By RNA Polymerase II (GO:0006357)	1/2028	0.950003	0.950003	0	0	0.327888	0.0168175	TCERG1

## Sheet: Cluster4
	Term	Overlap	P.value	Adjusted.P.value	Old.P.value	Old.Adjusted.P.value	Odds.Ratio	Combined.Score	Genes
1	Bundle Of His cell-Purkinje Myocyte Adhesion Involved In Cell Communication (GO:0086073)	3/5	2.14331e-09	4.17793e-07	0	0	2997.75	59837.8	DSP;JUP;DSG2
2	Cardiac Muscle Cell-Cardiac Muscle Cell Adhesion (GO:0086042)	3/6	4.28506e-09	4.17793e-07	0	0	1998.4	38505.4	DSP;JUP;DSG2
3	Bundle Of His Cell To Purkinje Myocyte Communication (GO:0086069)	3/8	1.19894e-08	7.7931e-07	0	0	1198.92	21867.4	DSP;JUP;DSG2
243	Protein Binding Involved In Heterotypic Cell-Cell Adhesion (GO:0086080)	3/9	1.79775e-08	7.91008e-07	0	0	999.05	17817.2	DSP;JUP;DSG2
4	Regulation Of Ventricular Cardiac Muscle Cell Action Potential (GO:0098911)	3/11	3.52868e-08	1.72023e-06	0	0	749.212	12856.3	DSP;JUP;DSG2
196	Desmosome (GO:0030057)	3/17	1.451e-07	6.81972e-06	0	0	427.993	6739.11	DSP;JUP;DSG2
5	Regulation Of Cardiac Muscle Cell Contraction (GO:0086004)	3/26	5.52936e-07	2.15645e-05	0	0	260.4	3751.85	DSP;JUP;DSG2
6	Regulation Of Cardiac Muscle Cell Action Potential (GO:0098901)	3/28	6.96179e-07	2.16232e-05	0	0	239.544	3396.17	DSP;JUP;DSG2
7	Heterotypic Cell-Cell Adhesion (GO:0034113)	3/29	7.76217e-07	2.16232e-05	0	0	230.319	3240.32	DSP;JUP;DSG2
197	Intercalated Disc (GO:0014704)	3/31	9.54157e-07	2.24227e-05	0	0	213.846	2964.43	DSP;JUP;DSG2
8	Regulation Of Heart Rate By Cardiac Conduction (GO:0086091)	3/41	2.25435e-06	5.49499e-05	0	0	157.492	2047.81	DSP;JUP;DSG2
198	Cornified Envelope (GO:0001533)	3/41	2.25435e-06	3.53182e-05	0	0	157.492	2047.81	DSP;JUP;DSG2
9	Cardiac Conduction (GO:0061337)	3/46	3.20423e-06	6.94249e-05	0	0	139.144	1760.32	DSP;JUP;DSG2
199	Cell-Cell Contact Zone (GO:0044291)	3/47	3.42142e-06	4.02016e-05	0	0	135.975	1711.31	DSP;JUP;DSG2
10	Desmosome Organization (GO:0002934)	2/6	5.84131e-06	0.000113906	0	0	908.318	10945.7	DSP;JUP
287	Arrhythmogenic right ventricular cardiomyopathy	3/77	1.52623e-05	0.000259458	0	0	80.7284	895.288	DSP;JUP;DSG2
11	Epithelial Cell-Cell Adhesion (GO:0090136)	2/11	2.13792e-05	0.000378995	0	0	403.596	4339.9	DSP;JUP
304	Apoptosis R-HSA-109581	3/178	0.000185646	0.011451	0	0	33.9634	291.803	NMT1;DSG2;VIM
200	Ficolin-1-Rich Granule (GO:0101002)	3/184	0.00020471	0.00192427	0	0	32.8276	278.835	DSP;XRCC6;JUP
305	Apoptotic Cleavage Of Cellular Proteins R-HSA-111465	2/38	0.000270579	0.011451	0	0	100.763	827.76	DSG2;VIM
306	Programmed Cell Death R-HSA-5357801	3/208	0.000293616	0.011451	0	0	28.9493	235.451	NMT1;DSG2;VIM
307	Developmental Biology R-HSA-1266738	5/1073	0.000394572	0.0115412	0	0	11.0715	86.7753	ABLIM1;JUP;NCOA6;DSG2;DNM2
308	Apoptotic Execution Phase R-HSA-75153	2/52	0.000507756	0.0118815	0	0	72.4982	549.936	DSG2;VIM
201	Polymeric Cytoskeletal Fiber (GO:0099513)	3/265	0.000596169	0.00466999	0	0	22.5859	167.7	DSP;VIM;DNM2
202	Cell-Cell Junction (GO:0005911)	3/299	0.00084654	0.00524496	0	0	19.9571	141.184	DSP;JUP;DSG2
12	Cell-Cell Junction Organization (GO:0045216)	2/68	0.0008672	0.013008	0	0	54.8788	386.909	DSP;DSG2
13	Intermediate Filament Organization (GO:0045109)	2/68	0.0008672	0.013008	0	0	54.8788	386.909	DSP;VIM
203	Intermediate Filament (GO:0005882)	2/69	0.00089276	0.00524496	0	0	54.057	379.545	DSP;VIM
309	Formation Of Cornified Envelope R-HSA-6809371	2/74	0.00102597	0.0200065	0	0	50.2904	346.104	JUP;DSG2
204	Intermediate Filament Cytoskeleton (GO:0045111)	2/81	0.00122756	0.00641059	0	0	45.8182	307.107	DSP;VIM
205	Focal Adhesion (GO:0005925)	3/387	0.00177975	0.00806269	0	0	15.3148	96.9626	JUP;VIM;DNM2
206	Cell-Substrate Junction (GO:0030055)	3/395	0.00188701	0.00806269	0	0	14.9962	94.0674	JUP;VIM;DNM2
310	RHO GTPase Cycle R-HSA-9012999	3/441	0.0025829	0.0431713	0	0	13.3897	79.7873	JUP;DSG2;VIM
207	Ficolin-1-Rich Granule Lumen (GO:1904813)	2/123	0.0027993	0.0109639	0	0	29.8512	175.477	XRCC6;JUP
14	Positive Regulation Of Intracellular Protein Transport (GO:0090316)	2/126	0.00293487	0.0372341	0	0	29.1246	169.828	JUP;NMT1
15	Negative Regulation Of Histone Acetylation (GO:0035067)	1/5	0.00324605	0.0372341	0	0	416.312	2385.6	SET
16	Ventricular Compact Myocardium Morphogenesis (GO:0003223)	1/5	0.00324605	0.0372341	0	0	416.312	2385.6	DSP
17	Double-Strand Break Repair Via Classical Nonhomologous End Joining (GO:0097680)	1/5	0.00324605	0.0372341	0	0	416.312	2385.6	XRCC6
208	Zonula Adherens (GO:0005915)	1/5	0.00324605	0.0117357	0	0	416.312	2385.6	JUP
244	Keratin Filament Binding (GO:1990254)	1/5	0.00324605	0.0713064	0	0	416.312	2385.6	VIM
311	NOSTRIN Mediated eNOS Trafficking R-HSA-203641	1/5	0.00324605	0.0465895	0	0	416.312	2385.6	DNM2
209	Hemidesmosome (GO:0030056)	1/6	0.0038941	0.0129352	0	0	333.033	1847.77	JUP
312	HIV Life Cycle R-HSA-162587	2/149	0.00407472	0.0465895	0	0	24.5393	135.038	XRCC6;NMT1
210	Adherens Junction (GO:0005912)	2/150	0.00412827	0.0129352	0	0	24.3722	133.801	DSP;JUP
18	DNA Ligation (GO:0006266)	1/7	0.00454175	0.0421608	0	0	277.514	1497.03	XRCC6
19	Positive Regulation Of Leukocyte Differentiation (GO:1902107)	1/7	0.00454175	0.0421608	0	0	277.514	1497.03	XRCC6
20	Regulation Of Extent Of Cell Growth (GO:0061387)	1/7	0.00454175	0.0421608	0	0	277.514	1497.03	DNM2
21	Negative Regulation Of Peptidyl-Lysine Acetylation (GO:2000757)	1/7	0.00454175	0.0421608	0	0	277.514	1497.03	SET
22	Positive Regulation Of Nucleic Acid-Templated Transcription (GO:1903508)	3/557	0.00498823	0.0421608	0	0	10.5233	55.7805	XRCC6;NCOA6;DNM2
23	Regulation Of Rhodopsin Mediated Signaling Pathway (GO:0022400)	1/8	0.00518902	0.0421608	0	0	237.857	1251.42	NMT1
24	Cellular Response To Muramyl Dipeptide (GO:0071225)	1/8	0.00518902	0.0421608	0	0	237.857	1251.42	VIM
245	Double-Stranded Telomeric DNA Binding (GO:0003691)	1/8	0.00518902	0.0713064	0	0	237.857	1251.42	XRCC6
313	2-LTR Circle Formation R-HSA-164843	1/8	0.00518902	0.0465895	0	0	237.857	1251.42	XRCC6
25	Transferrin Transport (GO:0033572)	1/9	0.0058359	0.04552	0	0	208.115	1070.48	DNM2
314	Formation Of Annular Gap Junctions R-HSA-196025	1/9	0.0058359	0.0465895	0	0	208.115	1070.48	DNM2
211	Intracellular Non-Membrane-Bounded Organelle (GO:0043232)	4/1195	0.00586691	0.016888	0	0	7.01409	36.0414	XRCC6;SET;JUP;VIM
212	Cytoskeleton (GO:0005856)	3/599	0.00610843	0.016888	0	0	9.76057	49.7602	ABLIM1;JUP;VIM
26	Synaptic Vesicle Transport (GO:0048489)	1/10	0.0064824	0.0468173	0	0	184.981	932.06	DNM2
27	Positive Regulation Of Mitochondrial Outer Membrane Permeabilization Involved In Apoptotic Signaling Pathway (GO:1901030)	1/10	0.0064824	0.0468173	0	0	184.981	932.06	NMT1
246	Nuclear Retinoid X Receptor Binding (GO:0046965)	1/10	0.0064824	0.0713064	0	0	184.981	932.06	NCOA6
315	Gap Junction Degradation R-HSA-190873	1/10	0.0064824	0.0465895	0	0	184.981	932.06	DNM2
316	HuR (ELAVL1) Binds And Stabilizes mRNA R-HSA-450520	1/10	0.0064824	0.0465895	0	0	184.981	932.06	SET
317	Integration Of Provirus R-HSA-162592	1/10	0.0064824	0.0465895	0	0	184.981	932.06	XRCC6
28	Positive Regulation Of DNA-templated Transcription (GO:0045893)	4/1243	0.0067478	0.0469936	0	0	6.72514	33.6159	XRCC6;JUP;NCOA6;DNM2
213	Intracellular Membrane-Bounded Organelle (GO:0043231)	8/5175	0.00706412	0.0176337	0	0	4.58912	22.7287	DSP;FAM83G;XRCC6;SET;JUP;NCOA6;DSG2;TPT1
214	MLL3/4 Complex (GO:0044666)	1/11	0.0071285	0.0176337	0	0	166.475	822.995	NCOA6
318	Apoptotic Cleavage Of Cell Adhesion Proteins R-HSA-351906	1/11	0.0071285	0.0465895	0	0	166.475	822.995	DSG2
319	Signaling By Rho GTPases R-HSA-194315	3/644	0.00746562	0.0465895	0	0	9.05429	44.3429	JUP;DSG2;VIM
29	Response To Muramyl Dipeptide (GO:0032495)	1/12	0.00777422	0.0522749	0	0	151.333	735.017	VIM
320	Caspase-mediated Cleavage Of Cytoskeletal Proteins R-HSA-264870	1/12	0.00777422	0.0465895	0	0	151.333	735.017	VIM
321	Keratinization R-HSA-6805567	2/208	0.00778577	0.0465895	0	0	17.459	84.7712	JUP;DSG2
322	Signaling By Rho GTPases, Miro GTPases And RHOBTB3 R-HSA-9716542	3/660	0.0079884	0.0465895	0	0	8.82648	42.6298	JUP;DSG2;VIM
30	Synaptic Vesicle Localization (GO:0097479)	1/13	0.00841955	0.0547271	0	0	138.715	662.671	DNM2
288	Non-homologous end-joining	1/13	0.00841955	0.0715661	0	0	138.715	662.671	XRCC6
323	IRF3-mediated Induction Of Type I IFN R-HSA-3270619	1/13	0.00841955	0.0465895	0	0	138.715	662.671	XRCC6
324	DCC Mediated Attractive Signaling R-HSA-418885	1/14	0.00906449	0.0465895	0	0	128.038	602.215	ABLIM1
325	Retrograde Neurotrophin Signaling R-HSA-177504	1/14	0.00906449	0.0465895	0	0	128.038	602.215	DNM2
326	HIV Infection R-HSA-162906	2/229	0.00936916	0.0465895	0	0	15.827	73.9173	XRCC6;NMT1
31	Protein Localization To Cell-Cell Junction (GO:0150105)	1/15	0.00970904	0.0573716	0	0	118.887	551.005	DSP
32	Regulation Of Intrinsic Apoptotic Signaling Pathway In Response To DNA Damage (GO:1902229)	1/15	0.00970904	0.0573716	0	0	118.887	551.005	TPT1
33	Positive Regulation Of Collagen Biosynthetic Process (GO:0032967)	1/15	0.00970904	0.0573716	0	0	118.887	551.005	VIM
327	Metabolism Of Nitric Oxide: NOS3 Activation And Regulation R-HSA-202131	1/15	0.00970904	0.0465895	0	0	118.887	551.005	DNM2
34	Cellular Response To Gamma Radiation (GO:0071480)	1/16	0.0103532	0.0576822	0	0	110.956	507.118	XRCC6
35	Positive Regulation Of Collagen Metabolic Process (GO:0010714)	1/16	0.0103532	0.0576822	0	0	110.956	507.118	VIM
328	STING Mediated Induction Of Host Immune Responses R-HSA-1834941	1/16	0.0103532	0.0465895	0	0	110.956	507.118	XRCC6
329	Early Phase Of HIV Life Cycle R-HSA-162594	1/16	0.0103532	0.0465895	0	0	110.956	507.118	XRCC6
247	RNA Binding (GO:0003723)	4/1411	0.0105308	0.074774	0	0	5.86907	26.7245	DSP;XRCC6;VIM;TPT1
248	Nuclear Retinoic Acid Receptor Binding (GO:0042974)	1/17	0.010997	0.074774	0	0	104.016	469.124	NCOA6
36	Regulation Of Collagen Biosynthetic Process (GO:0032965)	1/18	0.0116404	0.0582019	0	0	97.8922	435.941	VIM
37	Establishment Of Vesicle Localization (GO:0051650)	1/18	0.0116404	0.0582019	0	0	97.8922	435.941	DNM2
38	Detection Of Mechanical Stimulus (GO:0050982)	1/18	0.0116404	0.0582019	0	0	97.8922	435.941	JUP
39	Nucleosome Disassembly (GO:0006337)	1/18	0.0116404	0.0582019	0	0	97.8922	435.941	SET
330	RORA Activates Gene Expression R-HSA-1368082	1/18	0.0116404	0.0504417	0	0	97.8922	435.941	NCOA6
40	Regulation Of Lymphocyte Differentiation (GO:0045619)	1/19	0.0122834	0.0598816	0	0	92.4491	406.73	XRCC6
41	protein-DNA Complex Disassembly (GO:0032986)	1/20	0.012926	0.0614774	0	0	87.5789	380.838	SET
215	Nucleus (GO:0005634)	7/4487	0.0134011	0.0314926	0	0	4.03828	17.4148	DSP;FAM83G;XRCC6;SET;JUP;NCOA6;TPT1
42	Regulation Of Histone Acetylation (GO:0035065)	1/22	0.0142101	0.0643298	0	0	79.2302	337.029	SET
43	Response To Gamma Radiation (GO:0010332)	1/22	0.0142101	0.0643298	0	0	79.2302	337.029	XRCC6
249	Phosphatase Inhibitor Activity (GO:0019212)	1/22	0.0142101	0.074774	0	0	79.2302	337.029	SET
44	DNA Metabolic Process (GO:0006259)	2/288	0.0145154	0.0643298	0	0	12.5245	53.0104	XRCC6;SET
45	Protein Localization To Cell Junction (GO:1902414)	1/23	0.0148516	0.0643568	0	0	75.625	318.355	DSP
331	RHOBTB1 GTPase Cycle R-HSA-9013422	1/23	0.0148516	0.0620584	0	0	75.625	318.355	VIM
46	Iron Ion Transport (GO:0006826)	1/24	0.0154927	0.0650892	0	0	72.3333	301.441	DNM2
47	Negative Regulation Of Intrinsic Apoptotic Signaling Pathway In Response To DNA Damage (GO:1902230)	1/25	0.0161334	0.0650892	0	0	69.316	286.058	TPT1
48	Ventricular Cardiac Muscle Tissue Development (GO:0003229)	1/25	0.0161334	0.0650892	0	0	69.316	286.058	DSG2
332	Gap Junction Trafficking R-HSA-190828	1/25	0.0161334	0.0636684	0	0	69.316	286.058	DNM2
49	Histone H3-K4 Methylation (GO:0051568)	1/26	0.0167737	0.0650892	0	0	66.54	272.012	NCOA6
50	Antigen Processing And Presentation Of Exogenous Peptide Antigen Via MHC Class II (GO:0019886)	1/26	0.0167737	0.0650892	0	0	66.54	272.012	DNM2
51	Supramolecular Fiber Organization (GO:0097435)	2/316	0.0173024	0.0650892	0	0	11.3914	46.214	DSP;VIM
216	Secretory Granule Lumen (GO:0034774)	2/316	0.0173024	0.038568	0	0	11.3914	46.214	XRCC6;JUP
52	Peptide Cross-Linking (GO:0018149)	1/27	0.0174136	0.0650892	0	0	63.9776	259.141	DSP
250	Protein Phosphatase Inhibitor Activity (GO:0004864)	1/27	0.0174136	0.074774	0	0	63.9776	259.141	SET
251	Nuclear Thyroid Hormone Receptor Binding (GO:0046966)	1/27	0.0174136	0.074774	0	0	63.9776	259.141	NCOA6
333	Gap Junction Trafficking And Regulation R-HSA-157858	1/27	0.0174136	0.0636684	0	0	63.9776	259.141	DNM2
334	BMAL1:CLOCK,NPAS2 Activates Circadian Gene Expression R-HSA-1368108	1/27	0.0174136	0.0636684	0	0	63.9776	259.141	NCOA6
335	VEGFR2 Mediated Vascular Permeability R-HSA-5218920	1/27	0.0174136	0.0636684	0	0	63.9776	259.141	JUP
53	Positive Regulation Of Protein Import Into Nucleus (GO:0042307)	1/28	0.0180531	0.0650892	0	0	61.6049	247.309	JUP
54	Antigen Processing And Presentation Of Peptide Antigen Via MHC Class II (GO:0002495)	1/28	0.0180531	0.0650892	0	0	61.6049	247.309	DNM2
217	Catenin Complex (GO:0016342)	1/28	0.0180531	0.038568	0	0	61.6049	247.309	JUP
336	Recycling Pathway Of L1 R-HSA-437239	1/28	0.0180531	0.0640066	0	0	61.6049	247.309	DNM2
55	Regulation Of Developmental Growth (GO:0048638)	1/29	0.0186923	0.0650892	0	0	59.4018	236.398	DNM2
56	RNA Biosynthetic Process (GO:0032774)	1/29	0.0186923	0.0650892	0	0	59.4018	236.398	NCOA6
337	Adherens Junctions Interactions R-HSA-418990	1/29	0.0186923	0.0643235	0	0	59.4018	236.398	JUP
57	Antigen Processing And Presentation Of Exogenous Peptide Antigen (GO:0002478)	1/31	0.0199695	0.0657586	0	0	55.4361	216.952	DNM2
58	Presynaptic Endocytosis (GO:0140238)	1/31	0.0199695	0.0657586	0	0	55.4361	216.952	DNM2
252	Calcium Ion Binding (GO:0005509)	2/346	0.020523	0.074774	0	0	10.3821	40.3471	DSG2;TPT1
59	Histone Lysine Methylation (GO:0034968)	1/32	0.0206075	0.0657586	0	0	53.6452	208.256	NCOA6
338	Inactivation, Recovery And Regulation Of Phototransduction Cascade R-HSA-2514859	1/32	0.0206075	0.0671804	0	0	53.6452	208.256	NMT1
60	Positive Regulation Of Transcription By RNA Polymerase II (GO:0045944)	3/938	0.0206658	0.0657586	0	0	6.11294	23.7138	XRCC6;JUP;NCOA6
61	Ventricular Cardiac Muscle Tissue Morphogenesis (GO:0055010)	1/33	0.0212451	0.0657586	0	0	51.9661	200.154	DSP
62	Negative Regulation Of Blood Vessel Endothelial Cell Migration (GO:0043537)	1/33	0.0212451	0.0657586	0	0	51.9661	200.154	JUP
63	Positive Regulation Of Establishment Of Protein Localization To Mitochondrion (GO:1903749)	1/33	0.0212451	0.0657586	0	0	51.9661	200.154	NMT1
253	Telomeric DNA Binding (GO:0042162)	1/33	0.0212451	0.074774	0	0	51.9661	200.154	XRCC6
339	Striated Muscle Contraction R-HSA-390522	1/33	0.0212451	0.0671804	0	0	51.9661	200.154	VIM
340	Phototransduction Cascade R-HSA-2514856	1/33	0.0212451	0.0671804	0	0	51.9661	200.154	NMT1
254	Nuclear Estrogen Receptor Binding (GO:0030331)	1/34	0.0218823	0.074774	0	0	50.3889	192.59	NCOA6
341	Lysosome Vesicle Biogenesis R-HSA-432720	1/34	0.0218823	0.0673745	0	0	50.3889	192.59	DNM2
64	Regulation Of Axon Extension (GO:0030516)	1/35	0.0225192	0.0686131	0	0	48.9044	185.513	DNM2
342	RHOBTB GTPase Cycle R-HSA-9706574	1/35	0.0225192	0.0675575	0	0	48.9044	185.513	VIM
255	Protein Kinase C Binding (GO:0005080)	1/36	0.0231556	0.074774	0	0	47.5048	178.88	DSP
343	RHOH GTPase Cycle R-HSA-9013407	1/36	0.0231556	0.0677303	0	0	47.5048	178.88	JUP
65	Negative Regulation Of Endothelial Cell Migration (GO:0010596)	1/37	0.0237917	0.0710948	0	0	46.1829	172.651	JUP
256	N-acyltransferase Activity (GO:0016410)	1/37	0.0237917	0.074774	0	0	46.1829	172.651	NMT1
66	Regulation Of Protein Import Into Nucleus (GO:0042306)	1/38	0.0244274	0.0710948	0	0	44.9324	166.791	JUP
67	G2/M Transition Of Mitotic Cell Cycle (GO:0000086)	1/38	0.0244274	0.0710948	0	0	44.9324	166.791	DNM2
68	Positive Regulation Of Lymphocyte Differentiation (GO:0045621)	1/39	0.0250628	0.0715009	0	0	43.7478	161.271	XRCC6
344	NGF-stimulated Transcription R-HSA-9031628	1/39	0.0250628	0.0715206	0	0	43.7478	161.271	DNM2
69	Cell Cycle G2/M Phase Transition (GO:0044839)	1/40	0.0256977	0.0715009	0	0	42.6239	156.061	DNM2
70	Synaptic Vesicle Endocytosis (GO:0048488)	1/40	0.0256977	0.0715009	0	0	42.6239	156.061	DNM2
71	Double-Strand Break Repair Via Nonhomologous End Joining (GO:0006303)	1/41	0.0263323	0.0715009	0	0	41.5562	151.138	XRCC6
345	Innate Immune System R-HSA-168249	3/1035	0.0267666	0.0733739	0	0	5.51017	19.9501	XRCC6;JUP;DNM2
72	DNA Recombination (GO:0006310)	1/42	0.0269665	0.0715009	0	0	40.5407	146.48	XRCC6
73	Keratinocyte Differentiation (GO:0030216)	1/42	0.0269665	0.0715009	0	0	40.5407	146.48	DSP
346	Activation Of Gene Expression By SREBF (SREBP) R-HSA-2426168	1/42	0.0269665	0.0733739	0	0	40.5407	146.48	NCOA6
74	Positive Regulation Of Cell-Matrix Adhesion (GO:0001954)	1/43	0.0276003	0.0715009	0	0	39.5734	142.066	JUP
347	Condensation Of Prophase Chromosomes R-HSA-2299718	1/43	0.0276003	0.0733916	0	0	39.5734	142.066	SET
75	Synaptic Vesicle Recycling (GO:0036465)	1/44	0.0282337	0.0715009	0	0	38.6512	137.878	DNM2
76	Positive Regulation Of Nucleocytoplasmic Transport (GO:0046824)	1/44	0.0282337	0.0715009	0	0	38.6512	137.878	JUP
77	Positive Regulation Of Biosynthetic Process (GO:0009891)	1/44	0.0282337	0.0715009	0	0	38.6512	137.878	VIM
348	TBC/RABGAPs R-HSA-8854214	1/45	0.0288667	0.0734219	0	0	37.7708	133.9	TBC1D15
349	Heme Signaling R-HSA-9707616	1/45	0.0288667	0.0734219	0	0	37.7708	133.9	NCOA6
78	Regulation Of mRNA Catabolic Process (GO:0061013)	1/46	0.0294994	0.0734459	0	0	36.9296	130.117	VIM
79	Regulation Of DNA-templated Transcription (GO:0006355)	4/1922	0.0299595	0.0734459	0	0	4.187	14.6876	XRCC6;SET;NCOA6;DNM2
80	Positive Regulation Of Lymphocyte Activation (GO:0051251)	1/47	0.0301317	0.0734459	0	0	36.125	126.516	XRCC6
350	Immune System R-HSA-168256	4/1943	0.0310443	0.0761201	0	0	4.13684	14.3645	XRCC6;JUP;VIM;DNM2
351	Netrin-1 Signaling R-HSA-373752	1/49	0.0313951	0.0761201	0	0	34.6163	119.811	ABLIM1
81	Plasma Membrane Bounded Cell Projection Morphogenesis (GO:0120039)	1/50	0.0320262	0.0765529	0	0	33.9082	116.685	DNM2
218	Multivesicular Body (GO:0005771)	1/50	0.0320262	0.0654449	0	0	33.9082	116.685	TPT1
257	Nuclear Receptor Coactivator Activity (GO:0030374)	1/50	0.0320262	0.0915525	0	0	33.9082	116.685	NCOA6
82	Receptor Internalization (GO:0031623)	1/51	0.032657	0.0765529	0	0	33.2283	113.697	DNM2
352	Nonhomologous End-Joining (NHEJ) R-HSA-5693571	1/51	0.032657	0.0761201	0	0	33.2283	113.697	XRCC6
83	Cellular Response To Ionizing Radiation (GO:0071479)	1/52	0.0332873	0.0765529	0	0	32.5752	110.84	XRCC6
353	Transcriptional Activation Of Mitochondrial Biogenesis R-HSA-2151201	1/52	0.0332873	0.0761201	0	0	32.5752	110.84	NCOA6
84	Cellular Response To Alcohol (GO:0097306)	1/53	0.0339173	0.0765529	0	0	31.9471	108.104	JUP
289	Endocrine and other factor-regulated calcium reabsorption	1/53	0.0339173	0.120323	0	0	31.9471	108.104	DNM2
85	Negative Regulation Of Nucleic Acid-Templated Transcription (GO:1903507)	2/456	0.0342667	0.0765529	0	0	7.82259	26.3901	XRCC6;SET
86	Epidermal Cell Differentiation (GO:0009913)	1/54	0.034547	0.0765529	0	0	31.3428	105.482	DSP
87	Regulation Of Smooth Muscle Cell Proliferation (GO:0048660)	1/54	0.034547	0.0765529	0	0	31.3428	105.482	XRCC6
88	Regulation Of Blood Vessel Endothelial Cell Migration (GO:0043535)	1/54	0.034547	0.0765529	0	0	31.3428	105.482	JUP
354	RHOJ GTPase Cycle R-HSA-9013409	1/54	0.034547	0.0761201	0	0	31.3428	105.482	JUP
355	Intrinsic Pathway For Apoptosis R-HSA-109606	1/55	0.0351762	0.0761201	0	0	30.7608	102.968	NMT1
356	Regulation Of Cholesterol Biosynthesis By SREBP (SREBF) R-HSA-1655829	1/55	0.0351762	0.0761201	0	0	30.7608	102.968	NCOA6
357	Golgi Associated Vesicle Biogenesis R-HSA-432722	1/55	0.0351762	0.0761201	0	0	30.7608	102.968	DNM2
89	Cellular Response To Peptide (GO:1901653)	1/56	0.0358051	0.0775777	0	0	30.2	100.556	VIM
90	post-Golgi Vesicle-Mediated Transport (GO:0006892)	1/56	0.0358051	0.0775777	0	0	30.2	100.556	DNM2
358	Neutrophil Degranulation R-HSA-6798695	2/468	0.0359382	0.0761201	0	0	7.61647	25.332	XRCC6;JUP
91	Myeloid Cell Differentiation (GO:0030099)	1/57	0.0364336	0.0780719	0	0	29.6592	98.2392	NCOA6
359	Cytoprotection By HMOX1 R-HSA-9707564	1/57	0.0364336	0.0761201	0	0	29.6592	98.2392	NCOA6
92	DNA-templated Transcription Initiation (GO:0006352)	1/59	0.0376894	0.0791044	0	0	28.6336	93.8718	NCOA6
258	SH3 Domain Binding (GO:0017124)	1/59	0.0376894	0.0915525	0	0	28.6336	93.8718	DNM2
360	RHOQ GTPase Cycle R-HSA-9013406	1/59	0.0376894	0.0770983	0	0	28.6336	93.8718	JUP
93	Negative Regulation Of Apoptotic Process (GO:0043066)	2/482	0.0379286	0.0791044	0	0	7.38902	24.1772	SET;TPT1
94	Homophilic Cell Adhesion Via Plasma Membrane Adhesion Molecules (GO:0007156)	1/60	0.0383167	0.0791044	0	0	28.1469	91.8115	DSG2
219	Ficolin-1-Rich Granule Membrane (GO:0101003)	1/60	0.0383167	0.0732142	0	0	28.1469	91.8115	DSP
95	BMP Signaling Pathway (GO:0030509)	1/61	0.0389437	0.0791044	0	0	27.6764	89.8275	FAM83G
96	Negative Regulation Of Intrinsic Apoptotic Signaling Pathway (GO:2001243)	1/61	0.0389437	0.0791044	0	0	27.6764	89.8275	TPT1
220	Specific Granule Lumen (GO:0035580)	1/61	0.0389437	0.0732142	0	0	27.6764	89.8275	JUP
259	Protein Phosphatase Regulator Activity (GO:0019888)	1/61	0.0389437	0.0915525	0	0	27.6764	89.8275	SET
361	Cell-cell Junction Organization R-HSA-421270	1/61	0.0389437	0.0770983	0	0	27.6764	89.8275	JUP
362	Nuclear Events (Kinase And Transcription Factor Activation) R-HSA-198725	1/61	0.0389437	0.0770983	0	0	27.6764	89.8275	DNM2
363	Signaling By Receptor Tyrosine Kinases R-HSA-9006934	2/496	0.0399616	0.0770983	0	0	7.17446	23.1006	JUP;DNM2
97	Telomere Organization (GO:0032200)	1/63	0.0401965	0.0808075	0	0	26.7809	86.0732	XRCC6
364	Cytosolic Sensors Of Pathogen-Associated DNA R-HSA-1834949	1/63	0.0401965	0.0770983	0	0	26.7809	86.0732	XRCC6
260	Acyltransferase Activity, Transferring Groups Other Than Amino-Acyl Groups (GO:0016747)	1/64	0.0408224	0.0915525	0	0	26.3545	84.2955	NMT1
98	Canonical Wnt Signaling Pathway (GO:0060070)	1/65	0.0414478	0.0816397	0	0	25.9414	82.5798	JUP
99	Regulation Of Cell-Matrix Adhesion (GO:0001952)	1/65	0.0414478	0.0816397	0	0	25.9414	82.5798	JUP
261	Double-Stranded RNA Binding (GO:0003725)	1/65	0.0414478	0.0915525	0	0	25.9414	82.5798	VIM
100	Cellular Response To BMP Stimulus (GO:0071773)	1/66	0.0420729	0.0820422	0	0	25.541	80.9229	FAM83G
262	Protein Kinase Binding (GO:0019901)	2/511	0.0421862	0.0915525	0	0	6.95767	22.0256	DSP;FAM83G
290	Acute myeloid leukemia	1/67	0.0426976	0.120323	0	0	25.1528	79.3221	JUP
101	Telomere Maintenance (GO:0000723)	1/68	0.043322	0.0822828	0	0	24.7761	77.7746	XRCC6
102	Skin Development (GO:0043588)	1/68	0.043322	0.0822828	0	0	24.7761	77.7746	DSP
291	Mitophagy	1/68	0.043322	0.120323	0	0	24.7761	77.7746	TBC1D15
365	Axon Guidance R-HSA-422475	2/519	0.043392	0.0803387	0	0	6.8472	21.4829	ABLIM1;DNM2
263	Metal Ion Binding (GO:0046872)	2/521	0.0436955	0.0915525	0	0	6.82011	21.3504	DSG2;TPT1
366	Circadian Clock R-HSA-400253	1/69	0.0439459	0.0803387	0	0	24.4105	76.2779	NCOA6
367	RHOB GTPase Cycle R-HSA-9013026	1/69	0.0439459	0.0803387	0	0	24.4105	76.2779	JUP
103	Regulation Of G Protein-Coupled Receptor Signaling Pathway (GO:0008277)	1/70	0.0445695	0.0822828	0	0	24.0556	74.8297	NMT1
104	Regulation Of Cilium Assembly (GO:1902017)	1/71	0.0451927	0.0822828	0	0	23.7107	73.4278	TBC1D15
105	Cell-Cell Junction Assembly (GO:0007043)	1/71	0.0451927	0.0822828	0	0	23.7107	73.4278	JUP
106	Regulation Of Hydrolase Activity (GO:0051336)	1/71	0.0451927	0.0822828	0	0	23.7107	73.4278	TBC1D15
107	Positive Regulation Of Cell-Substrate Adhesion (GO:0010811)	1/71	0.0451927	0.0822828	0	0	23.7107	73.4278	JUP
368	trans-Golgi Network Vesicle Budding R-HSA-199992	1/71	0.0451927	0.0813469	0	0	23.7107	73.4278	DNM2
108	Positive Regulation Of Protein Localization To Nucleus (GO:1900182)	1/72	0.0458156	0.0822828	0	0	23.3756	72.07	JUP
109	DNA Replication (GO:0006260)	1/73	0.046438	0.0822828	0	0	23.0498	70.7544	SET
369	RHOC GTPase Cycle R-HSA-9013106	1/73	0.046438	0.081558	0	0	23.0498	70.7544	JUP
110	Negative Regulation Of Neuron Apoptotic Process (GO:0043524)	1/74	0.0470601	0.0822828	0	0	22.7329	69.4792	SET
111	Regulation Of mRNA Stability (GO:0043488)	1/74	0.0470601	0.0822828	0	0	22.7329	69.4792	VIM
370	RHOG GTPase Cycle R-HSA-9013408	1/74	0.0470601	0.081558	0	0	22.7329	69.4792	DSG2
371	Nervous System Development R-HSA-9675108	2/545	0.0474013	0.081558	0	0	6.51063	19.8516	ABLIM1;DNM2
112	Regulation Of Plasma Membrane Bounded Cell Projection Assembly (GO:0120032)	1/75	0.0476818	0.0822828	0	0	22.4245	68.2425	TBC1D15
113	Nucleosome Organization (GO:0034728)	1/75	0.0476818	0.0822828	0	0	22.4245	68.2425	SET
114	Wnt Signaling Pathway (GO:0016055)	1/76	0.0483032	0.0826238	0	0	22.1244	67.0428	JUP
292	Bacterial invasion of epithelial cells	1/77	0.0489241	0.120323	0	0	21.8322	65.8784	DNM2
293	Synaptic vesicle cycle	1/78	0.0495447	0.120323	0	0	21.5476	64.748	DNM2
115	Positive Regulation Of Protein Localization To Membrane (GO:1905477)	1/79	0.0501649	0.083924	0	0	21.2703	63.6501	NMT1
116	Negative Regulation Of Cellular Component Organization (GO:0051129)	1/79	0.0501649	0.083924	0	0	21.2703	63.6501	DNM2
117	Wound Healing (GO:0042060)	1/80	0.0507848	0.083924	0	0	21	62.5833	DSP
118	Regulation Of Organelle Assembly (GO:1902115)	1/80	0.0507848	0.083924	0	0	21	62.5833	TBC1D15
221	Lipid Droplet (GO:0005811)	1/82	0.0520233	0.0940421	0	0	20.4794	60.5385	SET
372	Transcriptional Regulation Of White Adipocyte Differentiation R-HSA-381340	1/84	0.0532604	0.0890884	0	0	19.9839	58.6041	NCOA6
119	Epidermis Development (GO:0008544)	1/85	0.0538784	0.0868288	0	0	19.745	57.6758	DSP
120	Positive Regulation Of Amide Metabolic Process (GO:0034250)	1/85	0.0538784	0.0868288	0	0	19.745	57.6758	VIM
121	Positive Regulation Of Canonical Wnt Signaling Pathway (GO:0090263)	1/85	0.0538784	0.0868288	0	0	19.745	57.6758	JUP
373	Cell Junction Organization R-HSA-446728	1/86	0.054496	0.0890884	0	0	19.5118	56.772	JUP
374	RAC2 GTPase Cycle R-HSA-9013404	1/87	0.0551132	0.0890884	0	0	19.2839	55.8918	DSG2
122	Negative Regulation Of Neuron Death (GO:1901215)	1/88	0.05573	0.0890767	0	0	19.0613	55.0345	SET
375	Regulation Of mRNA Stability By Proteins That Bind AU-rich Elements R-HSA-450531	1/88	0.05573	0.0890884	0	0	19.0613	55.0345	SET
376	Membrane Trafficking R-HSA-199991	2/599	0.0561532	0.0890884	0	0	5.90528	17.0053	TBC1D15;DNM2
377	Mitochondrial Biogenesis R-HSA-1592230	1/89	0.0563465	0.0890884	0	0	18.8438	54.199	NCOA6
378	Activation Of HOX Genes During Differentiation R-HSA-5619507	1/91	0.0575784	0.0893588	0	0	18.4231	52.5909	NCOA6
379	RAC3 GTPase Cycle R-HSA-9013423	1/93	0.0588088	0.0893588	0	0	18.0208	51.0614	DSG2
380	VEGFA-VEGFR2 Pathway R-HSA-4420097	1/93	0.0588088	0.0893588	0	0	18.0208	51.0614	JUP
123	Recombinational Repair (GO:0000725)	1/95	0.0600377	0.0951817	0	0	17.6356	49.6052	XRCC6
294	Fc gamma R-mediated phagocytosis	1/97	0.0612651	0.130188	0	0	17.2665	48.2175	DNM2
381	Visual Phototransduction R-HSA-2187338	1/98	0.0618782	0.0916068	0	0	17.0876	47.5478	NMT1
382	L1CAM Interactions R-HSA-373760	1/99	0.062491	0.0916068	0	0	16.9124	46.8936	DNM2
383	Vesicle-mediated Transport R-HSA-5653656	2/637	0.0626371	0.0916068	0	0	5.54102	15.3508	TBC1D15;DNM2
124	Hemopoiesis (GO:0030097)	1/101	0.0637155	0.0992399	0	0	16.5725	45.6295	NCOA6
125	Calcium Ion Homeostasis (GO:0055074)	1/102	0.0643271	0.0992399	0	0	16.4076	45.0187	TPT1
126	Activation Of GTPase Activity (GO:0090630)	1/102	0.0643271	0.0992399	0	0	16.4076	45.0187	TBC1D15
384	Signaling By VEGF R-HSA-194138	1/102	0.0643271	0.092917	0	0	16.4076	45.0187	JUP
127	Positive Regulation Of Kinase Activity (GO:0033674)	1/104	0.0655494	0.0992399	0	0	16.0874	43.8373	XRCC6
128	Positive Regulation Of Vasculature Development (GO:1904018)	1/104	0.0655494	0.0992399	0	0	16.0874	43.8373	JUP
385	MHC Class II Antigen Presentation R-HSA-2132295	1/104	0.0655494	0.0930257	0	0	16.0874	43.8373	DNM2
386	Signal Transduction R-HSA-162582	4/2465	0.0659926	0.0930257	0	0	3.16511	8.60344	JUP;DSG2;VIM;DNM2
129	Cellular Response To Organonitrogen Compound (GO:0071417)	1/105	0.0661599	0.0992399	0	0	15.9319	43.2659	JUP
130	Regulation Of Neuron Apoptotic Process (GO:0043523)	1/105	0.0661599	0.0992399	0	0	15.9319	43.2659	SET
222	Apical Junction Complex (GO:0043296)	1/106	0.0667701	0.116229	0	0	15.7794	42.7068	JUP
387	Interleukin-4 And Interleukin-13 Signaling R-HSA-6785807	1/107	0.06738	0.0938507	0	0	15.6297	42.1597	VIM
131	Positive Regulation Of Translation (GO:0045727)	1/108	0.0679894	0.101206	0	0	15.4829	41.6242	VIM
132	Positive Regulation Of Wnt Signaling Pathway (GO:0030177)	1/109	0.0685985	0.101339	0	0	15.3387	41.0999	JUP
133	Mitotic Cell Cycle Phase Transition (GO:0044772)	1/111	0.0698156	0.102361	0	0	15.0583	40.0837	DNM2
134	Calcium Ion Transport (GO:0006816)	1/112	0.0704236	0.102482	0	0	14.9219	39.5912	TPT1
264	Phosphatase Binding (GO:0019902)	1/112	0.0704236	0.13245	0	0	14.9219	39.5912	JUP
388	Mitotic Prophase R-HSA-68875	1/112	0.0704236	0.096936	0	0	14.9219	39.5912	SET
389	Signaling By NTRK1 (TRKA) R-HSA-187037	1/114	0.0716385	0.0974617	0	0	14.6563	38.6359	DNM2
223	Cytoplasmic Vesicle Lumen (GO:0060205)	1/115	0.0722454	0.121269	0	0	14.527	38.1725	XRCC6
265	Protein Phosphatase Binding (GO:0019903)	1/115	0.0722454	0.13245	0	0	14.527	38.1725	JUP
266	Nuclear Receptor Binding (GO:0016922)	1/115	0.0722454	0.13245	0	0	14.527	38.1725	NCOA6
390	PPARA Activates Gene Expression R-HSA-1989781	1/116	0.0728519	0.0979732	0	0	14.4	37.7183	NCOA6
135	Cellular Response To Molecule Of Bacterial Origin (GO:0071219)	1/117	0.0734581	0.10578	0	0	14.2751	37.273	VIM
391	Regulation Of Lipid Metabolism By PPARalpha R-HSA-400206	1/118	0.0740639	0.0984713	0	0	14.1524	36.8363	NCOA6
136	Regulation Of Protein Kinase Activity (GO:0045859)	1/119	0.0746693	0.10578	0	0	14.0318	36.4081	XRCC6
137	Positive Regulation Of Angiogenesis (GO:0045766)	1/119	0.0746693	0.10578	0	0	14.0318	36.4081	JUP
138	Regulation Of Apoptotic Process (GO:0042981)	2/705	0.0748597	0.10578	0	0	4.98746	12.9282	TPT1;DNM2
392	Cell-Cell Communication R-HSA-1500931	1/120	0.0752744	0.0989562	0	0	13.9132	35.988	JUP
139	Positive Regulation Of Macromolecule Biosynthetic Process (GO:0010557)	1/122	0.0764834	0.10653	0	0	13.6818	35.1716	VIM
140	Receptor-Mediated Endocytosis (GO:0006898)	1/122	0.0764834	0.10653	0	0	13.6818	35.1716	DNM2
393	Rab Regulation Of Trafficking R-HSA-9007101	1/122	0.0764834	0.0994284	0	0	13.6818	35.1716	TBC1D15
141	Cellular Response To Lipopolysaccharide (GO:0071222)	1/124	0.077691	0.107445	0	0	13.458	34.3854	VIM
224	Cytoplasmic Side Of Plasma Membrane (GO:0009898)	1/124	0.077691	0.125913	0	0	13.458	34.3854	JUP
142	Regulation Of Response To External Stimulus (GO:0032101)	1/127	0.0794996	0.109172	0	0	13.1356	33.2593	NMT1
225	Peroxisome (GO:0005777)	1/129	0.0807035	0.126436	0	0	12.929	32.542	VIM
143	Transmembrane Receptor Protein Serine/Threonine Kinase Signaling Pathway (GO:0007178)	1/130	0.0813049	0.11087	0	0	12.8282	32.1929	FAM83G
144	Circulatory System Development (GO:0072359)	1/132	0.0825067	0.111728	0	0	12.631	31.5129	NCOA6
394	Signaling By NTRKs R-HSA-166520	1/132	0.0825067	0.10608	0	0	12.631	31.5129	DNM2
395	Late Phase Of HIV Life Cycle R-HSA-162599	1/136	0.0849058	0.107978	0	0	12.2543	30.2218	NMT1
145	Protein Localization To Plasma Membrane (GO:0072659)	1/137	0.0855047	0.114989	0	0	12.1636	29.9125	JUP
146	Regulation Of Cell Population Proliferation (GO:0042127)	2/766	0.0864456	0.115012	0	0	4.57473	11.2	XRCC6;JUP
147	Intracellular Calcium Ion Homeostasis (GO:0006874)	1/139	0.0867014	0.115012	0	0	11.9861	29.3095	TPT1
396	Toll Like Receptor 4 (TLR4) Cascade R-HSA-166016	1/140	0.0872992	0.109828	0	0	11.8993	29.0154	DNM2
148	Protein Localization To Cell Periphery (GO:1990778)	1/142	0.0884937	0.116596	0	0	11.7293	28.4415	JUP
397	Clathrin-mediated Endocytosis R-HSA-8856828	1/142	0.0884937	0.110146	0	0	11.7293	28.4415	DNM2
149	Positive Regulation Of Protein Kinase Activity (GO:0045860)	1/145	0.0902828	0.118142	0	0	11.4832	27.6149	XRCC6
150	Neuron Projection Morphogenesis (GO:0048812)	1/146	0.0908784	0.118142	0	0	11.4034	27.3481	DNM2
398	RHOA GTPase Cycle R-HSA-8980692	1/147	0.0914737	0.111769	0	0	11.3248	27.0855	JUP
295	Phospholipase D signaling pathway	1/148	0.0920686	0.157527	0	0	11.2472	26.827	DNM2
296	Gastric cancer	1/149	0.0926632	0.157527	0	0	11.1706	26.5725	JUP
399	DNA Double-Strand Break Repair R-HSA-5693532	1/149	0.0926632	0.111769	0	0	11.1706	26.5725	XRCC6
400	CDC42 GTPase Cycle R-HSA-9013148	1/149	0.0926632	0.111769	0	0	11.1706	26.5725	JUP
151	Cellular Response To Organic Cyclic Compound (GO:0071407)	1/152	0.0944447	0.121965	0	0	10.947	25.8321	JUP
401	Metabolism Of Steroids R-HSA-8957322	1/153	0.0950378	0.113463	0	0	10.8745	25.5928	NCOA6
152	Response To Lipopolysaccharide (GO:0032496)	1/159	0.098589	0.126479	0	0	10.4583	24.2298	VIM
226	Endocytic Vesicle Membrane (GO:0030666)	1/159	0.098589	0.142937	0	0	10.4583	24.2298	DNM2
227	Specific Granule (GO:0042581)	1/159	0.098589	0.142937	0	0	10.4583	24.2298	JUP
228	Tertiary Granule (GO:0070820)	1/162	0.10036	0.142937	0	0	10.2619	23.5921	DSP
402	Toll-like Receptor Cascades R-HSA-168898	1/162	0.10036	0.118607	0	0	10.2619	23.5921	DNM2
153	Membrane Organization (GO:0061024)	1/167	0.103304	0.131118	0	0	9.9503	22.588	DNM2
154	Double-Strand Break Repair (GO:0006302)	1/168	0.103892	0.131118	0	0	9.89022	22.3955	XRCC6
155	Brain Development (GO:0007420)	1/169	0.104479	0.131118	0	0	9.83085	22.2056	NCOA6
229	Intracellular Organelle Lumen (GO:0070013)	2/856	0.104495	0.144449	0	0	4.07345	9.20036	XRCC6;JUP
156	Metal Ion Transport (GO:0030001)	1/171	0.105653	0.131118	0	0	9.71422	21.8336	TPT1
157	Heart Development (GO:0007507)	1/171	0.105653	0.131118	0	0	9.71422	21.8336	NCOA6
158	Cell-Cell Adhesion Via Plasma-Membrane Adhesion Molecules (GO:0098742)	1/172	0.106239	0.131118	0	0	9.65692	21.6514	DSG2
159	Positive Regulation Of Cellular Biosynthetic Process (GO:0031328)	1/174	0.107411	0.13173	0	0	9.54432	21.2943	VIM
297	Axon guidance	1/182	0.112083	0.161716	0	0	9.11878	19.9566	ABLIM1
403	Cellular Response To Chemical Stress R-HSA-9711123	1/182	0.112083	0.131137	0	0	9.11878	19.9566	NCOA6
267	Actin Binding (GO:0003779)	1/183	0.112665	0.198291	0	0	9.06822	19.7989	ABLIM1
230	Microtubule (GO:0005874)	1/185	0.113829	0.152856	0	0	8.96875	19.4896	DNM2
160	Endocytosis (GO:0006897)	1/189	0.116153	0.141036	0	0	8.77615	18.8937	DNM2
161	Intracellular Monoatomic Cation Homeostasis (GO:0030003)	1/190	0.116733	0.141036	0	0	8.72928	18.7493	TPT1
162	Protein Localization To Membrane (GO:0072657)	1/192	0.117892	0.141036	0	0	8.637	18.4658	JUP
163	Neuron Projection Development (GO:0031175)	1/192	0.117892	0.141036	0	0	8.637	18.4658	DNM2
298	Transcriptional misregulation in cancer	1/192	0.117892	0.161716	0	0	8.637	18.4658	JUP
164	Regulation Of Programmed Cell Death (GO:0043067)	1/195	0.119627	0.141883	0	0	8.50215	18.0532	TPT1
165	Positive Regulation Of Protein Metabolic Process (GO:0051247)	1/196	0.120205	0.141883	0	0	8.45812	17.919	VIM
231	Endocytic Vesicle (GO:0030139)	1/196	0.120205	0.155088	0	0	8.45812	17.919	DNM2
404	Muscle Contraction R-HSA-397014	1/196	0.120205	0.139248	0	0	8.45812	17.919	VIM
166	Golgi Vesicle Transport (GO:0048193)	1/197	0.120783	0.141883	0	0	8.41454	17.7863	DNM2
167	DNA-templated Transcription (GO:0006351)	1/199	0.121937	0.142381	0	0	8.3287	17.5257	NCOA6
168	Organic Substance Transport (GO:0071702)	1/201	0.123089	0.142691	0	0	8.24458	17.2711	TPT1
268	GTP Binding (GO:0005525)	1/201	0.123089	0.208305	0	0	8.24458	17.2711	DNM2
169	Regulation Of Translation (GO:0006417)	1/202	0.123665	0.142691	0	0	8.20315	17.146	VIM
299	Epstein-Barr virus infection	1/202	0.123665	0.161716	0	0	8.20315	17.146	VIM
170	Regulation Of Angiogenesis (GO:0045765)	1/205	0.12539	0.14383	0	0	8.08129	16.7794	JUP
232	Axon (GO:0030424)	1/205	0.12539	0.155088	0	0	8.08129	16.7794	VIM
233	Late Endosome (GO:0005770)	1/205	0.12539	0.155088	0	0	8.08129	16.7794	TPT1
171	Regulation Of Canonical Wnt Signaling Pathway (GO:0060828)	1/207	0.126539	0.144299	0	0	8.00202	16.5418	JUP
405	Infectious Disease R-HSA-5663205	2/961	0.126799	0.145446	0	0	3.60755	7.45014	XRCC6;NMT1
269	GTPase Activator Activity (GO:0005096)	1/211	0.128831	0.208438	0	0	7.84802	16.0825	TBC1D15
172	Regulation Of GTPase Activity (GO:0043087)	1/214	0.130547	0.148004	0	0	7.73631	15.7513	TBC1D15
270	Transcription Regulatory Region Nucleic Acid Binding (GO:0001067)	1/224	0.136244	0.208438	0	0	7.38565	14.7219	XRCC6
271	Guanyl Ribonucleotide Binding (GO:0032561)	1/226	0.13738	0.208438	0	0	7.31926	14.5288	DNM2
173	Regulation Of Transcription By RNA Polymerase II (GO:0006357)	3/2028	0.138037	0.154344	0	0	2.66104	5.26947	XRCC6;JUP;NCOA6
174	Cellular Response To Lipid (GO:0071396)	1/228	0.138513	0.154344	0	0	7.25404	14.3397	VIM
175	Cilium Organization (GO:0044782)	1/228	0.138513	0.154344	0	0	7.25404	14.3397	ABLIM1
176	Negative Regulation Of DNA-templated Transcription (GO:0045892)	2/1025	0.140955	0.156171	0	0	3.37048	6.60384	XRCC6;SET
177	Positive Regulation Of GTPase Activity (GO:0043547)	1/234	0.141907	0.156338	0	0	7.06509	13.7952	TBC1D15
272	Microtubule Binding (GO:0008017)	1/239	0.144725	0.212264	0	0	6.91492	13.366	DNM2
178	Cilium Assembly (GO:0060271)	1/243	0.146974	0.161011	0	0	6.79924	13.0376	ABLIM1
179	Positive Regulation Of Programmed Cell Death (GO:0043068)	1/245	0.148096	0.161045	0	0	6.74283	12.8781	DNM2
180	Positive Regulation Of DNA-binding Transcription Factor Activity (GO:0051091)	1/246	0.148657	0.161045	0	0	6.71497	12.7995	JUP
300	Salmonella infection	1/249	0.150336	0.172281	0	0	6.63273	12.5682	DNM2
301	Endocytosis	1/252	0.152013	0.172281	0	0	6.55246	12.3434	DNM2
273	GTPase Activity (GO:0003924)	1/265	0.159244	0.222763	0	0	6.22569	11.4386	DNM2
181	Positive Regulation Of Apoptotic Process (GO:0043065)	1/270	0.162009	0.17454	0	0	6.10843	11.118	DNM2
274	Ribonucleoside Triphosphate Phosphatase Activity (GO:0017111)	1/270	0.162009	0.222763	0	0	6.10843	11.118	DNM2
182	Plasma Membrane Bounded Cell Projection Assembly (GO:0120031)	1/275	0.164767	0.176536	0	0	5.99544	10.8111	ABLIM1
406	Organelle Biogenesis And Maintenance R-HSA-1852241	1/275	0.164767	0.187162	0	0	5.99544	10.8111	NCOA6
234	Secretory Granule Membrane (GO:0030667)	1/279	0.166967	0.201216	0	0	5.90797	10.575	DSP
275	DNA-binding Transcription Factor Binding (GO:0140297)	1/282	0.168613	0.224817	0	0	5.84401	10.4032	JUP
183	Central Nervous System Development (GO:0007417)	1/283	0.169161	0.180254	0	0	5.82299	10.3469	NCOA6
184	DNA Repair (GO:0006281)	1/291	0.173534	0.183908	0	0	5.66006	9.91292	XRCC6
302	MicroRNAs in cancer	1/310	0.183835	0.195325	0	0	5.3069	8.98839	VIM
407	DNA Repair R-HSA-73894	1/310	0.183835	0.206815	0	0	5.3069	8.98839	XRCC6
185	Protein Transport (GO:0015031)	1/313	0.185451	0.195475	0	0	5.25507	8.85462	DNM2
276	Cadherin Binding (GO:0045296)	1/319	0.188673	0.239209	0	0	5.15435	8.59611	JUP
186	Organelle Assembly (GO:0070925)	1/322	0.19028	0.199487	0	0	5.1054	8.47118	ABLIM1
277	Tubulin Binding (GO:0015631)	1/322	0.19028	0.239209	0	0	5.1054	8.47118	DNM2
235	Actin Cytoskeleton (GO:0015629)	1/327	0.192951	0.226718	0	0	5.02582	8.26907	ABLIM1
236	Microtubule Cytoskeleton (GO:0015630)	1/342	0.200917	0.230319	0	0	4.80108	7.70508	DNM2
187	Positive Regulation Of Protein Phosphorylation (GO:0001934)	1/377	0.219221	0.2286	0	0	4.34641	6.59643	XRCC6
408	M Phase R-HSA-68886	1/380	0.220772	0.246003	0	0	4.31135	6.51282	SET
188	Negative Regulation Of Programmed Cell Death (GO:0043069)	1/381	0.221288	0.229528	0	0	4.29978	6.48531	TPT1
189	DNA Damage Response (GO:0006974)	1/384	0.222835	0.22991	0	0	4.26545	6.40381	NCOA6
237	Cytoplasmic Vesicle Membrane (GO:0030659)	1/389	0.225407	0.252242	0	0	4.20941	6.27137	DNM2
190	Cellular Response To Oxygen-Containing Compound (GO:1901701)	1/406	0.234094	0.240254	0	0	4.02922	5.85056	VIM
191	Vesicle-Mediated Transport (GO:0016192)	1/411	0.236632	0.241587	0	0	3.97907	5.73483	DNM2
278	GTPase Regulator Activity (GO:0030695)	1/424	0.243193	0.297236	0	0	3.85422	5.44947	TBC1D15
238	Golgi Membrane (GO:0000139)	1/427	0.2447	0.267463	0	0	3.82649	5.38663	DNM2
192	Regulation Of Nucleic Acid-Templated Transcription (GO:1903506)	1/452	0.257149	0.261167	0	0	3.60976	4.9024	DNM2
409	Signaling By Interleukins R-HSA-449147	1/453	0.257643	0.28438	0	0	3.60159	4.88439	VIM
279	Kinase Binding (GO:0019900)	1/460	0.261093	0.3034	0	0	3.54539	4.76102	FAM83G
280	Transcription Cis-Regulatory Region Binding (GO:0000976)	1/474	0.267948	0.3034	0	0	3.43798	4.5277	XRCC6
281	Purine Ribonucleoside Triphosphate Binding (GO:0035639)	1/476	0.268923	0.3034	0	0	3.42316	4.49574	DNM2
193	Positive Regulation Of Gene Expression (GO:0010628)	1/480	0.270868	0.273675	0	0	3.39388	4.43282	VIM
410	Cell Cycle, Mitotic R-HSA-69278	1/523	0.291481	0.318722	0	0	3.10744	3.83079	SET
303	Pathways in cancer	1/531	0.295256	0.295256	0	0	3.05928	3.73205	JUP
239	Neuron Projection (GO:0043005)	1/557	0.307397	0.328356	0	0	2.91232	3.43542	VIM
411	Disease R-HSA-1643685	2/1736	0.313313	0.339423	0	0	1.91391	2.2212	XRCC6;NMT1
412	Sensory Perception R-HSA-9709957	1/616	0.334235	0.358766	0	0	2.62493	2.87669	NMT1
282	Double-Stranded DNA Binding (GO:0003690)	1/650	0.349262	0.380429	0	0	2.48305	2.612	XRCC6
413	Cell Cycle R-HSA-1640170	1/654	0.351009	0.373346	0	0	2.46733	2.58315	SET
283	Protein Homodimerization Activity (GO:0042803)	1/662	0.35449	0.380429	0	0	2.43646	2.52679	JUP
414	Metabolism Of RNA R-HSA-8953854	1/666	0.356225	0.37548	0	0	2.4213	2.49925	SET
415	Cytokine Signaling In Immune System R-HSA-1280215	1/702	0.37164	0.388231	0	0	2.29268	2.26936	VIM
194	Protein Modification Process (GO:0036211)	1/711	0.37544	0.377375	0	0	2.26256	2.21653	DSP
284	Sequence-Specific Double-Stranded DNA Binding (GO:1990837)	1/715	0.377122	0.386751	0	0	2.24942	2.1936	XRCC6
285	Sequence-Specific DNA Binding (GO:0043565)	1/717	0.377962	0.386751	0	0	2.2429	2.18226	XRCC6
416	Cellular Responses To Stress R-HSA-2262752	1/722	0.380056	0.389211	0	0	2.22677	2.15426	NCOA6
417	Metabolism Of Lipids R-HSA-556833	1/732	0.384225	0.389211	0	0	2.19517	2.09974	NCOA6
418	Adaptive Immune System R-HSA-1280218	1/733	0.38464	0.389211	0	0	2.19205	2.09439	DNM2
419	Cellular Responses To Stimuli R-HSA-8953897	1/736	0.385885	0.389211	0	0	2.18277	2.07847	NCOA6
420	Metabolism R-HSA-1430728	2/2049	0.390642	0.390642	0	0	1.59346	1.4978	NCOA6;DNM2
240	Nucleolus (GO:0005730)	1/771	0.400237	0.412657	0	0	2.07976	1.90443	XRCC6
241	Nuclear Lumen (GO:0031981)	1/780	0.403877	0.412657	0	0	2.05477	1.86295	XRCC6
242	Bounding Membrane Of Organelle (GO:0098588)	1/819	0.419417	0.419417	0	0	1.95283	1.6968	DNM2
286	DNA Binding (GO:0003677)	1/846	0.429955	0.429955	0	0	1.88777	1.59342	XRCC6
195	Regulation Of Gene Expression (GO:0010468)	1/1127	0.529628	0.529628	0	0	1.39587	0.887189	DNM2

## Sheet: Cluster5
	Term	Overlap	P.value	Adjusted.P.value	Old.P.value	Old.Adjusted.P.value	Odds.Ratio	Combined.Score	Genes
351	Apical Junction Complex (GO:0043296)	4/106	6.10705e-06	0.000213747	0	0	41.0217	492.509	TJP1;CGN;NECTIN2;TJP2
1	Regulation Of Blood-Brain Barrier Permeability (GO:1905603)	2/6	1.89218e-05	0.00662263	0	0	475.548	5171.67	TJP1;TJP2
386	Cadherin Binding (GO:0045296)	5/319	2.65836e-05	0.00135576	0	0	17.3947	183.257	TJP1;LASP1;FLNA;CGN;TJP2
466	Signal Transduction R-HSA-162582	11/2465	3.17811e-05	0.00240386	0	0	6.54554	67.7898	GPSM1;NOTCH2;TJP1;DDX39B;USP9X;KIF14;FLNA;RBBP6;CGN;GAS8;TJP2
437	Tight junction	4/169	3.84293e-05	0.00104615	0	0	25.2785	256.998	TJP1;AFDN;CGN;TJP2
2	Establishment Of Endothelial Intestinal Barrier (GO:0090557)	2/10	5.66073e-05	0.00806614	0	0	237.726	2324.81	TJP1;TJP2
467	Signaling By Rho GTPases R-HSA-194315	6/644	6.87972e-05	0.00240386	0	0	10.6983	102.536	DDX39B;USP9X;KIF14;FLNA;RBBP6;TJP2
3	Positive Regulation Of Vascular Permeability (GO:0043117)	2/11	6.91384e-05	0.00806614	0	0	211.302	2024.14	TJP1;TJP2
468	Apoptotic Cleavage Of Cell Adhesion Proteins R-HSA-351906	2/11	6.91384e-05	0.00240386	0	0	211.302	2024.14	TJP1;TJP2
438	Adherens junction	3/71	7.21485e-05	0.00104615	0	0	43.9169	418.826	TJP1;AFDN;NECTIN2
469	Signaling By Rho GTPases, Miro GTPases And RHOBTB3 R-HSA-9716542	6/660	7.88151e-05	0.00240386	0	0	10.428	98.5276	DDX39B;USP9X;KIF14;FLNA;RBBP6;TJP2
352	Bicellular Tight Junction (GO:0005923)	3/81	0.000106898	0.00187071	0	0	38.2673	349.902	TJP1;CGN;TJP2
470	RHO GTPase Cycle R-HSA-9012999	5/441	0.000123478	0.00259743	0	0	12.4497	112.04	DDX39B;USP9X;KIF14;RBBP6;TJP2
471	Cell Junction Organization R-HSA-446728	3/86	0.000127743	0.00259743	0	0	35.953	322.336	AFDN;FLNA;NECTIN2
4	Protein Localization To Cell-Cell Junction (GO:0150105)	2/15	0.000131623	0.011517	0	0	146.256	1306.88	TJP1;TJP2
353	Tight Junction (GO:0070160)	3/93	0.000161129	0.00187984	0	0	33.145	289.465	TJP1;CGN;TJP2
472	Signaling By Hippo R-HSA-2028269	2/20	0.000237344	0.00413657	0	0	105.603	881.364	TJP1;TJP2
5	Protein Localization To Cell Junction (GO:1902414)	2/23	0.000315381	0.0189744	0	0	90.5034	729.614	TJP1;TJP2
6	Positive Regulation Of Cell Cycle Process (GO:0090068)	3/118	0.000325275	0.0189744	0	0	25.907	208.055	GEN1;SVIL;KIF14
473	Cell-Cell Communication R-HSA-1500931	3/120	0.000341731	0.0052114	0	0	25.4615	203.221	AFDN;FLNA;NECTIN2
354	Cell-Cell Junction (GO:0005911)	4/299	0.000346389	0.00303091	0	0	14.046	111.918	TJP1;FLNA;NECTIN2;TJP2
7	Establishment Of Endothelial Barrier (GO:0061028)	2/28	0.000469558	0.0220494	0	0	73.0806	560.069	TJP1;TJP2
355	Actin Cytoskeleton (GO:0015629)	4/327	0.000485905	0.00340134	0	0	12.8102	97.7351	SVIL;LASP1;SIPA1L1;FLNA
8	Maintenance Of Blood-Brain Barrier (GO:0035633)	2/29	0.000503987	0.0220494	0	0	70.3704	534.319	TJP1;TJP2
474	Adherens Junctions Interactions R-HSA-418990	2/29	0.000503987	0.00683183	0	0	70.3704	534.319	AFDN;NECTIN2
9	Regulation Of mRNA Processing (GO:0050684)	2/35	0.000735512	0.0286032	0	0	57.5584	415.281	SRPK2;SRSF3
475	RHOBTB GTPase Cycle R-HSA-9706574	2/35	0.000735512	0.00897324	0	0	57.5584	415.281	DDX39B;RBBP6
10	Negative Regulation Of Programmed Cell Death (GO:0043069)	4/381	0.000861614	0.0290638	0	0	10.9451	77.2366	NOTCH2;TJP1;KIF14;FLNA
476	Apoptotic Cleavage Of Cellular Proteins R-HSA-111465	2/38	0.000867197	0.009618	0	0	52.754	371.928	TJP1;TJP2
356	Focal Adhesion (GO:0005925)	4/387	0.000913221	0.00492694	0	0	10.7704	75.3768	SVIL;LASP1;FLNA;NECTIN2
11	Positive Regulation Of Cytokinesis (GO:0032467)	2/39	0.000913434	0.0290638	0	0	51.3256	359.192	SVIL;KIF14
357	Cell-Substrate Junction (GO:0030055)	4/395	0.000985388	0.00492694	0	0	10.5457	73.0023	SVIL;LASP1;FLNA;NECTIN2
12	Positive Regulation Of Cell Division (GO:0051781)	2/43	0.00111003	0.0323757	0	0	46.3089	315.057	SVIL;KIF14
13	Homotypic Cell-Cell Adhesion (GO:0034109)	2/46	0.00126962	0.0341822	0	0	43.145	287.736	FLNA;TJP2
439	Vibrio cholerae infection	2/50	0.0014985	0.0144855	0	0	39.5417	257.151	TJP1;TJP2
477	Apoptotic Execution Phase R-HSA-75153	2/52	0.00161979	0.0164679	0	0	37.9562	243.886	TJP1;TJP2
14	Actin Cytoskeleton Reorganization (GO:0031532)	2/53	0.00168214	0.0382317	0	0	37.2101	237.687	SIPA1L1;FLNA
15	mRNA Splicing, Via Spliceosome (GO:0000398)	3/211	0.00175439	0.0382317	0	0	14.2565	90.4665	SRPK2;DDX39B;SRSF3
16	Regulation Of GTPase Activity (GO:0043087)	3/214	0.00182655	0.0382317	0	0	14.0517	88.6003	GPSM1;USP6NL;SIPA1L1
17	mRNA Transport (GO:0051028)	2/58	0.0020108	0.0382317	0	0	33.8793	210.364	DDX39B;SRSF3
478	mRNA 3-End Processing R-HSA-72187	2/58	0.0020108	0.0188706	0	0	33.8793	210.364	DDX39B;SRSF3
18	Negative Regulation Of Apoptotic Process (GO:0043066)	4/482	0.00205009	0.0382317	0	0	8.58798	53.1585	NOTCH2;TJP1;KIF14;FLNA
479	Cell-cell Junction Organization R-HSA-421270	2/61	0.00222145	0.0193584	0	0	32.1517	196.434	AFDN;NECTIN2
19	Spliceosomal Complex Assembly (GO:0000245)	2/62	0.0022939	0.0382317	0	0	31.6143	192.136	SRPK2;DDX39B
20	mRNA Export From Nucleus (GO:0006406)	2/62	0.0022939	0.0382317	0	0	31.6143	192.136	DDX39B;SRSF3
21	Cell Junction Organization (GO:0034330)	2/62	0.0022939	0.0382317	0	0	31.6143	192.136	TJP1;TJP2
387	Microtubule Binding (GO:0008017)	3/239	0.00250092	0.0477752	0	0	12.5472	75.1718	KIF14;CGN;GAS8
22	RNA Export From Nucleus (GO:0006405)	2/65	0.00251789	0.0400574	0	0	30.1043	180.154	DDX39B;SRSF3
480	RNA Polymerase II Transcription Termination R-HSA-73856	2/67	0.00267274	0.0217383	0	0	29.1751	172.852	DDX39B;SRSF3
23	Cell-Cell Junction Organization (GO:0045216)	2/68	0.00275181	0.0418753	0	0	28.7316	169.387	TJP1;TJP2
481	Transport Of Mature mRNA Derived From An Intron-Containing Transcript R-HSA-159236	2/74	0.00324916	0.0247748	0	0	26.3294	150.85	DDX39B;SRSF3
24	Regulation Of Ras Protein Signal Transduction (GO:0046578)	2/76	0.00342362	0.0494494	0	0	25.6152	145.419	NOTCH2;KIF14
25	Regulation Of Cytokinesis (GO:0032465)	2/80	0.00378543	0.0494494	0	0	24.2967	135.493	SVIL;KIF14
482	Transport Of Mature Transcript To Cytoplasm R-HSA-72202	2/83	0.00406801	0.029194	0	0	23.3933	128.771	DDX39B;SRSF3
26	Positive Regulation Of Binding (GO:0051099)	2/91	0.00486801	0.0494494	0	0	21.282	113.328	GPSM1;USP9X
483	Signaling By TGF-beta Receptor Complex R-HSA-170834	2/91	0.00486801	0.0329943	0	0	21.282	113.328	USP9X;CGN
27	Regulation Of mRNA Splicing, Via Spliceosome (GO:0048024)	2/94	0.00518526	0.0494494	0	0	20.5849	108.316	SRPK2;SRSF3
28	RNA Splicing (GO:0008380)	2/98	0.00562273	0.0494494	0	0	19.7232	102.185	SRPK2;DDX39B
29	R-loop Processing (GO:0062176)	1/5	0.00573729	0.0494494	0	0	226.966	1171.32	SRPK2
30	Positive Regulation Of Natural Killer Cell Mediated Cytotoxicity Directed Against Tumor Cell Target (GO:0002860)	1/5	0.00573729	0.0494494	0	0	226.966	1171.32	NECTIN2
31	Positive Regulation Of Natural Killer Cell Mediated Immune Response To Tumor Cell (GO:0002857)	1/5	0.00573729	0.0494494	0	0	226.966	1171.32	NECTIN2
32	Regulation Of Immunoglobulin Mediated Immune Response (GO:0002889)	1/5	0.00573729	0.0494494	0	0	226.966	1171.32	NECTIN2
33	Resolution Of Recombination Intermediates (GO:0071139)	1/5	0.00573729	0.0494494	0	0	226.966	1171.32	GEN1
34	Positive Regulation Of Protein Localization To Cilium (GO:1903566)	1/5	0.00573729	0.0494494	0	0	226.966	1171.32	GAS8
358	Zonula Adherens (GO:0005915)	1/5	0.00573729	0.0251006	0	0	226.966	1171.32	NECTIN2
388	5'-Flap Endonuclease Activity (GO:0017108)	1/5	0.00573729	0.0477752	0	0	226.966	1171.32	GEN1
484	SARS-CoV-2 Targets PDZ Proteins In Cell-Cell Junction R-HSA-9705677	1/5	0.00573729	0.0333309	0	0	226.966	1171.32	TJP1
485	Defective LFNG Causes SCDO3 R-HSA-5083630	1/5	0.00573729	0.0333309	0	0	226.966	1171.32	NOTCH2
486	RUNX1 Regulates Expression Of Components Of Tight Junctions R-HSA-8935964	1/5	0.00573729	0.0333309	0	0	226.966	1171.32	TJP1
389	Tubulin Binding (GO:0015631)	3/322	0.00576676	0.0477752	0	0	9.24357	47.6566	KIF14;CGN;GAS8
35	Regulation Of Organelle Organization (GO:0033043)	2/100	0.00584762	0.0494494	0	0	19.3188	99.3316	USP6NL;TJP1
36	Activation Of GTPase Activity (GO:0090630)	2/102	0.0060766	0.0494494	0	0	18.9305	96.6081	USP6NL;SIPA1L1
37	Regulation Of RNA Splicing (GO:0043484)	2/102	0.0060766	0.0494494	0	0	18.9305	96.6081	SRPK2;SRSF3
38	Regulation Of Neuron Apoptotic Process (GO:0043523)	2/105	0.00642767	0.0494494	0	0	18.3763	92.748	SRPK2;KIF14
39	Protein Import Into Peroxisome Matrix, Receptor Recycling (GO:0016562)	1/6	0.00688097	0.0494494	0	0	181.564	904.005	USP9X
40	Marginal Zone B Cell Differentiation (GO:0002315)	1/6	0.00688097	0.0494494	0	0	181.564	904.005	NOTCH2
41	Positive Regulation Of Mast Cell Activation (GO:0033005)	1/6	0.00688097	0.0494494	0	0	181.564	904.005	NECTIN2
42	Adherens Junction Maintenance (GO:0034334)	1/6	0.00688097	0.0494494	0	0	181.564	904.005	TJP1
43	Regulation Of Microtubule Binding (GO:1904526)	1/6	0.00688097	0.0494494	0	0	181.564	904.005	GAS8
44	Regulation Of TORC2 Signaling (GO:1903939)	1/6	0.00688097	0.0494494	0	0	181.564	904.005	USP9X
45	Regulation Of Atrial Cardiac Muscle Cell Membrane Repolarization (GO:0060372)	1/6	0.00688097	0.0494494	0	0	181.564	904.005	FLNA
46	Regulation Of Osteoclast Development (GO:2001204)	1/6	0.00688097	0.0494494	0	0	181.564	904.005	NOTCH2
390	Flap Endonuclease Activity (GO:0048256)	1/6	0.00688097	0.0477752	0	0	181.564	904.005	GEN1
391	Primary miRNA Binding (GO:0070878)	1/6	0.00688097	0.0477752	0	0	181.564	904.005	SRSF3
487	Pre-NOTCH Processing In Endoplasmic Reticulum R-HSA-1912399	1/6	0.00688097	0.0381581	0	0	181.564	904.005	NOTCH2
47	Mitotic Sister Chromatid Segregation (GO:0000070)	2/111	0.00715702	0.0494494	0	0	17.3595	85.7503	KIF14;FLNA
48	Regulation Of Apoptotic Process (GO:0042981)	4/705	0.00794511	0.0494494	0	0	5.78902	27.9911	NOTCH2;TJP1;KIF14;FLNA
49	Regulation Of Protein Localization To Cilium (GO:1903564)	1/7	0.00802339	0.0494494	0	0	151.295	730.06	GAS8
50	Protein Deubiquitination Involved In Ubiquitin-Dependent Protein Catabolic Process (GO:0071947)	1/7	0.00802339	0.0494494	0	0	151.295	730.06	USP9X
51	Translocation Of Molecules Into Host (GO:0044417)	1/7	0.00802339	0.0494494	0	0	151.295	730.06	DDX39B
52	Plasma Membrane To Endosome Transport (GO:0048227)	1/7	0.00802339	0.0494494	0	0	151.295	730.06	USP6NL
53	Positive Regulation Of DNA Demethylation (GO:1901537)	1/7	0.00802339	0.0494494	0	0	151.295	730.06	USP9X
54	Viral mRNA Export From Host Cell Nucleus (GO:0046784)	1/7	0.00802339	0.0494494	0	0	151.295	730.06	DDX39B
55	Regulation Of Natural Killer Cell Mediated Cytotoxicity Directed Against Tumor Cell Target (GO:0002858)	1/7	0.00802339	0.0494494	0	0	151.295	730.06	NECTIN2
56	Blood Coagulation, Intrinsic Pathway (GO:0007597)	1/7	0.00802339	0.0494494	0	0	151.295	730.06	FLNA
392	Crossover Junction DNA Endonuclease Activity (GO:0008821)	1/7	0.00802339	0.0477752	0	0	151.295	730.06	GEN1
488	Nectin/Necl Trans Heterodimerization R-HSA-420597	1/7	0.00802339	0.0416078	0	0	151.295	730.06	NECTIN2
57	Regulation Of Protein Binding (GO:0043393)	2/118	0.00805319	0.0494494	0	0	16.3062	78.6236	USP9X;GAS8
489	Signaling By TGFB Family Members R-HSA-9006936	2/119	0.00818515	0.0416078	0	0	16.1661	77.6849	USP9X;CGN
58	Ubiquitin-Dependent Protein Catabolic Process (GO:0006511)	3/367	0.00826533	0.049877	0	0	8.08228	38.7601	USP9X;KIF14;RBBP6
59	Regulation Of Cell Motility (GO:2000145)	2/123	0.00872275	0.0509142	0	0	15.6285	74.1075	KIF14;FLNA
60	RNA Secondary Structure Unwinding (GO:0010501)	1/8	0.00916455	0.0509142	0	0	129.675	608.49	DDX39B
61	Regulation Of DNA Demethylation (GO:1901535)	1/8	0.00916455	0.0509142	0	0	129.675	608.49	USP9X
62	Cilium Movement Involved In Cell Motility (GO:0060294)	1/8	0.00916455	0.0509142	0	0	129.675	608.49	GAS8
63	Positive Regulation Of Cell-Cell Adhesion Mediated By Cadherin (GO:2000049)	1/8	0.00916455	0.0509142	0	0	129.675	608.49	TJP1
393	Guanylate Kinase Activity (GO:0004385)	1/8	0.00916455	0.0477752	0	0	129.675	608.49	TJP2
394	Endodeoxyribonuclease Activity, Producing 5'-Phosphomonoesters (GO:0016888)	1/8	0.00916455	0.0477752	0	0	129.675	608.49	GEN1
64	Regulation Of Mast Cell Activation (GO:0033003)	1/9	0.0103045	0.0554856	0	0	113.46	519.101	NECTIN2
65	Negative Regulation Of Transcription By RNA Polymerase I (GO:0016479)	1/9	0.0103045	0.0554856	0	0	113.46	519.101	FLNA
395	co-SMAD Binding (GO:0070410)	1/9	0.0103045	0.0477752	0	0	113.46	519.101	USP9X
396	DNA Endonuclease Activity, Producing 3'-Phosphomonoesters (GO:0016889)	1/9	0.0103045	0.0477752	0	0	113.46	519.101	GEN1
490	OAS Antiviral Response R-HSA-8983711	1/9	0.0103045	0.0483517	0	0	113.46	519.101	FLNA
491	GP1b-IX-V Activation Signaling R-HSA-430116	1/9	0.0103045	0.0483517	0	0	113.46	519.101	FLNA
66	Regulation Of Cell Population Proliferation (GO:0042127)	4/766	0.0105758	0.0560836	0	0	5.30874	24.1505	SRPK2;TJP1;KIF14;GAS8
67	Cell Proliferation In Forebrain (GO:0021846)	1/10	0.0114431	0.0580448	0	0	100.848	450.83	KIF14
68	Notch Signaling Involved In Heart Development (GO:0061314)	1/10	0.0114431	0.0580448	0	0	100.848	450.83	NOTCH2
69	Atrial Septum Morphogenesis (GO:0060413)	1/10	0.0114431	0.0580448	0	0	100.848	450.83	NOTCH2
70	Actin Filament Organization (GO:0007015)	2/144	0.0117963	0.0585468	0	0	13.3032	59.0656	SVIL;FLNA
397	GTPase Regulator Activity (GO:0030695)	3/424	0.0122281	0.0484802	0	0	6.9677	30.6859	GPSM1;USP6NL;SIPA1L1
71	Positive Regulation Of Keratinocyte Proliferation (GO:0010838)	1/11	0.0125805	0.0585468	0	0	90.7591	397.126	NOTCH2
72	Positive Regulation Of Mitotic Cell Cycle Spindle Assembly Checkpoint (GO:0090267)	1/11	0.0125805	0.0585468	0	0	90.7591	397.126	GEN1
73	Actin Crosslink Formation (GO:0051764)	1/11	0.0125805	0.0585468	0	0	90.7591	397.126	FLNA
74	Positive Regulation Of Spindle Checkpoint (GO:0090232)	1/11	0.0125805	0.0585468	0	0	90.7591	397.126	GEN1
75	Intestinal Absorption (GO:0050892)	1/11	0.0125805	0.0585468	0	0	90.7591	397.126	TJP2
76	protein-RNA Complex Assembly (GO:0022618)	2/150	0.0127501	0.0585468	0	0	12.76	55.6618	SRPK2;DDX39B
359	Adherens Junction (GO:0005912)	2/150	0.0127501	0.0495835	0	0	12.76	55.6618	TJP1;NECTIN2
440	Spliceosome	2/150	0.0127501	0.0924379	0	0	12.76	55.6618	DDX39B;SRSF3
77	Regulation Of Cell Migration (GO:0030334)	3/434	0.0130185	0.0585468	0	0	6.80255	29.5325	TJP1;KIF14;FLNA
78	Regulation Of Cellular Component Organization (GO:0051128)	2/153	0.0132393	0.0585468	0	0	12.5046	54.0769	TJP1;KIF14
398	Magnesium Ion Binding (GO:0000287)	2/155	0.0135699	0.0484802	0	0	12.3399	53.0602	GEN1;SRPK2
79	Positive Regulation Of Integrin-Mediated Signaling Pathway (GO:2001046)	1/12	0.0137167	0.0585468	0	0	82.5041	353.872	FLNA
80	Cell-Cell Junction Maintenance (GO:0045217)	1/12	0.0137167	0.0585468	0	0	82.5041	353.872	TJP1
81	Nuclear Body Organization (GO:0030575)	1/12	0.0137167	0.0585468	0	0	82.5041	353.872	SRPK2
82	Primary miRNA Processing (GO:0031053)	1/12	0.0137167	0.0585468	0	0	82.5041	353.872	SRSF3
399	GDP-dissociation Inhibitor Activity (GO:0005092)	1/12	0.0137167	0.0484802	0	0	82.5041	353.872	GPSM1
492	NOTCH2 Intracellular Domain Regulates Transcription R-HSA-2197563	1/12	0.0137167	0.061979	0	0	82.5041	353.872	NOTCH2
83	Protein Import Into Peroxisome Matrix (GO:0016558)	1/13	0.0148516	0.0597477	0	0	75.625	318.355	USP9X
84	Mature B Cell Differentiation Involved In Immune Response (GO:0002313)	1/13	0.0148516	0.0597477	0	0	75.625	318.355	NOTCH2
85	Positive Regulation Of T Cell Receptor Signaling Pathway (GO:0050862)	1/13	0.0148516	0.0597477	0	0	75.625	318.355	NECTIN2
86	Cytoplasmic Sequestering Of Protein (GO:0051220)	1/13	0.0148516	0.0597477	0	0	75.625	318.355	FLNA
87	Atrial Septum Development (GO:0003283)	1/13	0.0148516	0.0597477	0	0	75.625	318.355	NOTCH2
400	K63-linked Deubiquitinase Activity (GO:0061578)	1/13	0.0148516	0.0484802	0	0	75.625	318.355	USP9X
493	RNA Polymerase II Transcription R-HSA-73857	5/1312	0.0150337	0.065504	0	0	3.96795	16.6553	NOTCH2;TJP1;DDX39B;USP9X;SRSF3
401	Kinase Binding (GO:0019900)	3/460	0.0152095	0.0484802	0	0	6.407	26.8187	KIF14;FLNA;RBBP6
88	Protein Activation Cascade (GO:0072376)	1/14	0.0159852	0.0603158	0	0	69.8042	288.716	FLNA
89	Regulation Of Hemopoiesis (GO:1903706)	1/14	0.0159852	0.0603158	0	0	69.8042	288.716	NOTCH2
90	Mitotic Recombination (GO:0006312)	1/14	0.0159852	0.0603158	0	0	69.8042	288.716	GEN1
91	Regulation Of Integrin Activation (GO:0033623)	1/14	0.0159852	0.0603158	0	0	69.8042	288.716	KIF14
92	Blood Coagulation, Fibrin Clot Formation (GO:0072378)	1/14	0.0159852	0.0603158	0	0	69.8042	288.716	FLNA
93	Epiboly Involved In Wound Healing (GO:0090505)	1/15	0.0171176	0.0603158	0	0	64.8149	263.644	FLNA
94	Positive Regulation Of Immunoglobulin Mediated Immune Response (GO:0002891)	1/15	0.0171176	0.0603158	0	0	64.8149	263.644	NECTIN2
95	Positive Regulation Of Potassium Ion Transport (GO:0043268)	1/15	0.0171176	0.0603158	0	0	64.8149	263.644	FLNA
96	Regulation Of mRNA Metabolic Process (GO:1903311)	1/15	0.0171176	0.0603158	0	0	64.8149	263.644	SRPK2
97	Positive Regulation Of Cell Activation (GO:0050867)	1/15	0.0171176	0.0603158	0	0	64.8149	263.644	FLNA
98	Positive Regulation Of Sprouting Angiogenesis (GO:1903672)	1/15	0.0171176	0.0603158	0	0	64.8149	263.644	TJP1
99	Regulation Of Bicellular Tight Junction Assembly (GO:2000810)	1/15	0.0171176	0.0603158	0	0	64.8149	263.644	TJP1
402	K48-linked Deubiquitinase Activity (GO:1990380)	1/15	0.0171176	0.0498036	0	0	64.8149	263.644	USP9X
100	Positive Regulation Of Cell Population Proliferation (GO:0008284)	3/483	0.0173129	0.0603158	0	0	6.09281	24.7143	SRPK2;TJP1;KIF14
494	Apoptosis R-HSA-109581	2/178	0.0176272	0.0718178	0	0	10.7148	43.2698	TJP1;TJP2
101	RNA Splicing, Via Transesterification Reactions With Bulged Adenosine As Nucleophile (GO:0000377)	2/180	0.0180017	0.0603158	0	0	10.5934	42.5566	DDX39B;SRSF3
102	Cell Surface Receptor Signaling Pathway Involved In Heart Development (GO:0061311)	1/16	0.0182488	0.0603158	0	0	60.4909	242.185	NOTCH2
103	Regulation Of Golgi Organization (GO:1903358)	1/16	0.0182488	0.0603158	0	0	60.4909	242.185	USP6NL
403	Four-Way Junction DNA Binding (GO:0000400)	1/16	0.0182488	0.0498036	0	0	60.4909	242.185	GEN1
495	TGF-beta Receptor Signaling In EMT (Epithelial To Mesenchymal Transition) R-HSA-2173791	1/16	0.0182488	0.0718178	0	0	60.4909	242.185	CGN
496	Cell-extracellular Matrix Interactions R-HSA-446353	1/16	0.0182488	0.0718178	0	0	60.4909	242.185	FLNA
104	RNA Processing (GO:0006396)	2/183	0.0185698	0.0603158	0	0	10.4162	41.5213	SRPK2;DDX39B
360	Microtubule (GO:0005874)	2/185	0.0189527	0.0634285	0	0	10.3013	40.8531	KIF14;GAS8
105	Megakaryocyte Differentiation (GO:0030219)	1/17	0.0193787	0.0603158	0	0	56.7074	223.63	FLNA
106	Microtubule Depolymerization (GO:0007019)	1/17	0.0193787	0.0603158	0	0	56.7074	223.63	KIF14
107	Receptor Recycling (GO:0001881)	1/17	0.0193787	0.0603158	0	0	56.7074	223.63	USP9X
108	Positive Regulation Of Potassium Ion Transmembrane Transport (GO:1901381)	1/17	0.0193787	0.0603158	0	0	56.7074	223.63	FLNA
109	Positive Regulation Of Small GTPase Mediated Signal Transduction (GO:0051057)	1/17	0.0193787	0.0603158	0	0	56.7074	223.63	NOTCH2
110	Regulation Of Mitotic Cell Cycle Spindle Assembly Checkpoint (GO:0090266)	1/17	0.0193787	0.0603158	0	0	56.7074	223.63	GEN1
111	Axonogenesis (GO:0007409)	2/188	0.0195334	0.0603158	0	0	10.1336	39.8823	NOTCH2;USP9X
361	Nucleus (GO:0005634)	10/4487	0.0199347	0.0634285	0	0	2.66318	10.4272	NOTCH2;SRPK2;SVIL;DDX39B;USP9X;ZNF507;PPP6R3;FLNA;RBBP6;TJP2
404	RNA Binding (GO:0003723)	5/1411	0.020055	0.0498036	0	0	3.669	14.3431	SRPK2;DDX39B;FLNA;SRSF3;RBBP6
405	Protein Kinase Binding (GO:0019901)	3/511	0.0200853	0.0498036	0	0	5.74872	22.4647	KIF14;RBBP6;TJP2
112	Cardiac Atrium Morphogenesis (GO:0003209)	1/18	0.0205074	0.0603158	0	0	53.369	207.444	NOTCH2
113	Pulmonary Valve Morphogenesis (GO:0003184)	1/18	0.0205074	0.0603158	0	0	53.369	207.444	NOTCH2
114	Actin Filament Capping (GO:0051693)	1/18	0.0205074	0.0603158	0	0	53.369	207.444	SVIL
115	Regulation Of DNA Damage Checkpoint (GO:2000001)	1/18	0.0205074	0.0603158	0	0	53.369	207.444	DDX39B
116	Positive Regulation Of Cation Transmembrane Transport (GO:1904064)	1/18	0.0205074	0.0603158	0	0	53.369	207.444	FLNA
117	Barbed-End Actin Filament Capping (GO:0051016)	1/18	0.0205074	0.0603158	0	0	53.369	207.444	SVIL
118	Regulation Of Cell Cycle G2/M Phase Transition (GO:1902749)	1/18	0.0205074	0.0603158	0	0	53.369	207.444	KIF14
119	Regulation Of Cell-Cell Adhesion Mediated By Cadherin (GO:2000047)	1/18	0.0205074	0.0603158	0	0	53.369	207.444	TJP1
406	Nucleoside Monophosphate Kinase Activity (GO:0050145)	1/18	0.0205074	0.0498036	0	0	53.369	207.444	TJP2
497	Activation Of SMO R-HSA-5635838	1/18	0.0205074	0.0747201	0	0	53.369	207.444	GAS8
498	Pre-NOTCH Processing In Golgi R-HSA-1912420	1/18	0.0205074	0.0747201	0	0	53.369	207.444	NOTCH2
120	Receptor Clustering (GO:0043113)	1/19	0.0216348	0.06258	0	0	50.4015	193.212	FLNA
121	Regulation Of Integrin-Mediated Signaling Pathway (GO:2001044)	1/19	0.0216348	0.06258	0	0	50.4015	193.212	FLNA
499	RHO GTPases Activate CIT R-HSA-5625900	1/19	0.0216348	0.0747201	0	0	50.4015	193.212	KIF14
407	Small GTPase Binding (GO:0031267)	2/199	0.0217262	0.0503654	0	0	9.56248	36.617	USP6NL;FLNA
500	Gene Expression (Transcription) R-HSA-74160	5/1449	0.0222493	0.0747201	0	0	3.56514	13.5669	NOTCH2;TJP1;DDX39B;USP9X;SRSF3
122	Positive Regulation Of Leukocyte Activation (GO:0002696)	1/20	0.022761	0.063225	0	0	47.7464	180.611	NECTIN2
123	Pulmonary Valve Development (GO:0003177)	1/20	0.022761	0.063225	0	0	47.7464	180.611	NOTCH2
124	Cilium-Dependent Cell Motility (GO:0060285)	1/20	0.022761	0.063225	0	0	47.7464	180.611	GAS8
125	Positive Regulation Of Antigen Receptor-Mediated Signaling Pathway (GO:0050857)	1/20	0.022761	0.063225	0	0	47.7464	180.611	NECTIN2
126	Regulation Of Phosphatase Activity (GO:0010921)	1/20	0.022761	0.063225	0	0	47.7464	180.611	PPP6R3
501	NOTCH4 Intracellular Domain Regulates Transcription R-HSA-9013695	1/20	0.022761	0.0747201	0	0	47.7464	180.611	NOTCH2
127	Protein Stabilization (GO:0050821)	2/208	0.0235935	0.0638174	0	0	9.14055	34.2477	USP9X;FLNA
502	Programmed Cell Death R-HSA-5357801	2/208	0.0235935	0.0747201	0	0	9.14055	34.2477	TJP1;TJP2
128	Positive Regulation Of Natural Killer Cell Mediated Cytotoxicity (GO:0045954)	1/21	0.0238859	0.0638174	0	0	45.3568	169.383	NECTIN2
129	Modulation By Symbiont Of Entry Into Host (GO:0052372)	1/21	0.0238859	0.0638174	0	0	45.3568	169.383	NECTIN2
130	Negative Regulation Of GTPase Activity (GO:0034260)	1/21	0.0238859	0.0638174	0	0	45.3568	169.383	GPSM1
131	Positive Regulation Of Smoothened Signaling Pathway (GO:0045880)	1/21	0.0238859	0.0638174	0	0	45.3568	169.383	GAS8
362	Gap Junction (GO:0005921)	1/21	0.0238859	0.0696673	0	0	45.3568	169.383	TJP1
503	RHO GTPases Activate PAKs R-HSA-5627123	1/21	0.0238859	0.0747201	0	0	45.3568	169.383	FLNA
504	NOTCH2 Activation And Transmission Of Signal To Nucleus R-HSA-2979096	1/21	0.0238859	0.0747201	0	0	45.3568	169.383	NOTCH2
441	Rap1 signaling pathway	2/210	0.0240172	0.1393	0	0	9.05174	33.7538	AFDN;SIPA1L1
408	GTPase Activator Activity (GO:0005096)	2/211	0.0242302	0.0537279	0	0	9.00797	33.5111	USP6NL;SIPA1L1
132	mRNA Processing (GO:0006397)	2/214	0.0248741	0.0658148	0	0	8.87916	32.799	DDX39B;SRSF3
133	Regulation Of Cardiac Muscle Cell Membrane Repolarization (GO:0099623)	1/22	0.0250096	0.0658148	0	0	43.1948	159.324	FLNA
134	Regulation Of Centrosome Cycle (GO:0046605)	1/23	0.0261321	0.0667609	0	0	41.2293	150.264	GEN1
135	Positive Regulation Of Neuron Apoptotic Process (GO:0043525)	1/23	0.0261321	0.0667609	0	0	41.2293	150.264	SRPK2
136	Axon Extension (GO:0048675)	1/23	0.0261321	0.0667609	0	0	41.2293	150.264	USP9X
137	Regulation Of Cell Junction Assembly (GO:1901888)	1/23	0.0261321	0.0667609	0	0	41.2293	150.264	TJP1
505	Telomere Extension By Telomerase R-HSA-171319	1/23	0.0261321	0.0759075	0	0	41.2293	150.264	PPP6R3
506	RHOBTB1 GTPase Cycle R-HSA-9013422	1/23	0.0261321	0.0759075	0	0	41.2293	150.264	RBBP6
507	RHOBTB2 GTPase Cycle R-HSA-9013418	1/23	0.0261321	0.0759075	0	0	41.2293	150.264	DDX39B
138	Positive Regulation Of Natural Killer Cell Mediated Immunity (GO:0002717)	1/24	0.0272533	0.0675556	0	0	39.4348	142.067	NECTIN2
139	Regulation Of Viral Life Cycle (GO:1903900)	1/24	0.0272533	0.0675556	0	0	39.4348	142.067	NECTIN2
140	Amyloid Fibril Formation (GO:1990000)	1/24	0.0272533	0.0675556	0	0	39.4348	142.067	USP9X
409	GTPase Binding (GO:0051020)	2/225	0.0272946	0.058001	0	0	8.43647	30.3803	USP6NL;FLNA
141	Cardiac Conduction System Development (GO:0003161)	1/25	0.0283733	0.0675556	0	0	37.7898	134.619	NOTCH2
142	Regulation Of Keratinocyte Proliferation (GO:0010837)	1/25	0.0283733	0.0675556	0	0	37.7898	134.619	NOTCH2
143	Wound Healing, Spreading Of Cells (GO:0044319)	1/25	0.0283733	0.0675556	0	0	37.7898	134.619	FLNA
144	Negative Regulation Of Stress Fiber Assembly (GO:0051497)	1/25	0.0283733	0.0675556	0	0	37.7898	134.619	TJP1
145	Regulation Of Actin Cytoskeleton Reorganization (GO:2000249)	1/25	0.0283733	0.0675556	0	0	37.7898	134.619	NOTCH2
146	Regulation Of Myelination (GO:0031641)	1/25	0.0283733	0.0675556	0	0	37.7898	134.619	KIF14
147	Regulation Of Postsynapse Organization (GO:0099175)	1/25	0.0283733	0.0675556	0	0	37.7898	134.619	SIPA1L1
148	Positive Regulation Of GTPase Activity (GO:0043547)	2/234	0.0293436	0.0692586	0	0	8.1055	28.6017	USP6NL;SIPA1L1
149	Protein Localization To Cell Surface (GO:0034394)	1/26	0.0294921	0.0692586	0	0	36.2764	127.825	FLNA
150	Positive Regulation Of Cellular Process (GO:0048522)	3/594	0.0296823	0.0692586	0	0	4.9203	17.3057	SRPK2;TJP1;KIF14
363	Cytoskeleton (GO:0005856)	3/599	0.0303264	0.0816481	0	0	4.87777	17.0514	SVIL;SIPA1L1;FLNA
508	Membrane Trafficking R-HSA-199991	3/599	0.0303264	0.0841427	0	0	4.87777	17.0514	USP6NL;TJP1;PPP6R3
151	Microtubule Polymerization Or Depolymerization (GO:0031109)	1/27	0.0306096	0.0704827	0	0	34.8794	121.605	KIF14
152	Myeloid Cell Development (GO:0061515)	1/27	0.0306096	0.0704827	0	0	34.8794	121.605	FLNA
509	Gap Junction Trafficking And Regulation R-HSA-157858	1/27	0.0306096	0.0841427	0	0	34.8794	121.605	TJP1
510	Processing Of Capped Intron-Containing Pre-mRNA R-HSA-72203	2/242	0.0312156	0.0841427	0	0	7.83214	27.1528	DDX39B;SRSF3
153	Cilium Assembly (GO:0060271)	2/243	0.0314529	0.0707266	0	0	7.79925	26.9797	FLNA;GAS8
154	Protein Depolymerization (GO:0051261)	1/28	0.0317259	0.0707266	0	0	33.5859	115.892	KIF14
155	Positive Regulation Of Protein Import Into Nucleus (GO:0042307)	1/28	0.0317259	0.0707266	0	0	33.5859	115.892	FLNA
156	Negative Regulation Of Actin Filament Bundle Assembly (GO:0032232)	1/28	0.0317259	0.0707266	0	0	33.5859	115.892	TJP1
157	Regulation Of Platelet Activation (GO:0010543)	1/28	0.0317259	0.0707266	0	0	33.5859	115.892	FLNA
511	Notch-HLH Transcription Pathway R-HSA-350054	1/28	0.0317259	0.0841427	0	0	33.5859	115.892	NOTCH2
158	Establishment Of Mitotic Spindle Orientation (GO:0000132)	1/29	0.032841	0.0722915	0	0	32.3847	110.629	GPSM1
159	Positive Regulation Of Viral Genome Replication (GO:0045070)	1/29	0.032841	0.0722915	0	0	32.3847	110.629	SRPK2
160	Regulation Of Dendritic Spine Morphogenesis (GO:0061001)	1/30	0.0339549	0.0742762	0	0	31.2665	105.766	SIPA1L1
512	Synthesis Of Active Ubiquitin: Roles Of E1 And E2 Enzymes R-HSA-8866652	1/30	0.0339549	0.0881381	0	0	31.2665	105.766	USP9X
364	Cilium (GO:0005929)	2/257	0.0348506	0.0859932	0	0	7.36583	24.7248	USP9X;GAS8
161	Regulation Of Centrosome Duplication (GO:0010824)	1/31	0.0350675	0.0758788	0	0	30.2227	101.261	GEN1
513	Downregulation Of SMAD2/3:SMAD4 Transcriptional Activity R-HSA-2173795	1/31	0.0350675	0.0882764	0	0	30.2227	101.261	USP9X
514	Vesicle-mediated Transport R-HSA-5653656	3/637	0.0354666	0.0882764	0	0	4.57642	15.2814	USP6NL;TJP1;PPP6R3
162	Female Gamete Generation (GO:0007292)	1/32	0.0361789	0.0758788	0	0	29.2463	97.0768	USP9X
163	miRNA Processing (GO:0035196)	1/32	0.0361789	0.0758788	0	0	29.2463	97.0768	SRSF3
164	Regulation Of Transcription By RNA Polymerase I (GO:0006356)	1/32	0.0361789	0.0758788	0	0	29.2463	97.0768	FLNA
165	Negative Regulation Of Proteasomal Ubiquitin-Dependent Protein Catabolic Process (GO:0032435)	1/32	0.0361789	0.0758788	0	0	29.2463	97.0768	USP9X
166	Regulation Of Natural Killer Cell Mediated Cytotoxicity (GO:0042269)	1/32	0.0361789	0.0758788	0	0	29.2463	97.0768	NECTIN2
410	Ubiquitin-Like Protein Peptidase Activity (GO:0019783)	1/32	0.0361789	0.0731439	0	0	29.2463	97.0768	USP9X
515	Signaling By NOTCH2 R-HSA-1980145	1/32	0.0361789	0.0882764	0	0	29.2463	97.0768	NOTCH2
365	Polymeric Cytoskeletal Fiber (GO:0099513)	2/265	0.0368542	0.0859932	0	0	7.13887	23.5639	KIF14;GAS8
167	Positive Regulation Of Signal Transduction (GO:0009967)	2/266	0.0371078	0.0758788	0	0	7.11147	23.4247	FLNA;GAS8
168	Regulation Of Potassium Ion Transmembrane Transport (GO:1901379)	1/33	0.037289	0.0758788	0	0	28.331	93.1821	FLNA
169	Protein K63-linked Deubiquitination (GO:0070536)	1/33	0.037289	0.0758788	0	0	28.331	93.1821	USP9X
170	Regulation Of Sprouting Angiogenesis (GO:1903670)	1/33	0.037289	0.0758788	0	0	28.331	93.1821	TJP1
171	Monoubiquitinated Protein Deubiquitination (GO:0035520)	1/33	0.037289	0.0758788	0	0	28.331	93.1821	USP9X
172	Positive Regulation Of T Cell Mediated Cytotoxicity (GO:0001916)	1/33	0.037289	0.0758788	0	0	28.331	93.1821	NECTIN2
411	DNA Secondary Structure Binding (GO:0000217)	1/33	0.037289	0.0731439	0	0	28.331	93.1821	GEN1
516	Resolution Of D-loop Structures Thru Holliday Junction Intermediates R-HSA-5693568	1/33	0.037289	0.0883878	0	0	28.331	93.1821	GEN1
517	RHO GTPase Effectors R-HSA-195258	2/269	0.0378726	0.0883878	0	0	7.0305	23.0145	KIF14;FLNA
173	Establishment Of Mitotic Spindle Localization (GO:0040001)	1/34	0.038398	0.0759725	0	0	27.4711	89.5488	GPSM1
174	Positive Regulation Of Neuron Death (GO:1901216)	1/34	0.038398	0.0759725	0	0	27.4711	89.5488	SRPK2
175	Regulation Of T Cell Receptor Signaling Pathway (GO:0050856)	1/34	0.038398	0.0759725	0	0	27.4711	89.5488	NECTIN2
176	Semaphorin-Plexin Signaling Pathway (GO:0071526)	1/34	0.038398	0.0759725	0	0	27.4711	89.5488	FLNA
518	Resolution Of D-Loop Structures R-HSA-5693537	1/34	0.038398	0.0883878	0	0	27.4711	89.5488	GEN1
177	Establishment Of Spindle Orientation (GO:0051294)	1/35	0.0395057	0.0759725	0	0	26.6618	86.1524	GPSM1
178	Platelet Aggregation (GO:0070527)	1/35	0.0395057	0.0759725	0	0	26.6618	86.1524	FLNA
179	Regulation Of G2/M Transition Of Mitotic Cell Cycle (GO:0010389)	1/35	0.0395057	0.0759725	0	0	26.6618	86.1524	KIF14
180	Adherens Junction Organization (GO:0034332)	1/35	0.0395057	0.0759725	0	0	26.6618	86.1524	TJP1
181	Positive Regulation Of Substrate Adhesion-Dependent Cell Spreading (GO:1900026)	1/35	0.0395057	0.0759725	0	0	26.6618	86.1524	FLNA
182	Skeletal Muscle Organ Development (GO:0060538)	1/35	0.0395057	0.0759725	0	0	26.6618	86.1524	SVIL
412	ATP Binding (GO:0005524)	2/279	0.040466	0.0764358	0	0	6.77325	21.7238	SRPK2;KIF14
183	Substrate Adhesion-Dependent Cell Spreading (GO:0034446)	1/36	0.0406122	0.0772515	0	0	25.8987	82.9713	KIF14
184	Negative Regulation Of Sequestering Of Calcium Ion (GO:0051283)	1/36	0.0406122	0.0772515	0	0	25.8987	82.9713	FLNA
519	SARS-CoV-2 Infection R-HSA-9694516	2/283	0.041522	0.092537	0	0	6.67548	21.2382	SRPK2;TJP1
185	Muscle Tissue Development (GO:0060537)	1/37	0.0417175	0.0780809	0	0	25.178	79.9864	SVIL
186	Regulation Of Phosphoprotein Phosphatase Activity (GO:0043666)	1/37	0.0417175	0.0780809	0	0	25.178	79.9864	PPP6R3
187	Regulation Of Cellular Component Biogenesis (GO:0044087)	1/37	0.0417175	0.0780809	0	0	25.178	79.9864	TJP1
520	RHOV GTPase Cycle R-HSA-9013424	1/37	0.0417175	0.092537	0	0	25.178	79.9864	USP9X
188	Regulation Of Protein Import Into Nucleus (GO:0042306)	1/38	0.0428215	0.0796556	0	0	24.4963	77.1809	FLNA
189	RNA Transport (GO:0050658)	1/39	0.0439244	0.0796556	0	0	23.8505	74.5396	DDX39B
190	Negative Regulation Of Proteasomal Protein Catabolic Process (GO:1901799)	1/39	0.0439244	0.0796556	0	0	23.8505	74.5396	USP9X
191	Release Of Sequestered Calcium Ion Into Cytosol (GO:0051209)	1/39	0.0439244	0.0796556	0	0	23.8505	74.5396	FLNA
192	Negative Regulation Of Ubiquitin-Dependent Protein Catabolic Process (GO:2000059)	1/39	0.0439244	0.0796556	0	0	23.8505	74.5396	USP9X
193	Neuron Projection Extension (GO:1990138)	1/39	0.0439244	0.0796556	0	0	23.8505	74.5396	USP9X
521	RHOU GTPase Cycle R-HSA-9013420	1/39	0.0439244	0.0956924	0	0	23.8505	74.5396	USP9X
194	Regulation Of Protein Dephosphorylation (GO:0035304)	1/40	0.045026	0.0799955	0	0	23.2378	72.049	PPP6R3
195	Protein Deacetylation (GO:0006476)	1/40	0.045026	0.0799955	0	0	23.2378	72.049	FLNA
196	Notch Signaling Pathway (GO:0007219)	1/40	0.045026	0.0799955	0	0	23.2378	72.049	NOTCH2
197	Gene Expression (GO:0010467)	2/296	0.045026	0.0799955	0	0	6.37609	19.7692	DDX39B;SRSF3
198	Axoneme Assembly (GO:0035082)	1/41	0.0461264	0.0811269	0	0	22.6557	69.6972	GAS8
199	Positive Regulation Of Viral Process (GO:0048524)	1/41	0.0461264	0.0811269	0	0	22.6557	69.6972	SRPK2
200	DNA Recombination (GO:0006310)	1/42	0.0472257	0.0818266	0	0	22.102	67.4734	GEN1
201	Regulation Of Axonogenesis (GO:0050770)	1/42	0.0472257	0.0818266	0	0	22.102	67.4734	SIPA1L1
202	Skeletal Muscle Tissue Development (GO:0007519)	1/42	0.0472257	0.0818266	0	0	22.102	67.4734	SVIL
522	RND1 GTPase Cycle R-HSA-9696273	1/42	0.0472257	0.101079	0	0	22.102	67.4734	KIF14
203	DNA-templated DNA Replication Maintenance Of Fidelity (GO:0045005)	1/43	0.0483236	0.0825038	0	0	21.5747	65.3677	GEN1
204	SCF-dependent Proteasomal Ubiquitin-Dependent Protein Catabolic Process (GO:0031146)	1/43	0.0483236	0.0825038	0	0	21.5747	65.3677	KIF14
205	Ephrin Receptor Signaling Pathway (GO:0048013)	1/43	0.0483236	0.0825038	0	0	21.5747	65.3677	SIPA1L1
413	snRNA Binding (GO:0017069)	1/43	0.0483236	0.0855345	0	0	21.5747	65.3677	DDX39B
523	RND2 GTPase Cycle R-HSA-9696270	1/43	0.0483236	0.101646	0	0	21.5747	65.3677	KIF14
414	Adenyl Ribonucleotide Binding (GO:0032559)	2/309	0.0486373	0.0855345	0	0	6.10206	18.4488	SRPK2;KIF14
206	Mitotic Spindle Assembly (GO:0090307)	1/44	0.0494204	0.0827615	0	0	21.0719	63.3714	FLNA
207	Positive Regulation Of Nucleocytoplasmic Transport (GO:0046824)	1/44	0.0494204	0.0827615	0	0	21.0719	63.3714	FLNA
208	Regulation Of Viral Entry Into Host Cell (GO:0046596)	1/44	0.0494204	0.0827615	0	0	21.0719	63.3714	NECTIN2
209	Regulation Of DNA-templated Transcription Elongation (GO:0032784)	1/44	0.0494204	0.0827615	0	0	21.0719	63.3714	DDX39B
366	Cortical Actin Cytoskeleton (GO:0030864)	1/44	0.0494204	0.102479	0	0	21.0719	63.3714	LASP1
367	Intracellular Membrane-Bounded Organelle (GO:0043231)	10/5175	0.0505117	0.102479	0	0	2.20597	6.58604	NOTCH2;SRPK2;SVIL;DDX39B;USP9X;ZNF507;PPP6R3;FLNA;RBBP6;TJP2
415	Potassium Channel Regulator Activity (GO:0015459)	1/45	0.050516	0.0858772	0	0	20.5919	61.4765	FLNA
210	Supramolecular Fiber Organization (GO:0097435)	2/316	0.0506249	0.0843749	0	0	5.96391	17.7922	USP9X;KIF14
211	Replication Fork Processing (GO:0031297)	1/46	0.0516104	0.0848058	0	0	20.1333	59.6759	GEN1
212	Positive Regulation Of Cell-Cell Adhesion (GO:0022409)	1/46	0.0516104	0.0848058	0	0	20.1333	59.6759	TJP1
213	Regulation Of Nervous System Development (GO:0051960)	1/46	0.0516104	0.0848058	0	0	20.1333	59.6759	KIF14
214	Negative Regulation Of Hydrolase Activity (GO:0051346)	1/47	0.0527035	0.0857964	0	0	19.6947	57.9628	GPSM1
215	Positive Regulation Of TOR Signaling (GO:0032008)	1/47	0.0527035	0.0857964	0	0	19.6947	57.9628	USP9X
368	Cell-Cell Contact Zone (GO:0044291)	1/47	0.0527035	0.102479	0	0	19.6947	57.9628	TJP2
524	Retrograde Transport At Trans-Golgi-Network R-HSA-6811440	1/48	0.0537955	0.111238	0	0	19.2747	56.3315	USP6NL
216	Nuclear Export (GO:0051168)	1/49	0.0548862	0.088936	0	0	18.8722	54.7763	DDX39B
442	Cocaine addiction	1/49	0.0548862	0.265283	0	0	18.8722	54.7763	GPSM1
217	Mitotic Metaphase Plate Congression (GO:0007080)	1/50	0.0559758	0.0895625	0	0	18.4861	53.2924	KIF14
525	Extension Of Telomeres R-HSA-180786	1/50	0.0559758	0.113817	0	0	18.4861	53.2924	PPP6R3
218	Positive Regulation Of Leukocyte Mediated Cytotoxicity (GO:0001912)	1/51	0.0570641	0.0895625	0	0	18.1155	51.875	NECTIN2
219	Metaphase Plate Congression (GO:0051310)	1/51	0.0570641	0.0895625	0	0	18.1155	51.875	KIF14
220	Regulation Of Smoothened Signaling Pathway (GO:0008589)	1/51	0.0570641	0.0895625	0	0	18.1155	51.875	GAS8
221	Microtubule Bundle Formation (GO:0001578)	1/51	0.0570641	0.0895625	0	0	18.1155	51.875	GAS8
222	Regulation Of Substrate Adhesion-Dependent Cell Spreading (GO:1900024)	1/51	0.0570641	0.0895625	0	0	18.1155	51.875	FLNA
223	Positive Regulation Of Ras Protein Signal Transduction (GO:0046579)	1/51	0.0570641	0.0895625	0	0	18.1155	51.875	NOTCH2
526	Transcriptional Activity Of SMAD2/SMAD3:SMAD4 Heterotrimer R-HSA-2173793	1/51	0.0570641	0.114128	0	0	18.1155	51.875	USP9X
224	Cardiac Muscle Tissue Development (GO:0048738)	1/52	0.0581513	0.0904575	0	0	17.7594	50.5202	NOTCH2
225	Adenylate Cyclase-Inhibiting G Protein-Coupled Receptor Signaling Pathway (GO:0007193)	1/52	0.0581513	0.0904575	0	0	17.7594	50.5202	FLNA
369	Microtubule Cytoskeleton (GO:0015630)	2/342	0.0582612	0.107323	0	0	5.50056	15.6371	KIF14;GAS8
226	Spermatid Development (GO:0007286)	1/53	0.0592372	0.0909343	0	0	17.417	49.2239	NECTIN2
227	Actin Polymerization Or Depolymerization (GO:0008154)	1/53	0.0592372	0.0909343	0	0	17.417	49.2239	SVIL
228	Negative Regulation Of Viral Genome Replication (GO:0045071)	1/53	0.0592372	0.0909343	0	0	17.417	49.2239	SRPK2
229	Negative Regulation Of Protein Catabolic Process (GO:0042177)	1/54	0.060322	0.0921951	0	0	17.0875	47.9826	FLNA
230	Protein Localization (GO:0008104)	2/351	0.0609942	0.0928172	0	0	5.35626	14.9813	USP9X;FLNA
231	Neuron Migration (GO:0001764)	1/55	0.0614055	0.0930387	0	0	16.7702	46.7931	USP9X
232	Positive Regulation Of DNA-templated Transcription, Elongation (GO:0032786)	1/56	0.0624879	0.0942705	0	0	16.4645	45.6524	DDX39B
370	Spliceosomal snRNP Complex (GO:0097525)	1/57	0.063569	0.111246	0	0	16.1696	44.5575	DDX39B
527	Neurexins And Neuroligins R-HSA-6794361	1/57	0.063569	0.125087	0	0	16.1696	44.5575	SIPA1L1
233	Regulation Of Neuron Death (GO:1901214)	1/58	0.064649	0.0970664	0	0	15.8852	43.506	KIF14
528	Late SARS-CoV-2 Infection Events R-HSA-9772573	1/58	0.064649	0.125193	0	0	15.8852	43.506	SRPK2
234	Protein Modification By Small Protein Conjugation (GO:0032446)	2/364	0.0650195	0.0970664	0	0	5.16048	14.104	USP9X;RBBP6
235	Negative Regulation Of Protein-Containing Complex Assembly (GO:0031333)	1/59	0.0657278	0.0970664	0	0	15.6105	42.4954	KIF14
236	Positive Regulation Of Protein Binding (GO:0032092)	1/59	0.0657278	0.0970664	0	0	15.6105	42.4954	USP9X
237	Cilium Movement (GO:0003341)	1/59	0.0657278	0.0970664	0	0	15.6105	42.4954	GAS8
443	Notch signaling pathway	1/59	0.0657278	0.268568	0	0	15.6105	42.4954	NOTCH2
529	SARS-CoV Infections R-HSA-9679506	2/369	0.0665916	0.12694	0	0	5.08888	13.7867	SRPK2;TJP1
238	Homophilic Cell Adhesion Via Plasma Membrane Adhesion Molecules (GO:0007156)	1/60	0.0668054	0.0982432	0	0	15.3451	41.5235	NECTIN2
371	Sperm Flagellum (GO:0036126)	1/60	0.0668054	0.111342	0	0	15.3451	41.5235	GAS8
239	BMP Signaling Pathway (GO:0030509)	1/61	0.0678818	0.0989943	0	0	15.0886	40.5882	USP9X
240	Negative Regulation Of Viral Process (GO:0048525)	1/61	0.0678818	0.0989943	0	0	15.0886	40.5882	SRPK2
416	Protein Phosphatase Regulator Activity (GO:0019888)	1/61	0.0678818	0.1099	0	0	15.0886	40.5882	PPP6R3
417	PDZ Domain Binding (GO:0030165)	1/62	0.068957	0.1099	0	0	14.8405	39.6876	KIF14
530	Pre-NOTCH Transcription And Translation R-HSA-1912408	1/62	0.068957	0.129427	0	0	14.8405	39.6876	NOTCH2
372	Cortical Cytoskeleton (GO:0030863)	1/63	0.070031	0.111413	0	0	14.6004	38.8199	LASP1
531	Peroxisomal Protein Import R-HSA-9033241	1/63	0.070031	0.129451	0	0	14.6004	38.8199	USP9X
241	Positive Regulation Of Macroautophagy (GO:0016239)	1/64	0.0711039	0.103263	0	0	14.368	37.9833	GPSM1
242	Positive Regulation Of Cell Cycle (GO:0045787)	1/65	0.0721755	0.104386	0	0	14.1428	37.1764	SRPK2
243	Cellular Response To BMP Stimulus (GO:0071773)	1/66	0.073246	0.105498	0	0	13.9245	36.3976	USP9X
532	COPII-mediated Vesicle Transport R-HSA-204005	1/66	0.073246	0.133242	0	0	13.9245	36.3976	PPP6R3
244	Regulation Of Viral Genome Replication (GO:0045069)	1/67	0.0743153	0.1066	0	0	13.7128	35.6456	SRPK2
533	HDR Thru Homologous Recombination (HRR) R-HSA-5685942	1/67	0.0743153	0.133242	0	0	13.7128	35.6456	GEN1
534	Diseases Associated With O-glycosylation Of Proteins R-HSA-3906995	1/69	0.0764503	0.133242	0	0	13.3082	34.2168	NOTCH2
535	RHOB GTPase Cycle R-HSA-9013026	1/69	0.0764503	0.133242	0	0	13.3082	34.2168	TJP2
373	9+2 Motile Cilium (GO:0097729)	1/70	0.0775161	0.117697	0	0	13.1146	33.5376	GAS8
444	Epithelial cell signaling in Helicobacter pylori infection	1/70	0.0775161	0.268568	0	0	13.1146	33.5376	TJP1
245	Regulation Of Cilium Assembly (GO:1902017)	1/71	0.0785807	0.1109	0	0	12.9266	32.8805	USP6NL
246	Cell-Cell Junction Assembly (GO:0007043)	1/71	0.0785807	0.1109	0	0	12.9266	32.8805	TJP1
247	Regulation Of Hydrolase Activity (GO:0051336)	1/71	0.0785807	0.1109	0	0	12.9266	32.8805	SIPA1L1
248	Positive Regulation Of Cell-Substrate Adhesion (GO:0010811)	1/71	0.0785807	0.1109	0	0	12.9266	32.8805	FLNA
249	Transforming Growth Factor Beta Receptor Signaling Pathway (GO:0007179)	1/72	0.0796441	0.111057	0	0	12.7439	32.2445	USP9X
250	Positive Regulation Of Protein Localization To Nucleus (GO:1900182)	1/72	0.0796441	0.111057	0	0	12.7439	32.2445	FLNA
251	Negative Regulation Of Catabolic Process (GO:0009895)	1/72	0.0796441	0.111057	0	0	12.7439	32.2445	FLNA
374	Motile Cilium (GO:0031514)	1/73	0.0807063	0.117697	0	0	12.5663	31.6286	GAS8
418	Phosphatidylinositol-4,5-Bisphosphate Binding (GO:0005546)	1/73	0.0807063	0.124728	0	0	12.5663	31.6286	SVIL
536	RHOC GTPase Cycle R-HSA-9013106	1/73	0.0807063	0.138678	0	0	12.5663	31.6286	TJP2
252	Negative Regulation Of Neuron Apoptotic Process (GO:0043524)	1/74	0.0817674	0.1128	0	0	12.3935	31.0319	KIF14
253	Regulation Of Cell Cycle G1/S Phase Transition (GO:1902806)	1/74	0.0817674	0.1128	0	0	12.3935	31.0319	KIF14
254	Organelle Organization (GO:0006996)	2/418	0.0826563	0.1128	0	0	4.47825	11.1646	USP6NL;NECTIN2
255	Regulation Of Stress Fiber Assembly (GO:0051492)	1/75	0.0828273	0.1128	0	0	12.2254	30.4535	TJP1
256	Regulation Of DNA Replication (GO:0006275)	1/75	0.0828273	0.1128	0	0	12.2254	30.4535	RBBP6
257	Regulation Of Plasma Membrane Bounded Cell Projection Assembly (GO:0120032)	1/75	0.0828273	0.1128	0	0	12.2254	30.4535	USP6NL
537	Protein Ubiquitination R-HSA-8852135	1/76	0.083886	0.14214	0	0	12.0618	29.8928	USP9X
258	Actomyosin Structure Organization (GO:0031032)	1/77	0.0849435	0.115233	0	0	11.9025	29.3488	TJP1
375	Golgi Membrane (GO:0000139)	2/427	0.0857289	0.12002	0	0	4.3814	10.7632	GPSM1;NOTCH2
259	Proteolysis Involved In Protein Catabolic Process (GO:0051603)	1/78	0.0859999	0.116216	0	0	11.7473	28.821	USP9X
538	Pre-NOTCH Expression And Processing R-HSA-1912422	1/78	0.0859999	0.143523	0	0	11.7473	28.821	NOTCH2
539	Amyloid Fiber Formation R-HSA-977225	1/79	0.0870551	0.143523	0	0	11.5962	28.3087	USP9X
260	Regulation Of Organelle Assembly (GO:1902115)	1/80	0.0881092	0.1182	0	0	11.4488	27.8112	USP6NL
261	Protein Ubiquitination (GO:0016567)	2/434	0.0881432	0.1182	0	0	4.30886	10.4653	USP9X;RBBP6
262	Spindle Assembly (GO:0051225)	1/81	0.0891621	0.118657	0	0	11.3051	27.3278	FLNA
263	Activation Of Protein Kinase Activity (GO:0032147)	1/81	0.0891621	0.118657	0	0	11.3051	27.3278	KIF14
540	Signaling By NOTCH4 R-HSA-9013694	1/81	0.0891621	0.145037	0	0	11.3051	27.3278	NOTCH2
264	Calcium Ion Transmembrane Import Into Cytosol (GO:0097553)	1/83	0.0912643	0.120994	0	0	11.0283	26.4016	FLNA
541	Antiviral Mechanism By IFN-stimulated Genes R-HSA-1169410	1/83	0.0912643	0.146503	0	0	11.0283	26.4016	FLNA
265	Mitotic Spindle Organization (GO:0007052)	1/85	0.093362	0.122845	0	0	10.7646	25.5258	FLNA
266	Positive Regulation Of Protein Localization (GO:1903829)	1/85	0.093362	0.122845	0	0	10.7646	25.5258	GAS8
419	Protein Tyrosine Kinase Binding (GO:1990782)	1/85	0.093362	0.140043	0	0	10.7646	25.5258	TJP2
542	Hedgehog On State R-HSA-5632684	1/85	0.093362	0.147924	0	0	10.7646	25.5258	GAS8
267	Regulation Of Mitotic Cell Cycle Phase Transition (GO:1901990)	1/86	0.0944091	0.123757	0	0	10.6374	25.1056	KIF14
268	Negative Regulation Of Neuron Death (GO:1901215)	1/88	0.0964998	0.126026	0	0	10.3918	24.2984	KIF14
445	Gap junction	1/88	0.0964998	0.268568	0	0	10.3918	24.2984	TJP1
543	Protein-protein Interactions At Synapses R-HSA-6794362	1/88	0.0964998	0.150936	0	0	10.3918	24.2984	SIPA1L1
269	Regulation Of Actin Cytoskeleton Organization (GO:0032956)	1/91	0.0996271	0.129626	0	0	10.0439	23.1645	NOTCH2
446	Th1 and Th2 cell differentiation	1/92	0.100667	0.268568	0	0	9.93307	22.8057	NOTCH2
544	Telomere Maintenance R-HSA-157579	1/92	0.100667	0.155461	0	0	9.93307	22.8057	PPP6R3
420	Phosphatidylinositol Bisphosphate Binding (GO:1902936)	1/93	0.101706	0.145992	0	0	9.8246	22.4558	SVIL
421	Purine Ribonucleoside Triphosphate Binding (GO:0035639)	2/476	0.103053	0.145992	0	0	3.91863	8.90512	SRPK2;KIF14
270	Cell Junction Assembly (GO:0034329)	1/95	0.103781	0.134034	0	0	9.6146	21.7816	TJP1
271	Recombinational Repair (GO:0000725)	1/95	0.103781	0.134034	0	0	9.6146	21.7816	GEN1
272	Cellular Response To Transforming Growth Factor Beta Stimulus (GO:0071560)	1/96	0.104816	0.13438	0	0	9.51292	21.4568	USP9X
273	Regulation Of Macroautophagy (GO:0016241)	1/96	0.104816	0.13438	0	0	9.51292	21.4568	GPSM1
422	Cysteine-Type Deubiquitinase Activity (GO:0004843)	1/98	0.106884	0.147327	0	0	9.31584	20.8303	USP9X
447	mRNA surveillance pathway	1/98	0.106884	0.268568	0	0	9.31584	20.8303	DDX39B
376	trans-Golgi Network Membrane (GO:0032588)	1/100	0.108947	0.14666	0	0	9.12672	20.2329	USP6NL
274	Hemopoiesis (GO:0030097)	1/101	0.109977	0.140482	0	0	9.035	19.9446	NOTCH2
448	Herpes simplex virus 1 infection	2/498	0.111131	0.268568	0	0	3.74059	8.21823	SRSF3;NECTIN2
275	Regulation Of G1/S Transition Of Mitotic Cell Cycle (GO:2000045)	1/106	0.115109	0.146503	0	0	8.6026	18.5977	KIF14
423	Cysteine-Type Endopeptidase Activity (GO:0004197)	1/106	0.115109	0.154489	0	0	8.6026	18.5977	USP9X
276	Monoatomic Ion Transport (GO:0006811)	1/107	0.116132	0.146738	0	0	8.52101	18.3459	LASP1
277	Positive Regulation Of Autophagy (GO:0010508)	1/107	0.116132	0.146738	0	0	8.52101	18.3459	GPSM1
278	Positive Regulation Of DNA Metabolic Process (GO:0051054)	1/108	0.117154	0.147496	0	0	8.44095	18.0996	USP9X
279	Regulation Of Proteasomal Ubiquitin-Dependent Protein Catabolic Process (GO:0032434)	1/109	0.118175	0.148248	0	0	8.36237	17.8586	USP9X
424	Metal Ion Binding (GO:0046872)	2/521	0.119756	0.155865	0	0	3.5706	7.57789	GEN1;SRPK2
280	RNA Metabolic Process (GO:0016070)	1/111	0.120213	0.149201	0	0	8.2095	17.3917	DDX39B
281	Cytoskeleton Organization (GO:0007010)	1/111	0.120213	0.149201	0	0	8.2095	17.3917	NECTIN2
282	Double-Strand Break Repair Via Homologous Recombination (GO:0000724)	1/111	0.120213	0.149201	0	0	8.2095	17.3917	GEN1
283	Protein Deubiquitination (GO:0016579)	1/112	0.121231	0.149932	0	0	8.13514	17.1656	USP9X
425	Deubiquitinase Activity (GO:0101005)	1/113	0.122247	0.155865	0	0	8.06209	16.9442	USP9X
284	Regulation Of Cytoskeleton Organization (GO:0051493)	1/114	0.123262	0.151375	0	0	7.99035	16.7273	TJP1
285	Protein Modification By Small Protein Removal (GO:0070646)	1/114	0.123262	0.151375	0	0	7.99035	16.7273	USP9X
449	Leukocyte transendothelial migration	1/114	0.123262	0.269983	0	0	7.99035	16.7273	AFDN
545	HDR Thru Homologous Recombination (HRR) Or Single Strand Annealing (SSA) R-HSA-5693567	1/114	0.123262	0.187975	0	0	7.99035	16.7273	GEN1
546	Chromosome Maintenance R-HSA-73886	1/118	0.127312	0.190917	0	0	7.71562	15.9028	PPP6R3
286	Positive Regulation Of Angiogenesis (GO:0045766)	1/119	0.128321	0.157036	0	0	7.64985	15.7068	TJP1
547	Homology Directed Repair R-HSA-5693538	1/119	0.128321	0.190917	0	0	7.64985	15.7068	GEN1
450	Thyroid hormone signaling pathway	1/121	0.130337	0.269983	0	0	7.52159	15.3262	NOTCH2
287	Regulation Of Protein Catabolic Process (GO:0042176)	1/122	0.131343	0.160174	0	0	7.45905	15.1415	FLNA
288	Positive Regulation Of Epithelial Cell Proliferation (GO:0050679)	1/123	0.132348	0.16084	0	0	7.39754	14.9602	NOTCH2
548	Immunoregulatory Interactions Between A Lymphoid And A non-Lymphoid Cell R-HSA-198933	1/123	0.132348	0.194536	0	0	7.39754	14.9602	NECTIN2
289	Regulation Of DNA Metabolic Process (GO:0051052)	1/124	0.133352	0.160942	0	0	7.33703	14.7824	RBBP6
290	Neuron Projection Guidance (GO:0097485)	1/124	0.133352	0.160942	0	0	7.33703	14.7824	NOTCH2
549	Platelet Degranulation R-HSA-114608	1/125	0.134355	0.195135	0	0	7.27749	14.6079	FLNA
291	Positive Regulation Of Intracellular Protein Transport (GO:0090316)	1/126	0.135357	0.1628	0	0	7.21891	14.4367	FLNA
292	Regulation Of Anatomical Structure Morphogenesis (GO:0022603)	1/127	0.136357	0.163442	0	0	7.16126	14.2686	SIPA1L1
293	Regulation Of Gene Expression (GO:0010468)	3/1127	0.137032	0.16369	0	0	2.51597	5.0006	NOTCH2;SRPK2;ZNF507
294	Golgi Organization (GO:0007030)	1/130	0.139353	0.165334	0	0	6.99366	13.7827	USP6NL
295	Transmembrane Receptor Protein Serine/Threonine Kinase Signaling Pathway (GO:0007178)	1/130	0.139353	0.165334	0	0	6.99366	13.7827	USP9X
550	Response To Elevated Platelet Cytosolic Ca2+ R-HSA-76005	1/130	0.139353	0.200012	0	0	6.99366	13.7827	FLNA
377	Asymmetric Synapse (GO:0032279)	1/133	0.142338	0.184512	0	0	6.83368	13.3226	SIPA1L1
551	ER To Golgi Anterograde Transport R-HSA-199977	1/133	0.142338	0.201921	0	0	6.83368	13.3226	PPP6R3
552	Signaling By Hedgehog R-HSA-5358351	1/135	0.144323	0.202384	0	0	6.731	13.0292	GAS8
296	Protein Localization To Plasma Membrane (GO:0072659)	1/137	0.146303	0.172993	0	0	6.63135	12.746	FLNA
426	G Protein-Coupled Receptor Binding (GO:0001664)	1/140	0.149265	0.185671	0	0	6.48725	12.3389	FLNA
297	Protein Localization To Cell Periphery (GO:1990778)	1/142	0.151235	0.178223	0	0	6.39458	12.0789	FLNA
553	Diseases Of Glycosylation R-HSA-3781865	1/143	0.152218	0.211029	0	0	6.34923	11.9521	NOTCH2
298	Regulation Of Cell Adhesion (GO:0030155)	1/144	0.1532	0.179933	0	0	6.30451	11.8273	KIF14
427	Cysteine-Type Peptidase Activity (GO:0008234)	1/144	0.1532	0.186028	0	0	6.30451	11.8273	USP9X
554	Generic Transcription Pathway R-HSA-212436	3/1190	0.154059	0.211182	0	0	2.37447	4.44126	NOTCH2;TJP1;USP9X
299	Positive Regulation Of Protein Kinase Activity (GO:0045860)	1/145	0.154181	0.180479	0	0	6.26042	11.7047	KIF14
300	Negative Regulation Of Protein Metabolic Process (GO:0051248)	1/147	0.156139	0.182162	0	0	6.17403	11.4652	FLNA
451	Breast cancer	1/147	0.156139	0.284774	0	0	6.17403	11.4652	NOTCH2
555	RHOA GTPase Cycle R-HSA-8980692	1/147	0.156139	0.211655	0	0	6.17403	11.4652	TJP2
452	Cell adhesion molecules	1/148	0.157117	0.284774	0	0	6.13173	11.3484	NECTIN2
301	Negative Regulation Of DNA-binding Transcription Factor Activity (GO:0043433)	1/149	0.158093	0.183221	0	0	6.08999	11.2334	FLNA
302	Axon Guidance (GO:0007411)	1/149	0.158093	0.183221	0	0	6.08999	11.2334	NOTCH2
556	DNA Double-Strand Break Repair R-HSA-5693532	1/149	0.158093	0.211949	0	0	6.08999	11.2334	GEN1
378	Postsynaptic Density (GO:0014069)	1/151	0.160043	0.200054	0	0	6.00818	11.0089	SIPA1L1
303	Peptidyl-Serine Phosphorylation (GO:0018105)	1/158	0.166834	0.192712	0	0	5.73827	10.2759	SRPK2
304	Regulation Of Macromolecule Metabolic Process (GO:0060255)	1/162	0.17069	0.196518	0	0	5.59458	9.89068	ZNF507
557	Protein Localization R-HSA-9609507	1/164	0.172612	0.226437	0	0	5.52538	9.70647	USP9X
558	Transport To Golgi And Subsequent Modification R-HSA-948021	1/164	0.172612	0.226437	0	0	5.52538	9.70647	PPP6R3
305	Peptidyl-Serine Modification (GO:0018209)	1/166	0.17453	0.20028	0	0	5.45785	9.52755	SRPK2
428	Protein Homodimerization Activity (GO:0042803)	2/662	0.175827	0.208539	0	0	2.78745	4.84529	GEN1;FLNA
306	Double-Strand Break Repair (GO:0006302)	1/168	0.176443	0.201814	0	0	5.39194	9.35371	GEN1
559	Metabolism Of RNA R-HSA-8953854	2/666	0.177482	0.230348	0	0	2.77008	4.78916	DDX39B;SRSF3
379	Basolateral Plasma Membrane (GO:0016323)	1/171	0.179305	0.216403	0	0	5.29599	9.10203	TJP1
307	Cell-Cell Adhesion Via Plasma-Membrane Adhesion Molecules (GO:0098742)	1/172	0.180257	0.204838	0	0	5.26475	9.02047	NECTIN2
308	Generation Of Neurons (GO:0048699)	1/172	0.180257	0.204838	0	0	5.26475	9.02047	USP9X
309	Regulation Of Neuron Projection Development (GO:0010975)	1/174	0.182158	0.206328	0	0	5.20336	8.86071	SIPA1L1
310	Positive Regulation Of I-kappaB kinase/NF-kappaB Signaling (GO:0043123)	1/175	0.183107	0.206733	0	0	5.1732	8.78246	FLNA
311	Positive Regulation Of Hydrolase Activity (GO:0051345)	1/176	0.184054	0.207135	0	0	5.14338	8.70529	USP6NL
312	Positive Regulation Of ERK1 And ERK2 Cascade (GO:0070374)	1/179	0.186891	0.209654	0	0	5.05592	8.47994	NOTCH2
560	Intra-Golgi And Retrograde Golgi-to-ER Traffic R-HSA-6811442	1/181	0.188777	0.239905	0	0	4.99924	8.33467	USP6NL
561	mRNA Splicing - Major Pathway R-HSA-72163	1/181	0.188777	0.239905	0	0	4.99924	8.33467	SRSF3
429	Actin Binding (GO:0003779)	1/183	0.190659	0.220991	0	0	4.94381	8.19321	CGN
313	Negative Regulation Of Macromolecule Metabolic Process (GO:0010605)	1/186	0.193474	0.216345	0	0	4.8629	7.98786	NOTCH2
453	RNA transport	1/186	0.193474	0.302649	0	0	4.8629	7.98786	DDX39B
562	mRNA Splicing R-HSA-72172	1/189	0.19628	0.246867	0	0	4.78457	7.79032	SRSF3
314	Protein Localization To Membrane (GO:0072657)	1/192	0.199076	0.221195	0	0	4.70871	7.60019	FLNA
315	Modification-Dependent Protein Catabolic Process (GO:0019941)	1/192	0.199076	0.221195	0	0	4.70871	7.60019	RBBP6
316	Endomembrane System Organization (GO:0010256)	1/196	0.202789	0.224609	0	0	4.61119	7.35755	USP6NL
563	SARS-CoV-2-host Interactions R-HSA-9705683	1/196	0.202789	0.248936	0	0	4.61119	7.35755	TJP1
454	Pathogenic Escherichia coli infection	1/197	0.203715	0.302649	0	0	4.58743	7.29875	TJP1
564	Adaptive Immune System R-HSA-1280218	2/733	0.205557	0.248936	0	0	2.50746	3.96688	RBBP6;NECTIN2
565	Interferon Signaling R-HSA-913531	1/200	0.206487	0.248936	0	0	4.51759	7.12658	FLNA
455	Focal adhesion	1/201	0.207409	0.302649	0	0	4.49477	7.07057	FLNA
566	Ub-specific Processing Proteases R-HSA-5689880	1/201	0.207409	0.248936	0	0	4.49477	7.07057	USP9X
567	Signaling By NOTCH R-HSA-157118	1/203	0.209249	0.248936	0	0	4.44982	6.96054	NOTCH2
568	Transcriptional Regulation By RUNX1 R-HSA-8878171	1/204	0.210168	0.248936	0	0	4.42768	6.90651	TJP1
456	Proteoglycans in cancer	1/205	0.211085	0.302649	0	0	4.40575	6.85311	FLNA
457	cAMP signaling pathway	1/216	0.221113	0.302649	0	0	4.17801	6.30497	AFDN
380	Nucleolus (GO:0005730)	2/771	0.221728	0.250611	0	0	2.37885	3.58327	SRPK2;FLNA
317	Proteasomal Protein Catabolic Process (GO:0010498)	1/220	0.224729	0.248123	0	0	4.10087	6.12204	KIF14
381	Nuclear Lumen (GO:0031981)	2/780	0.225578	0.250611	0	0	2.35023	3.4997	SRPK2;FLNA
318	Positive Regulation Of Cell Motility (GO:2000147)	1/221	0.22563	0.248335	0	0	4.08202	6.07756	TJP1
319	Regulation Of Cell Growth (GO:0001558)	1/227	0.231018	0.252079	0	0	3.97245	5.82067	KIF14
320	Chromatin Remodeling (GO:0006338)	1/228	0.231912	0.252079	0	0	3.95475	5.77945	SRPK2
321	Cilium Organization (GO:0044782)	1/228	0.231912	0.252079	0	0	3.95475	5.77945	FLNA
322	Apoptotic Process (GO:0006915)	1/228	0.231912	0.252079	0	0	3.95475	5.77945	NOTCH2
382	Endoplasmic Reticulum Membrane (GO:0005789)	2/801	0.234586	0.250611	0	0	2.28595	3.31448	GPSM1;NOTCH2
323	Regulation Of I-kappaB kinase/NF-kappaB Signaling (GO:0043122)	1/232	0.23548	0.255164	0	0	3.88548	5.6189	FLNA
458	Ras signaling pathway	1/232	0.23548	0.302649	0	0	3.88548	5.6189	AFDN
459	Chemical carcinogenesis	1/239	0.241686	0.302649	0	0	3.76986	5.35364	NOTCH2
383	Bounding Membrane Of Organelle (GO:0098588)	2/819	0.242331	0.250611	0	0	2.23349	3.16586	GPSM1;NOTCH2
430	Ubiquitin-Like Protein Transferase Activity (GO:0019787)	1/240	0.242569	0.274911	0	0	3.7539	5.31729	RBBP6
384	trans-Golgi Network (GO:0005802)	1/241	0.24345	0.250611	0	0	3.73807	5.2813	USP6NL
324	Regulation Of ERK1 And ERK2 Cascade (GO:0070372)	1/244	0.246089	0.265837	0	0	3.69136	5.17551	NOTCH2
569	Diseases Of Metabolism R-HSA-5668914	1/247	0.24872	0.291767	0	0	3.64579	5.07286	NOTCH2
460	Salmonella infection	1/249	0.250468	0.302649	0	0	3.61602	5.0061	FLNA
570	Platelet Activation, Signaling And Aggregation R-HSA-76002	1/254	0.254823	0.29608	0	0	3.54366	4.84485	FLNA
325	Cellular Component Assembly (GO:0022607)	1/260	0.260016	0.280017	0	0	3.46051	4.66135	GAS8
326	Positive Regulation Of Apoptotic Process (GO:0043065)	1/270	0.268595	0.288369	0	0	3.33018	4.37769	SRPK2
327	Positive Regulation Of Cell Migration (GO:0030335)	1/272	0.270299	0.289311	0	0	3.30527	4.32404	TJP1
328	Plasma Membrane Bounded Cell Projection Assembly (GO:0120031)	1/275	0.272848	0.291149	0	0	3.26858	4.24536	FLNA
571	Deubiquitination R-HSA-5688426	1/279	0.276234	0.317843	0	0	3.2209	4.1437	USP9X
431	DNA-binding Transcription Factor Binding (GO:0140297)	1/282	0.278764	0.309064	0	0	3.18602	4.0698	FLNA
572	Asparagine N-linked Glycosylation R-HSA-446203	1/282	0.278764	0.317843	0	0	3.18602	4.0698	PPP6R3
329	Transmembrane Receptor Protein Tyrosine Kinase Signaling Pathway (GO:0007169)	1/284	0.280445	0.298346	0	0	3.16319	4.0216	SIPA1L1
330	DNA Metabolic Process (GO:0006259)	1/288	0.283797	0.300997	0	0	3.11847	3.92769	GEN1
461	MAPK signaling pathway	1/294	0.288797	0.335005	0	0	3.05368	3.79276	FLNA
331	Regulation Of Cell Cycle (GO:0051726)	1/298	0.292112	0.30888	0	0	3.01194	3.70654	SRPK2
573	Antigen Processing: Ubiquitination And Proteasome Degradation R-HSA-983168	1/307	0.299516	0.333862	0	0	2.92201	3.52274	RBBP6
332	Positive Regulation Of MAPK Cascade (GO:0043410)	1/310	0.301968	0.31834	0	0	2.8932	3.46442	NOTCH2
462	MicroRNAs in cancer	1/310	0.301968	0.33681	0	0	2.8932	3.46442	NOTCH2
574	DNA Repair R-HSA-73894	1/310	0.301968	0.333862	0	0	2.8932	3.46442	GEN1
432	Ubiquitin Protein Ligase Activity (GO:0061630)	1/311	0.302783	0.328552	0	0	2.88372	3.44529	RBBP6
575	G Alpha (I) Signaling Events R-HSA-418594	1/312	0.303598	0.333862	0	0	2.87431	3.42632	GPSM1
576	Infectious Disease R-HSA-5663205	2/961	0.30376	0.333862	0	0	1.88867	2.25039	SRPK2;TJP1
333	Proteasome-Mediated Ubiquitin-Dependent Protein Catabolic Process (GO:0043161)	1/319	0.309274	0.325062	0	0	2.81003	3.29766	KIF14
433	Ubiquitin-Like Protein Ligase Activity (GO:0061659)	1/319	0.309274	0.328603	0	0	2.81003	3.29766	RBBP6
334	Organelle Assembly (GO:0070925)	1/322	0.311693	0.326624	0	0	2.78335	3.24465	FLNA
463	Human papillomavirus infection	1/331	0.318901	0.342523	0	0	2.7062	3.09285	NOTCH2
434	Endopeptidase Activity (GO:0004175)	1/335	0.322081	0.334165	0	0	2.67324	3.02866	USP9X
577	Disease R-HSA-1643685	3/1736	0.322102	0.350861	0	0	1.57911	1.78895	NOTCH2;SRPK2;TJP1
335	Negative Regulation Of Gene Expression (GO:0010629)	1/336	0.322874	0.337331	0	0	2.66513	3.01291	NOTCH2
435	Protein Serine/Threonine Kinase Activity (GO:0004674)	1/342	0.327613	0.334165	0	0	2.61744	2.92086	SRPK2
336	Negative Regulation Of DNA-templated Transcription (GO:0045892)	2/1025	0.331361	0.345168	0	0	1.76456	1.94904	USP9X;FLNA
337	Positive Regulation Of Macromolecule Metabolic Process (GO:0010604)	1/364	0.344718	0.358016	0	0	2.45605	2.61576	SRPK2
464	Amyotrophic lateral sclerosis	1/364	0.344718	0.35703	0	0	2.45605	2.61576	SRSF3
578	Class I MHC Mediated Antigen Processing And Presentation R-HSA-983169	1/378	0.355386	0.383691	0	0	2.36315	2.4448	RBBP6
338	Negative Regulation Of Cell Population Proliferation (GO:0008285)	1/379	0.356141	0.368786	0	0	2.35678	2.43321	GAS8
339	DNA Damage Response (GO:0006974)	1/384	0.359907	0.371585	0	0	2.32542	2.37637	RBBP6
579	Neuronal System R-HSA-112316	1/386	0.361407	0.386769	0	0	2.31311	2.35416	SIPA1L1
340	Vesicle-Mediated Transport (GO:0016192)	1/411	0.379878	0.391051	0	0	2.16929	2.09967	USP6NL
436	Ubiquitin-Protein Transferase Activity (GO:0004842)	1/412	0.380606	0.380606	0	0	2.1639	2.09031	RBBP6
580	Immune System R-HSA-168256	3/1943	0.389603	0.413318	0	0	1.39461	1.3146	FLNA;RBBP6;NECTIN2
341	Phosphorylation (GO:0016310)	1/429	0.392859	0.403228	0	0	2.07615	1.93975	SRPK2
342	Nervous System Development (GO:0007399)	1/433	0.395708	0.404965	0	0	2.0565	1.90654	NOTCH2
385	Intracellular Non-Membrane-Bounded Organelle (GO:0043232)	2/1195	0.403289	0.403289	0	0	1.49954	1.36173	SRPK2;FLNA
343	Positive Regulation Of Gene Expression (GO:0010628)	1/480	0.428244	0.436983	0	0	1.85026	1.56913	SRPK2
344	Protein Phosphorylation (GO:0006468)	1/500	0.441574	0.449276	0	0	1.77428	1.45031	SRPK2
345	Positive Regulation Of Intracellular Signal Transduction (GO:1902533)	1/525	0.457819	0.464454	0	0	1.68746	1.31838	FLNA
465	Pathways in cancer	1/531	0.46165	0.46165	0	0	1.66784	1.28915	NOTCH2
346	Negative Regulation Of Cellular Process (GO:0048523)	1/537	0.465455	0.470836	0	0	1.64866	1.26079	GAS8
581	Post-translational Protein Modification R-HSA-597592	2/1383	0.478932	0.503704	0	0	1.28244	0.944127	USP9X;PPP6R3
582	Hemostasis R-HSA-109582	1/576	0.489569	0.510491	0	0	1.53375	1.09545	FLNA
583	GPCR Downstream Signaling R-HSA-388396	1/619	0.514949	0.532405	0	0	1.42387	0.945007	GPSM1
584	Cell Cycle R-HSA-1640170	1/654	0.534712	0.548192	0	0	1.34512	0.842082	PPP6R3
585	Signaling By GPCR R-HSA-372790	1/689	0.553703	0.562931	0	0	1.27438	0.75332	GPSM1
586	Cytokine Signaling In Immune System R-HSA-1280215	1/702	0.560566	0.565199	0	0	1.2499	0.723454	FLNA
347	Protein Modification Process (GO:0036211)	1/711	0.565258	0.570145	0	0	1.23348	0.703669	SRPK2
348	Negative Regulation Of Transcription By RNA Polymerase II (GO:0000122)	1/763	0.591444	0.594843	0	0	1.14621	0.601974	USP9X
587	Metabolism Of Proteins R-HSA-392499	2/1890	0.653458	0.653458	0	0	0.91248	0.388239	USP9X;PPP6R3
349	Positive Regulation Of DNA-templated Transcription (GO:0045893)	1/1243	0.771595	0.773806	0	0	0.685661	0.177789	DDX39B
350	Regulation Of Transcription By RNA Polymerase II (GO:0006357)	1/2028	0.914609	0.914609	0	0	0.402521	0.0359286	USP9X

## Sheet: Cluster6
	Term	Overlap	P.value	Adjusted.P.value	Old.P.value	Old.Adjusted.P.value	Odds.Ratio	Combined.Score	Genes
1	Negative Regulation Of Translation (GO:0017148)	6/107	3.58476e-10	5.77146e-08	0	0	98.4208	2140.57	FXR1;CNOT1;AGO2;CNOT10;TNRC6A;TNRC6B
2	miRNA-mediated Gene Silencing (GO:0035195)	4/26	6.77886e-09	5.45698e-07	0	0	259.221	4875.8	CNOT1;AGO2;TNRC6A;TNRC6B
270	Post-transcriptional Silencing By Small RNAs R-HSA-426496	3/7	2.13719e-08	4.68044e-06	0	0	998.9	17641.8	AGO2;TNRC6A;TNRC6B
3	Positive Regulation Of mRNA Catabolic Process (GO:0061014)	4/45	6.68464e-08	3.58742e-06	0	0	138.962	2295.77	FXR1;CNOT1;TNRC6A;TNRC6B
271	Competing Endogenous RNAs (ceRNAs) Regulate PTEN Translation R-HSA-8948700	3/10	7.31528e-08	7.33862e-06	0	0	570.714	9377.24	AGO2;TNRC6A;TNRC6B
272	Regulation Of PTEN mRNA Translation R-HSA-8943723	3/11	1.00529e-07	7.33862e-06	0	0	499.35	8045.94	AGO2;TNRC6A;TNRC6B
4	Positive Regulation Of Nuclear-Transcribed mRNA poly(A) Tail Shortening (GO:0060213)	3/12	1.33964e-07	5.39205e-06	0	0	443.844	7024.15	CNOT1;TNRC6A;TNRC6B
5	miRNA-mediated Gene Silencing By Inhibition Of Translation (GO:0035278)	3/14	2.21402e-07	5.94094e-06	0	0	363.109	5564.02	AGO2;TNRC6A;TNRC6B
6	Regulation Of Nuclear-Transcribed mRNA poly(A) Tail Shortening (GO:0060211)	3/14	2.21402e-07	5.94094e-06	0	0	363.109	5564.02	CNOT1;TNRC6A;TNRC6B
273	Regulation Of RUNX1 Expression And Activity R-HSA-8934593	3/17	4.12913e-07	2.0024e-05	0	0	285.257	4193.29	AGO2;TNRC6A;TNRC6B
274	Transcriptional Regulation By TP53 R-HSA-3700989	6/354	4.5717e-07	2.0024e-05	0	0	28.2098	411.812	CNOT1;CNOT11;AGO2;CNOT10;TNRC6A;TNRC6B
7	ncRNA-mediated Post-Transcriptional Gene Silencing (GO:0035194)	3/18	4.95219e-07	1.139e-05	0	0	266.227	3865.15	CNOT1;TNRC6A;TNRC6B
275	TP53 Regulates Transcription Of Additional Cell Cycle Genes With Uncertain Roles In P53 Pathway R-HSA-6804115	3/21	8.05801e-07	2.94118e-05	0	0	221.822	3112.48	CNOT1;CNOT11;CNOT10
162	P-body (GO:0000932)	4/83	8.07089e-07	1.61418e-05	0	0	71.9819	1009.89	CNOT1;UBAP2;TNRC6A;TNRC6B
276	Deadenylation Of mRNA R-HSA-429947	3/25	1.39037e-06	4.34987e-05	0	0	181.455	2447.09	CNOT1;CNOT11;CNOT10
277	Regulation Of MECP2 Expression And Activity R-HSA-9022692	3/31	2.70813e-06	7.41349e-05	0	0	142.529	1827.11	AGO2;TNRC6A;TNRC6B
278	NR1H3 And NR1H2 Regulate Gene Expression Linked To Cholesterol Transport And Efflux R-HSA-9029569	3/36	4.28961e-06	0.00010438	0	0	120.903	1494.28	AGO2;TNRC6A;TNRC6B
8	mRNA Destabilization (GO:0061157)	3/43	7.38519e-06	0.000148627	0	0	99.71	1178.18	FXR1;CNOT1;AGO2
279	NR1H2 And NR1H3-mediated Signaling R-HSA-9024446	3/46	9.06882e-06	0.000198607	0	0	92.7395	1076.77	AGO2;TNRC6A;TNRC6B
9	Negative Regulation Of Gene Expression (GO:0010629)	5/336	9.29769e-06	0.000166325	0	0	22.8341	264.55	FXR1;CNOT1;AGO2;CNOT10;TNRC6B
280	TP53 Regulates Transcription Of Cell Cycle Genes R-HSA-6791312	3/49	1.09883e-05	0.000218767	0	0	86.6783	989.751	CNOT1;CNOT11;CNOT10
182	RNA Binding (GO:0003723)	8/1411	1.38772e-05	0.000499579	0	0	10.5939	118.495	FXR1;CNOT1;AGO2;UBAP2;ELAVL1;DZIP3;TNRC6A;TNRC6B
281	Deadenylation-dependent mRNA Decay R-HSA-429914	3/56	1.64676e-05	0.000300534	0	0	75.2038	828.303	CNOT1;CNOT11;CNOT10
282	Transcriptional Regulation By MECP2 R-HSA-8986944	3/60	2.02834e-05	0.000326924	0	0	69.9123	755.452	AGO2;TNRC6A;TNRC6B
283	Ca2+ Pathway R-HSA-4086398	3/61	2.13205e-05	0.000326924	0	0	68.7034	738.963	AGO2;TNRC6A;TNRC6B
284	Pre-NOTCH Transcription And Translation R-HSA-1912408	3/62	2.2392e-05	0.000326924	0	0	67.5356	723.09	AGO2;TNRC6A;TNRC6B
10	Regulation Of Translation (GO:0006417)	4/202	2.76615e-05	0.00044535	0	0	28.5483	299.628	FXR1;CNOT1;CNOT10;ELAVL1
285	Pre-NOTCH Expression And Processing R-HSA-1912422	3/78	4.46387e-05	0.000610993	0	0	53.0853	531.751	AGO2;TNRC6A;TNRC6B
286	TP53 Regulates Metabolic Genes R-HSA-5628897	3/81	4.99784e-05	0.000643839	0	0	51.0359	505.455	AGO2;TNRC6A;TNRC6B
11	Positive Regulation Of Amide Metabolic Process (GO:0034250)	3/85	5.7727e-05	0.000774504	0	0	48.5366	473.707	FXR1;AGO2;ELAVL1
12	Nuclear-Transcribed mRNA Catabolic Process (GO:0000956)	3/85	5.7727e-05	0.000774504	0	0	48.5366	473.707	CNOT1;CNOT11;CNOT10
163	RISC Complex (GO:0016442)	2/13	5.93212e-05	0.000593212	0	0	226.943	2208.73	AGO2;TNRC6A
287	MAPK6/MAPK4 Signaling R-HSA-5687128	3/90	6.84694e-05	0.000833044	0	0	45.7356	438.565	AGO2;TNRC6A;TNRC6B
13	Positive Regulation Of Nuclear-Transcribed mRNA Catabolic Process, Deadenylation-Dependent Decay (GO:1900153)	2/14	6.91712e-05	0.000856203	0	0	208.021	1992.62	CNOT1;TNRC6B
14	Negative Regulation Of Amide Metabolic Process (GO:0034249)	3/93	7.55024e-05	0.000856203	0	0	44.2044	419.56	FXR1;CNOT1;CNOT10
15	Regulation Of miRNA-mediated Gene Silencing (GO:0060964)	2/15	7.97705e-05	0.000856203	0	0	192.01	1811.87	FXR1;ELAVL1
288	PIP3 Activates AKT Signaling R-HSA-1257604	4/268	8.31951e-05	0.000958933	0	0	21.3398	200.473	AGO2;SOS1;TNRC6A;TNRC6B
16	Negative Regulation Of Macromolecule Biosynthetic Process (GO:0010558)	3/98	8.82462e-05	0.000887977	0	0	41.8674	390.848	FXR1;CNOT1;CNOT10
289	Gene Silencing By RNA R-HSA-211000	3/108	0.000117787	0.00128977	0	0	37.861	342.514	AGO2;TNRC6A;TNRC6B
290	Intracellular Signaling By Second Messengers R-HSA-9006925	4/306	0.000138794	0.00144742	0	0	18.6187	165.381	AGO2;SOS1;TNRC6A;TNRC6B
17	Nuclear-Transcribed mRNA poly(A) Tail Shortening (GO:0000289)	2/20	0.000143963	0.00136341	0	0	138.639	1226.39	CNOT11;CNOT10
291	Estrogen-dependent Gene Expression R-HSA-9018519	3/119	0.000157004	0.00153214	0	0	34.2517	300.019	AGO2;TNRC6A;TNRC6B
292	MAPK Family Signaling Cascades R-HSA-5683057	4/318	0.00016091	0.00153214	0	0	17.8963	156.318	AGO2;SOS1;TNRC6A;TNRC6B
18	Positive Regulation Of Macromolecule Biosynthetic Process (GO:0010557)	3/122	0.000169001	0.00151162	0	0	33.3832	289.953	FXR1;AGO2;ELAVL1
19	Regulation Of Nuclear-Transcribed mRNA Catabolic Process, Deadenylation-Dependent Decay (GO:1900151)	2/23	0.000191392	0.0016218	0	0	118.815	1017.2	CNOT1;TNRC6B
183	mRNA 3'-UTR AU-rich Region Binding (GO:0035925)	2/23	0.000191392	0.00344506	0	0	118.815	1017.2	FXR1;ELAVL1
20	Negative Regulation Of Cellular Biosynthetic Process (GO:0031327)	3/137	0.000237952	0.00191552	0	0	29.6239	247.165	FXR1;CNOT1;CNOT10
293	PTEN Regulation R-HSA-6807070	3/139	0.000248326	0.00226598	0	0	29.1853	242.26	AGO2;TNRC6A;TNRC6B
294	Beta-catenin Independent WNT Signaling R-HSA-3858494	3/142	0.00026443	0.0023164	0	0	28.5511	235.202	AGO2;TNRC6A;TNRC6B
21	Negative Regulation Of Protein Metabolic Process (GO:0051248)	3/147	0.000292746	0.00214309	0	0	27.5528	224.175	FXR1;CNOT1;CNOT10
22	RNA-mediated Gene Silencing (GO:0031047)	2/29	0.000306155	0.00214309	0	0	92.3843	747.52	AGO2;TNRC6B
23	Negative Regulation Of Plasma Membrane Bounded Cell Projection Assembly (GO:0120033)	2/29	0.000306155	0.00214309	0	0	92.3843	747.52	MPHOSPH9;CAPZB
184	miRNA Binding (GO:0035198)	2/29	0.000306155	0.00367386	0	0	92.3843	747.52	AGO2;ELAVL1
295	Oncogene Induced Senescence R-HSA-2559585	2/33	0.000397305	0.00334653	0	0	80.4476	629.969	TNRC6A;TNRC6B
296	Generic Transcription Pathway R-HSA-212436	6/1190	0.000437345	0.00354736	0	0	7.93834	61.4014	CNOT1;CNOT11;AGO2;CNOT10;TNRC6A;TNRC6B
24	Positive Regulation Of Cellular Biosynthetic Process (GO:0031328)	3/174	0.000479709	0.00321805	0	0	23.1708	177.079	FXR1;AGO2;ELAVL1
25	Nuclear-Transcribed mRNA Catabolic Process, Deadenylation-Dependent Decay (GO:0000288)	2/39	0.000555803	0.00357937	0	0	67.3818	505.033	CNOT11;CNOT10
297	Transcriptional Regulation By VENTX R-HSA-8853884	2/39	0.000555803	0.00434717	0	0	67.3818	505.033	TNRC6A;TNRC6B
298	ESR-mediated Signaling R-HSA-8939211	3/188	0.000601097	0.00453932	0	0	21.4022	158.735	AGO2;TNRC6A;TNRC6B
185	Regulatory RNA Binding (GO:0061980)	2/42	0.00064478	0.00486629	0	0	62.3188	457.831	AGO2;ELAVL1
26	Regulation Of Filopodium Assembly (GO:0051489)	2/43	0.000675873	0.00404605	0	0	60.7957	443.779	FXR1;CAPZB
186	Single-Stranded RNA Binding (GO:0003727)	2/43	0.000675873	0.00486629	0	0	60.7957	443.779	FXR1;AGO2
27	Positive Regulation Of Protein Metabolic Process (GO:0051247)	3/196	0.00067853	0.00404605	0	0	20.5067	149.609	FXR1;AGO2;ELAVL1
299	RNA Polymerase II Transcription R-HSA-73857	6/1312	0.000736666	0.00521546	0	0	7.15008	51.5762	CNOT1;CNOT11;AGO2;CNOT10;TNRC6A;TNRC6B
300	Signaling By NOTCH R-HSA-157118	3/203	0.000751293	0.00521546	0	0	19.782	142.306	AGO2;TNRC6A;TNRC6B
301	Transcriptional Regulation By RUNX1 R-HSA-8878171	3/204	0.000762077	0.00521546	0	0	19.6826	141.31	AGO2;TNRC6A;TNRC6B
28	Regulation Of mRNA Catabolic Process (GO:0061013)	2/46	0.000773435	0.00444725	0	0	56.642	405.821	FXR1;CNOT1
29	Regulation Of Stem Cell Population Maintenance (GO:2000036)	2/56	0.0011447	0.00635506	0	0	46.1296	312.418	CNOT1;ELAVL1
302	Gene Expression (Transcription) R-HSA-74160	6/1449	0.0012432	0.00825035	0	0	6.42377	42.9754	CNOT1;CNOT11;AGO2;CNOT10;TNRC6A;TNRC6B
303	Signaling By Nuclear Receptors R-HSA-9006931	3/260	0.00153365	0.00987849	0	0	15.3502	99.4709	AGO2;TNRC6A;TNRC6B
187	Double-Stranded RNA Binding (GO:0003725)	2/65	0.0015387	0.00923218	0	0	39.5218	255.976	AGO2;ELAVL1
304	RUNX1 Regulates Genes Involved In Megakaryocyte Differentiation And Platelet Function R-HSA-8936459	2/66	0.00158594	0.00992344	0	0	38.9023	250.787	TNRC6A;TNRC6B
188	mRNA Binding (GO:0003729)	3/282	0.0019345	0.00994884	0	0	14.124	88.2455	FXR1;AGO2;ELAVL1
30	Regulation Of mRNA Stability (GO:0043488)	2/74	0.00198854	0.0106049	0	0	34.566	215.013	FXR1;ELAVL1
31	Regulation Of Plasma Membrane Bounded Cell Projection Assembly (GO:0120032)	2/75	0.00204193	0.0106049	0	0	34.0908	211.153	FXR1;CAPZB
164	Cytoplasmic Stress Granule (GO:0010494)	2/76	0.002096	0.0139734	0	0	33.6284	207.411	FXR1;ELAVL1
305	Transcriptional Regulation By Small RNAs R-HSA-5578749	2/76	0.002096	0.0127507	0	0	33.6284	207.411	AGO2;TNRC6A
306	Signaling By WNT R-HSA-195721	3/294	0.00217831	0.0128932	0	0	13.5333	82.9486	AGO2;TNRC6A;TNRC6B
218	RNA degradation	2/79	0.00226227	0.117638	0	0	32.3133	196.833	CNOT1;CNOT10
307	Metabolism Of RNA R-HSA-8953854	4/666	0.00256862	0.0148034	0	0	8.33837	49.7333	CNOT1;CNOT11;CNOT10;ELAVL1
189	Cadherin Binding (GO:0045296)	3/319	0.00274591	0.0123566	0	0	12.4468	73.407	CAPZB;UBAP2;CD2AP
190	mRNA 3'-UTR Binding (GO:0003730)	2/93	0.00311788	0.0124715	0	0	27.3228	157.669	FXR1;ELAVL1
308	Oxidative Stress Induced Senescence R-HSA-2559580	2/93	0.00311788	0.0175081	0	0	27.3228	157.669	TNRC6A;TNRC6B
32	Positive Regulation Of Translation (GO:0045727)	2/108	0.00417764	0.0206645	0	0	23.4387	128.397	FXR1;ELAVL1
33	Regulation Of Circadian Sleep/Wake Cycle (GO:0042749)	1/5	0.00449229	0.0206645	0	0	293.794	1588.07	FXR1
34	Regulation Of Circadian Sleep/Wake Cycle, Sleep (GO:0045187)	1/5	0.00449229	0.0206645	0	0	293.794	1588.07	FXR1
35	Negative Regulation Of Amyloid Precursor Protein Biosynthetic Process (GO:0042985)	1/5	0.00449229	0.0206645	0	0	293.794	1588.07	AGO2
191	Annealing Activity (GO:0140666)	1/5	0.00449229	0.0161723	0	0	293.794	1588.07	FXR1
309	MET Activates PTPN11 R-HSA-8865999	1/5	0.00449229	0.0239954	0	0	293.794	1588.07	SOS1
310	MET Interacts With TNS Proteins R-HSA-8875513	1/5	0.00449229	0.0239954	0	0	293.794	1588.07	SOS1
36	Negative Regulation Of Retinoic Acid Receptor Signaling Pathway (GO:0048387)	1/6	0.00538847	0.0234471	0	0	235.024	1227.64	CNOT1
37	Positive Regulation Of Trophoblast Cell Migration (GO:1901165)	1/6	0.00538847	0.0234471	0	0	235.024	1227.64	AGO2
311	MET Receptor Activation R-HSA-6806942	1/6	0.00538847	0.0268199	0	0	235.024	1227.64	SOS1
312	MET Activates PI3K/AKT Signaling R-HSA-8851907	1/6	0.00538847	0.0268199	0	0	235.024	1227.64	SOS1
313	SOS-mediated Signaling R-HSA-112412	1/6	0.00538847	0.0268199	0	0	235.024	1227.64	SOS1
38	Negative Regulation Of miRNA-mediated Gene Silencing (GO:0060965)	1/7	0.00628388	0.0266238	0	0	195.843	992.879	ELAVL1
165	RISC-loading Complex (GO:0070578)	1/7	0.00628388	0.0314194	0	0	195.843	992.879	AGO2
192	Armadillo Repeat Domain Binding (GO:0070016)	1/7	0.00628388	0.0205654	0	0	195.843	992.879	CNOT1
314	Activated NTRK2 Signals Thru RAS R-HSA-9026519	1/7	0.00628388	0.0299167	0	0	195.843	992.879	SOS1
315	Activated NTRK3 Signals Thru RAS R-HSA-9034864	1/7	0.00628388	0.0299167	0	0	195.843	992.879	SOS1
39	Negative Regulation Of Glycoprotein Biosynthetic Process (GO:0010561)	1/8	0.00717853	0.0275177	0	0	167.857	828.654	AGO2
40	Negative Regulation Of Long-Term Synaptic Potentiation (GO:1900272)	1/8	0.00717853	0.0275177	0	0	167.857	828.654	FXR1
41	RISC Complex Assembly (GO:0070922)	1/8	0.00717853	0.0275177	0	0	167.857	828.654	AGO2
42	RNA Secondary Structure Unwinding (GO:0010501)	1/8	0.00717853	0.0275177	0	0	167.857	828.654	AGO2
316	SHC-related Events Triggered By IGF1R R-HSA-2428933	1/8	0.00717853	0.032752	0	0	167.857	828.654	SOS1
317	EGFR Transactivation By Gastrin R-HSA-2179392	1/8	0.00717853	0.032752	0	0	167.857	828.654	SOS1
43	Positive Regulation Of miRNA-mediated Gene Silencing (GO:2000637)	1/9	0.00807242	0.0300719	0	0	146.868	707.8	FXR1
318	Small Interfering RNA (siRNA) Biogenesis R-HSA-426486	1/9	0.00807242	0.0339973	0	0	146.868	707.8	AGO2
319	Activated NTRK2 Signals Thru FRS2 And FRS3 R-HSA-9028731	1/9	0.00807242	0.0339973	0	0	146.868	707.8	SOS1
320	MET Activates RAS Signaling R-HSA-8851805	1/9	0.00807242	0.0339973	0	0	146.868	707.8	SOS1
321	MET Receptor Recycling R-HSA-8875656	1/9	0.00807242	0.0339973	0	0	146.868	707.8	SOS1
44	Positive Regulation Of Gene Expression (GO:0010628)	3/480	0.00857155	0.0300719	0	0	8.1782	38.9225	FXR1;AGO2;ELAVL1
45	Positive Regulation Of Post-Transcriptional Gene Silencing By RNA (GO:1900370)	1/10	0.00896555	0.0300719	0	0	130.542	615.425	FXR1
46	Negative Regulation Of Intracellular Estrogen Receptor Signaling Pathway (GO:0033147)	1/10	0.00896555	0.0300719	0	0	130.542	615.425	CNOT1
47	Regulation Of Amyloid Precursor Protein Biosynthetic Process (GO:0042984)	1/10	0.00896555	0.0300719	0	0	130.542	615.425	AGO2
48	Nuclear Pore Complex Assembly (GO:0051292)	1/10	0.00896555	0.0300719	0	0	130.542	615.425	FXR1
322	HuR (ELAVL1) Binds And Stabilizes mRNA R-HSA-450520	1/10	0.00896555	0.0350617	0	0	130.542	615.425	ELAVL1
323	Constitutive Signaling By Overexpressed ERBB2 R-HSA-9634285	1/10	0.00896555	0.0350617	0	0	130.542	615.425	SOS1
324	Signal Attenuation R-HSA-74749	1/10	0.00896555	0.0350617	0	0	130.542	615.425	SOS1
325	Signaling By FGFR4 In Disease R-HSA-5655291	1/10	0.00896555	0.0350617	0	0	130.542	615.425	SOS1
326	Cellular Senescence R-HSA-2559583	2/165	0.00949073	0.0364644	0	0	15.1986	70.7867	TNRC6A;TNRC6B
327	MET Activates RAP1 And RAC1 R-HSA-8875555	1/11	0.00985792	0.0365913	0	0	117.482	542.707	SOS1
328	Signaling By PDGFRA Extracellular Domain Mutants R-HSA-9673770	1/11	0.00985792	0.0365913	0	0	117.482	542.707	SOS1
49	Regulation Of Retinoic Acid Receptor Signaling Pathway (GO:0048385)	1/12	0.0107495	0.0346135	0	0	106.797	484.098	CNOT1
50	pre-miRNA Processing (GO:0031054)	1/12	0.0107495	0.0346135	0	0	106.797	484.098	AGO2
329	Activation Of RAC1 R-HSA-428540	1/12	0.0107495	0.0385926	0	0	106.797	484.098	SOS1
330	GRB2 Events In EGFR Signaling R-HSA-179812	1/12	0.0107495	0.0385926	0	0	106.797	484.098	SOS1
51	Substrate-Dependent Cell Migration (GO:0006929)	1/13	0.0116404	0.0360404	0	0	97.8922	435.941	CD2AP
52	Regulation Of Trophoblast Cell Migration (GO:1901163)	1/13	0.0116404	0.0360404	0	0	97.8922	435.941	AGO2
331	SHC1 Events In EGFR Signaling R-HSA-180336	1/13	0.0116404	0.039832	0	0	97.8922	435.941	SOS1
332	SHC1 Events In ERBB4 Signaling R-HSA-1250347	1/13	0.0116404	0.039832	0	0	97.8922	435.941	SOS1
333	Erythropoietin Activates RAS R-HSA-9027284	1/13	0.0116404	0.039832	0	0	97.8922	435.941	SOS1
53	Nuclear Pore Organization (GO:0006999)	1/14	0.0125305	0.0373594	0	0	90.3575	395.729	FXR1
54	Negative Regulation Of Cilium Assembly (GO:1902018)	1/14	0.0125305	0.0373594	0	0	90.3575	395.729	MPHOSPH9
334	Interleukin-15 Signaling R-HSA-8983432	1/14	0.0125305	0.0409579	0	0	90.3575	395.729	SOS1
335	Constitutive Signaling By EGFRvIII R-HSA-5637810	1/14	0.0125305	0.0409579	0	0	90.3575	395.729	SOS1
336	Role Of LAT2/NTAL/LAB On Calcium Mobilization R-HSA-2730905	1/14	0.0125305	0.0409579	0	0	90.3575	395.729	SOS1
337	GRB2 Events In ERBB2 Signaling R-HSA-1963640	1/15	0.0134198	0.0413936	0	0	83.8992	361.691	SOS1
338	GRB2:SOS Provides Linkage To MAPK Signaling For Integrins R-HSA-354194	1/15	0.0134198	0.0413936	0	0	83.8992	361.691	SOS1
339	Signaling By ERBB2 ECD Mutants R-HSA-9665348	1/15	0.0134198	0.0413936	0	0	83.8992	361.691	SOS1
340	Signaling By FLT3 ITD And TKD Mutants R-HSA-9703648	1/15	0.0134198	0.0413936	0	0	83.8992	361.691	SOS1
341	Regulation Of KIT Signaling R-HSA-1433559	1/16	0.0143084	0.0429252	0	0	78.302	332.541	SOS1
342	Signaling By NTRK3 (TRKC) R-HSA-9034015	1/16	0.0143084	0.0429252	0	0	78.302	332.541	SOS1
166	Axon (GO:0030424)	2/205	0.0143595	0.0506541	0	0	12.1792	51.6805	FXR1;CD2AP
167	Endoribonuclease Complex (GO:1902555)	1/17	0.0151962	0.0506541	0	0	73.4044	307.323	AGO2
193	Nuclear Retinoic Acid Receptor Binding (GO:0042974)	1/17	0.0151962	0.0455887	0	0	73.4044	307.323	CNOT1
343	Gastrin-CREB Signaling Pathway Via PKC And MAPK R-HSA-881907	1/17	0.0151962	0.0432205	0	0	73.4044	307.323	SOS1
344	Tie2 Signaling R-HSA-210993	1/17	0.0151962	0.0432205	0	0	73.4044	307.323	SOS1
345	MET Activates PTK2 Signaling R-HSA-8874081	1/17	0.0151962	0.0432205	0	0	73.4044	307.323	SOS1
346	SHC-mediated cascade:FGFR3 R-HSA-5654704	1/17	0.0151962	0.0432205	0	0	73.4044	307.323	SOS1
55	3'-UTR-mediated mRNA Stabilization (GO:0070935)	1/18	0.0160833	0.0454283	0	0	69.083	285.311	ELAVL1
56	Actin Filament Capping (GO:0051693)	1/18	0.0160833	0.0454283	0	0	69.083	285.311	CAPZB
57	Barbed-End Actin Filament Capping (GO:0051016)	1/18	0.0160833	0.0454283	0	0	69.083	285.311	CAPZB
347	Constitutive Signaling By Ligand-Responsive EGFR Cancer Variants R-HSA-1236382	1/18	0.0160833	0.0442423	0	0	69.083	285.311	SOS1
348	Signaling By FLT3 Fusion Proteins R-HSA-9703465	1/18	0.0160833	0.0442423	0	0	69.083	285.311	SOS1
58	RNA Destabilization (GO:0050779)	1/19	0.0169696	0.046307	0	0	65.2418	265.947	FXR1
59	Pore Complex Assembly (GO:0046931)	1/19	0.0169696	0.046307	0	0	65.2418	265.947	FXR1
349	Signaling To RAS R-HSA-167044	1/19	0.0169696	0.0442423	0	0	65.2418	265.947	SOS1
350	FRS-mediated FGFR3 Signaling R-HSA-5654706	1/19	0.0169696	0.0442423	0	0	65.2418	265.947	SOS1
351	SHC-mediated cascade:FGFR4 R-HSA-5654719	1/19	0.0169696	0.0442423	0	0	65.2418	265.947	SOS1
352	Signaling By KIT In Disease R-HSA-9669938	1/19	0.0169696	0.0442423	0	0	65.2418	265.947	SOS1
353	Signaling By PDGFR In Disease R-HSA-9671555	1/19	0.0169696	0.0442423	0	0	65.2418	265.947	SOS1
60	Negative Regulation Of Small GTPase Mediated Signal Transduction (GO:0051058)	1/20	0.0178552	0.0479114	0	0	61.805	248.793	CD2AP
354	SHC-mediated cascade:FGFR1 R-HSA-5654688	1/20	0.0178552	0.0456007	0	0	61.805	248.793	SOS1
355	FRS-mediated FGFR4 Signaling R-HSA-5654712	1/21	0.01874	0.0456007	0	0	58.7118	233.502	SOS1
356	SHC1 Events In ERBB2 Signaling R-HSA-1250196	1/21	0.01874	0.0456007	0	0	58.7118	233.502	SOS1
357	Signaling By ERBB2 TMD/JMD Mutants R-HSA-9665686	1/21	0.01874	0.0456007	0	0	58.7118	233.502	SOS1
358	Signaling By FGFR3 In Disease R-HSA-5655332	1/21	0.01874	0.0456007	0	0	58.7118	233.502	SOS1
359	Negative Regulation Of MET Activity R-HSA-6807004	1/21	0.01874	0.0456007	0	0	58.7118	233.502	SOS1
61	Fc-epsilon Receptor Signaling Pathway (GO:0038095)	1/22	0.0196241	0.0517947	0	0	55.9132	219.795	SOS1
360	FRS-mediated FGFR1 Signaling R-HSA-5654693	1/22	0.0196241	0.0462115	0	0	55.9132	219.795	SOS1
361	SHC-mediated cascade:FGFR2 R-HSA-5654699	1/22	0.0196241	0.0462115	0	0	55.9132	219.795	SOS1
362	Nephrin Family Interactions R-HSA-373753	1/22	0.0196241	0.0462115	0	0	55.9132	219.795	CD2AP
363	Signaling By NTRK2 (TRKB) R-HSA-9006115	1/23	0.0205074	0.0468439	0	0	53.369	207.444	SOS1
364	FRS-mediated FGFR2 Signaling R-HSA-5654700	1/24	0.0213899	0.0468439	0	0	51.046	196.264	SOS1
365	MicroRNA (miRNA) Biogenesis R-HSA-203927	1/24	0.0213899	0.0468439	0	0	51.046	196.264	AGO2
366	Downstream Signaling Of Activated FGFR3 R-HSA-5654708	1/24	0.0213899	0.0468439	0	0	51.046	196.264	SOS1
367	Signaling By EGFR In Cancer R-HSA-1643713	1/24	0.0213899	0.0468439	0	0	51.046	196.264	SOS1
368	Signaling By ERBB2 KD Mutants R-HSA-9664565	1/24	0.0213899	0.0468439	0	0	51.046	196.264	SOS1
369	Signaling By Erythropoietin R-HSA-9006335	1/24	0.0213899	0.0468439	0	0	51.046	196.264	SOS1
62	Regulation Of Intracellular Estrogen Receptor Signaling Pathway (GO:0033146)	1/25	0.0222717	0.0578347	0	0	48.9167	186.1	CNOT1
370	Interleukin-7 Signaling R-HSA-1266695	1/25	0.0222717	0.0478187	0	0	48.9167	186.1	SOS1
371	Signaling By ERBB2 In Cancer R-HSA-1227990	1/25	0.0222717	0.0478187	0	0	48.9167	186.1	SOS1
63	Fc Receptor Signaling Pathway (GO:0038093)	1/26	0.0231528	0.0591682	0	0	46.9576	176.826	SOS1
372	Downstream Signaling Of Activated FGFR4 R-HSA-5654716	1/26	0.0231528	0.0492278	0	0	46.9576	176.826	SOS1
373	FLT3 Signaling In Disease R-HSA-9682385	1/27	0.0240331	0.0496533	0	0	45.1493	168.331	SOS1
374	Integrin Signaling R-HSA-354192	1/27	0.0240331	0.0496533	0	0	45.1493	168.331	SOS1
375	Interleukin Receptor SHC Signaling R-HSA-912526	1/27	0.0240331	0.0496533	0	0	45.1493	168.331	SOS1
168	Dendrite (GO:0030425)	2/270	0.0240947	0.0688421	0	0	9.19496	34.2582	FXR1;CD2AP
376	DAP12 Signaling R-HSA-2424491	1/28	0.0249126	0.0499852	0	0	43.4749	160.526	SOS1
377	MET Promotes Cell Motility R-HSA-8875878	1/28	0.0249126	0.0499852	0	0	43.4749	160.526	SOS1
378	Downstream Signal Transduction R-HSA-186763	1/28	0.0249126	0.0499852	0	0	43.4749	160.526	SOS1
379	Cellular Responses To Stress R-HSA-2262752	3/722	0.0255112	0.0499852	0	0	5.35828	19.6576	CAPZB;TNRC6A;TNRC6B
380	Downstream Signaling Of Activated FGFR2 R-HSA-5654696	1/29	0.0257914	0.0499852	0	0	41.9202	153.332	SOS1
381	FCERI Mediated Ca+2 Mobilization R-HSA-2871809	1/29	0.0257914	0.0499852	0	0	41.9202	153.332	SOS1
382	FCERI Mediated MAPK Activation R-HSA-2871796	1/29	0.0257914	0.0499852	0	0	41.9202	153.332	SOS1
383	Adaptive Immune System R-HSA-1280218	3/733	0.0265321	0.0506237	0	0	5.27452	19.1433	CAPZB;SOS1;DZIP3
384	Downstream Signaling Of Activated FGFR1 R-HSA-5654687	1/30	0.0266695	0.0506237	0	0	40.4726	146.682	SOS1
385	Cellular Responses To Stimuli R-HSA-8953897	3/736	0.0268144	0.0506237	0	0	5.25211	19.0064	CAPZB;TNRC6A;TNRC6B
64	Regulation Of Long-Term Synaptic Potentiation (GO:1900271)	1/31	0.0275468	0.0671975	0	0	39.1216	140.52	FXR1
65	Negative Regulation Of Intracellular Steroid Hormone Receptor Signaling Pathway (GO:0033144)	1/31	0.0275468	0.0671975	0	0	39.1216	140.52	CNOT1
66	Regulation Of Cell Morphogenesis (GO:0022604)	1/31	0.0275468	0.0671975	0	0	39.1216	140.52	CAPZB
194	RNA Polymerase II Complex Binding (GO:0000993)	1/31	0.0275468	0.0638444	0	0	39.1216	140.52	AGO2
386	Antigen Activates B Cell Receptor Leading To Second Messenger Generation R-HSA-983695	1/31	0.0275468	0.051562	0	0	39.1216	140.52	SOS1
67	miRNA Processing (GO:0035196)	1/32	0.0284234	0.068301	0	0	37.8577	134.794	AGO2
68	Regulation Of Lamellipodium Assembly (GO:0010591)	1/33	0.0292992	0.0683648	0	0	36.6728	129.462	CAPZB
69	Positive Regulation Of Reproductive Process (GO:2000243)	1/33	0.0292992	0.0683648	0	0	36.6728	129.462	AGO2
195	RNA Polymerase Core Enzyme Binding (GO:0043175)	1/33	0.0292992	0.0638444	0	0	36.6728	129.462	AGO2
387	Signaling To ERKs R-HSA-187687	1/33	0.0292992	0.0543773	0	0	36.6728	129.462	SOS1
196	3'-5'-RNA Exonuclease Activity (GO:0000175)	1/34	0.0301743	0.0638444	0	0	35.5597	124.486	CNOT1
197	Nuclear Estrogen Receptor Binding (GO:0030331)	1/34	0.0301743	0.0638444	0	0	35.5597	124.486	CNOT1
388	COPI-independent Golgi-to-ER Retrograde Traffic R-HSA-6811436	1/34	0.0301743	0.0555308	0	0	35.5597	124.486	CAPZB
70	Regulatory ncRNA Processing (GO:0070918)	1/35	0.0310486	0.070406	0	0	34.5121	119.833	AGO2
71	Skeletal Muscle Organ Development (GO:0060538)	1/35	0.0310486	0.070406	0	0	34.5121	119.833	FXR1
198	Core Promoter Sequence-Specific DNA Binding (GO:0001046)	1/35	0.0310486	0.0638444	0	0	34.5121	119.833	AGO2
72	Negative Regulation Of Organelle Assembly (GO:1902116)	1/36	0.0319222	0.0713815	0	0	33.5244	115.473	MPHOSPH9
199	Basal RNA Polymerase II Transcription Machinery Binding (GO:0001099)	1/36	0.0319222	0.0638444	0	0	33.5244	115.473	AGO2
389	Platelet Aggregation (Plug Formation) R-HSA-76009	1/36	0.0319222	0.0577765	0	0	33.5244	115.473	SOS1
390	Signaling By FGFR1 In Disease R-HSA-5655302	1/36	0.0319222	0.0577765	0	0	33.5244	115.473	SOS1
73	RNA Stabilization (GO:0043489)	1/37	0.032795	0.0723287	0	0	32.5915	111.381	ELAVL1
391	FLT3 Signaling R-HSA-9607240	1/37	0.032795	0.0588697	0	0	32.5915	111.381	SOS1
392	HSP90 Chaperone Cycle For Steroid Hormone Receptors (SHR) In Presence Of Ligand R-HSA-3371497	1/38	0.0336671	0.0599439	0	0	31.7091	107.533	CAPZB
169	Actin Cytoskeleton (GO:0015629)	2/327	0.0343153	0.0857883	0	0	7.56038	25.4949	CAPZB;CD2AP
393	Signaling By FGFR3 R-HSA-5654741	1/39	0.0345385	0.0609994	0	0	30.8731	103.909	SOS1
394	RET Signaling R-HSA-8853659	1/40	0.0354091	0.0615443	0	0	30.0799	100.491	SOS1
395	Signaling By FGFR4 R-HSA-5654743	1/40	0.0354091	0.0615443	0	0	30.0799	100.491	SOS1
74	Negative Regulation Of mRNA Catabolic Process (GO:1902373)	1/41	0.0362789	0.0789312	0	0	29.3265	97.2618	ELAVL1
200	RNA Endonuclease Activity (GO:0004521)	1/41	0.0362789	0.068739	0	0	29.3265	97.2618	AGO2
396	RHOF GTPase Cycle R-HSA-9035034	1/42	0.0371481	0.0630653	0	0	28.6098	94.2074	CAPZB
397	Signaling By FGFR2 In Disease R-HSA-5655253	1/42	0.0371481	0.0630653	0	0	28.6098	94.2074	SOS1
398	Signaling By SCF-KIT R-HSA-1433557	1/42	0.0371481	0.0630653	0	0	28.6098	94.2074	SOS1
75	mRNA Catabolic Process (GO:0006402)	1/43	0.0380165	0.0816087	0	0	27.9272	91.3145	CNOT10
399	DAP12 Interactions R-HSA-2172127	1/43	0.0380165	0.0640431	0	0	27.9272	91.3145	SOS1
400	Interleukin-2 Family Signaling R-HSA-451927	1/44	0.0388841	0.0645123	0	0	27.2763	88.5709	SOS1
401	Interleukin-3, Interleukin-5 And GM-CSF Signaling R-HSA-512988	1/44	0.0388841	0.0645123	0	0	27.2763	88.5709	SOS1
76	Epidermal Growth Factor Receptor Signaling Pathway (GO:0007173)	1/45	0.039751	0.0842094	0	0	26.6551	85.9658	SOS1
77	Regulation Of Nervous System Development (GO:0051960)	1/46	0.0406172	0.0849268	0	0	26.0614	83.4895	FXR1
78	Negative Regulation Of Tumor Necrosis Factor Production (GO:0032720)	1/47	0.0414826	0.0856244	0	0	25.4936	81.1329	FXR1
402	IRS-mediated Signaling R-HSA-112399	1/47	0.0414826	0.068306	0	0	25.4936	81.1329	SOS1
79	Negative Regulation Of Tumor Necrosis Factor Superfamily Cytokine Production (GO:1903556)	1/49	0.0432113	0.0880635	0	0	24.4289	76.7472	FXR1
403	Signaling By EGFR R-HSA-177929	1/49	0.0432113	0.0695829	0	0	24.4289	76.7472	SOS1
404	Signaling By ERBB2 R-HSA-1227986	1/49	0.0432113	0.0695829	0	0	24.4289	76.7472	SOS1
405	Signaling By FGFR1 R-HSA-5654736	1/49	0.0432113	0.0695829	0	0	24.4289	76.7472	SOS1
406	IRS-related Events Triggered By IGF1R R-HSA-2428928	1/51	0.044937	0.0714579	0	0	23.4494	72.7517	SOS1
80	Regulation Of Cell Development (GO:0060284)	1/52	0.0457987	0.0905087	0	0	22.9885	70.8849	FXR1
170	Sarcolemma (GO:0042383)	1/52	0.0457987	0.101775	0	0	22.9885	70.8849	AHNAK2
407	IGF1R Signaling Cascade R-HSA-2428924	1/52	0.0457987	0.0714579	0	0	22.9885	70.8849	SOS1
408	RHOD GTPase Cycle R-HSA-9013405	1/52	0.0457987	0.0714579	0	0	22.9885	70.8849	CAPZB
409	Signaling By PDGF R-HSA-186797	1/52	0.0457987	0.0714579	0	0	22.9885	70.8849	SOS1
81	Spermatid Development (GO:0007286)	1/53	0.0466598	0.0905087	0	0	22.5452	69.0983	FXR1
82	mRNA Stabilization (GO:0048255)	1/53	0.0466598	0.0905087	0	0	22.5452	69.0983	ELAVL1
83	Regulation Of Alternative mRNA Splicing, Via Spliceosome (GO:0000381)	1/53	0.0466598	0.0905087	0	0	22.5452	69.0983	FXR1
201	Polyubiquitin Modification-Dependent Protein Binding (GO:0031593)	1/53	0.0466598	0.0839876	0	0	22.5452	69.0983	DZIP3
410	Insulin Receptor Signaling Cascade R-HSA-74751	1/53	0.0466598	0.0714579	0	0	22.5452	69.0983	SOS1
411	Deposition Of New CENPA-containing Nucleosomes At Centromere R-HSA-606279	1/53	0.0466598	0.0714579	0	0	22.5452	69.0983	MIS18BP1
412	Signaling By Type 1 Insulin-like Growth Factor 1 Receptor (IGF1R) R-HSA-2404192	1/53	0.0466598	0.0714579	0	0	22.5452	69.0983	SOS1
84	ERBB Signaling Pathway (GO:0038127)	1/54	0.04752	0.0910801	0	0	22.1188	67.3871	SOS1
85	Regulation Of Synaptic Transmission, Glutamatergic (GO:0051966)	1/55	0.0483796	0.0916366	0	0	21.7081	65.7467	FXR1
86	RNA Catabolic Process (GO:0006401)	1/57	0.0500965	0.0937853	0	0	20.9307	62.6623	CNOT10
413	NCAM Signaling For Neurite Out-Growth R-HSA-375165	1/57	0.0500965	0.0751447	0	0	20.9307	62.6623	SOS1
414	NRAGE Signals Death Thru JNK R-HSA-193648	1/57	0.0500965	0.0751447	0	0	20.9307	62.6623	SOS1
415	Signaling By ERBB4 R-HSA-1236394	1/57	0.0500965	0.0751447	0	0	20.9307	62.6623	SOS1
87	Muscle Organ Development (GO:0007517)	1/58	0.0509538	0.0942939	0	0	20.5624	61.211	FXR1
202	Endonuclease Activity (GO:0004519)	1/58	0.0509538	0.0847808	0	0	20.5624	61.211	AGO2
219	Endometrial cancer	1/58	0.0509538	0.208361	0	0	20.5624	61.211	SOS1
203	SH3 Domain Binding (GO:0017124)	1/59	0.0518105	0.0847808	0	0	20.2069	59.8157	CD2AP
171	Filopodium (GO:0030175)	1/60	0.0526664	0.105333	0	0	19.8634	58.4735	FXR1
88	Positive Regulation Of Organelle Assembly (GO:1902117)	1/61	0.0535215	0.0979201	0	0	19.5314	57.1814	CNOT1
416	Signaling By FGFR In Disease R-HSA-1226099	1/61	0.0535215	0.0797362	0	0	19.5314	57.1814	SOS1
417	Signaling By BRAF And RAF1 Fusions R-HSA-6802952	1/62	0.054376	0.0804617	0	0	19.2102	55.937	FXR1
418	Diseases Of Signal Transduction By Growth Factor Receptors And Second Messengers R-HSA-5663202	2/424	0.054856	0.0806273	0	0	5.79384	16.8198	FXR1;SOS1
419	Signaling By MET R-HSA-6806834	1/63	0.0552297	0.0806353	0	0	18.8994	54.7376	SOS1
89	Regulation Of Neurogenesis (GO:0050767)	1/67	0.0586372	0.106074	0	0	17.7504	50.3471	FXR1
220	Acute myeloid leukemia	1/67	0.0586372	0.208361	0	0	17.7504	50.3471	SOS1
420	Sensory Processing Of Sound By Inner Hair Cells Of Cochlea R-HSA-9662360	1/67	0.0586372	0.0847474	0	0	17.7504	50.3471	CAPZB
421	RHO GTPase Cycle R-HSA-9012999	2/441	0.0588201	0.0847474	0	0	5.56464	15.7661	CAPZB;SOS1
221	Fc epsilon RI signaling pathway	1/68	0.0594873	0.208361	0	0	17.4846	49.3415	SOS1
222	Renal cell carcinoma	1/69	0.0603366	0.208361	0	0	17.2266	48.3692	SOS1
90	Positive Regulation Of Protein Transport (GO:0051222)	1/70	0.0611853	0.109454	0	0	16.9761	47.4287	CD2AP
204	RNA Nuclease Activity (GO:0004540)	1/70	0.0611853	0.0957682	0	0	16.9761	47.4287	AGO2
223	Prolactin signaling pathway	1/70	0.0611853	0.208361	0	0	16.9761	47.4287	SOS1
422	Signal Transduction R-HSA-162582	5/2465	0.0613867	0.0878672	0	0	2.73952	7.64482	CAPZB;AGO2;SOS1;TNRC6A;TNRC6B
91	Regulation Of Cilium Assembly (GO:1902017)	1/71	0.0620332	0.109751	0	0	16.7328	46.5186	MPHOSPH9
224	Non-small cell lung cancer	1/72	0.0628803	0.208361	0	0	16.4963	45.6373	SOS1
423	Signaling By FGFR2 R-HSA-5654738	1/72	0.0628803	0.0894207	0	0	16.4963	45.6373	SOS1
92	Positive Regulation Of Secretion By Cell (GO:1903532)	1/73	0.0637268	0.111522	0	0	16.2663	44.7837	CD2AP
424	Cell Death Signaling Via NRAGE, NRIF And NADE R-HSA-204998	1/74	0.0645725	0.0912347	0	0	16.0427	43.9565	SOS1
225	Glioma	1/75	0.0654175	0.208361	0	0	15.8251	43.1545	SOS1
425	Sensory Processing Of Sound R-HSA-9659379	1/75	0.0654175	0.0918361	0	0	15.8251	43.1545	CAPZB
93	Positive Regulation Of Protein Secretion (GO:0050714)	1/76	0.0662618	0.114711	0	0	15.6133	42.3768	CD2AP
226	Chronic myeloid leukemia	1/76	0.0662618	0.208361	0	0	15.6133	42.3768	SOS1
227	Bacterial invasion of epithelial cells	1/77	0.0671054	0.208361	0	0	15.4071	41.6222	CD2AP
426	Signaling By Insulin Receptor R-HSA-74752	1/77	0.0671054	0.0930041	0	0	15.4071	41.6222	SOS1
427	Oncogenic MAPK Signaling R-HSA-6802957	1/78	0.0679482	0.0930041	0	0	15.2063	40.8898	FXR1
428	G Alpha (12/13) Signaling Events R-HSA-416482	1/78	0.0679482	0.0930041	0	0	15.2063	40.8898	SOS1
429	Constitutive Signaling By Aberrant PI3K In Cancer R-HSA-2219530	1/78	0.0679482	0.0930041	0	0	15.2063	40.8898	SOS1
430	COPI-mediated Anterograde Transport R-HSA-6807878	1/80	0.0696318	0.0947165	0	0	14.8198	39.4879	CAPZB
228	B cell receptor signaling pathway	1/81	0.0704725	0.208361	0	0	14.6338	38.8167	SOS1
94	mRNA Metabolic Process (GO:0016071)	1/85	0.0738281	0.12645	0	0	13.9342	36.3127	CNOT10
229	ErbB signaling pathway	1/85	0.0738281	0.208361	0	0	13.9342	36.3127	SOS1
230	Colorectal cancer	1/86	0.0746652	0.208361	0	0	13.7696	35.7284	SOS1
431	Signaling By FGFR R-HSA-190236	1/86	0.0746652	0.100936	0	0	13.7696	35.7284	SOS1
231	Gap junction	1/88	0.0763373	0.208361	0	0	13.4517	34.6057	SOS1
432	Regulation Of mRNA Stability By Proteins That Bind AU-rich Elements R-HSA-450531	1/88	0.0763373	0.102564	0	0	13.4517	34.6057	ELAVL1
95	Regulation Of RNA Metabolic Process (GO:0051252)	1/91	0.07884	0.133613	0	0	13.0013	33.0277	AHNAK2
232	GnRH signaling pathway	1/93	0.080505	0.208361	0	0	12.7174	32.0407	SOS1
96	Regulation Of mRNA Splicing, Via Spliceosome (GO:0048024)	1/94	0.0813364	0.136408	0	0	12.58	31.5653	FXR1
233	IL-17 signaling pathway	1/94	0.0813364	0.208361	0	0	12.58	31.5653	ELAVL1
433	P75 NTR Receptor-Mediated Signaling R-HSA-193704	1/95	0.0821671	0.109723	0	0	12.4456	31.1015	SOS1
234	Prostate cancer	1/97	0.0838264	0.208361	0	0	12.185	30.2068	SOS1
434	Potential Therapeutics For SARS R-HSA-9679191	1/97	0.0838264	0.11126	0	0	12.185	30.2068	SOS1
235	Choline metabolism in cancer	1/98	0.0846549	0.208361	0	0	12.0588	29.7753	SOS1
97	Protein Complex Oligomerization (GO:0051259)	1/100	0.08631	0.14305	0	0	11.814	28.9421	ELAVL1
98	Regulation Of Protein Secretion (GO:0050708)	1/102	0.0879622	0.14305	0	0	11.5789	28.1466	CD2AP
99	Regulation Of RNA Splicing (GO:0043484)	1/102	0.0879622	0.14305	0	0	11.5789	28.1466	AHNAK2
172	Neuron Projection (GO:0043005)	2/557	0.0883347	0.160609	0	0	4.37545	10.6176	FXR1;CD2AP
100	Positive Regulation Of Vasculature Development (GO:1904018)	1/104	0.0896115	0.144275	0	0	11.3529	27.3864	AGO2
236	T cell receptor signaling pathway	1/104	0.0896115	0.208361	0	0	11.3529	27.3864	SOS1
435	MHC Class II Antigen Presentation R-HSA-2132295	1/104	0.0896115	0.118222	0	0	11.3529	27.3864	CAPZB
436	PI3K/AKT Signaling In Cancer R-HSA-2219528	1/105	0.0904352	0.118595	0	0	11.2432	27.0188	SOS1
437	PI5P, PP2A And IER3 Regulate PI3K/AKT Signaling R-HSA-6811558	1/106	0.0912581	0.118961	0	0	11.1356	26.6593	SOS1
438	Interleukin-4 And Interleukin-13 Signaling R-HSA-6785807	1/107	0.0920803	0.119323	0	0	11.03	26.3075	SOS1
439	Hemostasis R-HSA-109582	2/576	0.0935349	0.120031	0	0	4.22648	10.0143	CAPZB;SOS1
440	Signaling By B Cell Receptor (BCR) R-HSA-983705	1/109	0.0937227	0.120031	0	0	10.8246	25.6264	SOS1
101	Negative Regulation Of Inflammatory Response (GO:0050728)	1/111	0.0953622	0.146086	0	0	10.6267	24.9736	FXR1
102	Cytoskeleton Organization (GO:0007010)	1/111	0.0953622	0.146086	0	0	10.6267	24.9736	CAPZB
103	RNA Metabolic Process (GO:0016070)	1/111	0.0953622	0.146086	0	0	10.6267	24.9736	AGO2
104	Regulation Of Protein Serine/Threonine Kinase Activity (GO:0071900)	1/112	0.0961809	0.146086	0	0	10.5305	24.6574	SOS1
105	Small GTPase Mediated Signal Transduction (GO:0007264)	1/112	0.0961809	0.146086	0	0	10.5305	24.6574	SOS1
106	Negative Regulation Of Defense Response (GO:0031348)	1/112	0.0961809	0.146086	0	0	10.5305	24.6574	FXR1
205	Phosphatase Binding (GO:0019902)	1/112	0.0961809	0.142031	0	0	10.5305	24.6574	DZIP3
441	Golgi-to-ER Retrograde Transport R-HSA-8856688	1/112	0.0961809	0.122463	0	0	10.5305	24.6574	CAPZB
442	Negative Regulation Of PI3K/AKT Network R-HSA-199418	1/113	0.0969989	0.122791	0	0	10.4359	24.3476	SOS1
107	Regulation Of MAP Kinase Activity (GO:0043405)	1/114	0.0978162	0.147181	0	0	10.3431	24.0441	SOS1
443	Signaling By NTRK1 (TRKA) R-HSA-187037	1/114	0.0978162	0.123114	0	0	10.3431	24.0441	SOS1
206	Nuclear Receptor Binding (GO:0016922)	1/115	0.0986329	0.142031	0	0	10.2518	23.7468	CNOT1
173	Cytoskeleton (GO:0005856)	2/599	0.0999512	0.166585	0	0	4.05884	9.34779	CAPZB;CD2AP
108	Regulation Of Small GTPase Mediated Signal Transduction (GO:0051056)	1/118	0.101079	0.150502	0	0	9.98743	22.8898	CD2AP
444	Chromosome Maintenance R-HSA-73886	1/118	0.101079	0.126493	0	0	9.98743	22.8898	MIS18BP1
109	Positive Regulation Of Angiogenesis (GO:0045766)	1/119	0.101892	0.150502	0	0	9.90229	22.6152	AGO2
237	Neurotrophin signaling pathway	1/119	0.101892	0.208361	0	0	9.90229	22.6152	SOS1
238	Growth hormone synthesis, secretion and action	1/119	0.101892	0.208361	0	0	9.90229	22.6152	SOS1
239	AMPK signaling pathway	1/120	0.102705	0.208361	0	0	9.81859	22.346	ELAVL1
445	Cell-Cell Communication R-HSA-1500931	1/120	0.102705	0.127798	0	0	9.81859	22.346	CD2AP
110	Modulation Of Chemical Synaptic Transmission (GO:0050804)	1/123	0.105141	0.15306	0	0	9.5757	21.5688	FXR1
111	Neuron Projection Guidance (GO:0097485)	1/124	0.105951	0.15306	0	0	9.49737	21.3195	SOS1
446	Platelet Degranulation R-HSA-114608	1/125	0.106761	0.132094	0	0	9.4203	21.0748	SOS1
112	Protein-Containing Complex Organization (GO:0043933)	1/126	0.10757	0.15306	0	0	9.34447	20.8346	CD2AP
113	Regulation Of Anatomical Structure Morphogenesis (GO:0022603)	1/127	0.108378	0.15306	0	0	9.26984	20.5988	CAPZB
114	Regulation Of Tumor Necrosis Factor Production (GO:0032680)	1/127	0.108378	0.15306	0	0	9.26984	20.5988	FXR1
115	Protein Homooligomerization (GO:0051260)	1/129	0.109992	0.153989	0	0	9.12408	20.14	ELAVL1
240	Relaxin signaling pathway	1/129	0.109992	0.208361	0	0	9.12408	20.14	SOS1
447	Fc Epsilon Receptor (FCERI) Signaling R-HSA-2454202	1/130	0.110799	0.135558	0	0	9.0529	19.9167	SOS1
448	Response To Elevated Platelet Cytosolic Ca2+ R-HSA-76005	1/130	0.110799	0.135558	0	0	9.0529	19.9167	SOS1
241	Natural killer cell mediated cytotoxicity	1/131	0.111604	0.208361	0	0	8.98281	19.6975	SOS1
242	FoxO signaling pathway	1/131	0.111604	0.208361	0	0	8.98281	19.6975	SOS1
449	Signaling By NTRKs R-HSA-166520	1/132	0.112409	0.136229	0	0	8.91379	19.4821	SOS1
450	Signaling By Rho GTPases R-HSA-194315	2/644	0.112863	0.136229	0	0	3.76558	8.21491	CAPZB;SOS1
174	Asymmetric Synapse (GO:0032279)	1/133	0.113213	0.174174	0	0	8.84581	19.2704	FXR1
451	ER To Golgi Anterograde Transport R-HSA-199977	1/133	0.113213	0.136229	0	0	8.84581	19.2704	CAPZB
452	Cell Surface Interactions At Vascular Wall R-HSA-202733	1/134	0.114017	0.136446	0	0	8.77886	19.0625	SOS1
116	Non-Membrane-Bounded Organelle Assembly (GO:0140694)	1/135	0.114819	0.159361	0	0	8.71291	18.8582	FXR1
453	Factors Involved In Megakaryocyte Development And Platelet Production R-HSA-983231	1/136	0.115621	0.137615	0	0	8.64793	18.6573	CAPZB
243	Insulin signaling pathway	1/137	0.116423	0.208361	0	0	8.58391	18.4599	SOS1
244	Estrogen signaling pathway	1/137	0.116423	0.208361	0	0	8.58391	18.4599	SOS1
454	Signaling By Rho GTPases, Miro GTPases And RHOBTB3 R-HSA-9716542	2/660	0.11756	0.138963	0	0	3.67097	7.85884	CAPZB;SOS1
455	Death Receptor Signaling R-HSA-73887	1/139	0.118024	0.138963	0	0	8.45865	18.0751	SOS1
207	Protein Homodimerization Activity (GO:0042803)	2/662	0.118151	0.163594	0	0	3.65947	7.81586	FXR1;ELAVL1
117	Actin Filament Organization (GO:0007015)	1/144	0.122013	0.165836	0	0	8.16084	17.1673	CD2AP
118	Ras Protein Signal Transduction (GO:0007265)	1/144	0.122013	0.165836	0	0	8.16084	17.1673	SOS1
119	Negative Regulation Of Response To External Stimulus (GO:0032102)	1/146	0.123605	0.165836	0	0	8.04746	16.8246	FXR1
120	Positive Regulation Of Cellular Catabolic Process (GO:0031331)	1/146	0.123605	0.165836	0	0	8.04746	16.8246	CNOT1
245	Breast cancer	1/147	0.124399	0.208361	0	0	7.99194	16.6573	SOS1
246	Phospholipase D signaling pathway	1/148	0.125193	0.208361	0	0	7.93717	16.4926	SOS1
121	Axon Guidance (GO:0007411)	1/149	0.125986	0.167306	0	0	7.88315	16.3306	SOS1
247	Gastric cancer	1/149	0.125986	0.208361	0	0	7.88315	16.3306	SOS1
122	protein-RNA Complex Assembly (GO:0022618)	1/150	0.126779	0.167306	0	0	7.82985	16.1711	AGO2
175	Postsynaptic Density (GO:0014069)	1/151	0.127571	0.182244	0	0	7.77725	16.014	FXR1
248	mTOR signaling pathway	1/154	0.129942	0.208361	0	0	7.62361	15.5572	SOS1
249	Hepatitis C	1/157	0.132307	0.208361	0	0	7.47587	15.1209	SOS1
123	Peptide Biosynthetic Process (GO:0043043)	1/158	0.133094	0.174213	0	0	7.42788	14.9798	AGO2
124	Regulation Of Macromolecule Metabolic Process (GO:0060255)	1/162	0.136236	0.176887	0	0	7.24187	14.4357	UBAP2
250	JAK-STAT signaling pathway	1/162	0.136236	0.208361	0	0	7.24187	14.4357	SOS1
251	Hepatitis B	1/162	0.136236	0.208361	0	0	7.24187	14.4357	SOS1
456	Transport To Golgi And Subsequent Modification R-HSA-948021	1/164	0.137803	0.161384	0	0	7.15229	14.1753	CAPZB
252	Hepatocellular carcinoma	1/168	0.140928	0.209379	0	0	6.97957	13.6765	SOS1
125	Positive Regulation Of Hydrolase Activity (GO:0051345)	1/176	0.147147	0.189526	0	0	6.65782	12.7585	SOS1
457	RAC1 GTPase Cycle R-HSA-9013149	1/178	0.148696	0.173214	0	0	6.58192	12.5442	SOS1
458	mRNA Splicing - Major Pathway R-HSA-72163	1/181	0.151013	0.174062	0	0	6.47124	12.2332	ELAVL1
459	Intra-Golgi And Retrograde Golgi-to-ER Traffic R-HSA-6811442	1/181	0.151013	0.174062	0	0	6.47124	12.2332	CAPZB
126	Macromolecule Biosynthetic Process (GO:0009059)	1/183	0.152554	0.19493	0	0	6.39948	12.0325	AGO2
208	Actin Binding (GO:0003779)	1/183	0.152554	0.203051	0	0	6.39948	12.0325	CAPZB
253	Alcoholism	1/186	0.154861	0.217643	0	0	6.29475	11.7411	SOS1
254	RNA transport	1/186	0.154861	0.217643	0	0	6.29475	11.7411	FXR1
127	Axonogenesis (GO:0007409)	1/188	0.156396	0.198266	0	0	6.2268	11.553	SOS1
460	mRNA Splicing R-HSA-72172	1/189	0.157163	0.180202	0	0	6.19337	11.4607	ELAVL1
209	Protein Heterodimerization Activity (GO:0046982)	1/190	0.157929	0.203051	0	0	6.16029	11.3695	FXR1
255	Chemokine signaling pathway	1/192	0.159458	0.218206	0	0	6.09516	11.1906	SOS1
256	Focal adhesion	1/201	0.166309	0.220138	0	0	5.81824	10.4374	SOS1
210	Guanyl-Nucleotide Exchange Factor Activity (GO:0005085)	1/203	0.167824	0.208333	0	0	5.76005	10.2808	SOS1
128	Regulation Of Angiogenesis (GO:0045765)	1/205	0.169337	0.212994	0	0	5.703	10.1278	AGO2
257	Proteoglycans in cancer	1/205	0.169337	0.220138	0	0	5.703	10.1278	SOS1
461	Signaling By ROBO Receptors R-HSA-376176	1/209	0.172354	0.196592	0	0	5.59219	9.83221	SOS1
211	GTPase Activator Activity (GO:0005096)	1/211	0.173859	0.208631	0	0	5.53838	9.68944	SOS1
462	G Alpha (Q) Signaling Events R-HSA-416476	1/212	0.174611	0.198133	0	0	5.51185	9.61926	SOS1
129	Regulation Of GTPase Activity (GO:0043087)	1/214	0.176112	0.219798	0	0	5.45954	9.48125	SOS1
258	Regulation of actin cytoskeleton	1/218	0.179106	0.22396	0	0	5.35782	9.21427	SOS1
130	Positive Regulation Of Protein Modification Process (GO:0031401)	1/225	0.184321	0.224437	0	0	5.18855	8.77424	FXR1
259	Human cytomegalovirus infection	1/225	0.184321	0.22396	0	0	5.18855	8.77424	SOS1
131	Protein Polyubiquitination (GO:0000209)	1/226	0.185063	0.224437	0	0	5.16523	8.71404	DZIP3
132	Apoptotic Process (GO:0006915)	1/228	0.186546	0.224437	0	0	5.1192	8.59553	FXR1
133	Positive Regulation Of Phosphorylation (GO:0042327)	1/231	0.188766	0.224437	0	0	5.05166	8.42237	FXR1
134	Negative Regulation Of Intracellular Signal Transduction (GO:1902532)	1/231	0.188766	0.224437	0	0	5.05166	8.42237	CD2AP
260	Thermogenesis	1/232	0.189505	0.22396	0	0	5.02954	8.36584	SOS1
261	Ras signaling pathway	1/232	0.189505	0.22396	0	0	5.02954	8.36584	SOS1
135	Positive Regulation Of Developmental Process (GO:0051094)	1/233	0.190243	0.224437	0	0	5.00761	8.30989	AGO2
136	Translation (GO:0006412)	1/234	0.19098	0.224437	0	0	4.98586	8.25452	AGO2
137	Positive Regulation Of GTPase Activity (GO:0043547)	1/234	0.19098	0.224437	0	0	4.98586	8.25452	SOS1
176	Vesicle (GO:0031982)	1/235	0.191717	0.255622	0	0	4.9643	8.19972	CD2AP
262	Chemical carcinogenesis	1/239	0.194657	0.224938	0	0	4.87988	7.98599	SOS1
138	Regulation Of Inflammatory Response (GO:0050727)	1/240	0.195391	0.227956	0	0	4.85922	7.9339	FXR1
212	Ubiquitin-Like Protein Transferase Activity (GO:0019787)	1/240	0.195391	0.226906	0	0	4.85922	7.9339	DZIP3
463	Processing Of Capped Intron-Containing Pre-mRNA R-HSA-72203	1/242	0.196856	0.222224	0	0	4.8184	7.83126	ELAVL1
263	Salmonella infection	1/249	0.201965	0.225862	0	0	4.68074	7.4876	AHNAK2
264	Endocytosis	1/252	0.204145	0.225862	0	0	4.62409	7.34734	CAPZB
464	Platelet Activation, Signaling And Aggregation R-HSA-76002	1/254	0.205595	0.230899	0	0	4.58707	7.25605	SOS1
139	Cytokine-Mediated Signaling Pathway (GO:0019221)	1/257	0.207766	0.240649	0	0	4.53263	7.12232	SOS1
140	Cellular Component Assembly (GO:0022607)	1/260	0.209931	0.24142	0	0	4.47945	6.99232	CD2AP
141	Regulation Of Protein Phosphorylation (GO:0001932)	1/265	0.213527	0.243723	0	0	4.39349	6.78353	FXR1
142	Negative Regulation Of Signal Transduction (GO:0009968)	1/267	0.214961	0.243723	0	0	4.36002	6.70266	CNOT1
465	RAF/MAP Kinase Cascade R-HSA-5673001	1/271	0.217821	0.243382	0	0	4.29455	6.54524	SOS1
143	Positive Regulation Of Cell Migration (GO:0030335)	1/272	0.218535	0.246043	0	0	4.27849	6.50677	AGO2
144	Plasma Membrane Bounded Cell Projection Assembly (GO:0120031)	1/275	0.220672	0.246724	0	0	4.231	6.39337	CD2AP
466	MAPK1/MAPK3 Signaling R-HSA-5684996	1/277	0.222094	0.246896	0	0	4.19991	6.31942	SOS1
467	Asparagine N-linked Glycosylation R-HSA-446203	1/282	0.225638	0.249569	0	0	4.12414	6.14012	CAPZB
265	MAPK signaling pathway	1/294	0.23408	0.253587	0	0	3.95282	5.73986	SOS1
145	Gene Expression (GO:0010467)	1/296	0.235479	0.261463	0	0	3.92562	5.67698	AGO2
468	Antigen Processing: Ubiquitination And Proteasome Degradation R-HSA-983168	1/307	0.243128	0.267563	0	0	3.78239	5.34893	DZIP3
146	Cellular Response To Cytokine Stimulus (GO:0071345)	1/308	0.24382	0.26887	0	0	3.76988	5.32053	SOS1
266	MicroRNAs in cancer	1/310	0.245202	0.260214	0	0	3.7451	5.26439	SOS1
147	Supramolecular Fiber Organization (GO:0097435)	1/316	0.249333	0.273079	0	0	3.67264	5.10118	CD2AP
469	Immune System R-HSA-168256	3/1943	0.251867	0.275795	0	0	1.86	2.56467	CAPZB;SOS1;DZIP3
148	Organelle Assembly (GO:0070925)	1/322	0.253443	0.275705	0	0	3.6029	4.9454	FXR1
149	Protein-Containing Complex Assembly (GO:0065003)	1/328	0.257531	0.278272	0	0	3.53571	4.79659	CD2AP
267	Human papillomavirus infection	1/331	0.259568	0.26995	0	0	3.50303	4.72467	SOS1
150	Regulation Of Gene Expression (GO:0010468)	2/1127	0.269547	0.289314	0	0	2.09522	2.74686	AHNAK2;UBAP2
151	Regulation Of Transcription By RNA Polymerase II (GO:0006357)	3/2028	0.273241	0.291336	0	0	1.77353	2.30098	CNOT1;AGO2;SOS1
268	PI3K-Akt signaling pathway	1/354	0.275005	0.280397	0	0	3.27095	4.22269	SOS1
470	SARS-CoV Infections R-HSA-9679506	1/369	0.284909	0.310423	0	0	3.13523	3.93655	SOS1
152	Positive Regulation Of Protein Phosphorylation (GO:0001934)	1/377	0.290138	0.307317	0	0	3.06727	3.79544	FXR1
471	Class I MHC Mediated Antigen Processing And Presentation R-HSA-983169	1/378	0.290789	0.315262	0	0	3.05898	3.77832	DZIP3
177	Intracellular Non-Membrane-Bounded Organelle (GO:0043232)	2/1195	0.292751	0.365939	0	0	1.96867	2.41838	FXR1;CAPZB
153	Positive Regulation Of Multicellular Organismal Process (GO:0051240)	1/387	0.296624	0.312134	0	0	2.98628	3.6292	AGO2
213	Ubiquitin-Protein Transferase Activity (GO:0004842)	1/412	0.312596	0.349243	0	0	2.80106	3.2572	DZIP3
178	Intracellular Membrane-Bounded Organelle (GO:0043231)	6/5175	0.313138	0.368397	0	0	1.43287	1.66372	FXR1;AHNAK2;AGO2;UBAP2;ELAVL1;TNRC6A
154	Organelle Organization (GO:0006996)	1/418	0.316378	0.330758	0	0	2.75991	3.17616	CAPZB
214	GTPase Regulator Activity (GO:0030695)	1/424	0.32014	0.349243	0	0	2.71993	3.09799	SOS1
155	Protein Ubiquitination (GO:0016567)	1/434	0.326367	0.339	0	0	2.65575	2.97374	DZIP3
472	Signaling By Interleukins R-HSA-449147	1/453	0.33805	0.364694	0	0	2.54164	2.75657	SOS1
215	Kinase Binding (GO:0019900)	1/460	0.342305	0.360761	0	0	2.50199	2.68226	ELAVL1
216	Transcription Cis-Regulatory Region Binding (GO:0000976)	1/474	0.35074	0.360761	0	0	2.42619	2.54195	AGO2
473	Signaling By Receptor Tyrosine Kinases R-HSA-9006934	1/496	0.363787	0.390536	0	0	2.31575	2.34165	SOS1
217	Protein Kinase Binding (GO:0019901)	1/511	0.372541	0.372541	0	0	2.24591	2.21762	ELAVL1
474	Axon Guidance R-HSA-422475	1/519	0.377163	0.402921	0	0	2.21031	2.15522	SOS1
179	Nucleus (GO:0005634)	5/4487	0.378598	0.420665	0	0	1.33011	1.29191	FXR1;AHNAK2;AGO2;UBAP2;ELAVL1
269	Pathways in cancer	1/531	0.384036	0.384036	0	0	2.15893	2.06614	SOS1
475	Nervous System Development R-HSA-9675108	1/545	0.391964	0.416699	0	0	2.10186	1.96857	SOS1
476	Membrane Trafficking R-HSA-199991	1/599	0.421648	0.446092	0	0	1.90675	1.64664	CAPZB
477	Sensory Perception R-HSA-9709957	1/616	0.430707	0.452975	0	0	1.85242	1.56034	CAPZB
478	GPCR Downstream Signaling R-HSA-388396	1/619	0.432291	0.452975	0	0	1.84314	1.54576	SOS1
479	Vesicle-mediated Transport R-HSA-5653656	1/637	0.441711	0.460642	0	0	1.78931	1.46204	CAPZB
480	Cell Cycle R-HSA-1640170	1/654	0.450472	0.467552	0	0	1.74119	1.38853	MIS18BP1
481	Signaling By GPCR R-HSA-372790	1/689	0.468103	0.483559	0	0	1.64962	1.25218	SOS1
482	Disease R-HSA-1643685	2/1736	0.471262	0.484537	0	0	1.31546	0.989672	FXR1;SOS1
483	Cytokine Signaling In Immune System R-HSA-1280215	1/702	0.474514	0.485601	0	0	1.61794	1.20612	SOS1
156	Negative Regulation Of Transcription By RNA Polymerase II (GO:0000122)	1/763	0.503635	0.517894	0	0	1.48371	1.01768	CNOT1
157	Regulation Of Cell Population Proliferation (GO:0042127)	1/766	0.505027	0.517894	0	0	1.47766	1.00945	SOS1
180	Nucleolus (GO:0005730)	1/771	0.507339	0.511475	0	0	1.46769	0.995935	FXR1
181	Nuclear Lumen (GO:0031981)	1/780	0.511475	0.511475	0	0	1.45005	0.972195	FXR1
158	Positive Regulation Of Transcription By RNA Polymerase II (GO:0045944)	1/938	0.578954	0.589947	0	0	1.19562	0.653444	AGO2
484	Infectious Disease R-HSA-5663205	1/961	0.588009	0.598949	0	0	1.16556	0.618929	SOS1
159	Negative Regulation Of DNA-templated Transcription (GO:0045892)	1/1025	0.612248	0.61995	0	0	1.08904	0.534301	CNOT1
485	Innate Immune System R-HSA-168249	1/1035	0.615912	0.624466	0	0	1.07794	0.522424	SOS1
486	Developmental Biology R-HSA-1266738	1/1073	0.629537	0.635339	0	0	1.03764	0.48019	SOS1
160	Positive Regulation Of DNA-templated Transcription (GO:0045893)	1/1243	0.685093	0.689375	0	0	0.887563	0.335676	AGO2
487	Post-translational Protein Modification R-HSA-597592	1/1383	0.724838	0.728163	0	0	0.791691	0.254772	CAPZB
488	Metabolism Of Proteins R-HSA-392499	1/1890	0.832641	0.832641	0	0	0.563417	0.103191	CAPZB
161	Regulation Of DNA-templated Transcription (GO:0006355)	1/1922	0.837887	0.837887	0	0	0.553051	0.097819	SOS1

## Sheet: Cluster7
	Term	Overlap	P.value	Adjusted.P.value	Old.P.value	Old.Adjusted.P.value	Odds.Ratio	Combined.Score	Genes
1	Regulation Of Protein Polymerization (GO:0032271)	3/33	1.837e-06	0.000378423	0	0	166.292	2196.28	CAMSAP3;LATS1;CAMSAP2
295	Intraflagellar Transport R-HSA-5620924	3/41	3.57628e-06	0.000300408	0	0	131.23	1645.78	IFT74;DYNLL1;DYNLL2
207	Cilium (GO:0005929)	4/257	3.25207e-05	0.00136587	0	0	28.3608	293.07	CAMSAP3;IFT74;DYNLL1;DYNLL2
249	Microtubule Minus-End Binding (GO:0051011)	2/12	3.45001e-05	0.001311	0	0	307.308	3157.45	CAMSAP3;CAMSAP2
2	Regulation Of Golgi Organization (GO:1903358)	2/16	6.26192e-05	0.00644978	0	0	219.462	2124.05	CAMSAP3;CAMSAP2
296	Signaling By Hippo R-HSA-2028269	2/20	9.89758e-05	0.00401875	0	0	170.658	1573.58	LATS1;AMOT
208	Cytoplasmic Dynein Complex (GO:0005868)	2/21	0.000109347	0.00229629	0	0	161.668	1474.57	DYNLL1;DYNLL2
3	Regulation Of Supramolecular Fiber Organization (GO:1902903)	2/24	0.000143527	0.00769189	0	0	139.601	1235.33	CAMSAP3;CAMSAP2
297	Aggrephagy R-HSA-9646399	2/24	0.000143527	0.00401875	0	0	139.601	1235.33	DYNLL1;DYNLL2
4	Regulation Of Microtubule Polymerization Or Depolymerization (GO:0031110)	2/27	0.000182292	0.00769189	0	0	122.831	1057.56	CAMSAP3;CAMSAP2
5	Regulation Of Cellular Component Organization (GO:0051128)	3/153	0.000186696	0.00769189	0	0	33.0583	283.84	CAMSAP3;LATS1;CAMSAP2
298	Activation Of BH3-only Proteins R-HSA-114452	2/30	0.000225624	0.00436043	0	0	109.654	920.724	DYNLL1;DYNLL2
299	COPI-independent Golgi-to-ER Retrograde Traffic R-HSA-6811436	2/34	0.000290474	0.00436043	0	0	95.9279	781.236	DYNLL1;DYNLL2
300	Cilium Assembly R-HSA-5617833	3/186	0.00033164	0.00436043	0	0	27.0519	216.725	IFT74;DYNLL1;DYNLL2
301	HSP90 Chaperone Cycle For Steroid Hormone Receptors (SHR) In Presence Of Ligand R-HSA-3371497	2/38	0.000363369	0.00436043	0	0	85.2521	675.205	DYNLL1;DYNLL2
6	Regulation Of Microtubule Polymerization (GO:0031113)	2/40	0.00040282	0.0138302	0	0	80.7571	631.28	CAMSAP3;CAMSAP2
287	Vasopressin-regulated water reabsorption	2/44	0.000487704	0.00310622	0	0	73.0513	557.075	DYNLL1;DYNLL2
7	Regulation Of Focal Adhesion Assembly (GO:0051893)	2/54	0.000734556	0.0216169	0	0	58.9734	425.566	CAMSAP3;DYNLL1
302	Intrinsic Pathway For Apoptosis R-HSA-109606	2/55	0.000761945	0.00800042	0	0	57.8578	415.398	DYNLL1;DYNLL2
288	Salmonella infection	3/249	0.000776556	0.00310622	0	0	20.06	143.642	DYNLL1;PIK3C2A;DYNLL2
303	Selective Autophagy R-HSA-9663891	2/61	0.000936527	0.00869472	0	0	51.9583	362.322	DYNLL1;DYNLL2
304	Organelle Biogenesis And Maintenance R-HSA-1852241	3/275	0.00103509	0.00869472	0	0	18.1186	124.534	IFT74;DYNLL1;DYNLL2
209	Motile Cilium (GO:0031514)	2/73	0.00133795	0.0131419	0	0	43.1506	285.511	CAMSAP3;IFT74
210	Clathrin-Coated Vesicle (GO:0030136)	2/78	0.00152556	0.0131419	0	0	40.3016	261.372	SNX3;PIK3C2A
211	Coated Vesicle (GO:0030135)	2/79	0.00156451	0.0131419	0	0	39.7762	256.962	SNX3;PIK3C2A
305	COPI-mediated Anterograde Transport R-HSA-6807878	2/80	0.00160393	0.0122482	0	0	39.2643	252.678	DYNLL1;DYNLL2
212	Tight Junction (GO:0070160)	2/93	0.00215921	0.0151145	0	0	33.6331	206.441	SIPA1L3;AMOT
306	Unattached Kinetochores Signal Amplification Via A MAD2 Inhibitory Signal R-HSA-141444	2/93	0.00215921	0.0140756	0	0	33.6331	206.441	DYNLL1;DYNLL2
307	HCMV Early Events R-HSA-9609690	2/96	0.00229856	0.0140756	0	0	32.5548	197.786	DYNLL1;DYNLL2
308	EML4 And NUDC In Mitotic Spindle Formation R-HSA-9648025	2/97	0.00234594	0.0140756	0	0	32.2105	195.037	DYNLL1;DYNLL2
8	Regulation Of Organelle Organization (GO:0033043)	2/100	0.00249083	0.053197	0	0	31.2198	187.167	CAMSAP3;CAMSAP2
309	MHC Class II Antigen Presentation R-HSA-2132295	2/104	0.00269047	0.0142426	0	0	29.9894	177.479	DYNLL1;DYNLL2
213	Apical Junction Complex (GO:0043296)	2/106	0.00279304	0.0167583	0	0	29.4098	172.948	CAMSAP3;AMOT
310	Resolution Of Sister Chromatid Cohesion R-HSA-2500257	2/106	0.00279304	0.0142426	0	0	29.4098	172.948	DYNLL1;DYNLL2
311	Mitotic Spindle Checkpoint R-HSA-69618	2/110	0.00300366	0.0142426	0	0	28.3148	164.45	DYNLL1;DYNLL2
312	Golgi-to-ER Retrograde Transport R-HSA-8856688	2/112	0.00311169	0.0142426	0	0	27.7972	160.462	DYNLL1;DYNLL2
9	Regulation Of Cytoskeleton Organization (GO:0051493)	2/114	0.00322153	0.053197	0	0	27.2981	156.634	CAMSAP3;DYNLL1
313	Macroautophagy R-HSA-1632852	2/114	0.00322153	0.0142426	0	0	27.2981	156.634	DYNLL1;DYNLL2
10	Regulation Of Small GTPase Mediated Signal Transduction (GO:0051056)	2/118	0.00344664	0.053197	0	0	26.3515	149.422	PLEKHG1;DYNLL1
314	RHO GTPases Activate Formins R-HSA-5663220	2/119	0.00350404	0.0144808	0	0	26.1249	147.706	DYNLL1;DYNLL2
250	GTPase Regulator Activity (GO:0030695)	3/424	0.00356067	0.0474328	0	0	11.6176	65.4977	PLEKHG1;DYNLL1;SIPA1L3
315	HCMV Infection R-HSA-9609646	2/121	0.00362019	0.0144808	0	0	25.6833	144.371	DYNLL1;DYNLL2
11	Regulation Of Cell Motility (GO:2000145)	2/123	0.00373813	0.053197	0	0	25.2562	141.161	CAMSAP3;AMOT
251	Phosphatidylinositol-4,5-Bisphosphate 3-Kinase Activity (GO:0046934)	1/5	0.0037447	0.0474328	0	0	356.804	1993.61	PIK3C2A
12	Regulation Of Cell Migration (GO:0030334)	3/434	0.003802	0.053197	0	0	11.3422	63.2015	CAMSAP3;DYNLL1;AMOT
316	Autophagy R-HSA-9612973	2/128	0.00404076	0.0154284	0	0	24.2479	133.638	DYNLL1;DYNLL2
317	ER To Golgi Anterograde Transport R-HSA-199977	2/133	0.00435448	0.0159033	0	0	23.3165	126.761	DYNLL1;DYNLL2
13	Membrane Invagination (GO:0010324)	1/6	0.00449207	0.053197	0	0	285.429	1542.87	SNX3
14	Vascular Associated Smooth Muscle Contraction (GO:0014829)	1/6	0.00449207	0.053197	0	0	285.429	1542.87	PIK3C2A
15	Intraciliary Transport Involved In Cilium Assembly (GO:0035735)	1/6	0.00449207	0.053197	0	0	285.429	1542.87	IFT74
16	Mammary Gland Epithelial Cell Differentiation (GO:0060644)	1/7	0.00523892	0.053197	0	0	237.845	1249.08	LATS1
17	Positive Regulation Of Execution Phase Of Apoptosis (GO:1900119)	1/7	0.00523892	0.053197	0	0	237.845	1249.08	DYNLL1
18	Regulation Of Organ Growth (GO:0046620)	1/8	0.00598524	0.053197	0	0	203.857	1043.43	LATS1
214	9+0 Non-Motile Cilium (GO:0097731)	1/8	0.00598524	0.0314225	0	0	203.857	1043.43	DYNLL2
252	Phosphatidylinositol Bisphosphate Kinase Activity (GO:0052813)	1/8	0.00598524	0.050401	0	0	203.857	1043.43	PIK3C2A
289	Hippo signaling pathway	2/163	0.00646519	0.0172405	0	0	18.9431	95.4985	LATS1;AMOT
318	Signal Transduction R-HSA-162582	6/2465	0.00647229	0.0219817	0	0	4.75153	23.9488	LATS1;SNX3;PLEKHG1;DYNLL1;DYNLL2;AMOT
319	Transport To Golgi And Subsequent Modification R-HSA-948021	2/164	0.00654218	0.0219817	0	0	18.8253	94.6814	DYNLL1;DYNLL2
19	Negative Regulation Of Establishment Of Protein Localization (GO:1904950)	1/9	0.00673105	0.053197	0	0	178.366	892.013	SNX3
20	Microtubule Anchoring (GO:0034453)	1/9	0.00673105	0.053197	0	0	178.366	892.013	CAMSAP3
21	Vasoconstriction (GO:0042310)	1/9	0.00673105	0.053197	0	0	178.366	892.013	PIK3C2A
253	1-Phosphatidylinositol-3-Kinase Activity (GO:0016303)	1/9	0.00673105	0.050401	0	0	178.366	892.013	PIK3C2A
22	Membrane Organization (GO:0061024)	2/167	0.00677567	0.053197	0	0	18.4802	92.2978	SNX3;PIK3C2A
320	Separation Of Sister Chromatids R-HSA-2467813	2/170	0.00701294	0.0226572	0	0	18.1474	90.0112	DYNLL1;DYNLL2
23	Regulation Of Neuron Projection Development (GO:0010975)	2/174	0.00733516	0.053197	0	0	17.7218	87.1041	SNX3;CAMSAP2
321	Apoptosis R-HSA-109581	2/178	0.00766402	0.0233564	0	0	17.3156	84.3479	DYNLL1;DYNLL2
322	Intra-Golgi And Retrograde Golgi-to-ER Traffic R-HSA-6811442	2/181	0.00791501	0.0233564	0	0	17.0228	82.3731	DYNLL1;DYNLL2
24	Epithelial Cell-Cell Adhesion (GO:0090136)	1/11	0.00822109	0.053197	0	0	142.679	685.007	CAMSAP3
25	Phosphatidylinositol-3-Phosphate Biosynthetic Process (GO:0036092)	1/11	0.00822109	0.053197	0	0	142.679	685.007	PIK3C2A
215	Early Phagosome (GO:0032009)	1/11	0.00822109	0.0383651	0	0	142.679	685.007	SNX3
254	Phosphatidylinositol 3-Kinase Activity (GO:0035004)	1/11	0.00822109	0.050401	0	0	142.679	685.007	PIK3C2A
323	Synthesis Of PIPs At Late Endosome Membrane R-HSA-1660517	1/11	0.00822109	0.0233564	0	0	142.679	685.007	PIK3C2A
324	Mitotic Prometaphase R-HSA-68877	2/186	0.00834155	0.0233564	0	0	16.556	79.2455	DYNLL1;DYNLL2
26	Epithelial Cell Morphogenesis (GO:0003382)	1/12	0.00896533	0.053197	0	0	129.701	611.463	SIPA1L3
325	Membrane Trafficking R-HSA-199991	3/599	0.00929516	0.0251869	0	0	8.13297	38.0482	DYNLL1;PIK3C2A;DYNLL2
27	Clathrin Coat Assembly (GO:0048268)	1/13	0.00970904	0.053197	0	0	118.887	551.005	PIK3C2A
28	Cytoplasmic Sequestering Of Protein (GO:0051220)	1/13	0.00970904	0.053197	0	0	118.887	551.005	LATS1
29	Intraciliary Retrograde Transport (GO:0035721)	1/13	0.00970904	0.053197	0	0	118.887	551.005	DYNLL1
326	Programmed Cell Death R-HSA-5357801	2/208	0.0103388	0.0271393	0	0	14.7715	67.533	DYNLL1;DYNLL2
30	Mammary Gland Epithelium Development (GO:0061180)	1/14	0.0104522	0.053197	0	0	109.736	500.5	LATS1
31	Smooth Muscle Contraction (GO:0006939)	1/14	0.0104522	0.053197	0	0	109.736	500.5	PIK3C2A
255	GTPase Activator Activity (GO:0005096)	2/211	0.0106261	0.050401	0	0	14.5572	66.1545	DYNLL1;SIPA1L3
327	Vesicle-mediated Transport R-HSA-5653656	3/637	0.0109915	0.0276571	0	0	7.63052	34.4184	DYNLL1;PIK3C2A;DYNLL2
32	Negative Regulation Of Focal Adhesion Assembly (GO:0051895)	1/15	0.0111949	0.053197	0	0	101.893	457.733	DYNLL1
33	Platelet-Derived Growth Factor Receptor Signaling Pathway (GO:0048008)	1/15	0.0111949	0.053197	0	0	101.893	457.733	PIK3C2A
34	Negative Regulation Of Phagocytosis (GO:0050765)	1/15	0.0111949	0.053197	0	0	101.893	457.733	SNX3
35	Negative Regulation Of Cell-Substrate Junction Organization (GO:0150118)	1/15	0.0111949	0.053197	0	0	101.893	457.733	DYNLL1
328	Signaling By Rho GTPases R-HSA-194315	3/644	0.0113226	0.0276571	0	0	7.54446	33.8064	PLEKHG1;DYNLL1;DYNLL2
36	Positive Regulation Of Cell Migration Involved In Sprouting Angiogenesis (GO:0090050)	1/16	0.0119371	0.053197	0	0	95.0952	421.092	PIK3C2A
37	Intraciliary Anterograde Transport (GO:0035720)	1/16	0.0119371	0.053197	0	0	95.0952	421.092	IFT74
38	Regulation Of Nucleocytoplasmic Transport (GO:0046822)	1/16	0.0119371	0.053197	0	0	95.0952	421.092	PTPN14
39	Nuclear Chromosome Segregation (GO:0098813)	1/16	0.0119371	0.053197	0	0	95.0952	421.092	LATS1
256	Phosphatidylinositol Kinase Activity (GO:0052742)	1/16	0.0119371	0.050401	0	0	95.0952	421.092	PIK3C2A
257	Phosphatidylinositol-5-Phosphate Binding (GO:0010314)	1/16	0.0119371	0.050401	0	0	95.0952	421.092	SNX3
329	Synthesis Of PIPs At Early Endosome Membrane R-HSA-1660516	1/16	0.0119371	0.0276571	0	0	95.0952	421.092	PIK3C2A
330	Signaling By Rho GTPases, Miro GTPases And RHOBTB3 R-HSA-9716542	3/660	0.0121011	0.0276571	0	0	7.35464	32.4668	PLEKHG1;DYNLL1;DYNLL2
40	Motile Cilium Assembly (GO:0044458)	1/17	0.0126787	0.053197	0	0	89.1473	389.38	DYNLL1
41	Hippo Signaling (GO:0035329)	1/17	0.0126787	0.053197	0	0	89.1473	389.38	LATS1
42	Negative Regulation Of Rho Protein Signal Transduction (GO:0035024)	1/17	0.0126787	0.053197	0	0	89.1473	389.38	DYNLL1
43	Embryo Development Ending In Birth Or Egg Hatching (GO:0009792)	1/17	0.0126787	0.053197	0	0	89.1473	389.38	CAMSAP3
331	Synthesis Of PIPs At Golgi Membrane R-HSA-1660514	1/17	0.0126787	0.0276571	0	0	89.1473	389.38	PIK3C2A
332	Mitotic Anaphase R-HSA-68882	2/232	0.0127361	0.0276571	0	0	13.214	57.6571	DYNLL1;DYNLL2
333	Mitotic Metaphase And Anaphase R-HSA-2555396	2/233	0.0128408	0.0276571	0	0	13.1562	57.2968	DYNLL1;DYNLL2
44	Epithelial Cell Development (GO:0002064)	1/18	0.0134198	0.053197	0	0	83.8992	361.691	SIPA1L3
45	Negative Regulation Of Viral Entry Into Host Cell (GO:0046597)	1/18	0.0134198	0.053197	0	0	83.8992	361.691	SNX3
258	Microtubule Binding (GO:0008017)	2/239	0.0134772	0.0512132	0	0	12.8192	55.2093	CAMSAP3;CAMSAP2
46	Cilium Assembly (GO:0060271)	2/243	0.013909	0.053197	0	0	12.6039	53.8844	IFT74;DYNLL1
47	Establishment Of Epithelial Cell Polarity (GO:0090162)	1/19	0.0141604	0.053197	0	0	79.2341	337.324	SIPA1L3
48	Regulation Of Early Endosome To Late Endosome Transport (GO:2000641)	1/19	0.0141604	0.053197	0	0	79.2341	337.324	SNX3
49	Negative Regulation Of Cyclin-Dependent Protein Serine/Threonine Kinase Activity (GO:0045736)	1/19	0.0141604	0.053197	0	0	79.2341	337.324	LATS1
50	Negative Regulation Of Microtubule Depolymerization (GO:0007026)	1/20	0.0149005	0.053197	0	0	75.0602	315.73	CAMSAP2
51	Transport Along Microtubule (GO:0010970)	1/20	0.0149005	0.053197	0	0	75.0602	315.73	CAMSAP3
52	Negative Regulation Of Phosphate Metabolic Process (GO:0045936)	1/20	0.0149005	0.053197	0	0	75.0602	315.73	DYNLL1
53	Ameboidal-Type Cell Migration (GO:0001667)	1/20	0.0149005	0.053197	0	0	75.0602	315.73	AMOT
54	Negative Regulation Of Viral Life Cycle (GO:1903901)	1/20	0.0149005	0.053197	0	0	75.0602	315.73	SNX3
55	Negative Regulation Of Cyclin-Dependent Protein Kinase Activity (GO:1904030)	1/20	0.0149005	0.053197	0	0	75.0602	315.73	LATS1
56	Focal Adhesion Assembly (GO:0048041)	1/21	0.0156401	0.053197	0	0	71.3036	296.475	DYNLL1
57	Regulation Of Cell-Substrate Junction Assembly (GO:0090109)	1/21	0.0156401	0.053197	0	0	71.3036	296.475	CAMSAP3
259	Lipid Kinase Activity (GO:0001727)	1/21	0.0156401	0.0540293	0	0	71.3036	296.475	PIK3C2A
334	Interleukin-37 Signaling R-HSA-9008059	1/21	0.0156401	0.0328441	0	0	71.3036	296.475	PTPN14
58	Regulation Of Protein Export From Nucleus (GO:0046825)	1/22	0.0163791	0.053197	0	0	67.9048	279.207	PTPN14
59	Negative Regulation Of Protein Localization To Nucleus (GO:1900181)	1/22	0.0163791	0.053197	0	0	67.9048	279.207	LATS1
60	Regulation Of Intracellular Steroid Hormone Receptor Signaling Pathway (GO:0033143)	1/22	0.0163791	0.053197	0	0	67.9048	279.207	LATS1
61	Regulation Of Catabolic Process (GO:0009894)	1/22	0.0163791	0.053197	0	0	67.9048	279.207	LATS1
335	RHO GTPase Effectors R-HSA-195258	2/269	0.0168612	0.0341972	0	0	11.3616	46.3863	DYNLL1;DYNLL2
62	Positive Regulation Of Apoptotic Process (GO:0043065)	2/270	0.0169797	0.053197	0	0	11.3186	46.1316	LATS1;DYNLL1
336	Cell Cycle Checkpoints R-HSA-69620	2/271	0.0170986	0.0341972	0	0	11.276	45.8791	DYNLL1;DYNLL2
63	Regulation Of Cellular Response To Transforming Growth Factor Beta Stimulus (GO:1903844)	1/23	0.0171176	0.053197	0	0	64.8149	263.644	LATS1
64	Negative Regulation Of Protein Depolymerization (GO:1901880)	1/23	0.0171176	0.053197	0	0	64.8149	263.644	CAMSAP2
65	Regulation Of Proteolysis Involved In Protein Catabolic Process (GO:1903050)	1/24	0.0178556	0.053197	0	0	61.9938	249.552	LATS1
66	Cell Morphogenesis Involved In Differentiation (GO:0000904)	1/24	0.0178556	0.053197	0	0	61.9938	249.552	SIPA1L3
67	Regulation Of Execution Phase Of Apoptosis (GO:1900117)	1/24	0.0178556	0.053197	0	0	61.9938	249.552	DYNLL1
68	Regulation Of Microtubule Depolymerization (GO:0031114)	1/24	0.0178556	0.053197	0	0	61.9938	249.552	CAMSAP2
69	Negative Regulation Of Cell Junction Assembly (GO:1901889)	1/24	0.0178556	0.053197	0	0	61.9938	249.552	DYNLL1
260	Phosphatidylinositol-3,5-Bisphosphate Binding (GO:0080025)	1/24	0.0178556	0.0543491	0	0	61.9938	249.552	SNX3
337	Asparagine N-linked Glycosylation R-HSA-446203	2/282	0.0184299	0.0360025	0	0	10.8269	43.2404	DYNLL1;DYNLL2
70	Regulation Of Intracellular Estrogen Receptor Signaling Pathway (GO:0033146)	1/25	0.0185931	0.053197	0	0	59.4077	236.738	LATS1
71	Negative Regulation Of Protein Transport (GO:0051224)	1/25	0.0185931	0.053197	0	0	59.4077	236.738	SNX3
72	Negative Regulation Of Stress Fiber Assembly (GO:0051497)	1/25	0.0185931	0.053197	0	0	59.4077	236.738	DYNLL1
261	Phosphatidylinositol-4-Phosphate Binding (GO:0070273)	1/25	0.0185931	0.0543491	0	0	59.4077	236.738	SNX3
338	WNT Ligand Biogenesis And Trafficking R-HSA-3238698	1/26	0.0193301	0.0369029	0	0	57.0286	225.04	SNX3
73	Regulation Of Actin Polymerization Or Depolymerization (GO:0008064)	1/27	0.0200666	0.0547755	0	0	54.8324	214.324	LATS1
74	Regulation Of Intracellular Signal Transduction (GO:1902531)	2/297	0.0203145	0.0547755	0	0	10.2686	40.0107	PLEKHG1;DYNLL1
75	Regulation Of Protein Transport (GO:0051223)	1/28	0.0208025	0.0547755	0	0	52.7989	204.474	SNX3
76	Cell-Substrate Junction Assembly (GO:0007044)	1/28	0.0208025	0.0547755	0	0	52.7989	204.474	DYNLL1
77	Negative Regulation Of Actin Filament Bundle Assembly (GO:0032232)	1/28	0.0208025	0.0547755	0	0	52.7989	204.474	DYNLL1
78	Primary Neural Tube Formation (GO:0014020)	1/28	0.0208025	0.0547755	0	0	52.7989	204.474	DYNLL1
79	Regulation Of Developmental Growth (GO:0048638)	1/29	0.0215379	0.0547755	0	0	50.9107	195.392	LATS1
80	Tube Closure (GO:0060606)	1/29	0.0215379	0.0547755	0	0	50.9107	195.392	DYNLL1
81	Positive Regulation Of Dephosphorylation (GO:0035306)	1/29	0.0215379	0.0547755	0	0	50.9107	195.392	DYNLL1
82	Regulation Of Cell Migration Involved In Sprouting Angiogenesis (GO:0090049)	1/30	0.0222728	0.0554037	0	0	49.1527	186.996	PIK3C2A
216	Non-Motile Cilium (GO:0097730)	1/30	0.0222728	0.0928464	0	0	49.1527	186.996	DYNLL2
83	Negative Regulation Of Microtubule Polymerization Or Depolymerization (GO:0031111)	1/31	0.0230072	0.0554037	0	0	47.5119	179.212	CAMSAP2
84	Regulation Of Transmembrane Receptor Protein Serine/Threonine Kinase Signaling Pathway (GO:0090092)	1/31	0.0230072	0.0554037	0	0	47.5119	179.212	LATS1
85	Negative Regulation Of Cell-Matrix Adhesion (GO:0001953)	1/31	0.0230072	0.0554037	0	0	47.5119	179.212	DYNLL1
262	SH2 Domain Binding (GO:0042169)	1/31	0.0230072	0.0598674	0	0	47.5119	179.212	DYNLL1
86	Phosphatidylinositol 3-Kinase Signaling (GO:0014065)	1/32	0.0237411	0.0554037	0	0	45.977	171.979	PIK3C2A
87	Vesicle Budding From Membrane (GO:0006900)	1/32	0.0237411	0.0554037	0	0	45.977	171.979	SNX3
88	Neural Tube Closure (GO:0001843)	1/32	0.0237411	0.0554037	0	0	45.977	171.979	DYNLL1
263	Beta-Tubulin Binding (GO:0048487)	1/32	0.0237411	0.0598674	0	0	45.977	171.979	IFT74
217	Actin Cytoskeleton (GO:0015629)	2/327	0.0243169	0.0928464	0	0	9.30651	34.5884	DYNLL1;AMOT
89	Protein-Containing Complex Assembly (GO:0065003)	2/328	0.0244556	0.0554037	0	0	9.27749	34.4278	WDCP;PIK3C2A
90	Negative Regulation Of Endocytosis (GO:0045806)	1/33	0.0244745	0.0554037	0	0	44.5379	165.241	SNX3
91	Positive Regulation Of Protein Dephosphorylation (GO:0035307)	1/33	0.0244745	0.0554037	0	0	44.5379	165.241	DYNLL1
92	Negative Regulation Of Ras Protein Signal Transduction (GO:0046580)	1/34	0.0252073	0.0558356	0	0	43.1861	158.952	DYNLL1
93	Sister Chromatid Segregation (GO:0000819)	1/34	0.0252073	0.0558356	0	0	43.1861	158.952	LATS1
264	Nuclear Estrogen Receptor Binding (GO:0030331)	1/34	0.0252073	0.0598674	0	0	43.1861	158.952	LATS1
94	Regulation Of Intracellular Protein Transport (GO:0033157)	1/36	0.0266715	0.0584503	0	0	40.7143	147.555	PTPN14
95	Regulation Of Cellular Component Biogenesis (GO:0044087)	1/37	0.0274028	0.0592282	0	0	39.5813	142.378	LATS1
96	G2/M Transition Of Mitotic Cell Cycle (GO:0000086)	1/38	0.0281336	0.0592282	0	0	38.5097	137.51	LATS1
97	Negative Regulation Of Transport (GO:0051051)	1/39	0.0288639	0.0592282	0	0	37.4944	132.924	SNX3
98	Regulation Of Protein Dephosphorylation (GO:0035304)	1/40	0.0295936	0.0592282	0	0	36.5311	128.597	DYNLL1
99	Establishment Or Maintenance Of Epithelial Cell Apical/Basal Polarity (GO:0045197)	1/40	0.0295936	0.0592282	0	0	36.5311	128.597	CAMSAP3
100	Cell Cycle G2/M Phase Transition (GO:0044839)	1/40	0.0295936	0.0592282	0	0	36.5311	128.597	LATS1
101	Negative Regulation Of Protein Localization (GO:1903828)	1/40	0.0295936	0.0592282	0	0	36.5311	128.597	LATS1
102	Regulation Of Microtubule Cytoskeleton Organization (GO:0070507)	1/40	0.0295936	0.0592282	0	0	36.5311	128.597	CAMSAP3
265	Phosphatidylinositol-3-Phosphate Binding (GO:0032266)	1/40	0.0295936	0.0661505	0	0	36.5311	128.597	SNX3
103	Regulation Of Dendrite Development (GO:0050773)	1/41	0.0303229	0.0592282	0	0	35.6161	124.509	CAMSAP2
104	Visual System Development (GO:0150063)	1/41	0.0303229	0.0592282	0	0	35.6161	124.509	SIPA1L3
105	Regulation Of Microtubule-Based Process (GO:0032886)	1/41	0.0303229	0.0592282	0	0	35.6161	124.509	CAMSAP3
106	Substantia Nigra Development (GO:0021762)	1/42	0.0310517	0.0592282	0	0	34.7456	120.64	DYNLL1
107	DNA Integrity Checkpoint Signaling (GO:0031570)	1/42	0.0310517	0.0592282	0	0	34.7456	120.64	CAMSAP3
108	Regulation Of Ubiquitin-Dependent Protein Catabolic Process (GO:2000058)	1/42	0.0310517	0.0592282	0	0	34.7456	120.64	LATS1
109	DNA-templated DNA Replication Maintenance Of Fidelity (GO:0045005)	1/43	0.0317799	0.0597908	0	0	33.9167	116.976	CAMSAP3
110	Negative Regulation Of Cell Population Proliferation (GO:0008285)	2/379	0.0319558	0.0597908	0	0	8.00163	27.5528	DYNLL1;PTPN14
339	M Phase R-HSA-68886	2/380	0.032111	0.0599406	0	0	7.98006	27.4399	DYNLL1;DYNLL2
111	Phosphatidylinositol Phosphate Biosynthetic Process (GO:0046854)	1/44	0.0325076	0.0597908	0	0	33.1262	113.5	PIK3C2A
112	Regulation Of Viral Entry Into Host Cell (GO:0046596)	1/44	0.0325076	0.0597908	0	0	33.1262	113.5	SNX3
218	Cortical Actin Cytoskeleton (GO:0030864)	1/44	0.0325076	0.113777	0	0	33.1262	113.5	DYNLL1
113	Epidermal Growth Factor Receptor Signaling Pathway (GO:0007173)	1/45	0.0332348	0.0600559	0	0	32.3718	110.199	PIK3C2A
114	Chromosome Organization (GO:0051276)	1/45	0.0332348	0.0600559	0	0	32.3718	110.199	LATS1
115	Positive Regulation Of Blood Vessel Endothelial Cell Migration (GO:0043536)	1/46	0.0339615	0.0608355	0	0	31.6508	107.06	PIK3C2A
116	Insulin Receptor Signaling Pathway (GO:0008286)	1/47	0.0346877	0.0616006	0	0	30.9612	104.072	PIK3C2A
340	Synthesis Of PIPs At Plasma Membrane R-HSA-1660499	1/51	0.0375874	0.0686379	0	0	28.4786	93.4406	PIK3C2A
117	Regulation Of Protein Localization To Nucleus (GO:1900180)	1/52	0.0383111	0.0668821	0	0	27.9188	91.0715	LATS1
118	Cell Cycle G1/S Phase Transition (GO:0044843)	1/52	0.0383111	0.0668821	0	0	27.9188	91.0715	LATS1
119	Endosome Organization (GO:0007032)	1/53	0.0390342	0.0675719	0	0	27.3805	88.8036	SNX3
120	ERBB Signaling Pathway (GO:0038127)	1/54	0.0397569	0.0676853	0	0	26.8625	86.6309	PIK3C2A
121	Negative Regulation Of Protein Catabolic Process (GO:0042177)	1/54	0.0397569	0.0676853	0	0	26.8625	86.6309	SNX3
341	Golgi Associated Vesicle Biogenesis R-HSA-432722	1/55	0.040479	0.0708383	0	0	26.3638	84.5478	PIK3C2A
342	Signaling By ALK Fusions And Activated Point Mutants R-HSA-9725370	1/55	0.040479	0.0708383	0	0	26.3638	84.5478	WDCP
122	Eye Development (GO:0001654)	1/58	0.0426424	0.0714173	0	0	24.9724	78.7857	SIPA1L3
123	Regulation Of Phagocytosis (GO:0050764)	1/58	0.0426424	0.0714173	0	0	24.9724	78.7857	SNX3
124	Heart Morphogenesis (GO:0003007)	1/59	0.0433625	0.0714613	0	0	24.5406	77.0125	DYNLL1
125	Cilium Movement (GO:0003341)	1/59	0.0433625	0.0714613	0	0	24.5406	77.0125	CAMSAP3
266	Receptor Tyrosine Kinase Binding (GO:0030971)	1/59	0.0433625	0.0909688	0	0	24.5406	77.0125	PTPN14
219	Ficolin-1-Rich Granule Membrane (GO:0101003)	1/60	0.0440821	0.129466	0	0	24.1235	75.3063	DYNLL1
267	Kinase Binding (GO:0019900)	2/460	0.0454844	0.0909688	0	0	6.55929	20.2707	LATS1;WDCP
126	Phosphatidylinositol-Mediated Signaling (GO:0048015)	1/62	0.0455197	0.074414	0	0	23.3302	72.0812	PIK3C2A
220	Caveola (GO:0005901)	1/62	0.0455197	0.129466	0	0	23.3302	72.0812	DYNLL1
127	G1/S Transition Of Mitotic Cell Cycle (GO:0000082)	1/63	0.0462378	0.074414	0	0	22.9528	70.5558	LATS1
128	Phosphatidylinositol Metabolic Process (GO:0046488)	1/63	0.0462378	0.074414	0	0	22.9528	70.5558	PIK3C2A
221	Cortical Cytoskeleton (GO:0030863)	1/63	0.0462378	0.129466	0	0	22.9528	70.5558	DYNLL1
129	Endocytic Recycling (GO:0032456)	1/64	0.0469554	0.0749831	0	0	22.5873	69.0845	SNX3
130	Regulation Of Cell-Matrix Adhesion (GO:0001952)	1/65	0.0476725	0.0755425	0	0	22.2333	67.6647	CAMSAP3
131	Activation Of Cysteine-Type Endopeptidase Activity Involved In Apoptotic Process (GO:0006919)	1/67	0.0491051	0.0772187	0	0	21.5574	64.9694	DYNLL1
343	Loss Of Nlp From Mitotic Centrosomes R-HSA-380259	1/69	0.0505358	0.0866327	0	0	20.9212	62.4514	DYNLL1
132	Regulation Of Actin Filament Polymerization (GO:0030833)	1/70	0.0512503	0.0787878	0	0	20.617	61.2537	LATS1
133	Regulation Of Actin Filament-Based Process (GO:0032970)	1/70	0.0512503	0.0787878	0	0	20.617	61.2537	DYNLL1
134	Sensory Organ Development (GO:0007423)	1/70	0.0512503	0.0787878	0	0	20.617	61.2537	SIPA1L3
135	Negative Regulation Of Supramolecular Fiber Organization (GO:1902904)	1/71	0.0519644	0.0792938	0	0	20.3214	60.0945	CAMSAP2
222	Actin Filament (GO:0005884)	1/71	0.0519644	0.130145	0	0	20.3214	60.0945	AMOT
344	trans-Golgi Network Vesicle Budding R-HSA-199992	1/71	0.0519644	0.0867637	0	0	20.3214	60.0945	PIK3C2A
136	Negative Regulation Of Catabolic Process (GO:0009895)	1/72	0.0526779	0.0797916	0	0	20.0342	58.9719	SNX3
223	Tertiary Granule Membrane (GO:0070821)	1/72	0.0526779	0.130145	0	0	20.0342	58.9719	DYNLL1
345	AURKA Activation By TPX2 R-HSA-8854518	1/72	0.0526779	0.0867637	0	0	20.0342	58.9719	DYNLL1
137	Regulation Of Rho Protein Signal Transduction (GO:0035023)	1/73	0.053391	0.0802813	0	0	19.755	57.8843	DYNLL1
290	Inositol phosphate metabolism	1/73	0.053391	0.106782	0	0	19.755	57.8843	PIK3C2A
138	Regulation Of Stress Fiber Assembly (GO:0051492)	1/75	0.0548156	0.0812375	0	0	19.2191	55.8081	DYNLL1
139	Negative Regulation Of Phosphorylation (GO:0042326)	1/75	0.0548156	0.0812375	0	0	19.2191	55.8081	DYNLL1
140	Regulation Of Ras Protein Signal Transduction (GO:0046578)	1/76	0.0555272	0.0817042	0	0	18.9619	54.8166	DYNLL1
268	Protein Tyrosine Phosphatase Activity (GO:0004725)	1/76	0.0555272	0.105502	0	0	18.9619	54.8166	PTPN14
141	Negative Regulation Of Blood Vessel Morphogenesis (GO:2000181)	1/77	0.0562382	0.0821636	0	0	18.7115	53.8546	AMOT
224	Glutamatergic Synapse (GO:0098978)	1/78	0.0569488	0.132159	0	0	18.4675	52.9206	DYNLL2
346	Cell Cycle, Mitotic R-HSA-69278	2/523	0.0572424	0.0913095	0	0	5.74753	16.4406	DYNLL1;DYNLL2
142	Regulation Of Cyclin-Dependent Protein Serine/Threonine Kinase Activity (GO:0000079)	1/79	0.0576588	0.0836459	0	0	18.2299	52.0136	LATS1
143	Negative Regulation Of Protein Serine/Threonine Kinase Activity (GO:0071901)	1/80	0.0583684	0.0840831	0	0	17.9982	51.1325	LATS1
347	Recruitment Of NuMA To Mitotic Centrosomes R-HSA-380320	1/80	0.0583684	0.0913095	0	0	17.9982	51.1325	DYNLL1
348	Centrosome Maturation R-HSA-380287	1/81	0.0590774	0.0913095	0	0	17.7723	50.2762	DYNLL1
144	Regulation Of Phosphorylation (GO:0042325)	1/82	0.059786	0.0852268	0	0	17.552	49.4438	DYNLL1
225	Plasma Membrane Raft (GO:0044853)	1/82	0.059786	0.132159	0	0	17.552	49.4438	DYNLL1
349	PI Metabolism R-HSA-1483255	1/82	0.059786	0.0913095	0	0	17.552	49.4438	PIK3C2A
145	Negative Regulation Of Cellular Process (GO:0048523)	2/537	0.0599897	0.0852268	0	0	5.5931	15.7366	DYNLL1;PTPN14
146	Vesicle-Mediated Transport To The Plasma Membrane (GO:0098876)	1/83	0.0604941	0.0853546	0	0	17.3371	48.6342	SNX3
147	Negative Regulation Of Cell Cycle (GO:0045786)	1/85	0.0619087	0.0865688	0	0	16.9226	47.0803	LATS1
269	Protein Tyrosine Kinase Binding (GO:1990782)	1/85	0.0619087	0.112025	0	0	16.9226	47.0803	PTPN14
148	Exocytosis (GO:0006887)	1/86	0.0626153	0.0865688	0	0	16.7227	46.3343	PIK3C2A
149	Negative Regulation Of Angiogenesis (GO:0016525)	1/86	0.0626153	0.0865688	0	0	16.7227	46.3343	AMOT
350	Regulation Of PLK1 Activity At G2/M Transition R-HSA-2565942	1/87	0.0633213	0.094982	0	0	16.5274	45.6079	DYNLL1
150	Positive Regulation Of Peptidyl-Serine Phosphorylation (GO:0033138)	1/89	0.064732	0.0888986	0	0	16.1502	44.2111	LATS1
151	Regulation Of Actin Cytoskeleton Organization (GO:0032956)	1/91	0.0661407	0.0902316	0	0	15.7897	42.8843	DYNLL1
152	Positive Regulation Of Neuron Projection Development (GO:0010976)	1/92	0.0668443	0.0905916	0	0	15.6154	42.2457	SNX3
153	Regulation Of Peptidyl-Serine Phosphorylation (GO:0033135)	1/93	0.0675474	0.0909461	0	0	15.4449	41.6228	LATS1
270	Phosphatidylinositol Bisphosphate Binding (GO:1902936)	1/93	0.0675474	0.116673	0	0	15.4449	41.6228	SNX3
154	Retrograde Transport, Endosome To Golgi (GO:0042147)	1/94	0.06825	0.0912954	0	0	15.278	41.0151	SNX3
291	Phosphatidylinositol signaling system	1/97	0.0703548	0.112568	0	0	14.7984	39.2779	PIK3C2A
351	Anchoring Of Basal Body To Plasma Membrane R-HSA-5620912	1/97	0.0703548	0.103681	0	0	14.7984	39.2779	DYNLL1
155	Phosphatidylinositol Biosynthetic Process (GO:0006661)	1/98	0.0710555	0.0941506	0	0	14.6451	38.7259	PIK3C2A
156	Cellular Response To Insulin Stimulus (GO:0032869)	1/99	0.0717556	0.0941506	0	0	14.4949	38.1867	PIK3C2A
157	Axon Development (GO:0061564)	1/99	0.0717556	0.0941506	0	0	14.4949	38.1867	CAMSAP2
158	Protein Complex Oligomerization (GO:0051259)	1/100	0.0724552	0.0944669	0	0	14.3478	37.6598	WDCP
226	Phagocytic Vesicle (GO:0045335)	1/100	0.0724552	0.145397	0	0	14.3478	37.6598	SNX3
227	Cytoskeleton (GO:0005856)	2/599	0.0726987	0.145397	0	0	4.99626	13.0974	DYNLL1;DYNLL2
159	Activation Of GTPase Activity (GO:0090630)	1/102	0.073853	0.0956838	0	0	14.0622	36.6417	SIPA1L3
160	Positive Regulation Of Autophagy (GO:0010508)	1/107	0.077339	0.0988293	0	0	13.3956	34.2867	PIK3C2A
161	Glycerophospholipid Biosynthetic Process (GO:0046474)	1/108	0.0780347	0.0988293	0	0	13.2697	33.8457	PIK3C2A
162	Cell-Matrix Adhesion (GO:0007160)	1/109	0.0787299	0.0988293	0	0	13.1462	33.414	DYNLL1
163	Regulation Of Wnt Signaling Pathway (GO:0030111)	1/109	0.0787299	0.0988293	0	0	13.1462	33.414	SNX3
164	Positive Regulation Of Cysteine-Type Endopeptidase Activity Involved In Apoptotic Process (GO:0043280)	1/109	0.0787299	0.0988293	0	0	13.1462	33.414	DYNLL1
271	Phosphatidylinositol Phosphate Binding (GO:1901981)	1/109	0.0787299	0.121148	0	0	13.1462	33.414	SNX3
165	Regulation Of Transforming Growth Factor Beta Receptor Signaling Pathway (GO:0017015)	1/111	0.0801189	0.0988293	0	0	12.9058	32.5775	LATS1
166	Mitotic Cell Cycle Phase Transition (GO:0044772)	1/111	0.0801189	0.0988293	0	0	12.9058	32.5775	LATS1
167	Cytoskeleton Organization (GO:0007010)	1/111	0.0801189	0.0988293	0	0	12.9058	32.5775	SIPA1L3
352	Post-translational Protein Modification R-HSA-597592	3/1383	0.0804253	0.116478	0	0	3.37047	8.49502	SNX3;DYNLL1;DYNLL2
272	Phosphatase Binding (GO:0019902)	1/112	0.0808127	0.121148	0	0	12.7889	32.1721	SNX3
168	Negative Regulation Of Canonical Wnt Signaling Pathway (GO:0090090)	1/114	0.0821987	0.100791	0	0	12.5613	31.3859	LATS1
273	Protein Phosphatase Binding (GO:0019903)	1/115	0.082891	0.121148	0	0	12.4505	31.0046	SNX3
274	Nuclear Receptor Binding (GO:0016922)	1/115	0.082891	0.121148	0	0	12.4505	31.0046	LATS1
228	Early Endosome Membrane (GO:0031901)	1/116	0.0835828	0.159567	0	0	12.3416	30.6309	SNX3
353	Cell Cycle R-HSA-1640170	2/654	0.0846579	0.12053	0	0	4.56182	11.2638	DYNLL1;DYNLL2
169	Positive Regulation Of Cell Projection Organization (GO:0031346)	1/118	0.084965	0.103567	0	0	12.1294	29.9053	SNX3
170	Regulation Of Protein-Containing Complex Assembly (GO:0043254)	1/119	0.0856553	0.103794	0	0	12.026	29.553	LATS1
171	Regulation Of Protein Catabolic Process (GO:0042176)	1/122	0.0877235	0.105679	0	0	11.7261	28.5362	SNX3
172	Epithelial Cell Differentiation (GO:0030855)	1/132	0.0945857	0.113283	0	0	10.8255	25.5293	LATS1
173	Negative Regulation Of Cell Motility (GO:2000146)	1/133	0.0952693	0.113442	0	0	10.743	25.2572	DYNLL1
174	Negative Regulation Of Wnt Signaling Pathway (GO:0030178)	1/140	0.100041	0.118439	0	0	10.1984	23.4784	LATS1
354	Cellular Responses To Stress R-HSA-2262752	2/722	0.100237	0.138059	0	0	4.11645	9.46872	DYNLL1;DYNLL2
355	Clathrin-mediated Endocytosis R-HSA-8856828	1/142	0.1014	0.138059	0	0	10.0527	23.0074	PIK3C2A
229	Mitotic Spindle (GO:0072686)	1/143	0.102079	0.186404	0	0	9.98139	22.7777	DYNLL1
356	Adaptive Immune System R-HSA-1280218	2/733	0.102833	0.138059	0	0	4.05219	9.21731	DYNLL1;DYNLL2
357	Cellular Responses To Stimuli R-HSA-8953897	2/736	0.103545	0.138059	0	0	4.035	9.15039	DYNLL1;DYNLL2
175	Positive Regulation Of Cellular Catabolic Process (GO:0031331)	1/146	0.104112	0.122555	0	0	9.7734	22.1102	PIK3C2A
176	Negative Regulation Of Protein Metabolic Process (GO:0051248)	1/147	0.104789	0.122651	0	0	9.70597	21.8948	SNX3
358	CDC42 GTPase Cycle R-HSA-9013148	1/149	0.106141	0.13931	0	0	9.57384	21.474	PLEKHG1
230	Adherens Junction (GO:0005912)	1/150	0.106817	0.186929	0	0	9.50911	21.2685	CAMSAP3
359	Interleukin-1 Family Signaling R-HSA-446652	1/152	0.108166	0.139784	0	0	9.38221	20.8669	PTPN14
275	Magnesium Ion Binding (GO:0000287)	1/155	0.110187	0.155077	0	0	9.19805	20.287	LATS1
177	Regulation Of Cell Population Proliferation (GO:0042127)	2/766	0.110737	0.128881	0	0	3.87052	8.51744	DYNLL1;PTPN14
178	Peptidyl-Serine Phosphorylation (GO:0018105)	1/158	0.112203	0.129853	0	0	9.02093	19.7328	LATS1
231	Tertiary Granule (GO:0070820)	1/162	0.114885	0.193006	0	0	8.79503	19.0309	DYNLL1
179	Negative Regulation Of Cell Migration (GO:0030336)	1/163	0.115554	0.132984	0	0	8.7403	18.8617	DYNLL1
180	Peptidyl-Serine Modification (GO:0018209)	1/166	0.117559	0.13454	0	0	8.58009	18.3684	LATS1
232	Membrane Raft (GO:0045121)	1/169	0.119559	0.193135	0	0	8.4256	17.8955	DYNLL1
292	Tight junction	1/169	0.119559	0.159413	0	0	8.4256	17.8955	AMOT
181	Heart Development (GO:0007507)	1/171	0.120891	0.137589	0	0	8.32563	17.5909	DYNLL1
360	RAC1 GTPase Cycle R-HSA-9013149	1/178	0.125536	0.159773	0	0	7.99354	16.5879	PLEKHG1
182	Endosomal Transport (GO:0016197)	1/180	0.126859	0.143588	0	0	7.90343	16.318	SNX3
361	G2/M Transition R-HSA-69275	1/182	0.12818	0.15997	0	0	7.81531	16.0551	DYNLL1
233	Ficolin-1-Rich Granule (GO:0101002)	1/184	0.1295	0.201444	0	0	7.72912	15.7989	DYNLL1
362	Mitotic G2-G2/M Phases R-HSA-453274	1/184	0.1295	0.15997	0	0	7.72912	15.7989	DYNLL1
183	Endocytosis (GO:0006897)	1/189	0.13279	0.149479	0	0	7.52166	15.1861	PIK3C2A
184	Neuron Projection Development (GO:0031175)	1/192	0.134758	0.150785	0	0	7.40239	14.8364	CAMSAP2
185	Regulation Of Signal Transduction (GO:0009966)	1/193	0.135413	0.150785	0	0	7.36347	14.7227	SNX3
363	Disease R-HSA-1643685	3/1736	0.135594	0.165071	0	0	2.63301	5.26098	WDCP;DYNLL1;DYNLL2
234	Endocytic Vesicle (GO:0030139)	1/196	0.137376	0.206064	0	0	7.24908	14.3897	AMOT
186	Golgi Vesicle Transport (GO:0048193)	1/197	0.13803	0.152871	0	0	7.21173	14.2813	SNX3
276	Small GTPase Binding (GO:0031267)	1/199	0.139335	0.18599	0	0	7.13817	14.0684	PLEKHG1
364	Ub-specific Processing Proteases R-HSA-5689880	1/201	0.140638	0.168766	0	0	7.06607	13.8605	SNX3
277	Guanyl-Nucleotide Exchange Factor Activity (GO:0005085)	1/203	0.14194	0.18599	0	0	6.9954	13.6575	PLEKHG1
187	Regulation Of Angiogenesis (GO:0045765)	1/205	0.14324	0.157794	0	0	6.92612	13.4591	AMOT
188	Regulation Of Canonical Wnt Signaling Pathway (GO:0060828)	1/207	0.144538	0.158377	0	0	6.85818	13.2652	LATS1
365	Phospholipid Metabolism R-HSA-1483257	1/208	0.145186	0.17177	0	0	6.82471	13.1699	PIK3C2A
235	Spindle (GO:0005819)	1/210	0.146481	0.212146	0	0	6.75871	12.9825	DYNLL1
293	Rap1 signaling pathway	1/210	0.146481	0.167407	0	0	6.75871	12.9825	SIPA1L3
189	Positive Regulation Of Protein Modification Process (GO:0031401)	1/225	0.156137	0.170182	0	0	6.30134	11.7017	DYNLL1
278	GTPase Binding (GO:0051020)	1/225	0.156137	0.197774	0	0	6.30134	11.7017	PLEKHG1
190	Cilium Organization (GO:0044782)	1/228	0.158056	0.170469	0	0	6.21712	11.4694	IFT74
191	Apoptotic Process (GO:0006915)	1/228	0.158056	0.170469	0	0	6.21712	11.4694	DYNLL1
366	Infectious Disease R-HSA-5663205	2/961	0.160465	0.187209	0	0	3.05222	5.58458	DYNLL1;DYNLL2
192	Positive Regulation Of GTPase Activity (GO:0043547)	1/234	0.161882	0.173686	0	0	6.05518	11.0258	SIPA1L3
236	Vesicle (GO:0031982)	1/235	0.162518	0.225343	0	0	6.029	10.9545	PIK3C2A
367	Metabolism Of Proteins R-HSA-392499	3/1890	0.163201	0.187793	0	0	2.39772	4.34652	SNX3;DYNLL1;DYNLL2
193	Regulation Of Autophagy (GO:0010506)	1/241	0.166325	0.177528	0	0	5.87649	10.5413	PIK3C2A
237	trans-Golgi Network (GO:0005802)	1/241	0.166325	0.225343	0	0	5.87649	10.5413	PIK3C2A
194	Positive Regulation Of Programmed Cell Death (GO:0043068)	1/245	0.168854	0.179298	0	0	5.77898	10.2792	LATS1
368	Immune System R-HSA-168256	3/1943	0.17312	0.196514	0	0	2.32539	4.0782	DYNLL1;DYNLL2;PTPN14
294	Endocytosis	1/252	0.173262	0.173262	0	0	5.61582	9.84426	SNX3
238	Polymeric Cytoskeletal Fiber (GO:0099513)	1/265	0.181391	0.238075	0	0	5.33577	9.1087	AMOT
195	Plasma Membrane Bounded Cell Projection Assembly (GO:0120031)	1/275	0.187593	0.198175	0	0	5.13843	8.59906	IFT74
239	Secretory Granule Membrane (GO:0030667)	1/279	0.190062	0.241897	0	0	5.06346	8.40741	DYNLL1
279	ATP Binding (GO:0005524)	1/279	0.190062	0.232979	0	0	5.06346	8.40741	LATS1
369	Deubiquitination R-HSA-5688426	1/279	0.190062	0.212869	0	0	5.06346	8.40741	SNX3
196	Transmembrane Receptor Protein Tyrosine Kinase Signaling Pathway (GO:0007169)	1/284	0.193137	0.202991	0	0	4.97274	8.17694	PIK3C2A
370	Signaling By WNT R-HSA-195721	1/294	0.199256	0.220231	0	0	4.80059	7.74412	SNX3
240	Early Endosome (GO:0005769)	1/307	0.207146	0.255887	0	0	4.5936	7.23184	SNX3
280	Adenyl Ribonucleotide Binding (GO:0032559)	1/309	0.208354	0.24742	0	0	4.56331	7.15763	LATS1
197	Supramolecular Fiber Organization (GO:0097435)	1/316	0.212566	0.222277	0	0	4.46032	6.90681	CAMSAP2
198	Organelle Assembly (GO:0070925)	1/322	0.21616	0.224894	0	0	4.37561	6.70228	IFT74
281	Tubulin Binding (GO:0015631)	1/322	0.21616	0.248912	0	0	4.37561	6.70228	IFT74
199	Intracellular Protein Transport (GO:0006886)	1/325	0.217951	0.225618	0	0	4.33444	6.60344	CAMSAP3
241	Intracellular Non-Membrane-Bounded Organelle (GO:0043232)	2/1195	0.224805	0.269766	0	0	2.42337	3.61693	DYNLL1;DYNLL2
282	Protein Serine/Threonine Kinase Activity (GO:0004674)	1/342	0.22803	0.254857	0	0	4.11479	6.08281	LATS1
242	Endosome Membrane (GO:0010008)	1/361	0.23915	0.278576	0	0	3.89385	5.57079	SNX3
200	Positive Regulation Of Protein Phosphorylation (GO:0001934)	1/377	0.248399	0.255851	0	0	3.72511	5.18804	LATS1
243	Focal Adhesion (GO:0005925)	1/387	0.254126	0.278576	0	0	3.62676	4.96839	DYNLL1
244	Cytoplasmic Vesicle Membrane (GO:0030659)	1/389	0.255266	0.278576	0	0	3.6077	4.92612	SNX3
245	Cell-Substrate Junction (GO:0030055)	1/395	0.258678	0.278576	0	0	3.55167	4.80247	DYNLL1
201	Vesicle-Mediated Transport (GO:0016192)	1/411	0.267704	0.274364	0	0	3.41028	4.49431	PIK3C2A
202	Organelle Organization (GO:0006996)	1/418	0.271621	0.277	0	0	3.35183	4.3686	SIPA1L3
371	Diseases Of Signal Transduction By Growth Factor Receptors And Second Messengers R-HSA-5663202	1/424	0.274963	0.299959	0	0	3.30328	4.26492	WDCP
203	Phosphorylation (GO:0016310)	1/429	0.277737	0.281841	0	0	3.26385	4.18126	LATS1
372	RHO GTPase Cycle R-HSA-9012999	1/441	0.284353	0.306227	0	0	3.17289	3.99003	PLEKHG1
373	Signaling By Interleukins R-HSA-449147	1/453	0.290914	0.309326	0	0	3.08676	3.81131	PTPN14
374	Neutrophil Degranulation R-HSA-6798695	1/468	0.299035	0.313987	0	0	2.98532	3.60386	DYNLL1
283	Purine Ribonucleoside Triphosphate Binding (GO:0035639)	1/476	0.303331	0.32933	0	0	2.93383	3.49987	LATS1
204	Protein Phosphorylation (GO:0006468)	1/500	0.316071	0.31917	0	0	2.78929	3.21268	LATS1
284	Protein Kinase Binding (GO:0019901)	1/511	0.321837	0.335879	0	0	2.72759	3.0923	LATS1
285	Metal Ion Binding (GO:0046872)	1/521	0.32704	0.335879	0	0	2.67376	2.98839	LATS1
246	Intracellular Membrane-Bounded Organelle (GO:0043231)	5/5175	0.342691	0.359826	0	0	1.43279	1.53441	LATS1;DYNLL1;PIK3C2A;DYNLL2;PTPN14
375	Cytokine Signaling In Immune System R-HSA-1280215	1/702	0.415005	0.430376	0	0	1.96495	1.7281	PTPN14
205	Regulation Of Apoptotic Process (GO:0042981)	1/705	0.416368	0.418399	0	0	1.95627	1.71406	LATS1
206	Protein Modification Process (GO:0036211)	1/711	0.419086	0.419086	0	0	1.93913	1.68643	LATS1
376	Metabolism Of Lipids R-HSA-556833	1/732	0.428504	0.438955	0	0	1.88138	1.59438	PIK3C2A
247	Nucleus (GO:0005634)	4/4487	0.44381	0.454634	0	0	1.25744	1.02149	LATS1;DYNLL1;DYNLL2;PTPN14
248	Bounding Membrane Of Organelle (GO:0098588)	1/819	0.466024	0.466024	0	0	1.67368	1.27789	SNX3
286	DNA Binding (GO:0003677)	1/846	0.477192	0.477192	0	0	1.61792	1.197	CAMSAP3
377	Innate Immune System R-HSA-168249	1/1035	0.549475	0.556095	0	0	1.30913	0.783898	DYNLL1
378	Metabolism R-HSA-1430728	1/2049	0.802475	0.802475	0	0	0.625593	0.137664	PIK3C2A

## Sheet: Cluster8
	Term	Overlap	P.value	Adjusted.P.value	Old.P.value	Old.Adjusted.P.value	Odds.Ratio	Combined.Score	Genes
89	Cadherin Binding (GO:0045296)	3/319	0.00031442	0.00597397	0	0	31.1313	251.067	TRIM25;EPS15L1;ZC3HAV1
113	Membrane Trafficking R-HSA-199991	3/599	0.00196183	0.0690627	0	0	16.271	101.431	ARF3;UBAP1;EPS15L1
114	Vesicle-mediated Transport R-HSA-5653656	3/637	0.0023397	0.0690627	0	0	15.2658	92.476	ARF3;UBAP1;EPS15L1
1	RIG-I Signaling Pathway (GO:0039529)	1/6	0.00269726	0.0393976	0	0	499.65	2955.69	TRIM25
2	Response To Auditory Stimulus (GO:0010996)	1/7	0.00314617	0.0393976	0	0	416.354	2398.85	USP53
3	Protein poly-ADP-ribosylation (GO:0070212)	1/8	0.00359491	0.0393976	0	0	356.857	2008.48	ZC3HAV1
69	Junctional Sarcoplasmic Reticulum Membrane (GO:0014701)	1/8	0.00359491	0.0478557	0	0	356.857	2008.48	JPH1
4	Calcium Ion Transport Into Cytosol (GO:0060402)	1/9	0.00404347	0.0393976	0	0	312.234	1720.62	JPH1
5	Positive Regulation Of Protein Acetylation (GO:1901985)	1/9	0.00404347	0.0393976	0	0	312.234	1720.62	DIP2B
6	Regulation Of Peptidyl-Lysine Acetylation (GO:2000756)	1/10	0.00449184	0.0393976	0	0	277.528	1500.17	DIP2B
108	Endocytosis	2/252	0.00536992	0.0268496	0	0	22.5611	117.926	ARF3;EPS15L1
7	Positive Regulation Of mRNA Metabolic Process (GO:1903313)	1/12	0.00538806	0.0393976	0	0	227.045	1185.99	ZC3HAV1
70	Clathrin Coat Of Coated Pit (GO:0030132)	1/12	0.00538806	0.0478557	0	0	227.045	1185.99	EPS15L1
90	NAD+ Binding (GO:0070403)	1/12	0.00538806	0.0511866	0	0	227.045	1185.99	ZC3HAV1
115	NF-kB Activation Thru FADD/RIP-1 Pathway Mediated By Caspase-8 And -10 R-HSA-933543	1/13	0.0058359	0.0690627	0	0	208.115	1070.48	TRIM25
8	Protein Transport To Vacuole Involved In Ubiquitin-Dependent Protein Catabolic Process Via The Multivesicular Body Sorting Pathway (GO:0043328)	1/14	0.00628356	0.0393976	0	0	192.096	973.893	UBAP1
116	Membrane Binding And Targetting Of GAG Proteins R-HSA-174490	1/15	0.00673105	0.0690627	0	0	178.366	892.013	UBAP1
117	TRAF3-dependent IRF Activation Pathway R-HSA-918233	1/15	0.00673105	0.0690627	0	0	178.366	892.013	TRIM25
71	Clathrin Coat (GO:0030118)	1/16	0.00717835	0.0478557	0	0	166.467	821.794	EPS15L1
9	Positive Regulation Of Peptidyl-Lysine Acetylation (GO:2000758)	1/17	0.00762547	0.0393976	0	0	156.055	760.963	DIP2B
118	Synthesis Of PIPs At Golgi Membrane R-HSA-1660514	1/17	0.00762547	0.0690627	0	0	156.055	760.963	ARF3
119	Assembly Of HIV Virion R-HSA-175474	1/18	0.00807242	0.0690627	0	0	146.868	707.8	UBAP1
10	Intracellular Protein Transport (GO:0006886)	2/325	0.00878835	0.0393976	0	0	17.3976	82.366	ARF3;UBAP1
11	Modulation By Symbiont Of Entry Into Host (GO:0052372)	1/21	0.00941218	0.0393976	0	0	124.819	582.373	TRIM25
12	Negative Regulation Of Axonogenesis (GO:0050771)	1/22	0.00985841	0.0393976	0	0	118.869	549.107	DIP2B
13	Cytosolic Pattern Recognition Receptor Signaling Pathway (GO:0002753)	1/23	0.0103045	0.0393976	0	0	113.46	519.101	TRIM25
14	Regulation Of Viral Life Cycle (GO:1903900)	1/24	0.0107503	0.0393976	0	0	108.522	491.909	TRIM25
15	Regulation Of Ryanodine-Sensitive Calcium-Release Channel Activity (GO:0060314)	1/24	0.0107503	0.0393976	0	0	108.522	491.909	JPH1
16	Ubiquitin-Dependent Protein Catabolic Process (GO:0006511)	2/367	0.0111009	0.0393976	0	0	15.3628	69.1439	TRIM25;UBAP1
17	Late Endosome To Vacuole Transport Via Multivesicular Body Sorting Pathway (GO:0032511)	1/25	0.011196	0.0393976	0	0	103.995	467.165	UBAP1
120	TRAF6 Mediated NF-kB Activation R-HSA-933542	1/25	0.011196	0.0690627	0	0	103.995	467.165	TRIM25
91	NAD Binding (GO:0051287)	1/26	0.0116415	0.055154	0	0	99.83	444.56	ZC3HAV1
92	NAD+ ADP-ribosyltransferase Activity (GO:0003950)	1/26	0.0116415	0.055154	0	0	99.83	444.56	ZC3HAV1
18	Establishment Of Protein Localization To Vacuole (GO:0072666)	1/27	0.0120869	0.0393976	0	0	95.9856	423.837	UBAP1
72	Sarcoplasmic Reticulum Membrane (GO:0033017)	1/27	0.0120869	0.0604344	0	0	95.9856	423.837	JPH1
121	TRAF6 Mediated IRF7 Activation R-HSA-933541	1/28	0.012532	0.0690627	0	0	92.4259	404.776	TRIM25
19	Multivesicular Body Assembly (GO:0036258)	1/29	0.012977	0.0393976	0	0	89.1205	387.191	UBAP1
122	Budding And Maturation Of HIV Virion R-HSA-162588	1/29	0.012977	0.0690627	0	0	89.1205	387.191	UBAP1
20	Multivesicular Body Organization (GO:0036257)	1/30	0.0134218	0.0393976	0	0	86.0431	370.921	UBAP1
21	Negative Regulation Of Axon Extension (GO:0030517)	1/30	0.0134218	0.0393976	0	0	86.0431	370.921	DIP2B
123	Endosomal Sorting Complex Required For Transport (ESCRT) R-HSA-917729	1/30	0.0134218	0.0690627	0	0	86.0431	370.921	UBAP1
22	Vesicle-Mediated Transport (GO:0016192)	2/411	0.0137837	0.0393976	0	0	13.6794	58.6061	ARF3;EPS15L1
23	Negative Regulation Of Developmental Growth (GO:0048640)	1/31	0.0138665	0.0393976	0	0	83.1708	355.828	DIP2B
124	Late Endosomal Microautophagy R-HSA-9615710	1/31	0.0138665	0.0690627	0	0	83.1708	355.828	UBAP1
125	EGFR Downregulation R-HSA-182971	1/31	0.0138665	0.0690627	0	0	83.1708	355.828	EPS15L1
24	Regulation Of Calcium Ion Transmembrane Transporter Activity (GO:1901019)	1/32	0.0143109	0.0393976	0	0	80.4839	341.794	JPH1
126	Termination Of Translesion DNA Synthesis R-HSA-5656169	1/32	0.0143109	0.0690627	0	0	80.4839	341.794	TRIM25
25	Ubiquitin-Dependent Protein Catabolic Process Via The Multivesicular Body Sorting Pathway (GO:0043162)	1/33	0.0147552	0.0393976	0	0	77.9648	328.712	UBAP1
26	Response To Estrogen (GO:0043627)	1/34	0.0151993	0.0393976	0	0	75.5985	316.494	TRIM25
27	Regulation Of Axon Extension (GO:0030516)	1/35	0.0156432	0.0393976	0	0	73.3713	305.057	DIP2B
127	Negative Regulators Of DDX58/IFIH1 Signaling R-HSA-936440	1/35	0.0156432	0.0690627	0	0	73.3713	305.057	TRIM25
28	Membrane Fission (GO:0090148)	1/38	0.0169738	0.0412222	0	0	67.4122	274.777	UBAP1
93	Alpha-Tubulin Binding (GO:0043014)	1/38	0.0169738	0.055154	0	0	67.4122	274.777	DIP2B
94	Pentosyltransferase Activity (GO:0016763)	1/39	0.017417	0.055154	0	0	65.6349	265.841	ZC3HAV1
128	Ovarian Tumor Domain Proteases R-HSA-5689896	1/39	0.017417	0.0690627	0	0	65.6349	265.841	TRIM25
129	Translesion Synthesis By Y Family DNA Polymerases Bypasses Lesions On DNA Template R-HSA-110313	1/39	0.017417	0.0690627	0	0	65.6349	265.841	TRIM25
130	RND1 GTPase Cycle R-HSA-9696273	1/42	0.0187456	0.0690627	0	0	60.8232	241.881	RASAL2
131	RND3 GTPase Cycle R-HSA-9696264	1/42	0.0187456	0.0690627	0	0	60.8232	241.881	RASAL2
29	Regulation Of Viral Entry Into Host Cell (GO:0046596)	1/44	0.0196304	0.041573	0	0	57.9884	227.934	TRIM25
30	Positive Regulation Of mRNA Catabolic Process (GO:0061014)	1/45	0.0200725	0.041573	0	0	56.6676	221.48	ZC3HAV1
73	Sarcoplasmic Reticulum (GO:0016529)	1/45	0.0200725	0.0802901	0	0	56.6676	221.48	JPH1
31	Antiviral Innate Immune Response (GO:0140374)	1/46	0.0205145	0.041573	0	0	55.4056	215.341	TRIM25
32	Regulation Of mRNA Catabolic Process (GO:0061013)	1/46	0.0205145	0.041573	0	0	55.4056	215.341	ZC3HAV1
33	Protein Monoubiquitination (GO:0006513)	1/47	0.0209563	0.041573	0	0	54.1984	209.494	TRIM25
34	Retrograde Vesicle-Mediated Transport, Golgi To Endoplasmic Reticulum (GO:0006890)	1/48	0.0213979	0.041573	0	0	53.0426	203.92	ARF3
35	Post-Translational Protein Modification (GO:0043687)	1/48	0.0213979	0.041573	0	0	53.0426	203.92	ZC3HAV1
132	DNA Damage Bypass R-HSA-73893	1/48	0.0213979	0.0727977	0	0	53.0426	203.92	TRIM25
133	Signaling By EGFR R-HSA-177929	1/49	0.0218393	0.0727977	0	0	51.9349	198.601	EPS15L1
36	Regulation Of Release Of Sequestered Calcium Ion Into Cytosol (GO:0051279)	1/51	0.0227216	0.0429186	0	0	49.8525	188.664	JPH1
37	Negative Regulation Of Viral Genome Replication (GO:0045071)	1/53	0.0236033	0.043379	0	0	47.9303	179.565	ZC3HAV1
38	Pattern Recognition Receptor Signaling Pathway (GO:0002221)	1/56	0.0249244	0.0434579	0	0	45.3091	167.277	TRIM25
39	Regulation Of Cation Channel Activity (GO:2001257)	1/56	0.0249244	0.0434579	0	0	45.3091	167.277	JPH1
40	Negative Regulation Of Viral Process (GO:0048525)	1/61	0.0271227	0.0461085	0	0	41.5229	149.789	ZC3HAV1
134	Signaling By BRAF And RAF1 Fusions R-HSA-6802952	1/62	0.0275618	0.0831544	0	0	40.8402	146.67	ZC3HAV1
135	Regulation Of RAS By GAPs R-HSA-5658442	1/65	0.0288781	0.0831544	0	0	38.9199	137.958	RASAL2
41	Regulation Of Viral Genome Replication (GO:0045069)	1/67	0.0297548	0.0493495	0	0	37.7367	132.636	ZC3HAV1
42	Protein K48-linked Ubiquitination (GO:0070936)	1/70	0.0310685	0.0500428	0	0	36.0906	125.291	TRIM25
109	RIG-I-like receptor signaling pathway	1/70	0.0310685	0.0764117	0	0	36.0906	125.291	TRIM25
43	Regulation Of Cellular Localization (GO:0060341)	1/72	0.0319434	0.0500428	0	0	35.0704	120.775	TRIM25
44	Ubiquitin-Dependent ERAD Pathway (GO:0030433)	1/73	0.0323806	0.0500428	0	0	34.5816	118.622	TRIM25
136	ISG15 Antiviral Mechanism R-HSA-1169408	1/75	0.0332545	0.0831544	0	0	33.6436	114.508	TRIM25
74	Cytoplasmic Stress Granule (GO:0010494)	1/76	0.0336912	0.0996033	0	0	33.1933	112.543	TRIM25
137	Oncogenic MAPK Signaling R-HSA-6802957	1/78	0.034564	0.0831544	0	0	32.3279	108.782	ZC3HAV1
138	COPI-dependent Golgi-to-ER Retrograde Traffic R-HSA-6811434	1/78	0.034564	0.0831544	0	0	32.3279	108.782	ARF3
95	Ubiquitin Binding (GO:0043130)	1/80	0.0354361	0.0961837	0	0	31.5063	105.232	UBAP1
139	COPI-mediated Anterograde Transport R-HSA-6807878	1/80	0.0354361	0.0831544	0	0	31.5063	105.232	ARF3
75	Bicellular Tight Junction (GO:0005923)	1/81	0.0358719	0.0996033	0	0	31.1109	103.531	USP53
140	DDX58/IFIH1-mediated Induction Of Interferon-Alpha/Beta R-HSA-168928	1/81	0.0358719	0.0831544	0	0	31.1109	103.531	TRIM25
141	PI Metabolism R-HSA-1483255	1/82	0.0363075	0.0831544	0	0	30.7253	101.877	ARF3
45	Calcium Ion Transmembrane Import Into Cytosol (GO:0097553)	1/83	0.036743	0.0555227	0	0	30.3491	100.268	JPH1
142	Antiviral Mechanism By IFN-stimulated Genes R-HSA-1169410	1/83	0.036743	0.0831544	0	0	30.3491	100.268	TRIM25
143	Disease R-HSA-1643685	3/1736	0.0368255	0.0831544	0	0	5.26774	17.3918	TRIM25;UBAP1;ZC3HAV1
46	Sensory Perception Of Mechanical Stimulus (GO:0050954)	1/89	0.039352	0.0569348	0	0	28.2713	91.4636	USP53
47	ERAD Pathway (GO:0036503)	1/89	0.039352	0.0569348	0	0	28.2713	91.4636	TRIM25
144	Interferon Gamma Signaling R-HSA-877300	1/89	0.039352	0.0853157	0	0	28.2713	91.4636	TRIM25
145	HCMV Late Events R-HSA-9610379	1/91	0.0402203	0.0853157	0	0	27.6403	88.8188	UBAP1
48	Sensory Perception Of Sound (GO:0007605)	1/92	0.0406541	0.0575933	0	0	27.3352	87.5451	USP53
76	Tight Junction (GO:0070160)	1/93	0.0410878	0.0996033	0	0	27.0367	86.3023	USP53
49	Regulation Of Protein Localization (GO:0032880)	1/97	0.0428209	0.0594249	0	0	25.9049	81.6195	TRIM25
96	Cysteine-Type Deubiquitinase Activity (GO:0004843)	1/98	0.0432537	0.102728	0	0	25.6366	80.5162	USP53
110	NF-kappa B signaling pathway	1/104	0.045847	0.0764117	0	0	24.1359	74.3976	TRIM25
146	Cargo Recognition For Clathrin-Mediated Endocytosis R-HSA-8856825	1/104	0.045847	0.0943909	0	0	24.1359	74.3976	EPS15L1
77	Apical Junction Complex (GO:0043296)	1/106	0.0467101	0.0996033	0	0	23.6738	72.5317	USP53
147	Golgi-to-ER Retrograde Transport R-HSA-8856688	1/112	0.0492951	0.0985901	0	0	22.3874	67.3845	ARF3
97	Deubiquitinase Activity (GO:0101005)	1/113	0.0497253	0.104976	0	0	22.1864	66.5867	USP53
78	Bounding Membrane Of Organelle (GO:0098588)	2/819	0.0498016	0.0996033	0	0	6.70537	20.1141	ARF3;UBAP1
148	HCMV Infection R-HSA-9609646	1/121	0.0531609	0.100575	0	0	20.699	60.7397	UBAP1
149	SARS-CoV-2 Activates/Modulates Innate And Adaptive Immune Responses R-HSA-9705671	1/121	0.0531609	0.100575	0	0	20.699	60.7397	TRIM25
50	Negative Regulation Of Cell Growth (GO:0030308)	1/125	0.0548745	0.0746293	0	0	20.0272	58.1331	DIP2B
150	Autophagy R-HSA-9612973	1/128	0.0561579	0.103449	0	0	19.5512	56.2993	UBAP1
151	ER To Golgi Anterograde Transport R-HSA-199977	1/133	0.0582935	0.104252	0	0	18.8059	53.4512	ARF3
152	Late Phase Of HIV Life Cycle R-HSA-162599	1/136	0.0595728	0.104252	0	0	18.3852	51.8564	UBAP1
153	Clathrin-mediated Endocytosis R-HSA-8856828	1/142	0.0621268	0.10607	0	0	17.5975	48.8961	EPS15L1
98	Cysteine-Type Peptidase Activity (GO:0008234)	1/144	0.0629767	0.119656	0	0	17.3497	47.9716	USP53
51	Positive Regulation Of Cellular Catabolic Process (GO:0031331)	1/146	0.063826	0.0851014	0	0	17.1086	47.076	ZC3HAV1
154	HIV Life Cycle R-HSA-162587	1/149	0.0650986	0.107983	0	0	16.7593	45.7839	UBAP1
155	Infectious Disease R-HSA-5663205	2/961	0.0663322	0.107983	0	0	5.67019	15.3837	TRIM25;UBAP1
52	Positive Regulation Of NF-kappaB Transcription Factor Activity (GO:0051092)	1/152	0.0663697	0.0867911	0	0	16.4238	44.5499	TRIM25
156	Transport To Golgi And Subsequent Modification R-HSA-948021	1/164	0.0714387	0.113652	0	0	15.2055	40.1261	ARF3
53	Membrane Organization (GO:0061024)	1/167	0.0727021	0.0932781	0	0	14.9285	39.1333	UBAP1
111	Influenza A	1/172	0.0748044	0.0935054	0	0	14.4883	37.5664	TRIM25
54	Positive Regulation Of I-kappaB kinase/NF-kappaB Signaling (GO:0043123)	1/175	0.0760637	0.0957839	0	0	14.2364	36.6755	TRIM25
55	Endosomal Transport (GO:0016197)	1/180	0.0781592	0.0966332	0	0	13.8352	35.266	EPS15L1
157	Intra-Golgi And Retrograde Golgi-to-ER Traffic R-HSA-6811442	1/181	0.0785778	0.122232	0	0	13.7576	34.9948	ARF3
56	Endocytosis (GO:0006897)	1/189	0.0819205	0.0975111	0	0	13.1669	32.9436	EPS15L1
57	Defense Response To Virus (GO:0051607)	1/189	0.0819205	0.0975111	0	0	13.1669	32.9436	TRIM25
58	Modification-Dependent Protein Catabolic Process (GO:0019941)	1/192	0.0831712	0.0975111	0	0	12.9581	32.2249	TRIM25
158	SARS-CoV-2-host Interactions R-HSA-9705683	1/196	0.0848365	0.128828	0	0	12.6897	31.306	TRIM25
59	Golgi Vesicle Transport (GO:0048193)	1/197	0.0852524	0.098257	0	0	12.6244	31.0829	ARF3
159	Interferon Signaling R-HSA-913531	1/200	0.0864991	0.128828	0	0	12.4322	30.4292	TRIM25
99	GTP Binding (GO:0005525)	1/201	0.0869143	0.150125	0	0	12.3694	30.2163	ARF3
79	Axon (GO:0030424)	1/205	0.0885735	0.161043	0	0	12.1244	29.3886	DIP2B
160	Phospholipid Metabolism R-HSA-1483257	1/208	0.0898162	0.130982	0	0	11.9469	28.7918	ARF3
60	Protein Polyubiquitination (GO:0000209)	1/226	0.0972406	0.110206	0	0	10.9811	25.5922	TRIM25
100	Guanyl Ribonucleotide Binding (GO:0032561)	1/226	0.0972406	0.150506	0	0	10.9811	25.5922	ARF3
161	HIV Infection R-HSA-162906	1/229	0.0984727	0.140675	0	0	10.835	25.1152	UBAP1
61	Regulation Of I-kappaB kinase/NF-kappaB Signaling (GO:0043122)	1/232	0.0997034	0.111145	0	0	10.6926	24.6525	TRIM25
112	Ras signaling pathway	1/232	0.0997034	0.0997034	0	0	10.6926	24.6525	RASAL2
101	Ubiquitin-Like Protein Transferase Activity (GO:0019787)	1/240	0.102978	0.150506	0	0	10.3305	23.4838	TRIM25
62	Positive Regulation Of DNA-binding Transcription Factor Activity (GO:0051091)	1/246	0.105427	0.115629	0	0	10.0745	22.665	TRIM25
80	Dendrite (GO:0030425)	1/270	0.115163	0.191938	0	0	9.1645	19.8082	DIP2B
162	RAF/MAP Kinase Cascade R-HSA-5673001	1/271	0.115567	0.156071	0	0	9.13009	19.7019	RASAL2
163	MAPK1/MAPK3 Signaling R-HSA-5684996	1/277	0.117985	0.156071	0	0	8.92889	19.0828	RASAL2
164	Deubiquitination R-HSA-5688426	1/279	0.11879	0.156071	0	0	8.86376	18.8834	TRIM25
165	Asparagine N-linked Glycosylation R-HSA-446203	1/282	0.119996	0.156071	0	0	8.76779	18.5903	ARF3
166	SARS-CoV-2 Infection R-HSA-9694516	1/283	0.120397	0.156071	0	0	8.73626	18.4943	TRIM25
167	Post-translational Protein Modification R-HSA-597592	2/1383	0.124448	0.158388	0	0	3.85021	8.02333	ARF3;TRIM25
81	Cell-Cell Junction (GO:0005911)	1/299	0.126802	0.19508	0	0	8.26049	17.059	USP53
102	RNA Binding (GO:0003723)	2/1411	0.12869	0.151928	0	0	3.76802	7.72577	TRIM25;ZC3HAV1
168	DNA Repair R-HSA-73894	1/310	0.131181	0.163976	0	0	7.96197	16.1722	TRIM25
103	Ubiquitin Protein Ligase Activity (GO:0061630)	1/311	0.131578	0.151928	0	0	7.93589	16.0952	TRIM25
63	Protein Transport (GO:0015031)	1/313	0.132372	0.14221	0	0	7.88421	15.943	ARF3
169	MAPK Family Signaling Cascades R-HSA-5683057	1/318	0.134353	0.164995	0	0	7.75789	15.5723	RASAL2
64	Proteasome-Mediated Ubiquitin-Dependent Protein Catabolic Process (GO:0043161)	1/319	0.134749	0.14221	0	0	7.7331	15.4998	TRIM25
104	Ubiquitin-Like Protein Ligase Activity (GO:0061659)	1/319	0.134749	0.151928	0	0	7.7331	15.4998	TRIM25
65	Organelle Assembly (GO:0070925)	1/322	0.135936	0.14221	0	0	7.65966	15.2854	UBAP1
105	Tubulin Binding (GO:0015631)	1/322	0.135936	0.151928	0	0	7.65966	15.2854	DIP2B
66	Protein Localization (GO:0008104)	1/351	0.147331	0.151796	0	0	7.01464	13.4335	ARF3
82	Endosome Membrane (GO:0010008)	1/361	0.15123	0.216042	0	0	6.81632	12.8757	UBAP1
170	SARS-CoV Infections R-HSA-9679506	1/369	0.154337	0.186269	0	0	6.66542	12.4551	TRIM25
83	Cytoplasmic Vesicle Membrane (GO:0030659)	1/389	0.162061	0.216081	0	0	6.3154	11.4927	UBAP1
106	Ubiquitin-Protein Transferase Activity (GO:0004842)	1/412	0.170866	0.180359	0	0	5.95499	10.5217	TRIM25
171	Diseases Of Signal Transduction By Growth Factor Receptors And Second Messengers R-HSA-5663202	1/424	0.175427	0.208134	0	0	5.78251	10.0646	ZC3HAV1
84	Golgi Membrane (GO:0000139)	1/427	0.176564	0.220705	0	0	5.7409	9.95513	ARF3
67	Protein Ubiquitination (GO:0016567)	1/434	0.179211	0.181886	0	0	5.64607	9.70667	TRIM25
172	RHO GTPase Cycle R-HSA-9012999	1/441	0.181851	0.212159	0	0	5.55426	9.46762	RASAL2
107	Purine Ribonucleoside Triphosphate Binding (GO:0035639)	1/476	0.194936	0.194936	0	0	5.13579	8.39745	ARF3
173	Signaling By Receptor Tyrosine Kinases R-HSA-9006934	1/496	0.202329	0.232181	0	0	4.92323	7.86663	EPS15L1
174	Metabolism Of Proteins R-HSA-392499	2/1890	0.206323	0.232945	0	0	2.73956	4.32388	ARF3;TRIM25
68	Positive Regulation Of Intracellular Signal Transduction (GO:1902533)	1/525	0.212943	0.212943	0	0	4.64385	7.18279	TRIM25
85	Neuron Projection (GO:0043005)	1/557	0.224508	0.264127	0	0	4.36938	6.52717	DIP2B
175	Signaling By Rho GTPases R-HSA-194315	1/644	0.255191	0.283546	0	0	3.76128	5.13693	RASAL2
176	Signaling By Rho GTPases, Miro GTPases And RHOBTB3 R-HSA-9716542	1/660	0.260715	0.285157	0	0	3.66692	4.92954	RASAL2
177	Cytokine Signaling In Immune System R-HSA-1280215	1/702	0.275042	0.2962	0	0	3.43973	4.44011	TRIM25
178	Metabolism Of Lipids R-HSA-556833	1/732	0.285125	0.302405	0	0	3.29343	4.1327	ARF3
179	Signal Transduction R-HSA-162582	2/2465	0.306596	0.320324	0	0	2.03329	2.40381	EPS15L1;RASAL2
86	Endoplasmic Reticulum Membrane (GO:0005789)	1/801	0.307842	0.342047	0	0	2.99859	3.53285	JPH1
180	Innate Immune System R-HSA-168249	1/1035	0.380183	0.391365	0	0	2.29171	2.21631	TRIM25
87	Intracellular Membrane-Bounded Organelle (GO:0043231)	3/5175	0.423841	0.446148	0	0	1.43262	1.22975	UBAP1;DIP2B;ZC3HAV1
181	Immune System R-HSA-168256	1/1943	0.601474	0.610191	0	0	1.16175	0.590604	TRIM25
182	Metabolism R-HSA-1430728	1/2049	0.622046	0.622046	0	0	1.09515	0.519915	ARF3
88	Nucleus (GO:0005634)	2/4487	0.633888	0.633888	0	0	0.987801	0.450321	DIP2B;ZC3HAV1

## Sheet: Cluster9
	Term	Overlap	P.value	Adjusted.P.value	Old.P.value	Old.Adjusted.P.value	Odds.Ratio	Combined.Score	Genes
1	Regulation Of Cell Fate Commitment (GO:0010453)	4/13	2.5408e-10	1.97319e-08	0	0	682.872	15086.9	RBBP4;RBBP7;MTA2;GATAD2B
2	Regulation Of Cell Fate Specification (GO:0042659)	4/14	3.55529e-10	1.97319e-08	0	0	614.554	13371.1	RBBP4;RBBP7;MTA2;GATAD2B
196	Regulation Of TP53 Activity Thru Acetylation R-HSA-6804758	4/29	8.37064e-09	1.02959e-06	0	0	245.637	4568.49	RBBP4;RBBP7;MTA2;GATAD2B
3	Histone Deacetylation (GO:0016575)	4/36	2.06849e-08	7.65341e-07	0	0	191.837	3394.33	RBBP4;RBBP7;MTA2;GATAD2B
4	Protein Deacetylation (GO:0006476)	4/40	3.20257e-08	8.88713e-07	0	0	170.487	2942.05	RBBP4;RBBP7;MTA2;GATAD2B
5	Regulation Of Stem Cell Differentiation (GO:2000736)	4/45	5.20768e-08	1.15611e-06	0	0	149.659	2509.86	RBBP4;RBBP7;MTA2;GATAD2B
197	ERCC6 (CSB) And EHMT2 (G9a) Positively Regulate rRNA Expression R-HSA-427389	4/45	5.20768e-08	2.33728e-06	0	0	149.659	2509.86	RBBP4;RBBP7;MTA2;GATAD2B
198	RNA Polymerase I Transcription Initiation R-HSA-73762	4/46	5.70069e-08	2.33728e-06	0	0	146.088	2436.76	RBBP4;RBBP7;MTA2;GATAD2B
199	HDACs Deacetylate Histones R-HSA-3214815	4/60	1.69115e-07	4.44987e-06	0	0	109.489	1707.23	RBBP4;RBBP7;MTA2;GATAD2B
200	Regulation Of PTEN Gene Transcription R-HSA-8943724	4/61	1.80889e-07	4.44987e-06	0	0	107.563	1669.95	RBBP4;RBBP7;MTA2;GATAD2B
201	Positive Epigenetic Regulation Of rRNA Expression R-HSA-5250913	4/74	3.96151e-07	7.93281e-06	0	0	87.5297	1290.32	RBBP4;RBBP7;MTA2;GATAD2B
202	RNA Polymerase I Promoter Clearance R-HSA-73854	4/78	4.90086e-07	7.93281e-06	0	0	82.7817	1202.71	RBBP4;RBBP7;MTA2;GATAD2B
203	RNA Polymerase I Transcription R-HSA-73864	4/79	5.15955e-07	7.93281e-06	0	0	81.6738	1182.41	RBBP4;RBBP7;MTA2;GATAD2B
6	Histone Modification (GO:0016570)	4/81	5.7073e-07	1.05585e-05	0	0	79.5445	1143.56	RBBP4;RBBP7;MTA2;GATAD2B
204	Potential Therapeutics For SARS R-HSA-9679191	4/97	1.17872e-06	1.61092e-05	0	0	65.8065	898.329	RBBP4;RBBP7;MTA2;GATAD2B
205	Epigenetic Regulation Of Gene Expression R-HSA-212165	4/116	2.4119e-06	2.96663e-05	0	0	54.5907	706.136	RBBP4;RBBP7;MTA2;GATAD2B
139	Nucleosomal DNA Binding (GO:0031492)	3/34	3.00277e-06	7.80719e-05	0	0	137.917	1753.75	RBBP4;MTA2;GATAD2B
206	Intracellular Signaling By Second Messengers R-HSA-9006925	5/306	4.31774e-06	4.82801e-05	0	0	27.2453	336.555	RBBP4;RBBP7;KPNA2;MTA2;GATAD2B
207	PTEN Regulation R-HSA-6807070	4/139	4.95641e-06	5.08032e-05	0	0	45.2376	552.57	RBBP4;RBBP7;MTA2;GATAD2B
208	Regulation Of TP53 Activity R-HSA-5633007	4/157	8.03183e-06	7.59935e-05	0	0	39.8793	467.868	RBBP4;RBBP7;MTA2;GATAD2B
112	NURF Complex (GO:0016589)	2/6	1.01795e-05	0.000192297	0	0	665.967	7655.38	RBBP4;RBBP7
209	SARS-CoV Infections R-HSA-9679506	5/369	1.07254e-05	9.42304e-05	0	0	22.4576	256.98	RBBP4;RBBP7;KPNA2;MTA2;GATAD2B
113	ESC/E(Z) Complex (GO:0035098)	2/7	1.42442e-05	0.000192297	0	0	532.747	5945.01	RBBP4;RBBP7
7	Regulation Of Cell Differentiation (GO:0045595)	4/193	1.81312e-05	0.000287509	0	0	32.2247	351.825	RBBP4;RBBP7;MTA2;GATAD2B
140	Nucleosome Binding (GO:0031491)	3/62	1.87013e-05	0.000243117	0	0	72.3632	787.812	RBBP4;MTA2;GATAD2B
8	Chromatin Remodeling (GO:0006338)	4/228	3.48414e-05	0.000483424	0	0	27.1415	278.599	RBBP4;RBBP7;MTA2;GATAD2B
210	Chromatin Modifying Enzymes R-HSA-3247509	4/238	4.11984e-05	0.000337827	0	0	25.9684	262.206	RBBP4;RBBP7;MTA2;GATAD2B
141	Chromatin DNA Binding (GO:0031490)	3/83	4.49354e-05	0.00038944	0	0	53.3116	533.664	RBBP4;MTA2;GATAD2B
114	ISWI-type Complex (GO:0031010)	2/13	5.27492e-05	0.000474743	0	0	242.085	2384.53	RBBP4;RBBP7
9	Chromatin Organization (GO:0006325)	4/268	6.53942e-05	0.000806528	0	0	22.9825	221.438	RBBP4;RBBP7;MTA2;GATAD2B
211	PIP3 Activates AKT Signaling R-HSA-1257604	4/268	6.53942e-05	0.000502718	0	0	22.9825	221.438	RBBP4;RBBP7;MTA2;GATAD2B
142	Voltage-Gated Monoatomic Anion Channel Activity (GO:0008308)	2/15	7.09378e-05	0.000395548	0	0	204.821	1956.8	VDAC3;VDAC2
143	Histone Deacetylase Binding (GO:0042826)	3/99	7.60669e-05	0.000395548	0	0	44.3906	420.996	RBBP4;KPNA2;MTA2
10	Positive Regulation Of Nucleic Acid-Templated Transcription (GO:1903508)	5/557	7.71245e-05	0.000856082	0	0	14.6671	138.899	NPAT;RBBP4;RBBP7;MTA2;GATAD2B
11	Negative Regulation Of Stem Cell Population Maintenance (GO:1902455)	2/20	0.000128044	0.00129208	0	0	147.889	1325.55	RBBP4;RBBP7
115	Sin3 Complex (GO:0016580)	2/21	0.000141451	0.000763837	0	0	140.098	1241.77	RBBP4;RBBP7
116	Sin3-type Complex (GO:0070822)	2/21	0.000141451	0.000763837	0	0	140.098	1241.77	RBBP4;RBBP7
212	Transcriptional Regulation By TP53 R-HSA-3700989	4/354	0.00019136	0.00138455	0	0	17.2598	147.767	RBBP4;RBBP7;MTA2;GATAD2B
144	Voltage-Gated Monoatomic Ion Channel Activity (GO:0005244)	2/27	0.000235719	0.00102145	0	0	106.443	889.102	VDAC3;VDAC2
165	Cellular senescence	3/156	0.000292103	0.0084038	0	0	27.7731	226.029	RBBP4;VDAC3;VDAC2
213	Transcriptional Regulation By E2F6 R-HSA-8953750	2/34	0.000375433	0.00256546	0	0	83.1292	655.676	RBBP4;RBBP7
12	Negative Regulation Of Nucleic Acid-Templated Transcription (GO:1903507)	4/456	0.000501341	0.00444367	0	0	13.2954	101.022	RBBP4;RBBP7;MTA2;GATAD2B
13	Positive Regulation Of Stem Cell Population Maintenance (GO:1902459)	2/40	0.00052043	0.00444367	0	0	69.9825	529.127	RBBP4;RBBP7
166	Ferroptosis	2/41	0.000546846	0.0084038	0	0	68.1846	512.158	VDAC3;VDAC2
214	PRC2 Methylates Histones And DNA R-HSA-212300	2/42	0.000573902	0.00352949	0	0	66.4767	496.119	RBBP4;RBBP7
215	Defective Pyroptosis R-HSA-9710421	2/42	0.000573902	0.00352949	0	0	66.4767	496.119	RBBP4;RBBP7
216	PKMTs Methylate Histone Lysines R-HSA-3214841	2/47	0.000718746	0.0042098	0	0	59.0756	427.589	RBBP4;RBBP7
167	Cholesterol metabolism	2/50	0.000813271	0.0084038	0	0	55.375	393.962	VDAC3;VDAC2
117	Intracellular Membrane-Bounded Organelle (GO:0043231)	11/5175	0.000853373	0.00384018	0	0	5.26107	37.1764	ATP6V1A;NPAT;RBBP4;CSE1L;UBN2;VDAC3;VDAC2;RBBP7;KPNA2;MTA2;GATAD2B
145	Monoatomic Anion Channel Activity (GO:0005253)	2/53	0.000913478	0.00339292	0	0	52.1098	364.678	VDAC3;VDAC2
217	Deposition Of New CENPA-containing Nucleosomes At Centromere R-HSA-606279	2/53	0.000913478	0.00510717	0	0	52.1098	364.678	RBBP4;RBBP7
218	Infectious Disease R-HSA-5663205	5/961	0.0009665	0.00516868	0	0	8.2928	57.5672	RBBP4;RBBP7;KPNA2;MTA2;GATAD2B
14	Regulation Of Stem Cell Population Maintenance (GO:2000036)	2/56	0.00101934	0.00808191	0	0	49.2074	338.97	RBBP4;RBBP7
118	Nucleus (GO:0005634)	10/4487	0.00128177	0.00494397	0	0	4.94783	32.9501	NPAT;RBBP4;CSE1L;UBN2;VDAC3;VDAC2;RBBP7;KPNA2;MTA2;GATAD2B
219	Diseases Of Programmed Cell Death R-HSA-9645723	2/71	0.00163257	0.00836694	0	0	38.4812	246.957	RBBP4;RBBP7
15	Import Into Nucleus (GO:0051170)	2/74	0.00177182	0.0131115	0	0	36.8722	233.613	CSE1L;KPNA2
16	Negative Regulation Of Transforming Growth Factor Beta Receptor Signaling Pathway (GO:0030512)	2/77	0.00191655	0.0131637	0	0	35.392	221.456	RBBP4;RBBP7
17	Protein Import Into Nucleus (GO:0006606)	2/79	0.00201606	0.0131637	0	0	34.4693	213.937	CSE1L;KPNA2
18	Establishment Of Protein Localization To Organelle (GO:0072594)	2/85	0.00232906	0.0143625	0	0	31.9679	193.799	CSE1L;KPNA2
220	Activation Of HOX Genes During Differentiation R-HSA-5619507	2/91	0.00266358	0.0126637	0	0	29.8037	176.679	RBBP4;RBBP7
221	Signal Transduction R-HSA-162582	7/2465	0.00270085	0.0126637	0	0	4.99085	29.5168	ATP6V1A;RBBP4;CKB;RBBP7;KPNA2;MTA2;GATAD2B
222	Oxidative Stress Induced Senescence R-HSA-2559580	2/93	0.00277984	0.0126637	0	0	29.1458	171.534	RBBP4;RBBP7
223	HCMV Early Events R-HSA-9609690	2/96	0.00295865	0.0129969	0	0	28.2113	164.275	RBBP4;RBBP7
19	Positive Regulation Of DNA-templated Transcription (GO:0045893)	5/1243	0.00303273	0.0177175	0	0	6.3089	36.5808	NPAT;RBBP4;RBBP7;MTA2;GATAD2B
20	Negative Regulation Of Transcription By RNA Polymerase II (GO:0000122)	4/763	0.00336151	0.018115	0	0	7.79325	44.3854	RBBP4;RBBP7;MTA2;GATAD2B
21	Negative Regulation Of Developmental Process (GO:0051093)	2/109	0.00379431	0.018115	0	0	24.7676	138.061	RBBP4;RBBP7
22	Negative Regulation Of Transmembrane Receptor Protein Serine/Threonine Kinase Signaling Pathway (GO:0090101)	2/111	0.00393156	0.018115	0	0	24.3107	134.65	RBBP4;RBBP7
23	Regulation Of Transforming Growth Factor Beta Receptor Signaling Pathway (GO:0017015)	2/111	0.00393156	0.018115	0	0	24.3107	134.65	RBBP4;RBBP7
24	DNA Replication-Dependent Chromatin Assembly (GO:0006335)	1/5	0.00424314	0.018115	0	0	312.172	1705.22	RBBP4
25	Cellular Heat Acclimation (GO:0070370)	1/5	0.00424314	0.018115	0	0	312.172	1705.22	RBBP7
26	Heat Acclimation (GO:0010286)	1/5	0.00424314	0.018115	0	0	312.172	1705.22	RBBP7
224	Chromosome Maintenance R-HSA-73886	2/118	0.00442997	0.0187892	0	0	22.8356	123.755	RBBP4;RBBP7
225	HCMV Infection R-HSA-9609646	2/121	0.00465211	0.0190737	0	0	22.2566	119.527	RBBP4;RBBP7
27	Protein Localization To Nucleus (GO:0034504)	2/122	0.00472729	0.0194344	0	0	22.07	118.172	CSE1L;KPNA2
28	Response To Increased Oxygen Levels (GO:0036296)	1/6	0.00508974	0.0194814	0	0	249.725	1318.68	ATP6V1A
29	Ribosome-Associated Ubiquitin-Dependent Protein Catabolic Process (GO:1990116)	1/6	0.00508974	0.0194814	0	0	249.725	1318.68	LTN1
226	Sensing Of DNA Double Strand Breaks R-HSA-5693548	1/6	0.00508974	0.0201948	0	0	249.725	1318.68	KPNA2
30	Negative Regulation Of Cell Motility (GO:2000146)	2/133	0.00559128	0.0206877	0	0	20.2056	104.797	RBBP4;RBBP7
31	Mitochondrial Outer Membrane Permeabilization (GO:0097345)	1/7	0.00593566	0.0212535	0	0	208.094	1066.85	VDAC2
119	Spectrin-Associated Cytoskeleton (GO:0014731)	1/7	0.00593566	0.0200329	0	0	208.094	1066.85	EPB41
168	Spinocerebellar ataxia	2/143	0.00643496	0.0426447	0	0	18.7631	94.6789	VDAC3;VDAC2
32	Positive Regulation Of Mitochondrial Membrane Permeability Involved In Apoptotic Process (GO:1902110)	1/8	0.00678091	0.0228085	0	0	178.357	890.652	VDAC2
33	Purine Nucleobase Transport (GO:0006863)	1/8	0.00678091	0.0228085	0	0	178.357	890.652	VDAC3
227	CREB1 Phosphorylation Thru Activation Of CaMKII/CaMKK/CaMKIV Cascasde R-HSA-442729	1/8	0.00678091	0.0260641	0	0	178.357	890.652	KPNA2
120	Mitochondrial Outer Membrane (GO:0005741)	2/151	0.00714922	0.0214477	0	0	17.7485	87.6912	VDAC3;VDAC2
34	Golgi Lumen Acidification (GO:0061795)	1/9	0.00762547	0.0241836	0	0	156.055	760.963	ATP6V1A
35	Cellular Response To Oxygen Levels (GO:0071453)	1/9	0.00762547	0.0241836	0	0	156.055	760.963	ATP6V1A
146	ATPase Activity, Coupled To Transmembrane Movement Of Ions, Rotational Mechanism (GO:0044769)	1/9	0.00762547	0.0198262	0	0	156.055	760.963	ATP6V1A
147	Proton-Transporting ATPase Activity, Rotational Mechanism (GO:0046961)	1/9	0.00762547	0.0198262	0	0	156.055	760.963	ATP6V1A
148	Pyrophosphate Hydrolysis-Driven Proton Transmembrane Transporter Activity (GO:0009678)	1/9	0.00762547	0.0198262	0	0	156.055	760.963	ATP6V1A
169	Necroptosis	2/159	0.00789795	0.0426447	0	0	16.8374	81.5123	VDAC3;VDAC2
36	Negative Regulation Of Cell Migration (GO:0030336)	2/163	0.00828509	0.0254081	0	0	16.4157	78.6855	RBBP4;RBBP7
37	Cellular Response To Increased Oxygen Levels (GO:0036295)	1/10	0.00846937	0.0254081	0	0	138.708	661.819	ATP6V1A
228	Creatine Metabolism R-HSA-71288	1/10	0.00846937	0.0298076	0	0	138.708	661.819	CKB
229	CaMK IV-mediated Phosphorylation Of CREB R-HSA-111932	1/10	0.00846937	0.0298076	0	0	138.708	661.819	KPNA2
230	Cellular Senescence R-HSA-2559583	2/165	0.00848184	0.0298076	0	0	16.2127	77.3317	RBBP4;RBBP7
170	cGMP-PKG signaling pathway	2/167	0.00868069	0.0426447	0	0	16.0145	76.0155	VDAC3;VDAC2
38	Brain Development (GO:0007420)	2/169	0.00888164	0.0259437	0	0	15.8212	74.7355	RBBP4;RBBP7
121	Organelle Outer Membrane (GO:0031968)	2/170	0.0089829	0.0242538	0	0	15.7262	74.1086	VDAC3;VDAC2
39	Endosomal Lumen Acidification (GO:0048388)	1/11	0.00931258	0.0265044	0	0	124.831	583.759	ATP6V1A
40	Negative Regulation Of DNA-templated Transcription (GO:0045892)	4/1025	0.00955113	0.0265044	0	0	5.71446	26.5785	RBBP4;RBBP7;MTA2;GATAD2B
171	NOD-like receptor signaling pathway	2/181	0.010131	0.0426447	0	0	14.7516	67.7415	VDAC3;VDAC2
149	Ribosomal Large Subunit Binding (GO:0043023)	1/13	0.010997	0.0256494	0	0	104.016	469.124	LTN1
172	Neutrophil extracellular trap formation	2/189	0.0110051	0.0426447	0	0	14.1148	63.6492	VDAC3;VDAC2
150	1-Phosphatidylinositol Binding (GO:0005545)	1/14	0.0118382	0.0256494	0	0	96.0096	425.939	EPB41
231	Disease R-HSA-1643685	5/1736	0.0124952	0.042692	0	0	4.39341	19.2537	RBBP4;RBBP7;KPNA2;MTA2;GATAD2B
173	Diabetic cardiomyopathy	2/203	0.0126123	0.0434425	0	0	13.1224	57.3853	VDAC3;VDAC2
232	Polo-like Kinase Mediated Events R-HSA-156711	1/16	0.0135186	0.0437574	0	0	83.2	358.067	RBBP4
233	Transcription Of E2F Targets Under Negative Control By P107 (RBL1) And P130 (RBL2) In Complex With HDAC1 R-HSA-1362300	1/16	0.0135186	0.0437574	0	0	83.2	358.067	RBBP4
41	NLS-bearing Protein Import Into Nucleus (GO:0006607)	1/17	0.0143577	0.0388709	0	0	77.9961	330.974	KPNA2
174	Human T-cell leukemia virus 1 infection	2/219	0.0145677	0.04516	0	0	12.145	51.3606	VDAC3;VDAC2
42	Lysosomal Lumen Acidification (GO:0007042)	1/18	0.0151962	0.0401615	0	0	73.4044	307.323	ATP6V1A
234	Generic Transcription Pathway R-HSA-212436	4/1190	0.0159108	0.0493048	0	0	4.87664	20.193	RBBP4;RBBP7;MTA2;GATAD2B
43	Regulation Of Transcription Involved In G1/S Transition Of Mitotic Cell Cycle (GO:0000083)	1/19	0.0160341	0.0404039	0	0	69.3229	286.514	NPAT
235	Transcription Of E2F Targets Under Negative Control By DREAM Complex R-HSA-1362277	1/19	0.0160341	0.0493048	0	0	69.3229	286.514	RBBP4
44	Negative Regulation Of Multicellular Organismal Process (GO:0051241)	2/231	0.0161154	0.0404039	0	0	11.5016	47.4784	RBBP4;RBBP7
45	Positive Regulation Of Developmental Process (GO:0051094)	2/233	0.01638	0.0404039	0	0	11.4009	46.8769	RBBP4;RBBP7
175	Calcium signaling pathway	2/240	0.0173208	0.0479565	0	0	11.0616	44.8643	VDAC3;VDAC2
122	Proton-Transporting V-type ATPase Complex (GO:0033176)	1/21	0.0177077	0.0434644	0	0	62.3844	251.643	ATP6V1A
46	Positive Regulation Of Viral Life Cycle (GO:1903902)	1/22	0.0185435	0.0445472	0	0	59.4107	236.908	KPNA2
236	Mitochondrial Calcium Ion Transport R-HSA-8949215	1/22	0.0185435	0.0556306	0	0	59.4107	236.908	VDAC2
176	Parkinson disease	2/249	0.0185638	0.0479565	0	0	10.6537	42.4715	VDAC3;VDAC2
47	Regulation Of DNA-templated Transcription (GO:0006355)	5/1922	0.0188623	0.0445472	0	0	3.92671	15.5913	NPAT;RBBP4;RBBP7;MTA2;GATAD2B
48	Rescue Of Stalled Ribosome (GO:0072344)	1/23	0.0193787	0.0448132	0	0	56.7074	223.63	LTN1
49	Regulation Of Viral Life Cycle (GO:1903900)	1/24	0.0202132	0.0457891	0	0	54.2391	211.61	KPNA2
123	Vacuolar Proton-Transporting V-type ATPase Complex (GO:0016471)	1/24	0.0202132	0.0454797	0	0	54.2391	211.61	ATP6V1A
151	Nuclear Localization Sequence Binding (GO:0008139)	1/24	0.0202132	0.0404264	0	0	54.2391	211.61	KPNA2
50	Regulation Of Lysosomal Lumen pH (GO:0035751)	1/25	0.021047	0.0467243	0	0	51.9766	200.681	ATP6V1A
237	Cellular Responses To Stress R-HSA-2262752	3/722	0.0218325	0.0613918	0	0	5.74131	21.9568	ATP6V1A;RBBP4;RBBP7
51	Protein Export From Nucleus (GO:0006611)	1/26	0.0218802	0.0476215	0	0	49.895	190.707	CSE1L
238	Insulin Receptor Recycling R-HSA-77387	1/26	0.0218802	0.0613918	0	0	49.895	190.707	ATP6V1A
239	RNA Polymerase II Transcription R-HSA-73857	4/1312	0.0220437	0.0613918	0	0	4.39308	16.7584	RBBP4;RBBP7;MTA2;GATAD2B
177	Prion disease	2/273	0.0220582	0.0502923	0	0	9.6984	36.9904	VDAC3;VDAC2
178	Collecting duct acid secretion	1/27	0.0227126	0.0502923	0	0	47.9736	181.572	ATP6V1A
240	G0 And Early G1 R-HSA-1538133	1/27	0.0227126	0.0613918	0	0	47.9736	181.572	RBBP4
241	Cellular Responses To Stimuli R-HSA-8953897	3/736	0.0229595	0.0613918	0	0	5.62756	21.2385	ATP6V1A;RBBP4;RBBP7
52	Regulation Of Transcription By RNA Polymerase II (GO:0006357)	5/2028	0.0233364	0.0494044	0	0	3.69913	13.9004	NPAT;RBBP4;RBBP7;MTA2;GATAD2B
53	Central Nervous System Development (GO:0007417)	2/283	0.0235895	0.0494044	0	0	9.34852	35.0285	RBBP4;RBBP7
54	Vacuolar Acidification (GO:0007035)	1/29	0.0243756	0.0501054	0	0	44.5424	165.438	ATP6V1A
242	G1/S-Specific Transcription R-HSA-69205	1/29	0.0243756	0.0637914	0	0	44.5424	165.438	RBBP4
55	Nucleic Acid Metabolic Process (GO:0090304)	1/30	0.0252061	0.0508704	0	0	43.0043	158.285	KPNA2
243	Transferrin Endocytosis And Recycling R-HSA-917977	1/31	0.0260359	0.066717	0	0	41.5688	151.654	ATP6V1A
56	Intracellular pH Reduction (GO:0051452)	1/32	0.026865	0.0532504	0	0	40.2258	145.494	ATP6V1A
179	Huntington disease	2/306	0.027274	0.0563662	0	0	8.63114	31.0878	VDAC3;VDAC2
244	CaM Pathway R-HSA-111997	1/33	0.0276935	0.0695164	0	0	38.9668	139.757	KPNA2
57	Regulation Of Metal Ion Transport (GO:0010959)	1/34	0.0285214	0.0555416	0	0	37.7841	134.402	EPB41
245	Ca-dependent Events R-HSA-111996	1/35	0.0293485	0.0721496	0	0	36.671	129.394	KPNA2
246	ROS And RNS Production In Phagocytes R-HSA-1222556	1/36	0.030175	0.0721496	0	0	35.6214	124.701	ATP6V1A
58	Intracellular Protein Transport (GO:0006886)	2/325	0.0304834	0.0583389	0	0	8.11558	28.328	CSE1L;KPNA2
247	Gene Expression (Transcription) R-HSA-74160	4/1449	0.0305023	0.0721496	0	0	3.9474	13.7763	RBBP4;RBBP7;MTA2;GATAD2B
248	DAG And IP3 Signaling R-HSA-1489509	1/39	0.0326505	0.0757739	0	0	32.8043	112.253	KPNA2
59	Cellular Response To Heat (GO:0034605)	1/40	0.0334744	0.0629772	0	0	31.9615	108.573	RBBP7
60	Positive Regulation Of Viral Process (GO:0048524)	1/41	0.0342976	0.0634505	0	0	31.1609	105.096	KPNA2
152	Signal Sequence Binding (GO:0005048)	1/41	0.0342976	0.0636955	0	0	31.1609	105.096	KPNA2
61	Translational Elongation (GO:0006414)	1/42	0.0351201	0.0639071	0	0	30.3994	101.807	LTN1
249	NS1 Mediated Effects On Host Pathways R-HSA-168276	1/42	0.0351201	0.0785413	0	0	30.3994	101.807	KPNA2
250	RND3 GTPase Cycle R-HSA-9696264	1/42	0.0351201	0.0785413	0	0	30.3994	101.807	CKB
62	Regulation Of DNA Recombination (GO:0000018)	1/44	0.0367632	0.0647732	0	0	28.9826	95.7369	KPNA2
63	Regulation Of Transport (GO:0051049)	1/44	0.0367632	0.0647732	0	0	28.9826	95.7369	EPB41
180	Alzheimer disease	2/369	0.038463	0.0717765	0	0	7.12661	23.2189	VDAC3;VDAC2
153	Calcium-Dependent Phospholipid Binding (GO:0005544)	1/47	0.0392229	0.0677246	0	0	27.0883	87.7254	CPNE5
251	PLC Beta Mediated Events R-HSA-112043	1/47	0.0392229	0.0861502	0	0	27.0883	87.7254	KPNA2
64	Proton Transmembrane Transport (GO:1902600)	1/49	0.0408594	0.0683587	0	0	25.957	83.0007	ATP6V1A
65	Nuclear Export (GO:0051168)	1/49	0.0408594	0.0683587	0	0	25.957	83.0007	CSE1L
252	RMTs Methylate Histone Arginines R-HSA-3214858	1/49	0.0408594	0.0881703	0	0	25.957	83.0007	RBBP7
66	Intracellular Iron Ion Homeostasis (GO:0006879)	1/50	0.0416767	0.0683587	0	0	25.426	80.7992	ATP6V1A
67	Positive Regulation Of Developmental Growth (GO:0048639)	1/50	0.0416767	0.0683587	0	0	25.426	80.7992	CPNE5
154	Cholesterol Binding (GO:0015485)	1/50	0.0416767	0.0677246	0	0	25.426	80.7992	VDAC2
181	Arginine and proline metabolism	1/50	0.0416767	0.0717765	0	0	25.426	80.7992	CKB
182	Vibrio cholerae infection	1/50	0.0416767	0.0717765	0	0	25.426	80.7992	ATP6V1A
253	Neuronal System R-HSA-112316	2/386	0.0417409	0.0885196	0	0	6.80521	21.6152	EPB41;KPNA2
68	Positive Regulation Of Multicellular Organismal Process (GO:0051240)	2/387	0.041937	0.0683587	0	0	6.78719	21.5261	RBBP4;RBBP7
69	Positive Regulation Of Protein Localization To Cell Periphery (GO:1904377)	1/51	0.0424933	0.0683587	0	0	24.9163	78.6957	EPB41
254	G-protein Mediated Events R-HSA-112040	1/52	0.0433092	0.0902887	0	0	24.4265	76.6842	KPNA2
70	Endosome Organization (GO:0007032)	1/53	0.0441245	0.0699689	0	0	23.9555	74.759	ATP6V1A
71	Nucleosome Assembly (GO:0006334)	1/54	0.0449392	0.070257	0	0	23.5024	72.9148	RBBP4
255	Amino Acids Regulate mTORC1 R-HSA-9639288	1/55	0.0457532	0.093794	0	0	23.066	71.1469	ATP6V1A
72	Regulation Of Calcium Ion Transport (GO:0051924)	1/57	0.0473792	0.0720424	0	0	22.24	67.8223	EPB41
73	Monoatomic Anion Transport (GO:0006820)	1/57	0.0473792	0.0720424	0	0	22.24	67.8223	VDAC2
256	Neurexins And Neuroligins R-HSA-6794361	1/57	0.0473792	0.0955351	0	0	22.24	67.8223	EPB41
74	Positive Regulation Of Protein Binding (GO:0032092)	1/59	0.0490026	0.0725239	0	0	21.4709	64.7537	EPB41
75	protein-DNA Complex Assembly (GO:0065004)	1/59	0.0490026	0.0725239	0	0	21.4709	64.7537	RBBP4
155	Sterol Binding (GO:0032934)	1/59	0.0490026	0.0749452	0	0	21.4709	64.7537	VDAC2
257	Iron Uptake And Transport R-HSA-917937	1/59	0.0490026	0.0972149	0	0	21.4709	64.7537	ATP6V1A
76	protein-DNA Complex Organization (GO:0071824)	1/60	0.0498134	0.0727538	0	0	21.1059	63.3066	MTA2
258	DNA Double Strand Break Response R-HSA-5693606	1/61	0.0506235	0.097292	0	0	20.7531	61.9136	KPNA2
259	Post NMDA Receptor Activation Events R-HSA-438064	1/61	0.0506235	0.097292	0	0	20.7531	61.9136	KPNA2
77	Regulation Of Cell Migration (GO:0030334)	2/434	0.0515448	0.0743048	0	0	6.03426	17.8934	RBBP4;RBBP7
78	G1/S Transition Of Mitotic Cell Cycle (GO:0000082)	1/63	0.0522417	0.074344	0	0	20.0817	59.2785	NPAT
124	Cortical Cytoskeleton (GO:0030863)	1/63	0.0522417	0.10231	0	0	20.0817	59.2785	EPB41
125	Acrosomal Vesicle (GO:0001669)	1/64	0.0530498	0.10231	0	0	19.7619	58.0313	VDAC2
260	Cytochrome P450 - Arranged By Substrate Type R-HSA-211897	1/65	0.0538573	0.101915	0	0	19.4521	56.8278	VDAC2
79	Regulation Of Nucleic Acid-Templated Transcription (GO:1903506)	2/452	0.0554193	0.0778676	0	0	5.78756	16.7424	RBBP4;RBBP7
80	Cellular Response To Calcium Ion (GO:0071277)	1/69	0.0570808	0.0791996	0	0	18.3042	52.4103	CPNE5
183	Epithelial cell signaling in Helicobacter pylori infection	1/70	0.0578851	0.0938035	0	0	18.038	51.3957	ATP6V1A
184	Pathways of neurodegeneration	2/475	0.0605184	0.0938035	0	0	5.49965	15.4255	VDAC3;VDAC2
261	Activation Of NMDA Receptors And Postsynaptic Events R-HSA-442755	1/74	0.0610956	0.113631	0	0	17.0462	47.6496	KPNA2
81	Nucleosome Organization (GO:0034728)	1/75	0.0618967	0.0848213	0	0	16.815	46.7843	RBBP4
262	ISG15 Antiviral Mechanism R-HSA-1169408	1/75	0.0618967	0.113631	0	0	16.815	46.7843	KPNA2
82	Actomyosin Structure Organization (GO:0031032)	1/77	0.0634968	0.085953	0	0	16.3709	45.1307	EPB41
263	Signaling By Insulin Receptor R-HSA-74752	1/77	0.0634968	0.114854	0	0	16.3709	45.1307	ATP6V1A
185	Synaptic vesicle cycle	1/78	0.0642959	0.094913	0	0	16.1575	44.3403	ATP6V1A
83	Regulation Of Gene Expression (GO:0010468)	3/1127	0.0672127	0.0898869	0	0	3.59539	9.70716	NPAT;RBBP4;RBBP7
264	Cyclin E Associated Events During G1/S Transition R-HSA-69202	1/82	0.0674859	0.119669	0	0	15.3565	41.3986	RBBP4
265	Antiviral Mechanism By IFN-stimulated Genes R-HSA-1169410	1/83	0.0682818	0.119669	0	0	15.1684	40.7138	KPNA2
266	Cyclin A:Cdk2-associated Events At S Phase Entry R-HSA-69656	1/84	0.069077	0.119669	0	0	14.9849	40.0477	RBBP4
156	Ribosome Binding (GO:0043022)	1/85	0.0698717	0.100926	0	0	14.8058	39.3997	LTN1
267	Opioid Signaling R-HSA-111885	1/88	0.0722517	0.121739	0	0	14.2931	37.5566	KPNA2
268	Protein-protein Interactions At Synapses R-HSA-6794362	1/88	0.0722517	0.121739	0	0	14.2931	37.5566	EPB41
84	Positive Regulation Of Binding (GO:0051099)	1/91	0.074626	0.0979909	0	0	13.8146	35.8525	EPB41
85	Negative Regulation Of Cellular Process (GO:0048523)	2/537	0.0750381	0.0979909	0	0	4.84685	12.5522	RBBP4;RBBP7
126	Mitochondrial Membrane (GO:0031966)	2/540	0.0757676	0.136382	0	0	4.81908	12.4336	VDAC3;VDAC2
186	Rheumatoid arthritis	1/93	0.0762057	0.107381	0	0	13.5129	34.7865	ATP6V1A
86	Regulation Of Macroautophagy (GO:0016241)	1/96	0.0785705	0.101411	0	0	13.0842	33.2831	ATP6V1A
269	Phase I - Functionalization Of Compounds R-HSA-211945	1/104	0.0848487	0.141032	0	0	12.0631	29.7583	VDAC2
87	Response To Calcium Ion (GO:0051592)	1/106	0.086412	0.108746	0	0	11.8321	28.9725	CPNE5
88	Positive Regulation Of Cell Growth (GO:0030307)	1/106	0.086412	0.108746	0	0	11.8321	28.9725	CPNE5
157	Phosphatidylinositol Binding (GO:0035091)	1/106	0.086412	0.118248	0	0	11.8321	28.9725	EPB41
270	HATs Acetylate Histones R-HSA-3214847	1/106	0.086412	0.141716	0	0	11.8321	28.9725	RBBP7
89	Monoatomic Ion Transport (GO:0006811)	1/107	0.0871926	0.108746	0	0	11.7199	28.5924	VDAC2
90	Cellular Response To Salt (GO:1902075)	1/109	0.0887521	0.109461	0	0	11.5017	27.8561	CPNE5
127	Cytoskeleton (GO:0005856)	2/599	0.0905787	0.152851	0	0	4.32965	10.3978	EPB41;TAGLN2
91	Regulation Of Protein Binding (GO:0043393)	1/118	0.0957389	0.11678	0	0	10.6122	24.8976	EPB41
271	Estrogen-dependent Gene Expression R-HSA-9018519	1/119	0.096512	0.156197	0	0	10.5217	24.6007	KPNA2
272	SARS-CoV-2 Activates/Modulates Innate And Adaptive Immune Responses R-HSA-9705671	1/121	0.0980565	0.156636	0	0	10.3453	24.024	KPNA2
92	Regulation Of DNA Metabolic Process (GO:0051052)	1/124	0.100369	0.119429	0	0	10.0915	23.1993	KPNA2
93	Negative Regulation Of Growth (GO:0045926)	1/124	0.100369	0.119429	0	0	10.0915	23.1993	RBBP7
94	Negative Regulation Of Cell Growth (GO:0030308)	1/125	0.101138	0.119429	0	0	10.0096	22.9346	RBBP7
273	Platelet Degranulation R-HSA-114608	1/125	0.101138	0.159487	0	0	10.0096	22.9346	TAGLN2
274	G1/S Transition R-HSA-69206	1/129	0.10421	0.159618	0	0	9.69482	21.9234	RBBP4
275	Response To Elevated Platelet Cytosolic Ca2+ R-HSA-76005	1/130	0.104976	0.159618	0	0	9.61919	21.6819	TAGLN2
276	Cell Cycle R-HSA-1640170	2/654	0.105115	0.159618	0	0	3.95317	8.90532	RBBP4;RBBP7
95	Epithelial Cell Differentiation (GO:0030855)	1/132	0.106507	0.124445	0	0	9.47137	21.2116	TAGLN2
187	Oxidative phosphorylation	1/133	0.107271	0.144583	0	0	9.39915	20.9826	ATP6V1A
96	Cellular Response To Metal Ion (GO:0071248)	1/135	0.108799	0.125798	0	0	9.25793	20.5365	CPNE5
128	Mitotic Spindle (GO:0072686)	1/143	0.114883	0.175731	0	0	8.73283	18.8965	EPB41
97	Actin Filament Organization (GO:0007015)	1/144	0.115641	0.132331	0	0	8.67133	18.7064	TAGLN2
129	Mitochondrial Envelope (GO:0005740)	1/146	0.117154	0.175731	0	0	8.55086	18.3353	VDAC2
277	Mitotic G1 Phase And G1/S Transition R-HSA-453279	1/147	0.11791	0.174875	0	0	8.49187	18.1542	RBBP4
278	DNA Double-Strand Break Repair R-HSA-5693532	1/149	0.11942	0.174875	0	0	8.37627	17.8005	KPNA2
279	Transport Of Small Molecules R-HSA-382551	2/706	0.119427	0.174875	0	0	3.65133	7.75926	ATP6V1A;VDAC2
188	Phagosome	1/152	0.121681	0.152749	0	0	8.20861	17.2902	ATP6V1A
280	Cellular Response To Starvation R-HSA-9711097	1/153	0.122433	0.177168	0	0	8.15419	17.1254	ATP6V1A
98	Epithelium Development (GO:0060429)	1/154	0.123185	0.139526	0	0	8.10049	16.963	TAGLN2
189	mTOR signaling pathway	1/154	0.123185	0.152749	0	0	8.10049	16.963	ATP6V1A
281	Influenza Infection R-HSA-168255	1/157	0.125436	0.179403	0	0	7.94351	16.4904	KPNA2
282	S Phase R-HSA-69242	1/161	0.12843	0.181573	0	0	7.74336	15.8923	RBBP4
99	Regulation Of Macromolecule Metabolic Process (GO:0060255)	1/162	0.129176	0.144834	0	0	7.69488	15.7481	NPAT
190	Hepatitis B	1/162	0.129176	0.154018	0	0	7.69488	15.7481	VDAC3
130	Basolateral Plasma Membrane (GO:0016323)	1/171	0.135871	0.19308	0	0	7.28419	14.5396	EPB41
191	Influenza A	1/172	0.136612	0.156851	0	0	7.24123	14.4145	KPNA2
283	Ion Channel Transport R-HSA-983712	1/175	0.138831	0.194048	0	0	7.1153	14.0492	ATP6V1A
284	G2/M Transition R-HSA-69275	1/182	0.143987	0.196605	0	0	6.83771	13.2517	RBBP4
285	Neurotransmitter Receptors And Postsynaptic Signal Transmission R-HSA-112314	1/182	0.143987	0.196605	0	0	6.83771	13.2517	KPNA2
286	Mitotic G2-G2/M Phases R-HSA-453274	1/184	0.145455	0.196605	0	0	6.7623	13.0369	RBBP4
287	ESR-mediated Signaling R-HSA-8939211	1/188	0.148384	0.198383	0	0	6.61631	12.6236	KPNA2
100	Intracellular Monoatomic Cation Homeostasis (GO:0030003)	1/190	0.149845	0.166328	0	0	6.54563	12.4246	ATP6V1A
288	SARS-CoV-2-host Interactions R-HSA-9705683	1/196	0.154214	0.20396	0	0	6.34231	11.8564	KPNA2
289	Interferon Signaling R-HSA-913531	1/200	0.157114	0.204359	0	0	6.21357	11.5	KPNA2
290	Ub-specific Processing Proteases R-HSA-5689880	1/201	0.157838	0.204359	0	0	6.18219	11.4135	VDAC2
192	Viral carcinogenesis	1/203	0.159284	0.17635	0	0	6.12036	11.2435	VDAC3
131	Spindle (GO:0005819)	1/210	0.164325	0.221839	0	0	5.91328	10.6788	EPB41
291	Biological Oxidations R-HSA-211859	1/218	0.170052	0.217879	0	0	5.69297	10.086	VDAC2
101	Regulation Of Cell Growth (GO:0001558)	1/227	0.17645	0.19392	0	0	5.46377	9.4781	RBBP7
132	Nuclear Membrane (GO:0031965)	1/227	0.17645	0.223484	0	0	5.46377	9.4781	KPNA2
158	RNA Polymerase II-specific DNA-binding Transcription Factor Binding (GO:0061629)	1/228	0.177158	0.230305	0	0	5.43943	9.41409	MTA2
133	Vesicle (GO:0031982)	1/235	0.182098	0.223484	0	0	5.27484	8.98415	TAGLN2
292	Neddylation R-HSA-8951664	1/237	0.183505	0.232692	0	0	5.22961	8.86688	RBBP7
193	Chemical carcinogenesis	1/239	0.184909	0.197661	0	0	5.18514	8.75195	KPNA2
102	Regulation Of Autophagy (GO:0010506)	1/241	0.186311	0.20275	0	0	5.14141	8.63931	ATP6V1A
293	Transmission Across Chemical Synapses R-HSA-112315	1/246	0.189805	0.238225	0	0	5.0352	8.36728	KPNA2
194	Salmonella infection	1/249	0.191895	0.198292	0	0	4.97354	8.21034	CSE1L
294	Platelet Activation, Signaling And Aggregation R-HSA-76002	1/254	0.195368	0.242729	0	0	4.87401	7.95864	TAGLN2
295	Signaling By Nuclear Receptors R-HSA-9006931	1/260	0.199516	0.245404	0	0	4.75965	7.67191	KPNA2
296	Deubiquitination R-HSA-5688426	1/279	0.212518	0.25881	0	0	4.43008	6.86098	VDAC2
103	Monoatomic Cation Transmembrane Transport (GO:0098655)	1/281	0.213876	0.230439	0	0	4.39799	6.78329	ATP6V1A
159	DNA-binding Transcription Factor Binding (GO:0140297)	1/282	0.214553	0.259183	0	0	4.38212	6.74494	MTA2
297	SARS-CoV-2 Infection R-HSA-9694516	1/283	0.21523	0.259543	0	0	4.36636	6.70692	KPNA2
104	Inorganic Cation Transmembrane Transport (GO:0098662)	1/284	0.215907	0.230439	0	0	4.35071	6.66923	ATP6V1A
134	Lytic Vacuole Membrane (GO:0098852)	1/287	0.217934	0.255835	0	0	4.30441	6.55805	ATP6V1A
105	DNA Metabolic Process (GO:0006259)	1/288	0.218608	0.2311	0	0	4.2892	6.52162	KPNA2
298	Immune System R-HSA-168256	3/1943	0.224938	0.268615	0	0	1.99297	2.97337	ATP6V1A;LTN1;KPNA2
299	Developmental Biology R-HSA-1266738	2/1073	0.230903	0.269716	0	0	2.35444	3.45103	RBBP4;RBBP7
300	Antigen Processing: Ubiquitination And Proteasome Degradation R-HSA-983168	1/307	0.231319	0.269716	0	0	4.019	5.88364	LTN1
301	DNA Repair R-HSA-73894	1/310	0.233308	0.269716	0	0	3.97937	5.79156	KPNA2
160	Ubiquitin Protein Ligase Activity (GO:0061630)	1/311	0.23397	0.259183	0	0	3.96633	5.76135	LTN1
302	G Alpha (I) Signaling Events R-HSA-418594	1/312	0.234631	0.269716	0	0	3.95338	5.73137	KPNA2
106	Supramolecular Fiber Organization (GO:0097435)	1/316	0.237272	0.24819	0	0	3.90238	5.61377	TAGLN2
107	Proteasome-Mediated Ubiquitin-Dependent Protein Catabolic Process (GO:0043161)	1/319	0.239246	0.24819	0	0	3.86498	5.52793	LTN1
161	Ubiquitin-Like Protein Ligase Activity (GO:0061659)	1/319	0.239246	0.259183	0	0	3.86498	5.52793	LTN1
162	Cadherin Binding (GO:0045296)	1/319	0.239246	0.259183	0	0	3.86498	5.52793	TAGLN2
135	Actin Cytoskeleton (GO:0015629)	1/327	0.244488	0.275049	0	0	3.7686	5.3084	TAGLN2
195	Human papillomavirus infection	1/331	0.247096	0.247096	0	0	3.72216	5.20349	ATP6V1A
136	Lysosomal Membrane (GO:0005765)	1/356	0.263207	0.284263	0	0	3.45563	4.61263	ATP6V1A
303	Metabolism Of Amino Acids And Derivatives R-HSA-71291	1/364	0.268293	0.305556	0	0	3.3781	4.44448	CKB
304	Class I MHC Mediated Antigen Processing And Presentation R-HSA-983169	1/378	0.277115	0.312708	0	0	3.25033	4.17122	LTN1
108	Negative Regulation Of Cell Population Proliferation (GO:0008285)	1/379	0.277742	0.285457	0	0	3.24157	4.15266	RBBP4
109	Cellular Response To Oxygen-Containing Compound (GO:1901701)	1/406	0.29446	0.299862	0	0	3.0213	3.69388	CPNE5
163	Ubiquitin-Protein Transferase Activity (GO:0004842)	1/412	0.298125	0.31005	0	0	2.97628	3.60202	LTN1
305	RHO GTPase Cycle R-HSA-9012999	1/441	0.315589	0.352886	0	0	2.77599	3.20159	CKB
306	Post-translational Protein Modification R-HSA-597592	2/1383	0.330724	0.366478	0	0	1.79599	1.98722	VDAC2;RBBP7
307	Signaling By Receptor Tyrosine Kinases R-HSA-9006934	1/496	0.347594	0.381733	0	0	2.46061	2.60017	ATP6V1A
137	Lysosome (GO:0005764)	1/503	0.351565	0.365086	0	0	2.42542	2.53544	ATP6V1A
308	Cell Cycle, Mitotic R-HSA-69278	1/523	0.362785	0.39489	0	0	2.3301	2.3626	RBBP4
309	Hemostasis R-HSA-109582	1/576	0.391641	0.42256	0	0	2.10957	1.97753	TAGLN2
[truncated: 13 more rows]

[truncated: 10 more sheets: Cluster10, Cluster11, Cluster12, Cluster13, Cluster14, Cluster15, Cluster16, Cluster17, Cluster18, Cluster19]
