# Supplementary material for: A protein-proximity screen reveals Ebola virus co-opts the mRNA decapping complex through the scaffold protein EDC4
Source: Research Square preprint supplement (doi:10.21203/rs.3.rs-3838220/v1), 2024-02-01
Supplement: Supplementary file 14 [file Extended data table 5.xlsx]

## Sheet: Sheet1
Probe Number
1	AAG CTC GGG GAA TGT CAC CTC GAG AGC CCT CCT AAG TTT CGA GCT GGA CTC AGT G
2	ATG TGG ATG ACA GGT GGA GCA GCA TCT TGC CTC CTA AGT TTC GAG CTG GAC TCA GTG
3	CAG GCT GGC CTG GAA CTC AGC ATG AAC CTC CTA AGT TTC GAG CTG GAC TCA GTG
4	AAC ACT TTG AGG GAC GGT CTC ATC TCT AGA CCT CCT AAG TTT CGA GCT GGA CTC AGT G
5	AGA CCA TTC TCA AGA CTC GTA ATG CGT TGT TCC TCC TAA GTT TCG AGC TGG ACT CAG TG
6	AAT TCT TCC GGT CAT TAG CTG CTC AGA GAC CTC CTA AGT TTC GAG CTG GAC TCA GTG
7	GAT ATT CCT CTT CAA GGG AGT CTG GAT ACG TCC TCC TAA GTT TCG AGC TGG ACT CAG TG
8	AGG GAA TGT CGT CAT CAT CAT CGT AAT GTC CCC TCC TAA GTT TCG AGC TGG ACT CAG TG
9	ATA CTG TTC TCC AAC ATT TAC TCC TGC GAC CTC CTA AGT TTC GAG CTG GAC TCA GTG
10	GAG TGC AGC CTT AAA GGA GTT CAC CTC ATT CCT CCT AAG TTT CGA GCT GGA CTC AGT G
11	AGC AAT TCC TCA AGG CGC TTC ACT CCC CTC CTA AGT TTC GAG CTG GAC TCA GTG
12	CAG ATT CAG TGA GAC TCG GCG CCA TCC CCT CCT AAG TTT CGA GCT GGA CTC AGT G
13	CTG CTA TTA TTC GCC TCT TTC GGA GGG AAC CTC CTA AGT TTC GAG CTG GAC TCA GTG
14	TTG AGT CCA AGT GTT TTA CCA TCT TGA AGC TGC CTC CTA AGT TTC GAG CTG GAC TCA GTG
15	CGA TGG TGG GAC TGG ACG CAA GCT TTT CTC CTC CTA AGT TTC GAG CTG GAC TCA GTG
16	AAG TGG TAC TGT TTA GAT TGT TGA ATG CCT CCC CTC CTA AGT TTC GAG CTG GAC TCA GTG
17	AAT GAT TCT GAT GCG ATG GTT TGT TGT TGC ACC CTC CTA AGT TTC GAG CTG GAC TCA GTG
18	ACT ATG ATT GCA AAT TGG GTC CGT TTG GGT TTC CTC CTA AGT TTC GAG CTG GAC TCA GTG
19	CTG TTG CGC GTC TTC GGG TTT GGC TTC CCT CCT AAG TTT CGA GCT GGA CTC AGT G
20	TTG TTG CAT TTG GGA TGC GTA GCA TAA TCC TCC TCC TAA GTT TCG AGC TGG ACT CAG TG
21	GTT TTG AGT CGT GGC CGC AGT ATG GCC CCT CCT AAG TTT CGA GCT GGA CTC AGT G
22	TGC CCT TTG TTC TAG TTG TCA TCT TGT TAG ACC CTC CTA AGT TTC GAG CTG GAC TCA GTG
23	GTT CCA TGC TCA TTC ACT GAT GAT GTT GCC CTC CTA AGT TTC GAG CTG GAC TCA GTG
24	ATT CAT AGC CTC TTT TTC AGT GAG CCA TGG CCT CCT AAG TTT CGA GCT GGA CTC AGT G
25	TTG AGT GTG GTC CTG ATC TTG TTG CTC GTC CTC CTA AGT TTC GAG CTG GAC TCA GTG
26	TGC GGG AGT TCT TTC TTT TCA GAG TGA TCT CCC TCC TAA GTT TCG AGC TGG ACT CAG TG
27	GTG TGC GGT TGG AAG TTC CGT CCC TGT CCT CCT AAG TTT CGA GCT GGA CTC AGT G
28	TGC TCT TCA TCA TCT GAC TCC AAG GGC CTC CTA AGT TTC GAG CTG GAC TCA GTG
29	GAA GGC TAG ACG TCT CGT CGT CGG CAT CCT CCT AAG TTT CGA GCT GGA CTC AGT G
30	TCC AGT GGG TCT GCC TCT TCG TTA ATT GCC TCC TAA GTT TCG AGC TGG ACT CAG TG
Flap Probe	/5Cy5/CACTGAGTCCAGCTCGAAACTTAGGAGG/3Cy5Sp/
